# Supplementary material
Source: publisher figshare collection journal article supplement (https://acs.figshare.com/ndownloader/files/3836782)
Supplement: Supplementary file 1 [file 3836782]

 
data_erj27 
  
_audit_creation_method            'SHELXL-2014/7' 
_shelx_SHELXL_version_number      '2014/7' 
_chemical_name_systematic         ? 
_chemical_name_common             ? 
_chemical_melting_point           ? 
_chemical_formula_moiety          ? 
_chemical_formula_sum 
 'C22 H19 Br O2' 
_chemical_formula_weight          395.28 
  
loop_ 
 _atom_type_symbol 
 _atom_type_description 
 _atom_type_scat_dispersion_real 
 _atom_type_scat_dispersion_imag 
 _atom_type_scat_source 
 'C'  'C'   0.0033   0.0016 
 'International Tables Vol C Tables 4.2.6.8 and 6.1.1.4' 
 'H'  'H'   0.0000   0.0000 
 'International Tables Vol C Tables 4.2.6.8 and 6.1.1.4' 
 'O'  'O'   0.0106   0.0060 
 'International Tables Vol C Tables 4.2.6.8 and 6.1.1.4' 
 'Br'  'Br'  -0.2901   2.4595 
 'International Tables Vol C Tables 4.2.6.8 and 6.1.1.4' 
  
_space_group_crystal_system       monoclinic 
_space_group_IT_number            4 
_space_group_name_H-M_alt         'P 21' 
_space_group_name_Hall            'P 2yb' 
  
_shelx_space_group_comment 
; 
The symmetry employed for this shelxl refinement is uniquely defined 
by the following loop, which should always be used as a source of 
symmetry information in preference to the above space-group names. 
They are only intended as comments. 
; 
  
loop_ 
 _space_group_symop_operation_xyz 
 'x, y, z' 
 '-x, y+1/2, -z' 
  
_cell_length_a                    14.6894(8) 
_cell_length_b                    5.9472(3) 
_cell_length_c                    20.3256(11) 
_cell_angle_alpha                 90 
_cell_angle_beta                  98.8906(7) 
_cell_angle_gamma                 90 
_cell_volume                      1754.33(16) 
_cell_formula_units_Z             4 
_cell_measurement_temperature     133(2) 
_cell_measurement_reflns_used     9988 
_cell_measurement_theta_min       2.28 
_cell_measurement_theta_max       28.73 
  
_exptl_crystal_description        prism 
_exptl_crystal_colour             colorless 
_exptl_crystal_density_meas       not_measured 
_exptl_crystal_density_method     not_measured 
_exptl_crystal_density_diffrn     1.497 
_exptl_crystal_F_000              808 
_exptl_transmission_factor_min    ? 
_exptl_transmission_factor_max    ? 
_exptl_crystal_size_max           0.528 
_exptl_crystal_size_mid           0.279 
_exptl_crystal_size_min           0.126 
_exptl_absorpt_coefficient_mu     2.355 
_shelx_estimated_absorpt_T_min    0.369 
_shelx_estimated_absorpt_T_max    0.756 
_exptl_absorpt_correction_type    numerical 
_exptl_absorpt_correction_T_min   0.3438 
_exptl_absorpt_correction_T_max   0.5922 
_exptl_absorpt_process_details    'Bruker SADABS 2014/5' 
_exptl_absorpt_special_details    ? 
_diffrn_ambient_temperature       133(2) 
_diffrn_radiation_wavelength      0.71073 
_diffrn_radiation_type            MoK\a 
_diffrn_source                    'fine-focus sealed tube' 
_diffrn_measurement_device_type   'Bruker SMART APEX II CCD' 
_diffrn_measurement_method        '\f and \w scans' 
_diffrn_detector_area_resol_mean  ? 
_diffrn_reflns_number             21151 
_diffrn_reflns_av_unetI/netI      0.0244 
_diffrn_reflns_av_R_equivalents   0.0181 
_diffrn_reflns_limit_h_min        -19 
_diffrn_reflns_limit_h_max        19 
_diffrn_reflns_limit_k_min        -8 
_diffrn_reflns_limit_k_max        7 
_diffrn_reflns_limit_l_min        -27 
_diffrn_reflns_limit_l_max        27 
_diffrn_reflns_theta_min          1.403 
_diffrn_reflns_theta_max          28.748 
_diffrn_reflns_theta_full         25.500 
_diffrn_measured_fraction_theta_max   0.941 
_diffrn_measured_fraction_theta_full  1.000 
_diffrn_reflns_Laue_measured_fraction_max    0.941 
_diffrn_reflns_Laue_measured_fraction_full   1.000 
_diffrn_reflns_point_group_measured_fraction_max   0.915 
_diffrn_reflns_point_group_measured_fraction_full  1.000 
_reflns_number_total              8341 
_reflns_number_gt                 7989 
_reflns_threshold_expression      'I > 2\s(I)' 
_reflns_Friedel_coverage          0.780 
_reflns_Friedel_fraction_max      0.885 
_reflns_Friedel_fraction_full     0.999 
  
_reflns_special_details 
; 
 Reflections were merged by SHELXL according to the crystal 
 class for the calculation of statistics and refinement. 
  
 _reflns_Friedel_fraction is defined as the number of unique 
 Friedel pairs measured divided by the number that would be 
 possible theoretically, ignoring centric projections and 
 systematic absences. 
; 
  
_computing_data_collection        'Bruker APEX2 2014.11-0, 2014' 
_computing_cell_refinement        'Bruker SAINT 8.34a, 2013' 
_computing_data_reduction         'Bruker SAINT 8.34a, 2013' 
_computing_structure_solution     'Bruker SHELXTL 2014/4' 
_computing_structure_refinement 'SHELXL-2014/7 (Sheldrick, 2014)' 
_computing_molecular_graphics     'Bruker SHELXTL' 
_computing_publication_material   'Bruker SHELXTL' 
_refine_special_details           
;
A colorless crystal of approximate dimensions 0.126 x 0.279 x 0.528 mm was mounted on a 
glass fiber and transferred to a Bruker SMART APEX II diffractometer.  The APEX2 program 
package was used to determine the unit-cell parameters and for data collection (15 sec/frame 
scan time for a sphere of diffraction data).  The raw frame data was processed using SAINT 
and SADABS to yield the reflection data file.  Subsequent calculations were carried out 
using the SHELXTL program.  The diffraction symmetry was 2/m and the systematic absences 
were consistent with the monoclinic space groups P21 and P21/m.  It was later determined 
that the noncentrosymmetric space group P21 was correct.

The structure was solved by direct methods and refined on F2 by full-matrix least-squares 
techniques.  The analytical scattering factors for neutral atoms were used throughout the 
analysis.  Hydrogen atoms were located from a difference-Fourier map and refined (x,y,z and 
fixed Uiso).  There were two molecules of the formula-unit present (Z = 4).

At convergence, wR2 = 0.0514 and Goof = 1.051 for 565 variables refined against 8341 data 
(0.74�), R1 = 0.0230 for those 7989 data with I > 2.0sigma(I).  The absolute structure was 
assigned by refinement of the Flack parameter.
;
 
_refine_ls_structure_factor_coef  Fsqd 
_refine_ls_matrix_type            full 
_refine_ls_weighting_scheme       calc 
_refine_ls_weighting_details 
'w=1/[\s^2^(Fo^2^)+(0.0276P)^2^+0.2481P] where P=(Fo^2^+2Fc^2^)/3' 
_atom_sites_solution_primary      direct 
_atom_sites_solution_secondary    difmap 
_atom_sites_solution_hydrogens    difmap 
_refine_ls_hydrogen_treatment     refxyz 
_refine_ls_extinction_method      none 
_refine_ls_extinction_coef        ? 
_refine_ls_abs_structure_details 
; 
 Flack x determined using 3366 quotients [(I+)-(I-)]/[(I+)+(I-)] 
 (Parsons, Flack and Wagner, Acta Cryst. B69 (2013) 249-259). 
; 
_refine_ls_abs_structure_Flack    -0.012(2) 
_chemical_absolute_configuration  ad 
_refine_ls_number_reflns          8341 
_refine_ls_number_parameters      565 
_refine_ls_number_restraints      1 
_refine_ls_R_factor_all           0.0250 
_refine_ls_R_factor_gt            0.0230 
_refine_ls_wR_factor_ref          0.0514 
_refine_ls_wR_factor_gt           0.0507 
_refine_ls_goodness_of_fit_ref    1.051 
_refine_ls_restrained_S_all       1.051 
_refine_ls_shift/su_max           0.002 
_refine_ls_shift/su_mean          0.000 
  
loop_ 
 _atom_site_label 
 _atom_site_type_symbol 
 _atom_site_fract_x 
 _atom_site_fract_y 
 _atom_site_fract_z 
 _atom_site_U_iso_or_equiv 
 _atom_site_adp_type 
 _atom_site_occupancy 
 _atom_site_site_symmetry_order 
 _atom_site_calc_flag 
 _atom_site_refinement_flags_posn 
 _atom_site_refinement_flags_adp 
 _atom_site_refinement_flags_occupancy 
 _atom_site_disorder_assembly 
 _atom_site_disorder_group 
Br1 Br -0.24479(2) 0.97296(4) 0.18249(2) 0.02195(6) Uani 1 1 d . . . . . 
O1 O -0.45551(10) 0.5098(3) -0.10564(8) 0.0160(4) Uani 1 1 d . . . . . 
O2 O -0.47416(13) 0.8715(3) -0.13778(9) 0.0257(4) Uani 1 1 d . . . . . 
C1 C -0.31932(17) 0.3610(4) -0.18683(12) 0.0178(5) Uani 1 1 d . . . . . 
H1A H -0.3231(19) 0.204(5) -0.1766(14) 0.021 Uiso 1 1 d . U . . . 
C2 C -0.25041(16) 0.4903(5) -0.13744(12) 0.0182(5) Uani 1 1 d . . . . . 
H2A H -0.268(2) 0.641(6) -0.1312(14) 0.022 Uiso 1 1 d . U . . . 
C3 C -0.23099(18) 0.4428(6) -0.20740(13) 0.0247(6) Uani 1 1 d . . . . . 
H3A H -0.232(2) 0.567(6) -0.2375(15) 0.030 Uiso 1 1 d . U . . . 
H3B H -0.188(2) 0.331(6) -0.2125(15) 0.030 Uiso 1 1 d . U . . . 
C4 C -0.40862(16) 0.4720(5) -0.21595(12) 0.0186(5) Uani 1 1 d . . . . . 
H4A H -0.4301(19) 0.410(5) -0.2593(14) 0.022 Uiso 1 1 d . U . . . 
H4B H -0.3965(19) 0.629(6) -0.2192(14) 0.022 Uiso 1 1 d . U . . . 
C5 C -0.48498(16) 0.4374(4) -0.17433(12) 0.0171(5) Uani 1 1 d . . . . . 
H5A H -0.5398(18) 0.512(5) -0.1928(13) 0.021 Uiso 1 1 d . U . . . 
H5B H -0.496(2) 0.282(5) -0.1686(14) 0.021 Uiso 1 1 d . U . . . 
C6 C -0.44873(16) 0.7317(4) -0.09569(12) 0.0163(5) Uani 1 1 d . . . . . 
C7 C -0.40360(15) 0.7871(4) -0.02659(12) 0.0141(5) Uani 1 1 d . . . . . 
C8 C -0.36731(16) 1.0027(4) -0.01463(12) 0.0170(5) Uani 1 1 d . . . . . 
H8A H -0.3733(19) 1.108(5) -0.0458(14) 0.020 Uiso 1 1 d . U . . . 
C9 C -0.31932(16) 1.0558(5) 0.04779(12) 0.0179(5) Uani 1 1 d . . . . . 
H9A H -0.294(2) 1.187(5) 0.0566(14) 0.022 Uiso 1 1 d . U . . . 
C10 C -0.31111(16) 0.8951(4) 0.09768(12) 0.0164(5) Uani 1 1 d . . . . . 
C11 C -0.34861(17) 0.6833(4) 0.08739(12) 0.0165(5) Uani 1 1 d . . . . . 
H11A H -0.3420(18) 0.576(5) 0.1226(13) 0.020 Uiso 1 1 d . U . . . 
C12 C -0.39446(16) 0.6290(4) 0.02437(12) 0.0154(5) Uani 1 1 d . . . . . 
H12A H -0.4211(17) 0.479(6) 0.0171(13) 0.019 Uiso 1 1 d . U . . . 
C13 C -0.19662(15) 0.3771(4) -0.07873(12) 0.0159(5) Uani 1 1 d . . . . . 
C14 C -0.15994(17) 0.1573(4) -0.08371(13) 0.0184(5) Uani 1 1 d . . . . . 
H14A H -0.1731(19) 0.091(5) -0.1223(14) 0.022 Uiso 1 1 d . U . . . 
C15 C -0.10665(15) 0.0584(5) -0.03103(13) 0.0185(5) Uani 1 1 d . . . . . 
H15A H -0.0810(19) -0.085(6) -0.0359(14) 0.022 Uiso 1 1 d . U . . . 
C16 C -0.08607(16) 0.1701(4) 0.03114(13) 0.0164(5) Uani 1 1 d . . . . . 
C17 C -0.02746(16) 0.0759(5) 0.08602(13) 0.0203(5) Uani 1 1 d . . . . . 
H17A H -0.002(2) -0.069(6) 0.0809(14) 0.024 Uiso 1 1 d . U . . . 
C18 C -0.00734(18) 0.1913(5) 0.14448(14) 0.0237(6) Uani 1 1 d . . . . . 
H18A H 0.032(2) 0.125(6) 0.1790(15) 0.028 Uiso 1 1 d . U . . . 
C19 C -0.04641(18) 0.4047(5) 0.15148(13) 0.0231(6) Uani 1 1 d . . . . . 
H19A H -0.0340(19) 0.486(6) 0.1910(14) 0.028 Uiso 1 1 d . U . . . 
C20 C -0.10341(16) 0.5008(4) 0.09949(12) 0.0185(5) Uani 1 1 d . . . . . 
H20A H -0.128(2) 0.641(6) 0.1054(14) 0.022 Uiso 1 1 d . U . . . 
C21 C -0.12401(15) 0.3884(4) 0.03753(12) 0.0148(5) Uani 1 1 d . . . . . 
C22 C -0.17954(14) 0.4860(4) -0.01855(11) 0.0152(4) Uani 1 1 d . . . . . 
H22A H -0.2049(18) 0.643(5) -0.0137(13) 0.018 Uiso 1 1 d . U . . . 
Br2 Br 0.31275(2) 0.54601(5) -0.67239(2) 0.02902(8) Uani 1 1 d . . . . . 
O3 O 0.42366(11) 0.0146(3) -0.37557(8) 0.0153(3) Uani 1 1 d . . . . . 
O4 O 0.41780(13) 0.3666(3) -0.33557(9) 0.0235(4) Uani 1 1 d . . . . . 
C23 C 0.26687(16) -0.1634(4) -0.31784(12) 0.0162(5) Uani 1 1 d . . . . . 
H23A H 0.2758(19) -0.316(5) -0.3341(14) 0.019 Uiso 1 1 d . U . . . 
C24 C 0.20512(15) -0.0102(5) -0.36558(11) 0.0164(5) Uani 1 1 d . . . . . 
H24A H 0.2256(19) 0.143(5) -0.3611(14) 0.020 Uiso 1 1 d . U . . . 
C25 C 0.17277(18) -0.1015(5) -0.30318(13) 0.0211(5) Uani 1 1 d . . . . . 
H25A H 0.1686(18) 0.002(5) -0.2676(14) 0.025 Uiso 1 1 d . U . . . 
H25B H 0.127(2) -0.211(6) -0.3084(15) 0.025 Uiso 1 1 d . U . . . 
C26 C 0.35055(17) -0.0637(4) -0.27569(12) 0.0170(5) Uani 1 1 d . . . . . 
H26A H 0.3661(19) -0.151(5) -0.2342(14) 0.020 Uiso 1 1 d . U . . . 
H26B H 0.3391(19) 0.091(5) -0.2660(13) 0.020 Uiso 1 1 d . U . . . 
C27 C 0.43748(17) -0.0745(4) -0.30767(12) 0.0167(5) Uani 1 1 d . . . . . 
H27A H 0.4868(18) 0.021(5) -0.2828(13) 0.020 Uiso 1 1 d . U . . . 
H27B H 0.452(2) -0.219(5) -0.3144(14) 0.020 Uiso 1 1 d . U . . . 
C28 C 0.41376(16) 0.2375(4) -0.38181(13) 0.0159(5) Uani 1 1 d . . . . . 
C29 C 0.39423(16) 0.3087(4) -0.45312(12) 0.0153(5) Uani 1 1 d . . . . . 
C30 C 0.35623(15) 0.5208(4) -0.46697(12) 0.0168(5) Uani 1 1 d . . . . . 
H30A H 0.3460(19) 0.623(5) -0.4329(14) 0.020 Uiso 1 1 d . U . . . 
C31 C 0.33144(16) 0.5905(4) -0.53256(13) 0.0196(5) Uani 1 1 d . . . . . 
H31A H 0.301(2) 0.730(5) -0.5413(14) 0.024 Uiso 1 1 d . U . . . 
C32 C 0.34758(16) 0.4479(5) -0.58328(12) 0.0193(5) Uani 1 1 d . . . . . 
C33 C 0.38764(18) 0.2384(5) -0.57046(13) 0.0209(5) Uani 1 1 d . . . . . 
H33A H 0.400(2) 0.148(5) -0.6059(15) 0.025 Uiso 1 1 d . U . . . 
C34 C 0.41002(16) 0.1680(4) -0.50483(13) 0.0185(5) Uani 1 1 d . . . . . 
H34A H 0.4371(18) 0.018(5) -0.4960(13) 0.022 Uiso 1 1 d . U . . . 
C35 C 0.16331(15) -0.0833(4) -0.43349(12) 0.0151(5) Uani 1 1 d . . . . . 
C36 C 0.11964(17) -0.2954(4) -0.44591(12) 0.0168(5) Uani 1 1 d . . . . . 
H36A H 0.1167(19) -0.396(5) -0.4115(14) 0.020 Uiso 1 1 d . U . . . 
C37 C 0.07868(16) -0.3551(4) -0.50841(12) 0.0165(5) Uani 1 1 d . . . . . 
H37A H 0.0505(18) -0.501(5) -0.5149(13) 0.020 Uiso 1 1 d . U . . . 
C38 C 0.07858(16) -0.2081(4) -0.56321(12) 0.0146(5) Uani 1 1 d . . . . . 
C39 C 0.03262(18) -0.2594(5) -0.62838(13) 0.0207(5) Uani 1 1 d . . . . . 
H39A H 0.001(2) -0.393(6) -0.6331(14) 0.025 Uiso 1 1 d . U . . . 
C40 C 0.03224(19) -0.1093(5) -0.67931(13) 0.0232(5) Uani 1 1 d . . . . . 
H40A H 0.002(2) -0.153(5) -0.7229(15) 0.028 Uiso 1 1 d . U . . . 
C41 C 0.07813(18) 0.0983(5) -0.66815(12) 0.0220(6) Uani 1 1 d . . . . . 
H41A H 0.080(2) 0.201(5) -0.7036(15) 0.026 Uiso 1 1 d . U . . . 
C42 C 0.12304(17) 0.1536(4) -0.60626(12) 0.0178(5) Uani 1 1 d . . . . . 
H42A H 0.154(2) 0.299(5) -0.5984(14) 0.021 Uiso 1 1 d . U . . . 
C43 C 0.12360(14) 0.0040(4) -0.55215(11) 0.0148(5) Uani 1 1 d . . . . . 
C44 C 0.16548(15) 0.0611(4) -0.48651(11) 0.0147(4) Uani 1 1 d . . . . . 
H44A H 0.1953(19) 0.203(5) -0.4786(13) 0.018 Uiso 1 1 d . U . . . 
  
loop_ 
 _atom_site_aniso_label 
 _atom_site_aniso_U_11 
 _atom_site_aniso_U_22 
 _atom_site_aniso_U_33 
 _atom_site_aniso_U_23 
 _atom_site_aniso_U_13 
 _atom_site_aniso_U_12 
Br1 0.02180(12) 0.02451(13) 0.01915(12) -0.00751(10) 0.00187(9) -0.00301(10) 
O1 0.0166(7) 0.0156(10) 0.0154(8) -0.0005(6) 0.0017(6) 0.0002(6) 
O2 0.0342(11) 0.0182(9) 0.0217(10) 0.0022(8) -0.0045(8) 0.0064(8) 
C1 0.0165(12) 0.0203(13) 0.0168(12) -0.0022(10) 0.0028(9) -0.0006(10) 
C2 0.0154(10) 0.0190(13) 0.0197(11) 0.0003(11) 0.0014(9) 0.0008(10) 
C3 0.0172(12) 0.0368(17) 0.0208(13) 0.0013(13) 0.0055(10) -0.0010(12) 
C4 0.0173(11) 0.0220(12) 0.0155(11) -0.0002(11) -0.0004(9) -0.0015(11) 
C5 0.0157(11) 0.0172(14) 0.0171(11) -0.0017(10) -0.0015(9) -0.0003(9) 
C6 0.0137(11) 0.0159(12) 0.0196(12) -0.0004(10) 0.0041(9) 0.0026(9) 
C7 0.0095(10) 0.0146(11) 0.0181(12) -0.0021(9) 0.0023(9) 0.0005(9) 
C8 0.0180(11) 0.0126(13) 0.0215(11) 0.0019(9) 0.0062(9) 0.0012(9) 
C9 0.0156(11) 0.0129(10) 0.0265(12) -0.0034(10) 0.0069(9) -0.0034(10) 
C10 0.0129(11) 0.0209(12) 0.0160(11) -0.0069(9) 0.0042(9) 0.0005(9) 
C11 0.0163(11) 0.0165(12) 0.0176(12) 0.0006(10) 0.0053(9) 0.0005(9) 
C12 0.0146(11) 0.0142(11) 0.0183(12) -0.0020(9) 0.0055(9) -0.0009(9) 
C13 0.0083(10) 0.0179(11) 0.0214(12) -0.0003(10) 0.0022(9) -0.0013(9) 
C14 0.0140(11) 0.0188(13) 0.0230(13) -0.0075(10) 0.0043(10) -0.0028(9) 
C15 0.0127(11) 0.0132(11) 0.0309(13) -0.0026(11) 0.0075(9) -0.0012(10) 
C16 0.0104(11) 0.0150(12) 0.0247(13) 0.0026(10) 0.0058(9) -0.0020(9) 
C17 0.0149(11) 0.0186(13) 0.0286(13) 0.0066(11) 0.0068(10) 0.0009(10) 
C18 0.0164(12) 0.0330(15) 0.0219(13) 0.0102(11) 0.0030(10) 0.0010(11) 
C19 0.0206(13) 0.0338(15) 0.0154(12) -0.0022(11) 0.0045(10) -0.0018(11) 
C20 0.0150(10) 0.0202(14) 0.0212(11) -0.0017(10) 0.0062(9) -0.0016(10) 
C21 0.0091(10) 0.0150(11) 0.0211(12) 0.0007(9) 0.0051(9) -0.0016(9) 
C22 0.0116(10) 0.0132(11) 0.0213(11) -0.0013(10) 0.0044(8) -0.0023(9) 
Br2 0.03047(14) 0.03796(16) 0.01851(12) 0.01051(11) 0.00338(10) 0.00063(12) 
O3 0.0180(8) 0.0123(9) 0.0157(7) 0.0014(6) 0.0028(6) 0.0003(6) 
O4 0.0332(11) 0.0161(9) 0.0187(9) -0.0011(7) -0.0035(8) -0.0004(8) 
C23 0.0158(12) 0.0188(13) 0.0137(11) 0.0025(9) 0.0010(9) 0.0002(9) 
C24 0.0161(10) 0.0170(13) 0.0148(10) 0.0012(10) -0.0012(8) 0.0013(10) 
C25 0.0164(12) 0.0311(14) 0.0159(12) 0.0015(11) 0.0025(10) 0.0012(10) 
C26 0.0188(11) 0.0181(14) 0.0131(11) 0.0023(9) -0.0010(9) 0.0008(9) 
C27 0.0169(11) 0.0145(14) 0.0173(12) 0.0013(9) -0.0023(9) 0.0002(9) 
C28 0.0107(11) 0.0152(12) 0.0213(12) 0.0005(10) 0.0004(9) -0.0012(9) 
C29 0.0126(11) 0.0147(11) 0.0187(12) 0.0009(9) 0.0029(9) -0.0027(9) 
C30 0.0153(11) 0.0145(13) 0.0203(11) -0.0007(9) 0.0022(9) -0.0014(9) 
C31 0.0148(11) 0.0169(13) 0.0263(13) 0.0055(10) 0.0006(10) 0.0009(9) 
C32 0.0172(11) 0.0236(13) 0.0167(11) 0.0074(10) 0.0021(9) -0.0041(10) 
C33 0.0212(13) 0.0218(13) 0.0206(13) -0.0015(11) 0.0059(10) -0.0017(10) 
C34 0.0148(11) 0.0167(13) 0.0245(13) 0.0011(10) 0.0042(10) -0.0002(9) 
C35 0.0115(10) 0.0177(13) 0.0156(11) 0.0009(9) 0.0008(9) 0.0026(8) 
C36 0.0159(12) 0.0163(12) 0.0184(12) 0.0047(10) 0.0034(9) 0.0031(9) 
C37 0.0129(11) 0.0140(11) 0.0229(13) 0.0007(10) 0.0034(9) 0.0010(9) 
C38 0.0102(10) 0.0165(12) 0.0173(12) -0.0017(9) 0.0024(9) 0.0014(9) 
C39 0.0187(12) 0.0199(13) 0.0227(13) -0.0051(10) 0.0013(10) -0.0013(10) 
C40 0.0243(13) 0.0294(14) 0.0152(12) -0.0036(11) 0.0009(10) 0.0016(11) 
C41 0.0272(14) 0.0238(15) 0.0155(12) 0.0026(10) 0.0053(10) 0.0016(10) 
C42 0.0170(12) 0.0188(12) 0.0178(12) 0.0013(10) 0.0037(9) 0.0000(10) 
C43 0.0108(9) 0.0179(14) 0.0158(10) 0.0001(9) 0.0023(8) 0.0009(9) 
C44 0.0114(10) 0.0142(11) 0.0183(11) 0.0010(10) 0.0014(8) -0.0004(9) 
  
_geom_special_details 
; 
 All esds (except the esd in the dihedral angle between two l.s. planes) 
 are estimated using the full covariance matrix.  The cell esds are taken 
 into account individually in the estimation of esds in distances, angles 
 and torsion angles; correlations between esds in cell parameters are only 
 used when they are defined by crystal symmetry.  An approximate (isotropic) 
 treatment of cell esds is used for estimating esds involving l.s. planes. 
; 
  
loop_ 
 _geom_bond_atom_site_label_1 
 _geom_bond_atom_site_label_2 
 _geom_bond_distance 
 _geom_bond_site_symmetry_2 
 _geom_bond_publ_flag 
Br1 C10 1.902(2) . ? 
O1 C6 1.337(3) . ? 
O1 C5 1.461(3) . ? 
O2 C6 1.210(3) . ? 
C1 C3 1.504(3) . ? 
C1 C4 1.506(3) . ? 
C1 C2 1.520(3) . ? 
C2 C13 1.486(3) . ? 
C2 C3 1.519(4) . ? 
C4 C5 1.520(3) . ? 
C6 C7 1.494(3) . ? 
C7 C12 1.390(3) . ? 
C7 C8 1.395(3) . ? 
C8 C9 1.389(3) . ? 
C9 C10 1.385(4) . ? 
C10 C11 1.378(4) . ? 
C11 C12 1.390(3) . ? 
C13 C22 1.372(3) . ? 
C13 C14 1.424(4) . ? 
C14 C15 1.359(4) . ? 
C15 C16 1.418(4) . ? 
C16 C17 1.415(3) . ? 
C16 C21 1.426(3) . ? 
C17 C18 1.364(4) . ? 
C18 C19 1.409(4) . ? 
C19 C20 1.368(4) . ? 
C20 C21 1.417(3) . ? 
C21 C22 1.419(3) . ? 
Br2 C32 1.897(2) . ? 
O3 C28 1.337(3) . ? 
O3 C27 1.463(3) . ? 
O4 C28 1.208(3) . ? 
C23 C25 1.504(3) . ? 
C23 C26 1.507(3) . ? 
C23 C24 1.524(3) . ? 
C24 C35 1.486(3) . ? 
C24 C25 1.522(4) . ? 
C26 C27 1.521(3) . ? 
C28 C29 1.494(3) . ? 
C29 C34 1.391(4) . ? 
C29 C30 1.391(3) . ? 
C30 C31 1.390(3) . ? 
C31 C32 1.383(4) . ? 
C32 C33 1.385(4) . ? 
C33 C34 1.388(4) . ? 
C35 C44 1.382(3) . ? 
C35 C36 1.420(3) . ? 
C36 C37 1.366(4) . ? 
C37 C38 1.416(3) . ? 
C38 C39 1.424(3) . ? 
C38 C43 1.426(3) . ? 
C39 C40 1.366(4) . ? 
C40 C41 1.408(4) . ? 
C41 C42 1.367(4) . ? 
C42 C43 1.414(3) . ? 
C43 C44 1.421(3) . ? 
  
loop_ 
 _geom_angle_atom_site_label_1 
 _geom_angle_atom_site_label_2 
 _geom_angle_atom_site_label_3 
 _geom_angle 
 _geom_angle_site_symmetry_1 
 _geom_angle_site_symmetry_3 
 _geom_angle_publ_flag 
C6 O1 C5 116.07(19) . . ? 
C3 C1 C4 119.1(2) . . ? 
C3 C1 C2 60.33(16) . . ? 
C4 C1 C2 119.3(2) . . ? 
C13 C2 C3 120.9(2) . . ? 
C13 C2 C1 121.2(2) . . ? 
C3 C2 C1 59.33(16) . . ? 
C1 C3 C2 60.34(16) . . ? 
C1 C4 C5 113.3(2) . . ? 
O1 C5 C4 110.91(19) . . ? 
O2 C6 O1 124.3(2) . . ? 
O2 C6 C7 123.8(2) . . ? 
O1 C6 C7 111.8(2) . . ? 
C12 C7 C8 120.1(2) . . ? 
C12 C7 C6 121.9(2) . . ? 
C8 C7 C6 117.9(2) . . ? 
C9 C8 C7 119.6(2) . . ? 
C10 C9 C8 119.1(2) . . ? 
C11 C10 C9 122.2(2) . . ? 
C11 C10 Br1 119.80(19) . . ? 
C9 C10 Br1 118.04(19) . . ? 
C10 C11 C12 118.5(2) . . ? 
C11 C12 C7 120.5(2) . . ? 
C22 C13 C14 118.5(2) . . ? 
C22 C13 C2 120.2(2) . . ? 
C14 C13 C2 121.2(2) . . ? 
C15 C14 C13 121.3(2) . . ? 
C14 C15 C16 121.1(2) . . ? 
C17 C16 C15 122.5(2) . . ? 
C17 C16 C21 119.2(2) . . ? 
C15 C16 C21 118.4(2) . . ? 
C18 C17 C16 120.7(3) . . ? 
C17 C18 C19 120.3(3) . . ? 
C20 C19 C18 120.6(3) . . ? 
C19 C20 C21 120.7(2) . . ? 
C20 C21 C22 122.5(2) . . ? 
C20 C21 C16 118.5(2) . . ? 
C22 C21 C16 118.9(2) . . ? 
C13 C22 C21 121.7(2) . . ? 
C28 O3 C27 116.48(19) . . ? 
C25 C23 C26 119.0(2) . . ? 
C25 C23 C24 60.34(16) . . ? 
C26 C23 C24 118.7(2) . . ? 
C35 C24 C25 122.2(2) . . ? 
C35 C24 C23 122.5(2) . . ? 
C25 C24 C23 59.18(16) . . ? 
C23 C25 C24 60.47(16) . . ? 
C23 C26 C27 113.9(2) . . ? 
O3 C27 C26 112.62(19) . . ? 
O4 C28 O3 124.4(2) . . ? 
O4 C28 C29 123.6(2) . . ? 
O3 C28 C29 112.0(2) . . ? 
C34 C29 C30 120.1(2) . . ? 
C34 C29 C28 122.2(2) . . ? 
C30 C29 C28 117.7(2) . . ? 
C31 C30 C29 120.1(2) . . ? 
C32 C31 C30 118.8(2) . . ? 
C31 C32 C33 121.9(2) . . ? 
C31 C32 Br2 118.1(2) . . ? 
C33 C32 Br2 120.0(2) . . ? 
C32 C33 C34 118.9(2) . . ? 
C33 C34 C29 120.2(2) . . ? 
C44 C35 C36 118.5(2) . . ? 
C44 C35 C24 119.1(2) . . ? 
C36 C35 C24 122.4(2) . . ? 
C37 C36 C35 121.2(2) . . ? 
C36 C37 C38 121.2(2) . . ? 
C37 C38 C39 122.8(2) . . ? 
C37 C38 C43 118.6(2) . . ? 
C39 C38 C43 118.5(2) . . ? 
C40 C39 C38 120.7(2) . . ? 
C39 C40 C41 120.3(2) . . ? 
C42 C41 C40 120.7(2) . . ? 
C41 C42 C43 120.6(2) . . ? 
C42 C43 C44 122.0(2) . . ? 
C42 C43 C38 119.2(2) . . ? 
C44 C43 C38 118.8(2) . . ? 
C35 C44 C43 121.6(2) . . ? 
  
loop_ 
 _geom_torsion_atom_site_label_1 
 _geom_torsion_atom_site_label_2 
 _geom_torsion_atom_site_label_3 
 _geom_torsion_atom_site_label_4 
 _geom_torsion 
 _geom_torsion_site_symmetry_1 
 _geom_torsion_site_symmetry_2 
 _geom_torsion_site_symmetry_3 
 _geom_torsion_site_symmetry_4 
 _geom_torsion_publ_flag 
C3 C1 C2 C13 -109.8(3) . . . . ? 
C4 C1 C2 C13 141.4(2) . . . . ? 
C4 C1 C2 C3 -108.7(3) . . . . ? 
C4 C1 C3 C2 109.1(3) . . . . ? 
C13 C2 C3 C1 110.3(3) . . . . ? 
C3 C1 C4 C5 -158.9(2) . . . . ? 
C2 C1 C4 C5 -88.6(3) . . . . ? 
C6 O1 C5 C4 72.7(3) . . . . ? 
C1 C4 C5 O1 54.4(3) . . . . ? 
C5 O1 C6 O2 8.0(3) . . . . ? 
C5 O1 C6 C7 -170.55(18) . . . . ? 
O2 C6 C7 C12 165.0(2) . . . . ? 
O1 C6 C7 C12 -16.5(3) . . . . ? 
O2 C6 C7 C8 -17.2(4) . . . . ? 
O1 C6 C7 C8 161.3(2) . . . . ? 
C12 C7 C8 C9 2.2(3) . . . . ? 
C6 C7 C8 C9 -175.6(2) . . . . ? 
C7 C8 C9 C10 -2.1(3) . . . . ? 
C8 C9 C10 C11 0.3(4) . . . . ? 
C8 C9 C10 Br1 179.87(17) . . . . ? 
C9 C10 C11 C12 1.3(4) . . . . ? 
Br1 C10 C11 C12 -178.20(18) . . . . ? 
C10 C11 C12 C7 -1.2(4) . . . . ? 
C8 C7 C12 C11 -0.5(4) . . . . ? 
C6 C7 C12 C11 177.2(2) . . . . ? 
C3 C2 C13 C22 147.9(2) . . . . ? 
C1 C2 C13 C22 -141.5(2) . . . . ? 
C3 C2 C13 C14 -30.6(3) . . . . ? 
C1 C2 C13 C14 40.0(3) . . . . ? 
C22 C13 C14 C15 -2.1(3) . . . . ? 
C2 C13 C14 C15 176.4(2) . . . . ? 
C13 C14 C15 C16 0.4(4) . . . . ? 
C14 C15 C16 C17 -177.1(2) . . . . ? 
C14 C15 C16 C21 1.0(3) . . . . ? 
C15 C16 C17 C18 178.2(2) . . . . ? 
C21 C16 C17 C18 0.1(3) . . . . ? 
C16 C17 C18 C19 1.4(4) . . . . ? 
C17 C18 C19 C20 -1.3(4) . . . . ? 
C18 C19 C20 C21 -0.3(4) . . . . ? 
C19 C20 C21 C22 -177.2(2) . . . . ? 
C19 C20 C21 C16 1.7(3) . . . . ? 
C17 C16 C21 C20 -1.6(3) . . . . ? 
C15 C16 C21 C20 -179.8(2) . . . . ? 
C17 C16 C21 C22 177.3(2) . . . . ? 
C15 C16 C21 C22 -0.9(3) . . . . ? 
C14 C13 C22 C21 2.2(3) . . . . ? 
C2 C13 C22 C21 -176.3(2) . . . . ? 
C20 C21 C22 C13 178.1(2) . . . . ? 
C16 C21 C22 C13 -0.8(3) . . . . ? 
C25 C23 C24 C35 -110.8(3) . . . . ? 
C26 C23 C24 C35 140.2(2) . . . . ? 
C26 C23 C24 C25 -109.0(3) . . . . ? 
C26 C23 C25 C24 108.4(3) . . . . ? 
C35 C24 C25 C23 111.3(3) . . . . ? 
C25 C23 C26 C27 -161.1(2) . . . . ? 
C24 C23 C26 C27 -91.1(3) . . . . ? 
C28 O3 C27 C26 71.7(3) . . . . ? 
C23 C26 C27 O3 50.9(3) . . . . ? 
C27 O3 C28 O4 1.9(3) . . . . ? 
C27 O3 C28 C29 -176.43(18) . . . . ? 
O4 C28 C29 C34 165.3(2) . . . . ? 
O3 C28 C29 C34 -16.4(3) . . . . ? 
O4 C28 C29 C30 -16.8(4) . . . . ? 
O3 C28 C29 C30 161.5(2) . . . . ? 
C34 C29 C30 C31 1.9(3) . . . . ? 
C28 C29 C30 C31 -176.1(2) . . . . ? 
C29 C30 C31 C32 -1.7(3) . . . . ? 
C30 C31 C32 C33 0.0(4) . . . . ? 
C30 C31 C32 Br2 179.76(17) . . . . ? 
C31 C32 C33 C34 1.6(4) . . . . ? 
Br2 C32 C33 C34 -178.14(19) . . . . ? 
C32 C33 C34 C29 -1.5(4) . . . . ? 
C30 C29 C34 C33 -0.2(4) . . . . ? 
C28 C29 C34 C33 177.6(2) . . . . ? 
C25 C24 C35 C44 153.2(2) . . . . ? 
C23 C24 C35 C44 -135.3(2) . . . . ? 
C25 C24 C35 C36 -25.7(3) . . . . ? 
C23 C24 C35 C36 45.8(3) . . . . ? 
C44 C35 C36 C37 -1.4(3) . . . . ? 
C24 C35 C36 C37 177.5(2) . . . . ? 
C35 C36 C37 C38 0.3(4) . . . . ? 
C36 C37 C38 C39 -176.7(2) . . . . ? 
C36 C37 C38 C43 0.9(3) . . . . ? 
C37 C38 C39 C40 178.1(2) . . . . ? 
C43 C38 C39 C40 0.5(4) . . . . ? 
C38 C39 C40 C41 0.5(4) . . . . ? 
C39 C40 C41 C42 -0.5(4) . . . . ? 
C40 C41 C42 C43 -0.5(4) . . . . ? 
C41 C42 C43 C44 -176.6(2) . . . . ? 
C41 C42 C43 C38 1.5(4) . . . . ? 
C37 C38 C43 C42 -179.2(2) . . . . ? 
C39 C38 C43 C42 -1.5(3) . . . . ? 
C37 C38 C43 C44 -1.0(3) . . . . ? 
C39 C38 C43 C44 176.8(2) . . . . ? 
C36 C35 C44 C43 1.4(3) . . . . ? 
C24 C35 C44 C43 -177.6(2) . . . . ? 
C42 C43 C44 C35 178.0(2) . . . . ? 
C38 C43 C44 C35 -0.2(3) . . . . ? 
  
_refine_diff_density_max    0.419 
_refine_diff_density_min   -0.195 
_refine_diff_density_rms    0.051 
  
_shelx_res_file 
; 
  
    erj27.res created by SHELXL-2014/7 
  
  
TITL erj27 in P2(1) 
CELL 0.71073  14.68940   5.94720  20.32560  90.0000  98.8906  90.0000 
ZERR    4.00   0.00080   0.00030   0.00110   0.0000   0.0007   0.0000 
LATT -1 
SYMM -X, 0.5+Y, -Z 
SFAC C H O BR 
UNIT 88 76 8 4 
TEMP -140.000 
SIZE 0.126 0.279 0.528 
  
L.S. 10 
FMAP 2 
PLAN 10 
CONF 
  
ACTA 51 
  
WGHT    0.027600    0.248100 
FVAR       0.08642 
BR1   4   -0.244788    0.972957    0.182492    11.00000    0.02180    0.02451 = 
         0.01915   -0.00751    0.00187   -0.00301 
O1    3   -0.455510    0.509761   -0.105644    11.00000    0.01662    0.01562 = 
         0.01539   -0.00054    0.00167    0.00016 
O2    3   -0.474157    0.871524   -0.137776    11.00000    0.03423    0.01821 = 
         0.02175    0.00220   -0.00447    0.00644 
C1    1   -0.319319    0.361008   -0.186826    11.00000    0.01647    0.02026 = 
         0.01679   -0.00220    0.00282   -0.00059 
H1A   2   -0.323129    0.203660   -0.176594    11.00000   -1.20000 
C2    1   -0.250413    0.490284   -0.137440    11.00000    0.01543    0.01896 = 
         0.01974    0.00028    0.00143    0.00077 
H2A   2   -0.268292    0.640560   -0.131160    11.00000   -1.20000 
C3    1   -0.230994    0.442776   -0.207396    11.00000    0.01721    0.03681 = 
         0.02082    0.00126    0.00547   -0.00099 
H3A   2   -0.232302    0.566678   -0.237477    11.00000   -1.20000 
H3B   2   -0.187572    0.331217   -0.212457    11.00000   -1.20000 
C4    1   -0.408625    0.471954   -0.215950    11.00000    0.01733    0.02198 = 
         0.01546   -0.00021   -0.00045   -0.00150 
H4A   2   -0.430122    0.410466   -0.259342    11.00000   -1.20000 
H4B   2   -0.396469    0.629332   -0.219235    11.00000   -1.20000 
C5    1   -0.484983    0.437415   -0.174331    11.00000    0.01574    0.01716 = 
         0.01708   -0.00167   -0.00151   -0.00029 
H5A   2   -0.539777    0.512378   -0.192802    11.00000   -1.20000 
H5B   2   -0.496423    0.281982   -0.168645    11.00000   -1.20000 
C6    1   -0.448731    0.731749   -0.095687    11.00000    0.01371    0.01590 = 
         0.01963   -0.00039    0.00406    0.00264 
C7    1   -0.403604    0.787120   -0.026594    11.00000    0.00955    0.01463 = 
         0.01807   -0.00214    0.00233    0.00048 
C8    1   -0.367306    1.002676   -0.014633    11.00000    0.01800    0.01257 = 
         0.02150    0.00190    0.00619    0.00118 
H8A   2   -0.373345    1.107551   -0.045846    11.00000   -1.20000 
C9    1   -0.319321    1.055827    0.047792    11.00000    0.01563    0.01286 = 
         0.02646   -0.00341    0.00686   -0.00335 
H9A   2   -0.294139    1.186840    0.056572    11.00000   -1.20000 
C10   1   -0.311109    0.895123    0.097678    11.00000    0.01291    0.02086 = 
         0.01600   -0.00686    0.00420    0.00048 
C11   1   -0.348605    0.683253    0.087385    11.00000    0.01626    0.01650 = 
         0.01756    0.00063    0.00528    0.00049 
H11A  2   -0.342039    0.576161    0.122560    11.00000   -1.20000 
C12   1   -0.394463    0.629031    0.024365    11.00000    0.01461    0.01424 = 
         0.01833   -0.00199    0.00546   -0.00089 
H12A  2   -0.421100    0.478516    0.017147    11.00000   -1.20000 
C13   1   -0.196623    0.377148   -0.078732    11.00000    0.00829    0.01787 = 
         0.02142   -0.00029    0.00223   -0.00125 
C14   1   -0.159945    0.157321   -0.083710    11.00000    0.01402    0.01879 = 
         0.02299   -0.00751    0.00433   -0.00276 
H14A  2   -0.173148    0.090537   -0.122324    11.00000   -1.20000 
C15   1   -0.106650    0.058430   -0.031035    11.00000    0.01271    0.01320 = 
         0.03091   -0.00263    0.00754   -0.00119 
H15A  2   -0.080990   -0.084796   -0.035872    11.00000   -1.20000 
C16   1   -0.086069    0.170150    0.031141    11.00000    0.01044    0.01498 = 
         0.02469    0.00260    0.00581   -0.00204 
C17   1   -0.027462    0.075950    0.086016    11.00000    0.01486    0.01859 = 
         0.02859    0.00657    0.00676    0.00094 
H17A  2   -0.001895   -0.068578    0.080852    11.00000   -1.20000 
C18   1   -0.007339    0.191276    0.144485    11.00000    0.01635    0.03300 = 
         0.02186    0.01019    0.00298    0.00103 
H18A  2    0.032335    0.125411    0.179012    11.00000   -1.20000 
C19   1   -0.046410    0.404717    0.151478    11.00000    0.02060    0.03382 = 
         0.01541   -0.00221    0.00452   -0.00179 
H19A  2   -0.033950    0.485531    0.190969    11.00000   -1.20000 
C20   1   -0.103414    0.500844    0.099486    11.00000    0.01505    0.02024 = 
         0.02117   -0.00174    0.00621   -0.00160 
H20A  2   -0.127917    0.640795    0.105443    11.00000   -1.20000 
C21   1   -0.124015    0.388358    0.037530    11.00000    0.00909    0.01496 = 
         0.02111    0.00075    0.00511   -0.00158 
C22   1   -0.179536    0.486032   -0.018551    11.00000    0.01155    0.01317 = 
         0.02134   -0.00129    0.00444   -0.00234 
H22A  2   -0.204906    0.642939   -0.013677    11.00000   -1.20000 
BR2   4    0.312746    0.546014   -0.672395    11.00000    0.03047    0.03796 = 
         0.01851    0.01051    0.00338    0.00063 
O3    3    0.423662    0.014629   -0.375571    11.00000    0.01803    0.01226 = 
         0.01571    0.00141    0.00275    0.00033 
O4    3    0.417797    0.366634   -0.335569    11.00000    0.03323    0.01615 = 
         0.01865   -0.00113   -0.00352   -0.00039 
C23   1    0.266871   -0.163366   -0.317837    11.00000    0.01581    0.01880 = 
         0.01372    0.00254    0.00100    0.00019 
H23A  2    0.275828   -0.315581   -0.334104    11.00000   -1.20000 
C24   1    0.205120   -0.010222   -0.365585    11.00000    0.01614    0.01695 = 
         0.01485    0.00117   -0.00117    0.00133 
H24A  2    0.225574    0.142675   -0.361091    11.00000   -1.20000 
C25   1    0.172769   -0.101537   -0.303176    11.00000    0.01644    0.03108 = 
         0.01589    0.00148    0.00253    0.00116 
H25A  2    0.168638    0.001841   -0.267551    11.00000   -1.20000 
H25B  2    0.126859   -0.211098   -0.308441    11.00000   -1.20000 
C26   1    0.350545   -0.063719   -0.275689    11.00000    0.01884    0.01808 = 
         0.01307    0.00226   -0.00100    0.00080 
H26A  2    0.366125   -0.150673   -0.234210    11.00000   -1.20000 
H26B  2    0.339133    0.090809   -0.266009    11.00000   -1.20000 
C27   1    0.437482   -0.074522   -0.307675    11.00000    0.01687    0.01449 = 
         0.01727    0.00126   -0.00228    0.00019 
H27A  2    0.486797    0.021008   -0.282796    11.00000   -1.20000 
H27B  2    0.452199   -0.218565   -0.314379    11.00000   -1.20000 
C28   1    0.413755    0.237511   -0.381815    11.00000    0.01071    0.01518 = 
         0.02129    0.00051    0.00040   -0.00123 
C29   1    0.394227    0.308693   -0.453118    11.00000    0.01257    0.01467 = 
         0.01870    0.00093    0.00292   -0.00267 
C30   1    0.356228    0.520849   -0.466967    11.00000    0.01531    0.01450 = 
         0.02029   -0.00072    0.00220   -0.00139 
H30A  2    0.345987    0.623199   -0.432889    11.00000   -1.20000 
C31   1    0.331437    0.590484   -0.532560    11.00000    0.01478    0.01688 = 
         0.02631    0.00547    0.00060    0.00093 
H31A  2    0.301148    0.730128   -0.541325    11.00000   -1.20000 
C32   1    0.347576    0.447883   -0.583277    11.00000    0.01721    0.02363 = 
         0.01675    0.00745    0.00208   -0.00412 
C33   1    0.387640    0.238438   -0.570458    11.00000    0.02118    0.02177 = 
         0.02064   -0.00153    0.00592   -0.00172 
H33A  2    0.399736    0.147741   -0.605877    11.00000   -1.20000 
C34   1    0.410023    0.168005   -0.504835    11.00000    0.01478    0.01670 = 
         0.02450    0.00110    0.00416   -0.00024 
H34A  2    0.437069    0.018358   -0.496038    11.00000   -1.20000 
C35   1    0.163311   -0.083279   -0.433492    11.00000    0.01151    0.01773 = 
         0.01563    0.00088    0.00079    0.00263 
C36   1    0.119637   -0.295377   -0.445912    11.00000    0.01592    0.01626 = 
         0.01837    0.00471    0.00337    0.00306 
H36A  2    0.116674   -0.395547   -0.411455    11.00000   -1.20000 
C37   1    0.078676   -0.355086   -0.508406    11.00000    0.01288    0.01398 = 
         0.02292    0.00068    0.00336    0.00103 
H37A  2    0.050466   -0.500777   -0.514882    11.00000   -1.20000 
C38   1    0.078576   -0.208122   -0.563208    11.00000    0.01024    0.01648 = 
         0.01730   -0.00172    0.00239    0.00140 
C39   1    0.032622   -0.259422   -0.628376    11.00000    0.01871    0.01994 = 
         0.02269   -0.00514    0.00127   -0.00130 
H39A  2    0.001289   -0.393332   -0.633107    11.00000   -1.20000 
C40   1    0.032237   -0.109297   -0.679315    11.00000    0.02431    0.02941 = 
         0.01523   -0.00358    0.00087    0.00157 
H40A  2    0.002217   -0.152945   -0.722911    11.00000   -1.20000 
C41   1    0.078127    0.098327   -0.668146    11.00000    0.02723    0.02380 = 
         0.01549    0.00258    0.00529    0.00155 
H41A  2    0.079542    0.200852   -0.703582    11.00000   -1.20000 
C42   1    0.123044    0.153567   -0.606264    11.00000    0.01696    0.01878 = 
         0.01785    0.00135    0.00372   -0.00001 
H42A  2    0.153571    0.299213   -0.598362    11.00000   -1.20000 
C43   1    0.123598    0.003958   -0.552153    11.00000    0.01075    0.01786 = 
         0.01578    0.00005    0.00234    0.00089 
C44   1    0.165481    0.061094   -0.486508    11.00000    0.01138    0.01421 = 
         0.01832    0.00098    0.00144   -0.00045 
H44A  2    0.195258    0.202899   -0.478571    11.00000   -1.20000 
HKLF 4 
  
REM  erj27 in P2(1) 
REM R1 =  0.0230 for    7989 Fo > 4sig(Fo)  and  0.0250 for all    8341 data 
REM    565 parameters refined using      1 restraints 
  
END 
  
WGHT      0.0273      0.2539 
  
REM Highest difference peak  0.419,  deepest hole -0.195,  1-sigma level  0.051 
Q1    1   0.2571  0.5371 -0.6735  11.00000  0.05    0.42 
Q2    1  -0.1793  0.9868  0.1796  11.00000  0.05    0.40 
Q3    1  -0.2470  0.9696  0.2259  11.00000  0.05    0.37 
Q4    1  -0.3086  0.9918  0.1833  11.00000  0.05    0.36 
Q5    1  -0.2473  0.9413  0.1383  11.00000  0.05    0.36 
Q6    1   0.3301  0.4784 -0.6285  11.00000  0.05    0.32 
Q7    1   0.3839  0.5244 -0.6735  11.00000  0.05    0.31 
Q8    1   0.3117  0.5861 -0.6282  11.00000  0.05    0.30 
Q9    1  -0.2325  0.8180  0.1811  11.00000  0.05    0.29 
Q10   1   0.3035  0.5399 -0.7123  11.00000  0.05    0.28 
; 
_shelx_res_checksum   40492 
  
_shelx_hkl_file 
; 
   1   0   0   21.55    0.30 
   1   0   0   21.68    0.30 
  -1   0   0   21.79    0.30 
  -1   0   0   21.51    0.30 
   2   0   0   23.29    0.34 
   2   0   0   23.71    0.33 
  -2   0   0   23.48    0.33 
  -2   0   0   23.36    0.34 
  -3   0   0   25.31    0.36 
   3   0   0   24.84    0.37 
  -3   0   0   24.70    0.37 
   3   0   0   25.53    0.37 
  -4   0   0   15.20    0.23 
   4   0   0   14.88    0.24 
   4   0   0   15.03    0.25 
  -4   0   0   14.59    0.24 
  -5   0   0    0.24    0.03 
   5   0   0    0.33    0.04 
   5   0   0    0.40    0.04 
  -5   0   0    0.31    0.03 
   6   0   0    4.24    0.11 
  -6   0   0    4.70    0.12 
   6   0   0    4.60    0.13 
  -6   0   0    4.56    0.11 
   7   0   0    2.74    0.11 
  -7   0   0    2.67    0.10 
   7   0   0    2.62    0.10 
  -7   0   0    2.68    0.09 
   8   0   0    1.18    0.08 
  -8   0   0    1.23    0.08 
  -8   0   0    1.24    0.07 
   8   0   0    1.13    0.07 
  -9   0   0   12.29    0.24 
   9   0   0   12.43    0.26 
   9   0   0   12.21    0.27 
  -9   0   0   12.07    0.26 
  10   0   0    0.08    0.05 
  10   0   0    0.08    0.05 
 -10   0   0    0.18    0.05 
 -10   0   0    0.08    0.04 
 -11   0   0   13.52    0.27 
 -11   0   0   13.42    0.31 
  11   0   0   13.54    0.30 
  11   0   0   13.41    0.31 
 -12   0   0   18.13    0.35 
  12   0   0   18.11    0.39 
  12   0   0   18.43    0.38 
 -12   0   0   18.17    0.39 
  13   0   0    3.11    0.16 
 -13   0   0    3.00    0.17 
  13   0   0    3.29    0.17 
 -14   0   0   23.62    0.49 
  14   0   0   23.96    0.49 
  14   0   0   23.60    0.49 
 -15   0   0    1.89    0.17 
  15   0   0    2.08    0.16 
  16   0   0    5.27    0.24 
 -16   0   0    4.65    0.24 
 -17   0   0    0.77    0.13 
  17   0   0    1.01    0.14 
  18   0   0    5.23    0.26 
 -18   0   0    4.77    0.26 
 -19   0   0    0.08    0.11 
   0  -1   0   -0.22    0.01 
   0  -1   0   -0.12    0.02 
   0  -1   0   -0.25    0.01 
   1  -1   0   13.21    0.20 
  -1  -1   0   12.56    0.20 
  -1  -1   0   12.83    0.21 
  -1  -1   0   12.87    0.19 
   1  -1   0   12.84    0.21 
  -1   1   0   21.38    0.30 
  -1   1   0   20.78    0.31 
   1   1   0   20.78    0.31 
  -2  -1   0  150.22    2.03 
   2  -1   0  149.14    2.05 
  -2  -1   0  150.80    2.03 
   2  -1   0  150.51    2.03 
  -2  -1   0  149.68    2.01 
   2   1   0  142.14    1.92 
  -2   1   0  142.39    1.91 
  -2   1   0  139.20    1.91 
  -3  -1   0   76.83    1.08 
  -3  -1   0   78.13    1.05 
  -3  -1   0   78.89    1.08 
   3  -1   0   77.20    1.08 
   3  -1   0   79.14    1.08 
  -3   1   0   89.48    1.22 
  -3   1   0   86.98    1.20 
   3   1   0   88.12    1.23 
  -4  -1   0  194.48    2.55 
   4  -1   0  182.65    2.56 
  -4  -1   0  192.25    2.57 
   4  -1   0  189.51    2.57 
  -4  -1   0  189.09    2.57 
   4   1   0  201.00    2.75 
  -4   1   0  203.30    2.71 
  -4   1   0  200.30    2.72 
   5  -1   0    2.56    0.09 
   5  -1   0    2.39    0.08 
  -5  -1   0    2.37    0.06 
   5   1   0    0.99    0.06 
  -5   1   0    0.96    0.06 
  -5   1   0    0.98    0.05 
   5   1   0    1.08    0.07 
  -6  -1   0    4.15    0.09 
   6  -1   0    4.05    0.12 
   6  -1   0    4.38    0.12 
  -6  -1   0    4.01    0.12 
  -6   1   0    4.70    0.12 
   6   1   0    4.38    0.12 
  -6   1   0    4.51    0.12 
   6   1   0    4.68    0.14 
  -7  -1   0   22.95    0.35 
  -7  -1   0   23.23    0.40 
   7  -1   0   22.28    0.39 
   7  -1   0   22.80    0.39 
   7   1   0   23.08    0.41 
   7   1   0   22.85    0.40 
  -7   1   0   22.67    0.38 
  -7   1   0   23.19    0.39 
  -8  -1   0    6.04    0.13 
  -8  -1   0    6.05    0.17 
   8  -1   0    5.94    0.17 
   8  -1   0    6.13    0.16 
  -8   1   0    6.48    0.17 
   8   1   0    6.49    0.19 
  -8   1   0    6.61    0.17 
   8   1   0    6.88    0.18 
  -9  -1   0    0.62    0.05 
   9  -1   0    0.59    0.07 
   9  -1   0    0.63    0.07 
  -9  -1   0    0.59    0.07 
  -9   1   0    1.06    0.08 
  -9   1   0    1.18    0.09 
   9   1   0    1.04    0.09 
   9   1   0    1.22    0.09 
  10  -1   0    6.31    0.19 
 -10  -1   0    6.63    0.20 
 -10  -1   0    6.48    0.15 
  10  -1   0    6.69    0.19 
 -10   1   0    6.63    0.18 
 -10   1   0    6.52    0.19 
  10   1   0    6.50    0.20 
  10   1   0    6.51    0.19 
 -11  -1   0    1.32    0.12 
  11  -1   0    1.53    0.12 
  11  -1   0    1.59    0.11 
 -11   1   0    1.32    0.10 
 -11   1   0    1.50    0.11 
  11   1   0    1.44    0.11 
  11   1   0    1.61    0.12 
 -12  -1   0   14.83    0.35 
  12  -1   0   14.82    0.34 
  12  -1   0   15.61    0.34 
 -12   1   0   13.21    0.30 
  12   1   0   13.21    0.32 
 -12   1   0   12.87    0.30 
  12   1   0   12.91    0.32 
  13  -1   0    7.93    0.25 
 -13  -1   0    7.90    0.26 
  13   1   0    8.34    0.26 
  13   1   0    7.77    0.25 
 -13   1   0    8.30    0.24 
 -13   1   0    8.07    0.24 
 -14  -1   0    9.14    0.29 
  14  -1   0    9.71    0.29 
 -14   1   0   10.96    0.29 
  14   1   0   10.60    0.31 
  14   1   0   10.86    0.31 
 -14   1   0   10.84    0.30 
 -15  -1   0    5.01    0.24 
  15  -1   0    5.06    0.22 
  15   1   0    5.18    0.23 
  15   1   0    5.65    0.24 
 -15   1   0    5.69    0.23 
 -16  -1   0    0.35    0.11 
  16  -1   0    0.40    0.10 
  16   1   0    0.14    0.09 
 -16   1   0    0.16    0.09 
 -17  -1   0    6.57    0.29 
  17  -1   0    6.34    0.27 
  17   1   0    7.02    0.32 
 -17   1   0    7.76    0.29 
 -18  -1   0    1.89    0.22 
  18  -1   0    2.09    0.21 
 -18   1   0    2.03    0.20 
  19  -1   0    3.25    0.24 
   0  -2   0  202.19    2.77 
   0  -2   0  203.87    2.76 
   0  -2   0  206.14    2.75 
   0   2   0  199.45    2.69 
  -1  -2   0   13.90    0.23 
  -1  -2   0   13.37    0.24 
  -1  -2   0   13.61    0.24 
   1  -2   0   13.51    0.24 
  -1  -2   0   13.75    0.22 
   1  -2   0   13.28    0.22 
   1  -2   0   13.48    0.23 
  -1   2   0   11.58    0.21 
   2  -2   0   85.59    1.20 
  -2  -2   0   85.35    1.19 
  -2  -2   0   85.73    1.16 
   2  -2   0   84.36    1.18 
  -2  -2   0   84.66    1.20 
  -2   2   0   82.92    1.18 
  -2   2   0   86.26    1.17 
   2   2   0   84.58    1.19 
  -3  -2   0   15.68    0.27 
  -3  -2   0   15.92    0.28 
   3  -2   0   15.48    0.28 
  -3  -2   0   15.83    0.24 
   3  -2   0   16.14    0.26 
  -3   2   0   19.62    0.33 
   3   2   0   19.33    0.33 
  -3   2   0   20.18    0.31 
  -4  -2   0   38.43    0.58 
   4  -2   0   36.88    0.59 
  -4  -2   0   38.54    0.53 
  -4  -2   0   36.96    0.58 
   4  -2   0   38.95    0.56 
  -4   2   0   34.23    0.53 
   4   2   0   34.10    0.54 
  -4   2   0   34.31    0.51 
  -5  -2   0   17.46    0.32 
  -5  -2   0   17.15    0.32 
   5  -2   0   17.91    0.29 
   5  -2   0   17.48    0.32 
  -5  -2   0   17.51    0.25 
  -5   2   0   18.88    0.31 
   5   2   0   18.46    0.35 
  -5   2   0   18.97    0.33 
  -6  -2   0    4.32    0.14 
   6  -2   0    4.33    0.12 
   6  -2   0    4.24    0.14 
  -6  -2   0    4.39    0.14 
  -6   2   0    2.63    0.09 
  -6   2   0    2.57    0.10 
   6   2   0    2.51    0.12 
   7  -2   0    1.07    0.08 
   7  -2   0    1.04    0.07 
  -7  -2   0    1.00    0.08 
   7   2   0    1.38    0.10 
   7   2   0    1.48    0.09 
  -7   2   0    1.49    0.08 
  -7   2   0    1.51    0.09 
   8  -2   0    2.99    0.11 
  -8  -2   0    3.51    0.14 
   8  -2   0    3.10    0.13 
   8   2   0    2.51    0.13 
   8   2   0    2.56    0.12 
  -8   2   0    2.55    0.10 
  -8   2   0    2.63    0.12 
   9  -2   0   13.05    0.30 
   9  -2   0   12.93    0.27 
  -9  -2   0   13.31    0.30 
   9   2   0   14.16    0.33 
  -9   2   0   13.96    0.30 
  -9   2   0   13.98    0.28 
   9   2   0   13.82    0.31 
  10  -2   0   11.27    0.26 
  10  -2   0   11.06    0.28 
 -10  -2   0   11.40    0.28 
  10   2   0   12.62    0.31 
  10   2   0   12.67    0.30 
 -10   2   0   12.43    0.27 
 -10   2   0   12.71    0.29 
 -11  -2   0    4.04    0.18 
  11  -2   0    4.20    0.17 
 -11   2   0    3.24    0.14 
  11   2   0    3.68    0.17 
 -11   2   0    3.34    0.16 
  11   2   0    3.33    0.16 
 -12  -2   0    3.93    0.19 
  12  -2   0    3.69    0.18 
 -12   2   0    4.79    0.18 
  12   2   0    4.29    0.19 
  12   2   0    4.53    0.20 
 -12   2   0    4.59    0.19 
 -13  -2   0    2.39    0.17 
  13  -2   0    2.57    0.16 
 -13   2   0    4.08    0.18 
  13   2   0    3.83    0.19 
 -13   2   0    4.08    0.18 
  13   2   0    3.47    0.18 
 -14  -2   0    8.39    0.29 
  14  -2   0    8.36    0.28 
 -14   2   0    8.43    0.30 
  14   2   0    8.64    0.29 
  14   2   0    8.53    0.29 
 -14   2   0    8.06    0.27 
 -15  -2   0    7.03    0.28 
  15  -2   0    7.07    0.26 
  15   2   0    7.37    0.28 
  15   2   0    7.34    0.27 
 -15   2   0    6.86    0.26 
  16  -2   0    8.41    0.30 
 -16  -2   0    8.16    0.31 
 -16   2   0    7.93    0.36 
  16   2   0    7.83    0.30 
  17  -2   0    1.40    0.16 
 -17  -2   0    1.55    0.18 
  17   2   0    1.60    0.17 
 -18  -2   0    2.88    0.31 
  18  -2   0    3.21    0.24 
   0  -3   0    0.02    0.02 
   0  -3   0    0.04    0.03 
   0  -3   0   -0.02    0.03 
   0   3   0   -0.01    0.03 
   1  -3   0   31.61    0.51 
  -1  -3   0   31.33    0.49 
   1  -3   0   30.79    0.48 
  -1  -3   0   31.97    0.51 
   1  -3   0   31.15    0.50 
  -1  -3   0   31.50    0.51 
   1   3   0   39.39    0.58 
  -1   3   0   37.98    0.59 
  -2  -3   0   17.56    0.32 
   2  -3   0   17.69    0.31 
  -2  -3   0   17.06    0.31 
   2  -3   0   17.70    0.33 
  -2   3   0   17.09    0.31 
  -2   3   0   17.30    0.29 
   2   3   0   17.24    0.29 
   2   3   0   17.34    0.32 
   3  -3   0   38.47    0.58 
   3  -3   0   37.86    0.61 
  -3  -3   0   38.44    0.60 
  -3  -3   0   38.10    0.61 
   3   3   0   36.74    0.61 
  -3   3   0   38.20    0.60 
  -3   3   0   39.26    0.58 
   3   3   0   38.85    0.56 
   4  -3   0   32.67    0.50 
  -4  -3   0   31.66    0.53 
   4  -3   0   32.47    0.54 
  -4  -3   0   32.65    0.48 
  -4  -3   0   32.58    0.54 
   4   3   0   28.38    0.49 
  -4   3   0   29.01    0.49 
  -4   3   0   29.07    0.45 
  -5  -3   0   11.62    0.25 
  -5  -3   0   11.62    0.19 
  -5  -3   0   11.47    0.26 
   5  -3   0   11.75    0.23 
   5  -3   0   11.46    0.26 
  -5   3   0    8.49    0.21 
   5   3   0    8.70    0.22 
  -5   3   0    8.80    0.18 
   6  -3   0    0.99    0.09 
   6  -3   0    0.99    0.07 
  -6  -3   0    0.78    0.09 
  -6  -3   0    0.91    0.09 
   6   3   0    1.94    0.12 
  -6   3   0    1.93    0.11 
  -6   3   0    2.00    0.09 
  -7  -3   0   17.81    0.37 
  -7  -3   0   17.40    0.36 
   7  -3   0   17.66    0.31 
   7  -3   0   18.35    0.37 
  -7   3   0   17.91    0.32 
  -7   3   0   17.71    0.36 
   7   3   0   17.84    0.38 
   8  -3   0    1.49    0.08 
  -8  -3   0    1.34    0.12 
  -8  -3   0    1.47    0.12 
   8  -3   0    1.33    0.11 
   8   3   0    1.55    0.13 
  -8   3   0    1.50    0.09 
  -8   3   0    1.62    0.12 
   9  -3   0    9.66    0.26 
  -9  -3   0    9.61    0.26 
   9   3   0   10.90    0.29 
   9   3   0   11.08    0.30 
  -9   3   0   11.42    0.28 
 -10  -3   0    4.74    0.20 
  10  -3   0    4.63    0.19 
  10   3   0    5.40    0.21 
  10   3   0    5.37    0.21 
 -10   3   0    5.23    0.20 
  11  -3   0    4.14    0.19 
 -11  -3   0    4.01    0.19 
  11   3   0    4.56    0.21 
 -11   3   0    4.16    0.19 
  11   3   0    4.04    0.20 
  12  -3   0    1.90    0.15 
 -12  -3   0    1.95    0.16 
 -12   3   0    1.52    0.15 
  12   3   0    1.92    0.16 
  12   3   0    1.87    0.16 
 -13  -3   0    0.78    0.12 
  13  -3   0    0.67    0.11 
 -13   3   0    0.83    0.12 
  13   3   0    0.98    0.13 
  13   3   0    1.00    0.13 
  14  -3   0    0.78    0.12 
 -14  -3   0    0.99    0.13 
  14   3   0    0.55    0.12 
 -14   3   0    0.39    0.11 
 -15  -3   0    5.54    0.27 
  15  -3   0    5.19    0.25 
 -15   3   0    5.95    0.26 
  15   3   0    6.24    0.28 
 -16  -3   0    0.01    0.11 
  16  -3   0    0.20    0.11 
  16   3   0    0.22    0.11 
 -16   3   0    0.24    0.11 
  17  -3   0    3.15    0.23 
 -17  -3   0    2.97    0.32 
  17   3   0    2.52    0.23 
 -17   3   0    2.62    0.22 
  18   3   0    1.22    0.18 
   0  -4   0   15.94    0.33 
   0  -4   0   15.88    0.32 
   0  -4   0   16.01    0.30 
   0   4   0   12.74    0.26 
  -1  -4   0    6.21    0.16 
  -1  -4   0    6.06    0.18 
   1  -4   0    6.31    0.16 
  -1  -4   0    6.50    0.18 
   1  -4   0    6.43    0.19 
   1  -4   0    6.23    0.17 
  -1   4   0    5.67    0.16 
   1   4   0    5.46    0.15 
   2  -4   0    7.09    0.18 
  -2  -4   0    7.19    0.18 
   2  -4   0    7.05    0.20 
  -2  -4   0    6.91    0.20 
   2   4   0    7.17    0.17 
   2   4   0    7.12    0.20 
  -2   4   0    7.24    0.19 
  -2   4   0    7.20    0.17 
  -3  -4   0   10.02    0.23 
   3  -4   0   10.22    0.23 
   3  -4   0   10.31    0.26 
  -3  -4   0   10.21    0.25 
   3   4   0   10.89    0.22 
   3   4   0   11.07    0.27 
  -3   4   0   11.12    0.26 
  -3   4   0   11.29    0.24 
  -4  -4   0    6.66    0.19 
  -4  -4   0    6.52    0.20 
   4  -4   0    6.59    0.21 
   4  -4   0    6.65    0.17 
  -4   4   0    6.56    0.19 
   4   4   0    6.25    0.20 
   5  -4   0    8.13    0.24 
   5  -4   0    8.86    0.20 
  -5  -4   0    8.47    0.23 
  -5  -4   0    8.85    0.24 
   5   4   0   10.47    0.27 
  -5   4   0   10.56    0.26 
   6  -4   0   13.45    0.27 
   6  -4   0   12.76    0.31 
  -6  -4   0   12.86    0.30 
  -6  -4   0   12.81    0.31 
   6   4   0   14.47    0.34 
  -6   4   0   14.99    0.33 
   7  -4   0    1.53    0.13 
  -7  -4   0    1.61    0.12 
  -7  -4   0    1.65    0.13 
  -7   4   0    1.48    0.13 
   7   4   0    1.63    0.13 
   8  -4   0   15.12    0.36 
  -8  -4   0   15.02    0.36 
  -8  -4   0   14.70    0.35 
  -8   4   0   15.94    0.37 
   8   4   0   16.20    0.39 
  -9  -4   0    2.43    0.16 
  -9  -4   0    2.60    0.16 
   9  -4   0    2.32    0.16 
   9   4   0    1.97    0.16 
   9   4   0    2.11    0.16 
  -9   4   0    2.01    0.15 
 -10  -4   0   10.26    0.30 
  10  -4   0   10.34    0.31 
  10   4   0   10.26    0.32 
  10   4   0   11.02    0.32 
 -10   4   0   10.67    0.31 
  11  -4   0    0.85    0.12 
 -11  -4   0    0.89    0.12 
 -11   4   0    1.16    0.14 
  11   4   0    1.20    0.14 
  11   4   0    1.15    0.14 
 -12  -4   0    1.91    0.18 
  12  -4   0    1.65    0.16 
  12   4   0    1.21    0.15 
  12   4   0    1.69    0.17 
 -12   4   0    1.52    0.16 
  13  -4   0    0.96    0.13 
 -13  -4   0    1.04    0.14 
  13   4   0    1.40    0.16 
 -13   4   0    1.25    0.15 
 -14  -4   0    2.01    0.20 
  14  -4   0    2.21    0.19 
  14   4   0    2.84    0.23 
 -14   4   0    3.03    0.23 
  15  -4   0    1.65    0.18 
 -15  -4   0    1.86    0.22 
  15   4   0    1.40    0.17 
 -15   4   0    1.43    0.17 
  16  -4   0    1.77    0.21 
 -16   4   0    1.93    0.20 
  16   4   0    2.17    0.23 
   0  -5   0    0.04    0.05 
   0  -5   0    0.11    0.07 
   0   5   0    0.00    0.05 
  -1  -5   0    2.28    0.15 
  -1  -5   0    2.52    0.12 
   1  -5   0    2.35    0.15 
  -1  -5   0    2.41    0.14 
   1  -5   0    2.61    0.13 
  -1   5   0    3.08    0.14 
   1   5   0    2.99    0.16 
   1   5   0    2.91    0.13 
  -2  -5   0    5.50    0.17 
   2  -5   0    5.18    0.18 
  -2  -5   0    5.06    0.19 
   2  -5   0    5.56    0.20 
  -2   5   0    5.73    0.19 
   2   5   0    6.06    0.22 
   2   5   0    5.89    0.22 
  -3  -5   0    5.33    0.18 
   3  -5   0    5.42    0.18 
   3  -5   0    4.86    0.20 
  -3  -5   0    5.09    0.20 
   3   5   0    4.92    0.20 
  -3   5   0    5.02    0.19 
   4  -5   0    5.85    0.18 
   4  -5   0    5.31    0.21 
  -4  -5   0    5.60    0.19 
  -4  -5   0    5.14    0.21 
   4   5   0    5.08    0.21 
  -4   5   0    4.97    0.19 
  -5  -5   0    5.96    0.22 
   5  -5   0    5.50    0.22 
  -5  -5   0    5.81    0.20 
   5   5   0    4.47    0.20 
  -5   5   0    4.16    0.19 
   6  -5   0    2.72    0.18 
  -6  -5   0    2.96    0.18 
  -6  -5   0    2.97    0.16 
   6   5   0    4.43    0.20 
  -6   5   0    4.15    0.19 
  -7  -5   0   10.75    0.30 
   7  -5   0   10.35    0.31 
  -7  -5   0   10.45    0.31 
  -7   5   0   10.63    0.31 
   7   5   0   10.49    0.32 
  -8  -5   0    0.59    0.10 
  -8  -5   0    0.39    0.10 
   8  -5   0    0.49    0.10 
   8   5   0    0.49    0.10 
  -8   5   0    0.42    0.10 
   9  -5   0    5.75    0.25 
  -9  -5   0    5.67    0.24 
  -9  -5   0    5.53    0.25 
  -9   5   0    7.50    0.28 
   9   5   0    7.34    0.29 
  10  -5   0    1.86    0.18 
 -10  -5   0    1.99    0.18 
  10   5   0    2.10    0.19 
 -10   5   0    2.27    0.20 
  10   5   0    2.29    0.19 
  11  -5   0    6.59    0.28 
 -11  -5   0    6.59    0.28 
 -11   5   0    5.74    0.27 
  11   5   0    5.66    0.28 
 -12  -5   0    0.94    0.14 
  12  -5   0    0.88    0.14 
 -12   5   0    0.99    0.15 
  12   5   0    1.11    0.16 
 -13  -5   0    0.35    0.12 
  13  -5   0    0.30    0.12 
 -13   5   0    0.43    0.14 
  13   5   0    0.66    0.15 
  14  -5   0    0.97    0.19 
 -14  -5   0    1.20    0.17 
 -14   5   0    0.97    0.17 
  14   5   0    0.87    0.16 
   0  -6   0    2.53    0.16 
   0  -6   0    2.51    0.18 
   0   6   0    2.57    0.19 
  -1  -6   0    0.35    0.09 
   1  -6   0    0.24    0.09 
   1  -6   0    0.53    0.09 
   1   6   0    0.35    0.09 
  -1   6   0    0.22    0.08 
   2  -6   0    2.36    0.18 
  -2  -6   0    2.09    0.16 
   2  -6   0    2.36    0.15 
   2   6   0    2.15    0.17 
  -2   6   0    2.29    0.16 
  -3  -6   0    2.09    0.17 
   3  -6   0    2.25    0.18 
   3   6   0    3.16    0.20 
  -3   6   0    2.74    0.17 
   4  -6   0    1.96    0.17 
  -4  -6   0    1.57    0.16 
   4   6   0    1.91    0.18 
  -4   6   0    1.32    0.15 
   5  -6   0    3.87    0.22 
  -5  -6   0    3.62    0.21 
  -5   6   0    3.69    0.21 
   5   6   0    4.07    0.22 
  -6  -6   0   16.08    0.49 
   6  -6   0   15.02    0.41 
  -6  -6   0   15.34    0.41 
   6   6   0   16.58    0.44 
  -6   6   0   17.00    0.42 
   7  -6   0    3.74    0.23 
  -7  -6   0    3.68    0.22 
  -7  -6   0    3.84    0.20 
  -7   6   0    3.50    0.21 
   7   6   0    3.46    0.22 
  -8  -6   0    9.97    0.32 
  -8  -6   0    9.32    0.33 
   8  -6   0    9.87    0.34 
   8   6   0   10.89    0.37 
  -8   6   0   11.90    0.37 
  -9  -6   0    1.49    0.17 
   9  -6   0    1.04    0.16 
  -9  -6   0    1.20    0.15 
  -9   6   0    1.30    0.16 
  10  -6   0    2.88    0.24 
 -10  -6   0    3.02    0.22 
 -10   6   0    2.37    0.23 
  10   6   0    2.60    0.23 
  11  -6   0    0.71    0.15 
 -11  -6   0    0.65    0.14 
 -11   6   0    0.86    0.16 
  11   6   0    0.65    0.15 
 -12  -6   0    3.96    0.27 
   0  -7   0   -0.05    0.09 
   0   7   0   -0.11    0.08 
  -1  -7   0    0.49    0.12 
   1  -7   0    0.36    0.12 
  -1   7   0    0.44    0.12 
   1   7   0    0.25    0.11 
  -2  -7   0    1.19    0.15 
   2  -7   0    1.10    0.16 
   2   7   0    1.12    0.15 
   3  -7   0    1.30    0.16 
  -3  -7   0    1.46    0.16 
  -3   7   0    1.10    0.15 
   3   7   0    0.97    0.15 
  -4  -7   0    1.94    0.20 
   4  -7   0    1.71    0.18 
  -4   7   0    1.91    0.19 
   4   7   0    1.74    0.20 
  -5  -7   0    1.71    0.19 
   5  -7   0    1.41    0.17 
   5   7   0    1.86    0.21 
  -5   7   0    2.08    0.20 
   6  -7   0    2.18    0.23 
  -6  -7   0    2.00    0.21 
   6   7   0    1.94    0.22 
  -6   7   0    2.20    0.21 
  -7  -7   0    1.81    0.21 
   7  -7   0    1.68    0.19 
  -7   7   0    1.47    0.18 
  -2  -8   0    1.18    0.18 
 -19   0   1   -0.16    0.11 
 -18   0   1    1.65    0.17 
 -17   0   1    0.05    0.10 
  17   0  -1    0.13    0.10 
 -16   0   1    3.86    0.21 
  16   0  -1    4.58    0.22 
 -15   0   1    0.61    0.11 
  15   0  -1    0.67    0.11 
  14   0  -1    1.65    0.14 
  14   0  -1    1.71    0.14 
 -14   0   1    1.46    0.14 
 -13   0   1    0.12    0.07 
  13   0  -1    0.14    0.07 
  13   0  -1    0.06    0.06 
  12   0  -1   10.69    0.28 
 -12   0   1   10.82    0.28 
  12   0  -1   11.10    0.28 
 -12   0   1   11.07    0.25 
 -11   0   1   38.44    0.61 
  11   0  -1   38.71    0.65 
  11   0  -1   37.96    0.65 
 -11   0   1   38.26    0.65 
 -10   0   1    2.21    0.12 
 -10   0   1    2.22    0.10 
  10   0  -1    2.29    0.12 
  10   0  -1    2.04    0.11 
  -9   0   1   10.07    0.21 
   9   0  -1    9.90    0.23 
   9   0  -1   10.04    0.23 
  -9   0   1    9.89    0.23 
   8   0  -1    4.93    0.14 
  -8   0   1    4.99    0.15 
  -8   0   1    5.09    0.13 
   8   0  -1    5.04    0.15 
  -7   0   1   29.37    0.45 
   7   0  -1   29.35    0.47 
   7   0  -1   28.76    0.47 
  -7   0   1   29.30    0.47 
  -6   0   1   21.23    0.34 
  -6   0   1   21.35    0.35 
   6   0  -1   20.93    0.35 
   6   0  -1   21.16    0.35 
   5   0  -1   12.85    0.23 
  -5   0   1   13.11    0.22 
   5   0  -1   12.85    0.23 
  -5   0   1   12.82    0.23 
  -4   0   1  164.42    2.21 
  -4   0   1  163.74    2.21 
   4   0  -1  164.81    2.21 
   4   0  -1  161.43    2.22 
  -3   0   1    0.36    0.03 
  -3   0   1    0.33    0.02 
   3   0  -1    0.37    0.03 
   3   0  -1    0.32    0.03 
  -2   0   1    3.47    0.09 
  -2   0   1    3.59    0.09 
   2   0  -1    3.58    0.09 
   2   0  -1    3.51    0.09 
  -1   0   1    1.51    0.03 
   1   0  -1    1.48    0.03 
  -1   0   1    1.46    0.03 
   1   0   1    2.80    0.05 
  -1   0  -1    2.82    0.05 
   2   0   1    2.93    0.07 
   2   0   1    2.85    0.05 
  -2   0  -1    2.86    0.05 
  -3   0  -1   33.81    0.47 
  -3   0  -1   33.33    0.49 
   3   0   1   33.84    0.50 
   3   0   1   34.21    0.48 
  -4   0  -1    1.15    0.04 
   4   0   1    1.27    0.05 
   4   0   1    1.15    0.06 
  -4   0  -1    1.21    0.05 
  -5   0  -1   15.46    0.25 
  -5   0  -1   15.23    0.27 
   5   0   1   15.49    0.28 
   5   0   1   15.49    0.26 
  -6   0  -1    9.06    0.19 
   6   0   1    8.82    0.20 
   6   0   1    9.16    0.18 
  -6   0  -1    9.15    0.17 
   7   0   1   82.13    1.20 
  -7   0  -1   80.68    1.18 
   7   0   1   83.54    1.17 
  -7   0  -1   83.32    1.15 
  -8   0  -1   20.24    0.37 
   8   0   1   20.43    0.38 
   8   0   1   20.41    0.36 
  -8   0  -1   20.84    0.34 
  -9   0  -1   24.13    0.43 
  -9   0  -1   24.66    0.40 
   9   0   1   23.93    0.42 
   9   0   1   23.85    0.44 
  10   0   1    2.15    0.12 
  10   0   1    2.18    0.11 
 -10   0  -1    1.94    0.12 
 -10   0  -1    2.17    0.10 
  11   0   1    5.73    0.19 
  11   0   1    5.87    0.18 
 -11   0  -1    5.77    0.16 
 -11   0  -1    5.80    0.20 
  12   0   1    6.71    0.22 
 -12   0  -1    7.34    0.23 
  12   0   1    7.48    0.22 
  13   0   1    1.36    0.13 
 -13   0  -1    1.67    0.15 
  13   0   1    1.60    0.13 
  14   0   1    6.52    0.24 
 -14   0  -1    6.07    0.24 
 -15   0  -1    0.05    0.09 
  15   0   1    0.25    0.09 
 -16   0  -1    1.03    0.14 
  16   0   1    0.85    0.12 
 -17   0  -1    0.14    0.11 
  17   0   1    0.09    0.10 
 -18   0  -1    0.70    0.14 
  18   0   1    0.53    0.13 
  19   0   1    0.92    0.16 
 -19   0  -1    0.60    0.16 
 -18  -1   1    2.41    0.23 
  18  -1  -1    2.66    0.21 
  17  -1  -1    2.34    0.19 
 -17  -1   1    2.17    0.21 
 -17   1   1    2.12    0.19 
  16  -1  -1    0.27    0.10 
 -16  -1   1    0.26    0.11 
 -16   1   1    0.23    0.09 
  16   1  -1    0.22    0.10 
  16   1  -1    0.24    0.09 
  15  -1  -1    1.41    0.14 
 -15  -1   1    1.45    0.17 
  15   1  -1    1.37    0.15 
  15   1  -1    1.32    0.14 
 -15   1   1    1.18    0.12 
 -14  -1   1    0.14    0.09 
  14  -1  -1    0.18    0.08 
  14   1  -1    0.17    0.08 
 -14   1   1    0.07    0.07 
 -14   1   1    0.08    0.07 
  14   1  -1    0.12    0.07 
  13  -1  -1    0.92    0.12 
 -13  -1   1    1.23    0.12 
  13  -1  -1    0.97    0.11 
 -13   1   1    1.77    0.13 
  13   1  -1    1.54    0.13 
  13   1  -1    1.53    0.13 
 -13   1   1    1.74    0.13 
  12  -1  -1    7.14    0.22 
 -12  -1   1    6.74    0.23 
  12  -1  -1    6.52    0.21 
 -12   1   1    6.03    0.20 
  12   1  -1    5.68    0.21 
 -12   1   1    5.96    0.19 
  12   1  -1    5.88    0.20 
  11  -1  -1   10.77    0.27 
  11  -1  -1   10.44    0.26 
 -11  -1   1   10.39    0.27 
  11   1  -1   11.07    0.27 
 -11   1   1   10.62    0.26 
  11   1  -1   10.99    0.27 
 -11   1   1   10.83    0.26 
  10  -1  -1   11.71    0.27 
 -10  -1   1   11.69    0.23 
  10  -1  -1   12.38    0.28 
 -10  -1   1   11.71    0.28 
  10   1  -1   12.62    0.29 
 -10   1   1   12.75    0.27 
  10   1  -1   12.34    0.29 
 -10   1   1   12.73    0.27 
   9  -1  -1    6.12    0.17 
  -9  -1   1    5.73    0.18 
  -9  -1   1    6.14    0.14 
   9  -1  -1    5.92    0.17 
   9   1  -1    5.28    0.17 
  -9   1   1    5.13    0.15 
   9   1  -1    4.97    0.16 
  -9   1   1    5.21    0.15 
   8  -1  -1   74.02    1.10 
  -8  -1   1   75.32    1.06 
  -8  -1   1   75.53    1.11 
   8  -1  -1   74.98    1.10 
   8   1  -1   83.79    1.22 
  -8   1   1   81.73    1.19 
   8   1  -1   84.08    1.22 
  -8   1   1   82.70    1.20 
  -7  -1   1   18.77    0.30 
   7  -1  -1   19.06    0.34 
  -7  -1   1   18.97    0.34 
   7  -1  -1   18.96    0.34 
  -7   1   1   21.69    0.37 
   7   1  -1   21.78    0.38 
  -7   1   1   21.47    0.36 
   7   1  -1   21.50    0.38 
  -6  -1   1   56.53    0.84 
   6  -1  -1   57.89    0.84 
  -6  -1   1   56.31    0.80 
   6  -1  -1   57.07    0.84 
  -6   1   1   55.93    0.82 
  -6   1   1   56.78    0.81 
   6   1  -1   55.73    0.83 
   6   1  -1   57.18    0.84 
  -5  -1   1   44.24    0.61 
   5  -1  -1   42.31    0.64 
   5  -1  -1   43.08    0.64 
  -5  -1   1   42.40    0.64 
   5   1  -1   36.23    0.56 
  -5   1   1   37.45    0.54 
  -5   1   1   36.39    0.55 
   5   1  -1   36.73    0.56 
  -4  -1   1   27.61    0.40 
   4  -1  -1   26.60    0.42 
   4  -1  -1   26.51    0.41 
  -4  -1   1   26.52    0.42 
   4   1  -1   26.47    0.42 
  -4   1   1   26.31    0.41 
   4   1  -1   26.32    0.41 
  -4   1   1   26.47    0.39 
   3  -1  -1   12.90    0.22 
  -3  -1   1   13.26    0.20 
   3  -1  -1   12.77    0.22 
  -3  -1   1   12.90    0.22 
   3   1  -1   15.37    0.25 
  -3   1   1   15.00    0.23 
  -3   1   1   15.10    0.25 
  -2  -1   1   31.85    0.44 
  -2  -1   1   31.60    0.46 
  -2  -1   1   31.44    0.46 
   2  -1  -1   32.10    0.46 
   2  -1  -1   31.02    0.46 
  -2   1   1   29.12    0.43 
   2   1  -1   29.19    0.42 
  -2   1   1   29.55    0.41 
  -1  -1   1    8.25    0.13 
  -1  -1   1    8.19    0.14 
  -1  -1   1    8.21    0.14 
  -1  -1   1    8.14    0.14 
   1  -1  -1    8.44    0.14 
  -1   1   1    9.62    0.16 
  -1   1   1    9.70    0.14 
   0  -1  -1    4.26    0.09 
   0  -1   1    4.09    0.08 
   0  -1  -1    4.22    0.07 
   0  -1   1    4.30    0.08 
   0  -1   1    4.07    0.08 
   0  -1   1    4.16    0.08 
   0  -1  -1    3.92    0.08 
   0   1   1    5.23    0.09 
  -1  -1  -1    6.10    0.11 
  -1  -1  -1    6.27    0.12 
   1  -1   1    5.95    0.11 
   1  -1   1    5.95    0.10 
   1  -1   1    6.03    0.11 
   1   1   1    6.60    0.10 
   1   1   1    6.25    0.12 
  -1   1  -1    6.70    0.12 
  -2  -1  -1   28.15    0.42 
   2  -1   1   28.58    0.40 
   2  -1   1   28.62    0.42 
  -2  -1  -1   29.31    0.42 
   2  -1   1   28.87    0.42 
  -2   1  -1   30.52    0.44 
   2   1   1   30.17    0.45 
   3  -1   1   23.15    0.33 
  -3  -1  -1   22.97    0.35 
   3  -1   1   22.54    0.35 
  -3  -1  -1   22.61    0.35 
   3   1   1   26.02    0.41 
  -3   1  -1   25.83    0.39 
  -3   1  -1   25.35    0.39 
   4  -1   1   96.45    1.34 
  -4  -1  -1   93.63    1.33 
  -4  -1  -1   97.49    1.34 
   4  -1   1   97.36    1.32 
   4   1   1  103.92    1.46 
  -4   1  -1  104.70    1.42 
  -4   1  -1  101.40    1.42 
  -5  -1  -1    2.75    0.09 
  -5  -1  -1    2.87    0.06 
   5  -1   1    2.68    0.09 
  -5  -1  -1    2.78    0.09 
   5  -1   1    2.89    0.08 
  -5   1  -1    2.70    0.09 
  -5   1  -1    2.82    0.09 
   5   1   1    2.87    0.11 
  -6  -1  -1   67.55    0.92 
   6  -1   1   66.92    0.96 
  -6  -1  -1   66.95    0.98 
   6  -1   1   67.21    0.98 
  -6   1  -1   70.67    1.01 
  -6   1  -1   69.82    1.01 
   6   1   1   70.67    1.02 
   6   1   1   70.72    1.05 
   7  -1   1    4.36    0.12 
   7  -1   1    4.19    0.13 
  -7  -1  -1    4.08    0.09 
  -7  -1  -1    4.01    0.13 
   7   1   1    4.63    0.14 
  -7   1  -1    4.88    0.14 
   7   1   1    4.81    0.16 
  -7   1  -1    4.88    0.13 
   8  -1   1   24.80    0.42 
  -8  -1  -1   24.69    0.37 
   8  -1   1   24.76    0.44 
  -8  -1  -1   24.24    0.44 
   8   1   1   24.20    0.42 
  -8   1  -1   24.47    0.42 
   8   1   1   23.42    0.44 
  -8   1  -1   23.90    0.41 
   9  -1   1    3.08    0.12 
   9  -1   1    3.20    0.13 
  -9  -1  -1    3.26    0.09 
  -9  -1  -1    3.11    0.14 
   9   1   1    2.30    0.11 
  -9   1  -1    2.29    0.10 
   9   1   1    2.49    0.13 
  -9   1  -1    2.28    0.11 
 -10  -1  -1    9.40    0.25 
  10  -1   1    9.25    0.24 
  10  -1   1    9.86    0.23 
 -10   1  -1   11.73    0.26 
  10   1   1   11.80    0.27 
  10   1   1   11.66    0.29 
 -10   1  -1   12.06    0.27 
  11  -1   1    3.29    0.14 
  11  -1   1    3.42    0.15 
 -11  -1  -1    3.42    0.16 
 -11   1  -1    4.81    0.16 
  11   1   1    5.37    0.18 
 -11   1  -1    4.88    0.18 
  11   1   1    5.33    0.20 
  12  -1   1    4.31    0.18 
 -12  -1  -1    4.21    0.18 
  12   1   1    4.45    0.18 
 -12   1  -1    4.21    0.16 
  12   1   1    4.48    0.19 
 -12   1  -1    4.38    0.18 
 -13  -1  -1    0.38    0.09 
  13  -1   1    0.35    0.08 
  13   1   1    0.62    0.10 
 -13   1  -1    0.93    0.11 
  13   1   1    0.70    0.10 
 -13   1  -1    0.57    0.09 
  14  -1   1    5.94    0.24 
 -14  -1  -1    6.01    0.24 
  14   1   1    7.05    0.25 
  14   1   1    6.66    0.25 
 -14   1  -1    6.86    0.24 
  15  -1   1    0.39    0.10 
 -15  -1  -1    0.38    0.11 
  15   1   1    0.42    0.10 
 -15   1  -1    0.39    0.10 
  15   1   1    0.23    0.09 
 -16  -1  -1    1.27    0.15 
  16  -1   1    1.52    0.17 
  16   1   1    1.91    0.18 
 -16   1  -1    2.14    0.18 
 -17  -1  -1    0.31    0.12 
  17  -1   1    0.49    0.12 
  17   1   1    0.65    0.13 
 -17   1  -1    0.59    0.12 
 -18  -1  -1    2.61    0.23 
  18  -1   1    2.96    0.23 
 -18   1  -1    2.12    0.21 
  19  -1   1    3.91    0.27 
 -18  -2   1    1.45    0.18 
  18  -2  -1    1.33    0.16 
 -17  -2   1    0.12    0.11 
  17  -2  -1    0.06    0.10 
  17   2  -1    0.03    0.10 
 -16  -2   1    5.63    0.27 
  16  -2  -1    5.29    0.25 
 -16   2   1    5.07    0.24 
  16   2  -1    5.23    0.26 
 -15  -2   1    4.67    0.23 
  15  -2  -1    5.14    0.23 
 -15   2   1    4.77    0.22 
  15   2  -1    5.39    0.24 
  14  -2  -1    6.86    0.25 
 -14  -2   1    7.00    0.27 
  14   2  -1    8.26    0.27 
  14   2  -1    8.21    0.28 
 -14   2   1    9.00    0.28 
 -13  -2   1    0.52    0.10 
  13  -2  -1    0.67    0.10 
  13   2  -1    0.45    0.09 
 -13   2   1    0.43    0.09 
  13   2  -1    0.31    0.09 
 -13   2   1    0.42    0.08 
 -12  -2   1    2.44    0.16 
  12  -2  -1    2.75    0.16 
 -12   2   1    1.45    0.13 
  12   2  -1    1.35    0.14 
 -12   2   1    1.42    0.12 
  12   2  -1    1.58    0.13 
  11  -2  -1    8.74    0.25 
  11  -2  -1    8.33    0.25 
 -11  -2   1    9.20    0.26 
 -11   2   1    9.17    0.23 
  11   2  -1    9.19    0.26 
  11   2  -1    9.28    0.26 
 -11   2   1    8.91    0.25 
 -10  -2   1   -0.01    0.05 
  10  -2  -1    0.07    0.05 
  10  -2  -1    0.00    0.04 
  10   2  -1    0.07    0.06 
 -10   2   1    0.04    0.05 
 -10   2   1    0.08    0.05 
  10   2  -1    0.07    0.06 
  -9  -2   1   22.43    0.43 
   9  -2  -1   22.32    0.42 
   9  -2  -1   22.15    0.42 
  -9   2   1   25.44    0.43 
   9   2  -1   25.74    0.48 
   9   2  -1   25.41    0.48 
  -9   2   1   24.75    0.46 
  -8  -2   1   14.65    0.24 
  -8  -2   1   14.51    0.31 
   8  -2  -1   14.95    0.31 
   8  -2  -1   14.39    0.29 
   8   2  -1   16.53    0.34 
   8   2  -1   16.45    0.34 
  -8   2   1   17.04    0.33 
  -8   2   1   17.29    0.31 
   7  -2  -1    7.05    0.18 
  -7  -2   1    7.04    0.19 
   7  -2  -1    6.64    0.17 
  -7  -2   1    7.00    0.13 
  -7   2   1    6.45    0.15 
   7   2  -1    6.40    0.18 
   7   2  -1    6.72    0.18 
  -7   2   1    6.19    0.17 
  -6  -2   1   59.26    0.89 
   6  -2  -1   59.35    0.87 
  -6  -2   1   60.35    0.82 
   6  -2  -1   58.19    0.88 
  -6   2   1   60.78    0.86 
   6   2  -1   61.17    0.92 
   6   2  -1   59.89    0.91 
  -6   2   1   60.02    0.90 
   5  -2  -1   15.99    0.28 
   5  -2  -1   15.56    0.29 
  -5  -2   1   15.94    0.24 
  -5  -2   1   16.14    0.30 
  -5  -2   1   15.98    0.30 
  -5   2   1   14.04    0.27 
   5   2  -1   14.39    0.28 
  -5   2   1   14.78    0.24 
  -4  -2   1   23.74    0.40 
  -4  -2   1   24.65    0.35 
   4  -2  -1   23.28    0.40 
   4  -2  -1   23.99    0.38 
  -4  -2   1   24.01    0.39 
   4   2  -1   23.82    0.39 
  -4   2   1   23.64    0.35 
  -4   2   1   23.11    0.39 
   3  -2  -1    0.32    0.04 
  -3  -2   1    0.22    0.03 
  -3  -2   1    0.27    0.03 
   3  -2  -1    0.16    0.03 
  -3  -2   1    0.23    0.03 
  -3   2   1    0.01    0.02 
  -3   2   1    0.05    0.02 
   3   2  -1    0.04    0.03 
  -2  -2   1   10.03    0.17 
  -2  -2   1    9.68    0.19 
   2  -2  -1    9.69    0.19 
  -2  -2   1    9.68    0.19 
   2  -2  -1    9.69    0.18 
   2   2  -1    8.62    0.17 
  -2   2   1    8.56    0.17 
  -2   2   1    8.85    0.15 
  -1  -2   1   28.95    0.44 
   1  -2  -1   29.34    0.45 
  -1  -2   1   29.86    0.45 
  -1  -2   1   28.99    0.43 
  -1  -2   1   29.32    0.45 
   1  -2  -1   29.79    0.42 
   1  -2  -1   28.90    0.45 
  -1   2   1   28.31    0.43 
   0  -2  -1   13.17    0.24 
   0  -2   1   13.64    0.23 
   0  -2   1   13.77    0.23 
   0  -2   1   13.37    0.24 
   0  -2  -1   13.79    0.22 
   0  -2  -1   13.25    0.24 
   0  -2   1   13.52    0.23 
   0   2   1   14.95    0.24 
   1  -2   1   25.05    0.38 
  -1  -2  -1   24.53    0.40 
   1  -2   1   24.84    0.39 
  -1  -2  -1   24.59    0.39 
  -1  -2  -1   25.29    0.38 
   1  -2   1   25.48    0.39 
  -1   2  -1   26.44    0.40 
   1   2   1   26.02    0.38 
   1   2   1   25.96    0.41 
  -2  -2  -1   20.44    0.34 
   2  -2   1   20.20    0.34 
  -2  -2  -1   20.71    0.33 
   2  -2   1   21.08    0.32 
   2   2   1   18.92    0.28 
  -2   2  -1   19.15    0.31 
  -2   2  -1   19.07    0.32 
   2   2   1   18.78    0.32 
   3  -2   1   10.11    0.20 
  -3  -2  -1   10.27    0.20 
   3  -2   1   10.31    0.18 
   3   2   1    9.93    0.15 
  -3   2  -1    9.98    0.19 
  -3   2  -1    9.53    0.19 
   3   2   1    9.79    0.21 
  -4  -2  -1    5.00    0.13 
   4  -2   1    5.05    0.13 
   4  -2   1    5.02    0.11 
  -4  -2  -1    4.79    0.13 
  -4   2  -1    5.65    0.13 
  -4   2  -1    5.32    0.14 
   4   2   1    5.48    0.15 
   5  -2   1   23.38    0.41 
   5  -2   1   24.71    0.37 
  -5  -2  -1   23.76    0.41 
  -5  -2  -1   23.86    0.40 
  -5   2  -1   30.60    0.47 
  -5   2  -1   30.16    0.49 
   5   2   1   30.52    0.52 
   6  -2   1    3.11    0.09 
  -6  -2  -1    3.22    0.12 
  -6  -2  -1    2.96    0.12 
   6  -2   1    2.99    0.12 
   6   2   1    3.54    0.14 
  -6   2  -1    3.46    0.12 
  -6   2  -1    3.64    0.11 
   7  -2   1   22.74    0.36 
  -7  -2  -1   21.39    0.40 
   7  -2   1   21.91    0.40 
  -7  -2  -1   22.01    0.40 
  -7   2  -1   18.63    0.35 
   7   2   1   19.78    0.39 
  -7   2  -1   18.88    0.34 
   8  -2   1    8.32    0.18 
   8  -2   1    8.45    0.22 
  -8  -2  -1    8.38    0.22 
  -8   2  -1    7.20    0.20 
   8   2   1    7.07    0.22 
  -8   2  -1    7.32    0.18 
   8   2   1    7.83    0.21 
  -9  -2  -1    8.18    0.23 
   9  -2   1    7.94    0.19 
   9   2   1    8.42    0.25 
   9   2   1    8.30    0.23 
  -9   2  -1    8.40    0.22 
  -9   2  -1    8.62    0.21 
  10  -2   1    2.76    0.14 
 -10  -2  -1    2.63    0.15 
  10   2   1    3.61    0.16 
 -10   2  -1    3.86    0.15 
 -10   2  -1    3.74    0.15 
  10   2   1    3.67    0.17 
 -11  -2  -1   18.50    0.40 
  11  -2   1   18.21    0.40 
  11   2   1   16.63    0.37 
 -11   2  -1   16.65    0.36 
 -11   2  -1   17.50    0.36 
  11   2   1   16.64    0.39 
  12  -2   1    3.48    0.18 
 -12  -2  -1    3.51    0.18 
  12   2   1    3.32    0.18 
  12   2   1    3.54    0.17 
 -12   2  -1    3.60    0.16 
 -12   2  -1    3.21    0.16 
  13  -2   1    0.43    0.09 
 -13  -2  -1    0.29    0.09 
 -13   2  -1    0.78    0.10 
  13   2   1    0.75    0.11 
 -13   2  -1    0.59    0.10 
  13   2   1    0.90    0.12 
  14  -2   1    2.56    0.18 
 -14  -2  -1    2.49    0.19 
 -14   2  -1    2.14    0.16 
 -14   2  -1    2.27    0.16 
  14   2   1    2.24    0.18 
  14   2   1    2.57    0.18 
 -15  -2  -1    1.40    0.15 
  15  -2   1    1.49    0.17 
  15   2   1    2.21    0.19 
  15   2   1    2.09    0.18 
 -15   2  -1    1.77    0.16 
 -16  -2  -1    1.30    0.16 
  16  -2   1    0.98    0.14 
  16   2   1    1.27    0.15 
  16   2   1    1.41    0.16 
  17  -2   1    1.60    0.18 
 -17  -2  -1    1.57    0.17 
  18  -2   1    0.64    0.14 
  18   3  -1    1.07    0.17 
  17  -3  -1    2.17    0.22 
 -17  -3   1    2.08    0.23 
 -17   3   1    2.17    0.22 
  17   3  -1    2.59    0.24 
  16  -3  -1    3.43    0.22 
 -16  -3   1    3.45    0.24 
 -16   3   1    3.43    0.22 
  16   3  -1    3.71    0.24 
  15  -3  -1    1.75    0.18 
 -15  -3   1    1.73    0.20 
 -15   3   1    2.74    0.20 
  15   3  -1    1.83    0.19 
 -14  -3   1    3.41    0.22 
  14  -3  -1    3.40    0.21 
  14   3  -1    3.78    0.23 
 -14   3   1    3.95    0.22 
  13  -3  -1    8.00    0.27 
 -13  -3   1    7.63    0.28 
  13   3  -1    7.03    0.27 
 -13   3   1    6.80    0.25 
  12  -3  -1    3.89    0.20 
 -12  -3   1    3.71    0.20 
 -12   3   1    4.56    0.20 
  12   3  -1    4.54    0.20 
  12   3  -1    4.29    0.21 
 -11  -3   1    7.95    0.26 
  11  -3  -1    8.25    0.26 
  11   3  -1    6.83    0.24 
  11   3  -1    7.33    0.26 
 -11   3   1    6.88    0.24 
  10  -3  -1   10.38    0.28 
 -10  -3   1   10.55    0.29 
  10   3  -1   10.56    0.29 
  10   3  -1   10.35    0.29 
 -10   3   1   10.72    0.28 
  -9  -3   1    1.03    0.10 
   9  -3  -1    1.14    0.12 
   9  -3  -1    1.30    0.09 
   9   3  -1    0.58    0.09 
  -9   3   1    0.59    0.09 
   9   3  -1    0.45    0.08 
   8  -3  -1   20.82    0.42 
  -8  -3   1   21.79    0.42 
   8  -3  -1   21.32    0.38 
   8   3  -1   19.98    0.41 
   8   3  -1   19.46    0.40 
  -8   3   1   19.56    0.40 
  -7  -3   1   14.70    0.32 
  -7  -3   1   15.43    0.33 
   7  -3  -1   15.22    0.29 
   7  -3  -1   14.85    0.32 
  -7   3   1   15.66    0.33 
   7   3  -1   15.72    0.34 
  -7   3   1   15.69    0.28 
  -6  -3   1    4.57    0.10 
   6  -3  -1    4.20    0.15 
  -6  -3   1    4.38    0.15 
  -6  -3   1    4.57    0.16 
   6  -3  -1    4.51    0.13 
  -6   3   1    4.13    0.15 
  -6   3   1    4.25    0.11 
   6   3  -1    4.28    0.16 
  -5  -3   1    5.06    0.15 
   5  -3  -1    4.91    0.16 
   5  -3  -1    4.82    0.13 
  -5  -3   1    4.96    0.11 
  -5  -3   1    5.02    0.16 
  -5   3   1    7.04    0.15 
   5   3  -1    6.77    0.19 
  -5   3   1    6.63    0.18 
  -4  -3   1   16.44    0.32 
   4  -3  -1   16.25    0.32 
   4  -3  -1   16.29    0.30 
  -4  -3   1   15.87    0.31 
  -4  -3   1   16.45    0.27 
   4   3  -1   18.57    0.34 
  -4   3   1   18.49    0.30 
  -4   3   1   17.60    0.34 
  -3  -3   1   16.32    0.27 
  -3  -3   1   15.96    0.31 
   3  -3  -1   15.89    0.31 
  -3  -3   1   16.10    0.30 
   3  -3  -1   16.24    0.29 
  -3   3   1   14.69    0.25 
   3   3  -1   14.17    0.28 
  -3   3   1   14.48    0.28 
  -2  -3   1   55.77    0.83 
  -2  -3   1   56.12    0.81 
  -2  -3   1   55.97    0.84 
   2  -3  -1   56.38    0.85 
   2  -3  -1   56.62    0.83 
  -2   3   1   58.95    0.84 
   2   3  -1   60.09    0.88 
  -2   3   1   58.91    0.87 
  -1  -3   1    0.64    0.06 
   1  -3  -1    0.69    0.05 
  -1  -3   1    0.63    0.05 
   1  -3  -1    0.62    0.06 
  -1  -3   1    0.54    0.06 
  -1  -3   1    0.64    0.06 
   1  -3  -1    0.58    0.07 
  -1   3   1    1.18    0.07 
   0  -3   1   13.01    0.26 
   0  -3   1   13.23    0.24 
   0  -3  -1   13.25    0.23 
   0  -3   1   12.69    0.25 
   0  -3  -1   13.37    0.27 
   0  -3   1   13.12    0.25 
   0  -3  -1   13.00    0.26 
   0   3   1   12.35    0.23 
  -1  -3  -1    7.79    0.16 
   1  -3   1    7.60    0.18 
  -1  -3  -1    7.73    0.18 
   1  -3   1    7.83    0.17 
  -1  -3  -1    7.80    0.19 
   1  -3   1    7.75    0.17 
  -1   3  -1    9.29    0.20 
   1   3   1    9.53    0.18 
  -2  -3  -1    6.09    0.16 
   2  -3   1    6.09    0.14 
   2  -3   1    6.10    0.16 
  -2  -3  -1    6.25    0.15 
  -2   3  -1    8.14    0.18 
  -2   3  -1    8.47    0.19 
   2   3   1    8.20    0.20 
   2   3   1    8.23    0.16 
  -3  -3  -1   22.36    0.38 
   3  -3   1   22.55    0.40 
   3  -3   1   22.63    0.37 
  -3  -3  -1   23.33    0.41 
  -3   3  -1   21.60    0.38 
   3   3   1   21.91    0.40 
  -3   3  -1   22.04    0.37 
   3   3   1   22.01    0.34 
   4  -3   1   29.39    0.46 
  -4  -3  -1   30.46    0.50 
   4  -3   1   29.42    0.51 
  -4  -3  -1   30.70    0.51 
   4   3   1   29.19    0.42 
  -4   3  -1   28.92    0.49 
   4   3   1   29.04    0.50 
  -4   3  -1   28.89    0.46 
  -5  -3  -1    2.74    0.11 
  -5  -3  -1    2.72    0.12 
   5  -3   1    2.54    0.12 
   5  -3   1    2.70    0.09 
  -5   3  -1    1.91    0.11 
   5   3   1    1.77    0.11 
  -5   3  -1    1.97    0.09 
  -6  -3  -1   24.24    0.43 
   6  -3   1   23.60    0.44 
  -6  -3  -1   23.68    0.44 
   6  -3   1   24.03    0.38 
  -6   3  -1   23.26    0.39 
  -6   3  -1   22.69    0.42 
   6   3   1   23.03    0.45 
   7  -3   1    1.60    0.07 
  -7  -3  -1    1.55    0.11 
   7  -3   1    1.71    0.11 
  -7  -3  -1    1.70    0.11 
   7   3   1    1.45    0.12 
  -7   3  -1    1.63    0.09 
  -7   3  -1    1.50    0.11 
   8  -3   1   21.14    0.43 
  -8  -3  -1   21.71    0.43 
  -8  -3  -1   22.49    0.43 
  -8   3  -1   20.22    0.41 
   8   3   1   21.53    0.45 
  -8   3  -1   21.22    0.38 
  -9  -3  -1    8.87    0.25 
  -9  -3  -1    8.50    0.25 
   9  -3   1    9.05    0.26 
  -9   3  -1    7.90    0.21 
   9   3   1    9.06    0.25 
  -9   3  -1    9.06    0.25 
   9   3   1    8.94    0.27 
 -10  -3  -1   24.79    0.50 
  10  -3   1   25.02    0.50 
  10   3   1   28.77    0.57 
  10   3   1   27.78    0.54 
 -10   3  -1   29.11    0.54 
  11  -3   1    4.32    0.20 
 -11  -3  -1    4.48    0.20 
  11   3   1    4.89    0.22 
  11   3   1    4.97    0.21 
 -11   3  -1    5.09    0.21 
 -12  -3  -1    7.84    0.27 
  12  -3   1    8.66    0.28 
  12   3   1    7.72    0.28 
  12   3   1    7.78    0.27 
 -12   3  -1    7.39    0.26 
  13  -3   1    1.19    0.14 
 -13  -3  -1    1.09    0.14 
  13   3   1    2.34    0.18 
 -13   3  -1    2.06    0.17 
  13   3   1    2.27    0.18 
 -14  -3  -1    6.55    0.27 
  14  -3   1    6.40    0.27 
  14   3   1    6.61    0.27 
 -14   3  -1    6.82    0.26 
  14   3   1    6.79    0.28 
  15  -3   1    0.40    0.12 
 -15  -3  -1    0.42    0.12 
 -15   3  -1    0.38    0.11 
  15   3   1    0.28    0.11 
  16  -3   1    2.38    0.21 
 -16  -3  -1    1.94    0.21 
 -16   3  -1    2.32    0.21 
  16   3   1    1.94    0.20 
  17  -3   1    0.54    0.14 
 -17   3  -1    0.53    0.14 
  17   3   1    0.63    0.15 
  16  -4  -1    1.27    0.17 
  16   4  -1    1.47    0.19 
 -16   4   1    1.55    0.18 
 -15  -4   1    2.18    0.22 
  15  -4  -1    2.47    0.22 
 -15   4   1    1.66    0.18 
  15   4  -1    1.41    0.18 
  14  -4  -1    2.42    0.21 
 -14  -4   1    2.41    0.21 
  14   4  -1    2.61    0.22 
 -14   4   1    2.39    0.21 
 -13  -4   1    0.43    0.12 
  13  -4  -1    0.57    0.12 
  13   4  -1    0.91    0.14 
 -13   4   1    1.03    0.14 
 -12  -4   1    6.54    0.27 
  12  -4  -1    6.93    0.27 
 -12   4   1    7.92    0.29 
  12   4  -1    7.92    0.30 
  11  -4  -1    6.56    0.25 
 -11  -4   1    6.25    0.25 
  11   4  -1    5.47    0.24 
 -11   4   1    5.58    0.24 
  11   4  -1    5.38    0.24 
  10  -4  -1    5.74    0.23 
 -10  -4   1    5.68    0.23 
 -10   4   1    6.37    0.24 
  10   4  -1    6.56    0.25 
  10   4  -1    6.25    0.24 
   9  -4  -1    2.43    0.16 
  -9  -4   1    2.04    0.15 
   9   4  -1    2.46    0.17 
   9   4  -1    2.59    0.16 
  -9   4   1    2.41    0.16 
  -8  -4   1    3.95    0.18 
  -8  -4   1    3.91    0.18 
   8  -4  -1    4.38    0.19 
  -8   4   1    3.94    0.18 
   8   4  -1    3.72    0.18 
  -7  -4   1    4.50    0.18 
  -7  -4   1    4.61    0.19 
   7  -4  -1    4.81    0.15 
   7  -4  -1    4.97    0.19 
   7   4  -1    6.06    0.21 
  -7   4   1    5.97    0.21 
   6  -4  -1    8.05    0.24 
   6  -4  -1    7.98    0.20 
  -6  -4   1    7.57    0.22 
  -6  -4   1    7.40    0.23 
  -6   4   1    7.60    0.23 
   6   4  -1    8.28    0.24 
   5  -4  -1    3.34    0.15 
   5  -4  -1    3.29    0.13 
  -5  -4   1    3.37    0.15 
  -5  -4   1    3.25    0.14 
   5   4  -1    3.81    0.16 
  -5   4   1    3.73    0.16 
  -4  -4   1    6.63    0.19 
  -4  -4   1    6.83    0.20 
   4  -4  -1    7.24    0.19 
   4  -4  -1    7.03    0.21 
  -4   4   1    7.23    0.21 
   4   4  -1    7.15    0.16 
   4   4  -1    7.37    0.21 
   3  -4  -1    9.98    0.23 
   3  -4  -1   10.53    0.26 
  -3  -4   1   10.19    0.24 
  -3  -4   1   10.53    0.25 
  -3   4   1   11.03    0.25 
   3   4  -1   10.78    0.26 
   3   4  -1   10.72    0.22 
   2  -4  -1    5.14    0.17 
   2  -4  -1    5.01    0.16 
  -2  -4   1    5.63    0.17 
  -2  -4   1    5.06    0.16 
   2   4  -1    4.93    0.17 
   2   4  -1    5.05    0.14 
  -2   4   1    4.84    0.14 
  -2   4   1    4.78    0.15 
   1  -4  -1   18.16    0.35 
   1  -4  -1   18.48    0.32 
  -1  -4   1   18.21    0.34 
  -1  -4   1   18.05    0.36 
  -1  -4   1   18.10    0.35 
   1  -4  -1   18.17    0.37 
  -1   4   1   18.14    0.34 
   1   4  -1   18.40    0.33 
   0  -4  -1    6.78    0.16 
   0  -4   1    6.67    0.17 
   0  -4  -1    6.82    0.19 
   0  -4   1    6.65    0.18 
   0  -4   1    6.50    0.19 
   0  -4  -1    6.35    0.20 
   0   4  -1    5.87    0.16 
   0   4   1    5.96    0.16 
   1  -4   1   12.81    0.27 
   1  -4   1   12.38    0.29 
  -1  -4  -1   13.05    0.29 
  -1  -4  -1   13.48    0.30 
  -1  -4  -1   13.97    0.26 
  -1   4  -1   12.67    0.27 
  -1   4  -1   13.03    0.26 
   1   4   1   12.68    0.25 
   2  -4   1    8.70    0.23 
  -2  -4  -1    8.70    0.23 
   2  -4   1    8.64    0.20 
  -2  -4  -1    8.86    0.20 
  -2   4  -1    7.80    0.19 
   2   4   1    8.03    0.18 
  -2   4  -1    7.72    0.20 
   2   4   1    8.27    0.22 
   3  -4   1    6.83    0.21 
  -3  -4  -1    6.90    0.18 
   3  -4   1    6.83    0.17 
  -3  -4  -1    6.86    0.20 
  -3   4  -1    7.56    0.19 
   3   4   1    7.96    0.22 
   3   4   1    7.81    0.17 
  -3   4  -1    7.54    0.21 
   4  -4   1   11.41    0.23 
  -4  -4  -1   10.67    0.27 
  -4  -4  -1   10.76    0.25 
   4  -4   1   10.94    0.27 
  -4   4  -1   12.29    0.28 
  -4   4  -1   12.15    0.26 
   4   4   1   11.63    0.29 
   5  -4   1    4.15    0.13 
  -5  -4  -1    4.07    0.15 
   5  -4   1    3.96    0.17 
  -5  -4  -1    4.25    0.17 
  -5   4  -1    4.96    0.18 
   5   4   1    4.72    0.18 
  -6  -4  -1    0.85    0.10 
  -6  -4  -1    0.79    0.09 
   6  -4   1    0.77    0.09 
  -6   4  -1    1.00    0.11 
   6   4   1    1.01    0.11 
   7  -4   1    5.52    0.20 
  -7  -4  -1    5.68    0.20 
  -7  -4  -1    5.37    0.19 
  -7   4  -1    6.11    0.21 
   7   4   1    6.02    0.23 
   8  -4   1    2.02    0.15 
  -8  -4  -1    2.12    0.14 
  -8  -4  -1    2.31    0.16 
  -8   4  -1    2.78    0.17 
   8   4   1    3.00    0.18 
  -9  -4  -1    3.77    0.19 
  -9  -4  -1    3.48    0.18 
   9  -4   1    3.59    0.19 
   9   4   1    4.73    0.22 
  -9   4  -1    4.81    0.20 
 -10  -4  -1    2.98    0.18 
  10  -4   1    3.34    0.19 
  10   4   1    2.43    0.18 
  10   4   1    2.61    0.19 
 -10   4  -1    2.58    0.17 
 -11  -4  -1    2.01    0.17 
  11  -4   1    1.75    0.16 
 -11   4  -1    0.86    0.13 
  11   4   1    0.73    0.12 
  11   4   1    1.00    0.14 
  12  -4   1    2.12    0.19 
 -12  -4  -1    2.42    0.18 
  12   4   1    1.60    0.18 
  12   4   1    1.53    0.17 
 -12   4  -1    1.56    0.17 
  13  -4   1    7.48    0.29 
 -13  -4  -1    7.18    0.29 
  13   4   1    7.77    0.31 
  13   4   1    7.02    0.30 
 -13   4  -1    7.31    0.29 
 -14  -4  -1    2.38    0.21 
  14  -4   1    2.38    0.20 
 -14   4  -1    2.27    0.21 
  14   4   1    2.33    0.22 
  15  -4   1    3.61    0.25 
 -15  -4  -1    2.96    0.24 
  15   4   1    3.44    0.24 
 -15   4  -1    3.57    0.25 
 -16   4  -1    0.36    0.13 
  16   4   1    0.19    0.12 
  14  -5  -1    3.59    0.26 
 -14  -5   1    3.97    0.26 
 -14   5   1    4.23    0.27 
  14   5  -1    5.00    0.30 
  13  -5  -1    1.02    0.15 
 -13  -5   1    0.90    0.15 
  13   5  -1    1.36    0.18 
 -13   5   1    1.57    0.18 
  12  -5  -1    0.50    0.13 
 -12  -5   1    0.66    0.13 
  12   5  -1    0.41    0.13 
 -12   5   1    0.29    0.12 
  11  -5  -1    5.35    0.26 
 -11  -5   1    4.76    0.24 
  11   5  -1    4.60    0.26 
 -11   5   1    4.34    0.23 
  10  -5  -1    2.63    0.20 
 -10  -5   1    2.85    0.20 
 -10   5   1    3.52    0.22 
  10   5  -1    3.04    0.21 
   9  -5  -1    0.19    0.10 
  -9  -5   1    0.16    0.09 
   9   5  -1   -0.04    0.08 
   9   5  -1   -0.03    0.09 
  -9   5   1    0.06    0.09 
  -8  -5   1    4.60    0.21 
   8  -5  -1    4.43    0.22 
  -8  -5   1    4.52    0.22 
   8   5  -1    3.93    0.21 
  -8   5   1    4.05    0.21 
  -7  -5   1    3.80    0.20 
   7  -5  -1    3.87    0.20 
  -7  -5   1    3.71    0.18 
   7   5  -1    3.86    0.20 
  -7   5   1    3.52    0.19 
  -6  -5   1    3.52    0.19 
  -6  -5   1    3.98    0.18 
   6  -5  -1    3.74    0.19 
  -6   5   1    2.82    0.17 
   6   5  -1    2.86    0.17 
  -5  -5   1    1.97    0.13 
   5  -5  -1    1.95    0.15 
  -5  -5   1    2.01    0.15 
   5  -5  -1    2.35    0.13 
   5   5  -1    2.51    0.16 
  -5   5   1    2.47    0.15 
  -4  -5   1    8.71    0.24 
  -4  -5   1    8.58    0.26 
   4  -5  -1    8.45    0.27 
   4  -5  -1    9.08    0.24 
  -4   5   1    8.46    0.25 
   4   5  -1    8.44    0.26 
  -3  -5   1    1.29    0.12 
   3  -5  -1    1.30    0.11 
   3  -5  -1    1.23    0.12 
  -3  -5   1    1.39    0.11 
   3   5  -1    1.17    0.13 
  -3   5   1    0.91    0.10 
  -2  -5   1    9.27    0.24 
  -2  -5   1    9.02    0.25 
   2  -5  -1    9.32    0.25 
   2  -5  -1    9.25    0.27 
  -2   5   1    9.61    0.25 
   2   5  -1    9.48    0.23 
   2   5  -1    9.39    0.27 
   1  -5  -1    1.38    0.13 
  -1  -5   1    1.37    0.11 
   1  -5  -1    1.28    0.11 
  -1  -5   1    1.09    0.12 
  -1  -5   1    1.36    0.10 
   1   5  -1    1.09    0.10 
  -1   5   1    1.19    0.10 
   0  -5  -1   13.14    0.31 
   0  -5   1   13.48    0.29 
   0  -5   1   13.31    0.30 
   0  -5  -1   13.31    0.33 
   0  -5   1   12.79    0.32 
   0   5   1   14.06    0.30 
   0   5  -1   12.98    0.30 
   1  -5   1    2.76    0.14 
   1  -5   1    3.21    0.17 
  -1  -5  -1    2.89    0.15 
  -1   5  -1    3.36    0.15 
   1   5   1    3.38    0.17 
   1   5   1    3.37    0.13 
  -2  -5  -1    6.55    0.22 
  -2  -5  -1    6.82    0.19 
   2  -5   1    6.41    0.20 
   2  -5   1    6.55    0.22 
  -2   5  -1    5.60    0.19 
   2   5   1    5.73    0.21 
  -3  -5  -1    4.04    0.15 
   3  -5   1    3.84    0.15 
   3  -5   1    3.94    0.18 
  -3  -5  -1    3.67    0.17 
   3   5   1    2.99    0.17 
  -3   5  -1    2.52    0.14 
  -4  -5  -1    7.71    0.22 
   4  -5   1    7.52    0.21 
   4  -5   1    7.69    0.25 
  -4  -5  -1    7.77    0.25 
  -4   5  -1    6.80    0.23 
   4   5   1    6.56    0.24 
  -5  -5  -1    4.01    0.19 
  -5  -5  -1    4.63    0.18 
   5  -5   1    3.73    0.19 
   5   5   1    4.43    0.21 
  -5   5  -1    4.28    0.19 
  -6  -5  -1    4.67    0.21 
  -6  -5  -1    4.21    0.18 
   6  -5   1    4.19    0.20 
   6   5   1    3.99    0.20 
  -6   5  -1    4.01    0.20 
   7  -5   1    3.30    0.20 
  -7  -5  -1    3.17    0.19 
  -7  -5  -1    3.50    0.18 
   7   5   1    3.37    0.20 
  -7   5  -1    3.07    0.18 
   8  -5   1    3.84    0.21 
  -8  -5  -1    3.84    0.21 
  -8  -5  -1    3.77    0.19 
   8   5   1    2.84    0.19 
  -8   5  -1    3.20    0.20 
  -9  -5  -1    0.46    0.11 
   9  -5   1    0.53    0.11 
  -9  -5  -1    0.34    0.10 
  -9   5  -1    1.02    0.13 
   9   5   1    0.99    0.14 
  10  -5   1    6.35    0.27 
 -10  -5  -1    6.30    0.26 
 -10  -5  -1    6.33    0.27 
 -10   5  -1    6.97    0.28 
  10   5   1    6.89    0.28 
  10   5   1    6.95    0.29 
 -11  -5  -1    2.33    0.19 
  11  -5   1    2.75    0.21 
  11   5   1    1.89    0.20 
 -11   5  -1    2.69    0.21 
  11   5   1    2.42    0.21 
 -12  -5  -1    4.28    0.25 
  12  -5   1    4.35    0.25 
 -12   5  -1    5.20    0.27 
  12   5   1    5.12    0.28 
 -13  -5  -1    1.83    0.21 
  13  -5   1    1.93    0.22 
  13   5   1    2.58    0.24 
 -13   5  -1    2.39    0.22 
 -14  -5  -1    4.20    0.28 
 -14   5  -1    3.41    0.29 
  14   5   1    3.49    0.29 
 -12  -6   1    3.90    0.26 
 -11  -6   1    2.05    0.22 
  11  -6  -1    1.75    0.19 
 -11   6   1    2.44    0.24 
  11   6  -1    2.42    0.24 
  10  -6  -1    1.67    0.18 
 -10  -6   1    1.79    0.20 
 -10   6   1    1.89    0.21 
  10   6  -1    1.97    0.21 
   9  -6  -1    2.73    0.22 
  -9  -6   1    2.90    0.21 
  -9   6   1    2.71    0.22 
   9   6  -1    2.90    0.23 
  -8  -6   1    2.22    0.18 
   8  -6  -1    1.79    0.19 
  -8  -6   1    1.70    0.19 
  -8   6   1    2.08    0.20 
   7  -6  -1    0.42    0.11 
  -7  -6   1    0.46    0.10 
  -7  -6   1    0.50    0.12 
   7   6  -1    0.40    0.11 
  -7   6   1    0.43    0.12 
  -6  -6   1    0.03    0.09 
   6  -6  -1    0.10    0.09 
  -6  -6   1    0.01    0.08 
  -6   6   1    0.01    0.09 
   6   6  -1    0.03    0.09 
   5  -6  -1    0.68    0.12 
  -5  -6   1    0.84    0.16 
  -5  -6   1    0.60    0.11 
  -5   6   1    1.20    0.14 
   5   6  -1    1.29    0.14 
   4  -6  -1    0.34    0.10 
  -4  -6   1    0.29    0.09 
   4   6  -1    0.51    0.11 
  -4   6   1    0.61    0.11 
   3  -6  -1    6.66    0.26 
   3  -6  -1    6.98    0.23 
  -3  -6   1    7.11    0.25 
  -3   6   1    6.87    0.24 
   3   6  -1    7.39    0.27 
   2  -6  -1    0.65    0.12 
   2  -6  -1    0.85    0.11 
  -2  -6   1    0.62    0.11 
  -2   6   1    0.75    0.10 
   2   6  -1    0.56    0.11 
   1  -6  -1    9.36    0.28 
   1  -6  -1    8.96    0.30 
  -1  -6   1    9.22    0.28 
  -1   6   1    8.80    0.26 
   1   6  -1    8.69    0.29 
   0  -6  -1    1.16    0.12 
   0  -6   1    1.22    0.13 
   0  -6   1    1.27    0.13 
   0   6  -1    1.80    0.14 
   0   6   1    1.67    0.16 
   1  -6   1    2.66    0.16 
   1  -6   1    2.90    0.18 
  -1  -6  -1    2.63    0.17 
   1   6   1    2.91    0.18 
  -1   6  -1    3.01    0.17 
   2  -6   1    4.00    0.21 
  -2  -6  -1    4.68    0.21 
   2  -6   1    4.50    0.19 
   2   6   1    4.77    0.23 
  -2   6  -1    4.87    0.20 
   3  -6   1    5.17    0.23 
  -3  -6  -1    5.74    0.24 
  -3   6  -1    5.47    0.22 
   3   6   1    5.15    0.24 
  -4  -6  -1    2.14    0.18 
   4  -6   1    2.44    0.18 
  -4   6  -1    2.36    0.17 
   4   6   1    2.42    0.19 
  -5  -6  -1    5.66    0.25 
   5  -6   1    5.68    0.25 
  -5   6  -1    5.69    0.24 
   5   6   1    5.77    0.25 
  -6  -6  -1    1.92    0.19 
   6  -6   1    2.15    0.19 
  -6   6  -1    1.74    0.18 
   6   6   1    1.65    0.18 
  -7  -6  -1    3.60    0.22 
   7  -6   1    3.63    0.23 
  -7  -6  -1    3.80    0.28 
   7   6   1    4.35    0.25 
  -7   6  -1    4.89    0.24 
  -8  -6  -1    0.23    0.11 
   8  -6   1    0.41    0.12 
  -8  -6  -1    0.25    0.10 
  -8   6  -1    0.36    0.12 
   8   6   1    0.47    0.12 
  -9  -6  -1   -0.14    0.09 
   9  -6   1   -0.04    0.11 
  -9  -6  -1   -0.08    0.09 
  -9   6  -1    0.00    0.11 
   9   6   1    0.05    0.11 
 -10  -6  -1    1.56    0.17 
  10  -6   1    1.44    0.17 
  10   6   1    1.09    0.16 
 -10   6  -1    0.98    0.16 
 -11  -6  -1    2.85    0.23 
  11  -6   1    2.93    0.24 
  11   6   1    1.60    0.19 
 -11   6  -1    1.38    0.18 
 -12  -6  -1    2.18    0.23 
  -8   7   1    0.54    0.16 
  -7  -7   1    0.46    0.14 
   7  -7  -1    0.69    0.15 
  -7   7   1    0.88    0.15 
  -6  -7   1    1.10    0.16 
   6  -7  -1    0.80    0.15 
  -6   7   1    1.10    0.15 
   5  -7  -1   -0.10    0.11 
  -5  -7   1    0.06    0.10 
  -5   7   1    0.12    0.11 
   5   7  -1   -0.03    0.11 
  -4  -7   1    2.12    0.20 
   4  -7  -1    1.88    0.21 
  -4   7   1    1.70    0.19 
   4   7  -1    1.52    0.17 
   3  -7  -1    1.08    0.16 
  -3  -7   1    1.23    0.15 
  -3   7   1    1.15    0.14 
   3   7  -1    1.28    0.16 
   2  -7  -1    4.12    0.24 
  -2  -7   1    4.34    0.23 
   2   7  -1    4.84    0.25 
   1  -7  -1    0.49    0.11 
  -1  -7   1    0.33    0.11 
   1   7  -1    0.11    0.10 
  -1   7   1    0.30    0.12 
   0  -7   1    5.75    0.38 
   0  -7  -1    5.30    0.25 
   0   7  -1    5.38    0.26 
   0   7   1    5.46    0.27 
  -1  -7  -1    0.84    0.13 
   1  -7   1    1.05    0.15 
   1   7   1    0.74    0.14 
   2  -7   1    2.52    0.22 
  -2  -7  -1    2.26    0.20 
  -2   7  -1    2.50    0.21 
   2   7   1    2.62    0.22 
   3  -7   1    2.60    0.22 
  -3  -7  -1    2.24    0.20 
   3   7   1    3.03    0.22 
  -3   7  -1    2.61    0.20 
   4  -7   1    0.67    0.14 
  -4  -7  -1    0.45    0.12 
  -4   7  -1    0.28    0.11 
   4   7   1    0.11    0.12 
   5  -7   1    0.80    0.15 
  -5  -7  -1    0.97    0.15 
  -5   7  -1    0.48    0.13 
   5   7   1    0.49    0.14 
  -6  -7  -1    1.18    0.16 
   6  -7   1    1.13    0.16 
   6   7   1    1.37    0.18 
  -6   7  -1    0.92    0.15 
   7  -7   1    0.36    0.14 
  -7  -7  -1    0.61    0.14 
  -7   7  -1    0.64    0.15 
   7   7   1    0.60    0.16 
 -19   0   2   -0.01    0.11 
 -18   0   2    0.87    0.14 
 -17   0   2    4.65    0.24 
  16   0  -2    3.96    0.20 
 -16   0   2    4.12    0.22 
  15   0  -2   17.69    0.43 
  15   0  -2   17.79    0.41 
 -15   0   2   17.67    0.42 
  14   0  -2    1.54    0.15 
 -14   0   2    1.70    0.15 
  14   0  -2    1.69    0.14 
  13   0  -2   10.99    0.30 
 -13   0   2   11.22    0.29 
 -13   0   2   10.71    0.27 
  13   0  -2   10.69    0.28 
 -12   0   2    0.87    0.10 
  12   0  -2    0.76    0.09 
 -12   0   2    0.89    0.09 
  12   0  -2    0.88    0.10 
  11   0  -2    6.18    0.19 
 -11   0   2    5.98    0.17 
  11   0  -2    6.20    0.20 
 -11   0   2    6.33    0.19 
 -10   0   2    2.94    0.11 
  10   0  -2    2.54    0.12 
 -10   0   2    2.83    0.13 
  10   0  -2    2.50    0.12 
   9   0  -2    7.79    0.20 
   9   0  -2    8.07    0.20 
  -9   0   2    7.95    0.18 
  -9   0   2    7.27    0.19 
  -8   0   2    1.04    0.08 
  -8   0   2    1.20    0.07 
   8   0  -2    1.16    0.08 
   8   0  -2    1.17    0.08 
   7   0  -2    0.08    0.03 
  -7   0   2    0.08    0.03 
  -7   0   2    0.14    0.03 
   7   0  -2    0.10    0.04 
   6   0  -2    0.05    0.03 
  -6   0   2    0.11    0.03 
  -6   0   2    0.05    0.03 
   6   0  -2    0.07    0.03 
   5   0  -2    6.15    0.14 
   5   0  -2    6.19    0.13 
  -5   0   2    6.24    0.13 
  -5   0   2    6.33    0.13 
  -4   0   2  997.73   13.35 
   4   0  -2  977.60   13.42 
  -4   0   2 1000.00   13.33 
   4   0  -2  979.35   13.33 
   3   0  -2    1.15    0.04 
  -3   0   2    1.01    0.04 
  -3   0   2    1.17    0.04 
   3   0  -2    1.17    0.05 
   2   0  -2    9.90    0.15 
  -2   0   2    9.73    0.15 
   2   0  -2    9.68    0.17 
  -2   0   2    9.79    0.16 
  -1   0   2    0.81    0.02 
   1   0  -2    0.80    0.02 
   1   0  -2    0.85    0.03 
   0   0   2   14.89    0.22 
   0   0  -2   14.85    0.22 
   0   0   2   14.97    0.23 
   0   0  -2   14.99    0.22 
  -1   0  -2   57.26    0.78 
   1   0   2   57.09    0.77 
  -1   0  -2   56.68    0.77 
   1   0   2   56.59    0.79 
   2   0   2   53.57    0.78 
  -2   0  -2   54.15    0.77 
   2   0   2   56.41    0.75 
  -2   0  -2   56.03    0.75 
  -3   0  -2   45.08    0.63 
   3   0   2   46.79    0.63 
  -3   0  -2   44.87    0.65 
   4   0   2   17.62    0.30 
  -4   0  -2   17.68    0.27 
   4   0   2   17.67    0.27 
  -4   0  -2   16.80    0.29 
   5   0   2    0.11    0.04 
  -5   0  -2    0.14    0.03 
   5   0   2    0.21    0.03 
  -5   0  -2    0.13    0.02 
   6   0   2    4.80    0.14 
   6   0   2    5.00    0.12 
  -6   0  -2    4.73    0.13 
  -6   0  -2    4.88    0.11 
  -7   0  -2    0.96    0.07 
   7   0   2    1.04    0.06 
  -7   0  -2    1.14    0.06 
   7   0   2    1.08    0.08 
   8   0   2    0.79    0.06 
  -8   0  -2    0.64    0.08 
   8   0   2    0.73    0.08 
  -8   0  -2    0.76    0.06 
  -9   0  -2    0.05    0.03 
   9   0   2    0.18    0.04 
  -9   0  -2    0.11    0.05 
   9   0   2    0.09    0.05 
  10   0   2   35.35    0.63 
 -10   0  -2   35.58    0.61 
  10   0   2   36.50    0.59 
 -10   0  -2   37.06    0.57 
  11   0   2    7.83    0.21 
 -11   0  -2    8.52    0.20 
 -11   0  -2    8.22    0.23 
  11   0   2    7.63    0.24 
 -12   0  -2   16.87    0.38 
  12   0   2   17.25    0.36 
  12   0   2   16.54    0.38 
 -13   0  -2    0.61    0.10 
  13   0   2    0.46    0.09 
 -14   0  -2   10.84    0.32 
  14   0   2   11.14    0.33 
 -15   0  -2    1.44    0.16 
  15   0   2    1.32    0.14 
 -16   0  -2    3.41    0.22 
  16   0   2    3.35    0.22 
  17   0   2    4.07    0.23 
 -17   0  -2    3.73    0.24 
  18   0   2    2.99    0.24 
 -18   0  -2    3.23    0.24 
  19   0   2    1.63    0.18 
 -19  -1   2    0.98    0.19 
  18  -1  -2    5.84    0.34 
 -18  -1   2    6.47    0.30 
 -17  -1   2    3.79    0.24 
  17  -1  -2    4.03    0.22 
  17   1  -2    3.11    0.25 
 -16  -1   2    9.35    0.32 
  16  -1  -2    9.60    0.30 
  16   1  -2    8.82    0.31 
 -16   1   2    8.62    0.29 
  15  -1  -2    2.56    0.17 
 -15  -1   2    2.40    0.18 
 -15   1   2    2.97    0.27 
  15   1  -2    2.14    0.17 
  15   1  -2    2.70    0.17 
 -15   1   2    2.51    0.16 
 -14  -1   2   11.49    0.32 
  14  -1  -2   11.12    0.30 
  14   1  -2   11.05    0.29 
  14   1  -2   10.29    0.31 
 -14   1   2   10.31    0.28 
 -14   1   2   10.06    0.28 
 -13  -1   2    1.12    0.12 
  13  -1  -2    1.15    0.12 
  13  -1  -2    1.21    0.13 
 -13   1   2    1.09    0.11 
 -13   1   2    0.74    0.09 
  13   1  -2    1.00    0.11 
  13   1  -2    0.86    0.10 
  12  -1  -2   23.62    0.48 
 -12  -1   2   23.58    0.47 
  12  -1  -2   23.88    0.46 
  12   1  -2   27.03    0.51 
 -12   1   2   25.78    0.48 
 -12   1   2   24.98    0.47 
  12   1  -2   26.00    0.49 
 -11  -1   2    6.24    0.21 
  11  -1  -2    6.54    0.21 
  11  -1  -2    6.62    0.20 
  11   1  -2    6.73    0.22 
 -11   1   2    7.16    0.20 
 -11   1   2    7.19    0.20 
  11   1  -2    7.23    0.21 
  10  -1  -2    5.92    0.18 
 -10  -1   2    5.96    0.15 
 -10  -1   2    5.97    0.19 
  10  -1  -2    5.91    0.19 
 -10   1   2    5.60    0.17 
  10   1  -2    5.85    0.19 
 -10   1   2    5.97    0.17 
  10   1  -2    5.29    0.17 
   9  -1  -2    8.13    0.22 
   9  -1  -2    8.31    0.20 
  -9  -1   2    8.33    0.21 
  -9  -1   2    8.59    0.18 
  -9   1   2    7.41    0.18 
   9   1  -2    7.49    0.20 
  -9   1   2    7.27    0.19 
   9   1  -2    7.90    0.20 
   8  -1  -2   40.54    0.64 
   8  -1  -2   41.04    0.65 
  -8  -1   2   39.75    0.64 
  -8  -1   2   40.60    0.61 
  -8   1   2   36.99    0.59 
   8   1  -2   37.17    0.60 
   8   1  -2   36.50    0.59 
  -8   1   2   37.17    0.57 
  -7  -1   2    5.64    0.15 
   7  -1  -2    5.48    0.16 
   7  -1  -2    5.56    0.14 
  -7  -1   2    5.45    0.13 
   7   1  -2    6.45    0.17 
   7   1  -2    6.18    0.16 
  -7   1   2    6.41    0.16 
  -7   1   2    6.33    0.15 
   6  -1  -2   21.90    0.38 
   6  -1  -2   21.80    0.36 
  -6  -1   2   21.96    0.37 
  -6  -1   2   22.08    0.35 
  -6   1   2   19.24    0.31 
   6   1  -2   19.04    0.33 
  -6   1   2   18.86    0.33 
   6   1  -2   18.63    0.33 
  -5  -1   2    7.28    0.15 
   5  -1  -2    7.13    0.17 
  -5  -1   2    7.07    0.16 
   5  -1  -2    7.32    0.15 
   5   1  -2    4.14    0.12 
  -5   1   2    4.29    0.11 
   5   1  -2    4.00    0.11 
  -5   1   2    4.30    0.10 
  -4  -1   2  161.74    2.17 
   4  -1  -2  158.12    2.19 
   4  -1  -2  162.23    2.17 
  -4  -1   2  157.46    2.18 
   4   1  -2  167.49    2.31 
  -4   1   2  176.76    2.29 
   4   1  -2  167.43    2.32 
  -4   1   2  168.69    2.31 
   3  -1  -2   89.98    1.27 
  -3  -1   2   90.56    1.25 
   3  -1  -2   91.43    1.25 
  -3  -1   2   90.40    1.25 
  -3   1   2   96.53    1.35 
   3   1  -2   97.04    1.34 
   3   1  -2   96.03    1.35 
  -3   1   2  101.04    1.31 
  -2  -1   2  369.81    5.10 
   2  -1  -2  385.26    5.11 
  -2  -1   2  376.15    5.09 
   2  -1  -2  358.43    5.17 
   2   1  -2  350.82    4.78 
   2   1  -2  354.08    4.76 
  -1  -1   2   64.60    0.89 
   1  -1  -2   65.59    0.90 
  -1  -1   2   64.09    0.89 
   1  -1  -2   64.73    0.89 
  -1  -1   2   63.32    0.89 
  -1  -1   2   64.94    0.88 
  -1   1   2   70.11    0.96 
   0  -1   2  172.04    2.33 
   0  -1   2  165.96    2.31 
   0  -1   2  169.14    2.34 
   0  -1  -2  172.64    2.31 
   0  -1   2  175.54    2.32 
   0  -1  -2  176.45    2.32 
   0  -1  -2  167.02    2.30 
   0   1   2  168.17    2.30 
  -1  -1  -2   16.77    0.27 
   1  -1   2   17.44    0.24 
  -1  -1  -2   17.40    0.26 
   1  -1   2   17.10    0.27 
   1  -1   2   16.82    0.26 
  -1   1  -2   19.20    0.30 
   1   1   2   19.19    0.27 
   1   1   2   18.72    0.30 
   2  -1   2   56.61    0.81 
   2  -1   2   58.59    0.81 
  -2  -1  -2   57.98    0.81 
   2  -1   2   57.53    0.78 
  -2  -1  -2   58.11    0.81 
   2   1   2   58.91    0.84 
  -2   1  -2   58.55    0.83 
  -3  -1  -2   18.19    0.29 
  -3  -1  -2   18.24    0.29 
   3  -1   2   18.11    0.30 
   3  -1   2   18.04    0.29 
   3  -1   2   18.67    0.26 
  -3   1  -2   19.01    0.31 
  -4  -1  -2   23.79    0.38 
  -4  -1  -2   23.99    0.38 
   4  -1   2   23.83    0.39 
   4  -1   2   23.86    0.35 
  -4   1  -2   25.32    0.40 
   4   1   2   25.56    0.43 
  -4   1  -2   25.20    0.39 
   5  -1   2    2.38    0.07 
  -5  -1  -2    2.29    0.08 
  -5  -1  -2    2.32    0.09 
   5   1   2    3.44    0.12 
  -5   1  -2    3.32    0.10 
  -5   1  -2    3.35    0.10 
   6  -1   2    5.58    0.14 
  -6  -1  -2    4.77    0.09 
   6  -1   2    4.59    0.11 
  -6  -1  -2    4.79    0.14 
  -6  -1  -2    4.58    0.13 
  -6   1  -2    5.06    0.13 
   6   1   2    5.19    0.16 
  -6   1  -2    4.90    0.14 
   7  -1   2    4.48    0.14 
  -7  -1  -2    4.53    0.09 
  -7  -1  -2    4.59    0.14 
   7  -1   2    4.74    0.12 
  -7   1  -2    4.31    0.13 
  -7   1  -2    4.16    0.12 
   7   1   2    4.14    0.12 
   7   1   2    4.23    0.15 
  -8  -1  -2    1.68    0.06 
  -8  -1  -2    1.68    0.10 
   8  -1   2    1.52    0.08 
   8  -1   2    1.46    0.09 
  -8   1  -2    0.96    0.08 
  -8   1  -2    0.89    0.07 
   8   1   2    0.99    0.08 
   8   1   2    0.97    0.10 
   9  -1   2    5.66    0.15 
   9  -1   2    5.28    0.18 
  -9  -1  -2    5.65    0.18 
  -9  -1  -2    5.82    0.12 
  -9   1  -2    6.42    0.17 
  -9   1  -2    6.17    0.18 
   9   1   2    6.50    0.18 
   9   1   2    6.48    0.21 
  10  -1   2    1.87    0.10 
 -10  -1  -2    1.95    0.13 
  10  -1   2    1.94    0.12 
  10   1   2    2.80    0.15 
 -10   1  -2    2.94    0.12 
 -10   1  -2    2.49    0.13 
  10   1   2    2.64    0.12 
 -11  -1  -2    6.91    0.23 
  11  -1   2    7.24    0.22 
  11   1   2    7.65    0.22 
  11   1   2    7.31    0.24 
 -11   1  -2    7.33    0.22 
 -11   1  -2    7.74    0.20 
 -12  -1  -2    1.28    0.13 
  12  -1   2    1.37    0.13 
  12   1   2    1.45    0.14 
  12   1   2    1.33    0.12 
 -12   1  -2    1.52    0.13 
 -12   1  -2    1.72    0.12 
  13  -1   2   15.10    0.37 
 -13  -1  -2   15.25    0.37 
  13   1   2   17.34    0.41 
 -13   1  -2   16.78    0.36 
 -13   1  -2   16.86    0.39 
  13   1   2   17.68    0.39 
 -14  -1  -2    2.08    0.17 
  14  -1   2    2.28    0.17 
 -14   1  -2    2.74    0.18 
  14   1   2    2.85    0.17 
  14   1   2    2.51    0.18 
  15  -1   2   13.02    0.37 
 -15  -1  -2   13.37    0.37 
  15   1   2   13.98    0.39 
 -15   1  -2   13.44    0.36 
 -16  -1  -2    4.82    0.25 
  16  -1   2    4.82    0.24 
  16   1   2    4.36    0.24 
 -16   1  -2    3.95    0.22 
  17  -1   2    2.47    0.20 
 -17  -1  -2    2.25    0.22 
 -17   1  -2    1.26    0.15 
  17   1   2    1.41    0.17 
 -18  -1  -2    1.19    0.17 
  18  -1   2    1.28    0.17 
 -18   1  -2    1.56    0.17 
  18   1   2    1.76    0.19 
 -19   1  -2   -0.10    0.11 
  19  -2  -2    3.22    0.24 
  18  -2  -2    1.87    0.19 
 -18  -2   2    1.79    0.19 
  18   2  -2    2.05    0.23 
  17  -2  -2    1.65    0.17 
 -17  -2   2    1.49    0.17 
  17   2  -2    2.28    0.22 
 -16  -2   2    2.22    0.20 
  16  -2  -2    2.33    0.19 
  16   2  -2    3.21    0.22 
 -16   2   2    3.11    0.20 
 -15  -2   2    8.77    0.31 
  15  -2  -2    8.65    0.29 
 -15   2   2    6.62    0.25 
  15   2  -2    6.71    0.28 
 -14  -2   2    0.17    0.09 
  14  -2  -2    0.22    0.09 
 -14   2   2    0.30    0.09 
  14   2  -2    0.30    0.10 
 -13  -2   2   17.68    0.42 
  13  -2  -2   17.54    0.40 
 -13   2   2   19.98    0.43 
  13   2  -2   19.70    0.43 
  13   2  -2   19.61    0.45 
  12  -2  -2    4.90    0.19 
 -12  -2   2    5.22    0.21 
 -12   2   2    5.46    0.18 
  12   2  -2    5.75    0.21 
 -12   2   2    5.51    0.20 
  12   2  -2    5.68    0.22 
  11  -2  -2   13.63    0.33 
 -11  -2   2   13.02    0.32 
  11  -2  -2   13.12    0.31 
  11   2  -2   13.10    0.33 
 -11   2   2   12.38    0.30 
  11   2  -2   13.01    0.31 
 -11   2   2   13.25    0.28 
  10  -2  -2   11.14    0.27 
  10  -2  -2   10.93    0.28 
  10   2  -2    9.48    0.26 
 -10   2   2    9.22    0.25 
 -10   2   2    9.62    0.22 
  10   2  -2    9.69    0.25 
  -9  -2   2    6.78    0.21 
   9  -2  -2    7.28    0.20 
   9  -2  -2    6.89    0.20 
  -9   2   2    5.69    0.18 
   9   2  -2    5.58    0.18 
   9   2  -2    5.43    0.18 
  -9   2   2    5.80    0.15 
   8  -2  -2    2.06    0.11 
  -8  -2   2    1.94    0.08 
  -8  -2   2    1.87    0.11 
   8  -2  -2    1.93    0.11 
  -8   2   2    2.33    0.12 
  -8   2   2    2.35    0.09 
   8   2  -2    2.41    0.12 
   8   2  -2    2.36    0.12 
   7  -2  -2    8.72    0.21 
  -7  -2   2    9.12    0.17 
   7  -2  -2    9.32    0.21 
  -7  -2   2    8.75    0.22 
  -7   2   2    9.89    0.23 
   7   2  -2    9.77    0.24 
   7   2  -2   10.38    0.24 
  -7   2   2   10.08    0.19 
   6  -2  -2   48.51    0.74 
  -6  -2   2   47.94    0.74 
   6  -2  -2   47.67    0.74 
  -6  -2   2   48.52    0.69 
  -6   2   2   49.68    0.70 
  -6   2   2   47.99    0.75 
   6   2  -2   49.45    0.76 
   6   2  -2   48.44    0.76 
   5  -2  -2    4.87    0.13 
  -5  -2   2    4.75    0.14 
   5  -2  -2    4.91    0.14 
  -5  -2   2    4.84    0.11 
  -5   2   2    5.03    0.10 
   5   2  -2    4.96    0.14 
  -5   2   2    4.87    0.14 
   4  -2  -2   58.81    0.87 
  -4  -2   2   58.06    0.87 
   4  -2  -2   60.40    0.86 
  -4  -2   2   59.31    0.83 
  -4  -2   2   59.63    0.87 
  -4   2   2   58.38    0.86 
   4   2  -2   58.80    0.86 
  -4   2   2   59.80    0.81 
  -3  -2   2   10.64    0.21 
  -3  -2   2   10.82    0.19 
   3  -2  -2   11.00    0.21 
   3  -2  -2   10.69    0.21 
  -3  -2   2   10.49    0.21 
  -3   2   2   11.05    0.17 
  -3   2   2   10.73    0.21 
   3   2  -2   10.56    0.20 
  -2  -2   2   25.99    0.41 
  -2  -2   2   25.77    0.39 
  -2  -2   2   25.43    0.40 
   2  -2  -2   26.01    0.41 
  -2  -2   2   25.67    0.41 
   2  -2  -2   26.33    0.41 
  -2   2   2   33.25    0.51 
  -2   2   2   33.97    0.47 
  -1  -2   2   19.30    0.32 
  -1  -2   2   19.40    0.32 
   1  -2  -2   19.97    0.29 
  -1  -2   2   19.64    0.31 
   1  -2  -2   19.49    0.33 
  -1  -2   2   19.82    0.32 
   1  -2  -2   19.22    0.32 
  -1   2   2   27.91    0.42 
   0  -2   2   83.54    1.17 
   0  -2  -2   83.37    1.18 
   0  -2   2   84.26    1.18 
   0  -2   2   82.96    1.17 
   0  -2   2   85.01    1.16 
   0  -2  -2   84.99    1.19 
   0  -2  -2   84.36    1.15 
   0   2   2   72.46    1.01 
   1  -2   2   59.52    0.85 
   1  -2   2   58.99    0.85 
   1  -2   2   60.19    0.83 
  -1  -2  -2   58.77    0.83 
  -1  -2  -2   57.56    0.85 
   1   2   2   63.18    0.92 
   1   2   2   64.14    0.88 
  -1   2  -2   62.75    0.90 
  -2  -2  -2    8.25    0.18 
   2  -2   2    8.77    0.15 
  -2  -2  -2    8.62    0.16 
   2  -2   2    8.64    0.18 
   2  -2   2    8.48    0.18 
  -2   2  -2    7.43    0.16 
   2   2   2    6.98    0.12 
   3  -2   2   34.24    0.53 
   3  -2   2   33.94    0.53 
  -3  -2  -2   34.66    0.52 
  -3  -2  -2   34.32    0.54 
   3  -2   2   34.54    0.49 
   3   2   2   31.14    0.43 
  -3   2  -2   30.33    0.48 
   3   2   2   30.01    0.49 
  -4  -2  -2    3.71    0.12 
   4  -2   2    3.63    0.08 
   4  -2   2    3.50    0.11 
  -4  -2  -2    3.59    0.11 
   4   2   2    1.81    0.09 
  -4   2  -2    1.85    0.08 
  -4   2  -2    1.91    0.08 
   5  -2   2    0.07    0.02 
   5  -2   2    0.06    0.03 
  -5  -2  -2    0.04    0.03 
  -5  -2  -2    0.07    0.04 
   5   2   2    0.27    0.05 
  -5   2  -2    0.30    0.05 
  -5   2  -2    0.32    0.04 
   6  -2   2   11.62    0.20 
  -6  -2  -2   11.58    0.25 
  -6  -2  -2   11.34    0.24 
   6  -2   2   11.12    0.25 
   6   2   2   13.84    0.31 
  -6   2  -2   13.66    0.27 
  -6   2  -2   14.27    0.27 
  -7  -2  -2    3.49    0.13 
   7  -2   2    3.57    0.09 
  -7  -2  -2    3.44    0.13 
  -7   2  -2    3.63    0.13 
  -7   2  -2    3.69    0.13 
   7   2   2    3.51    0.15 
   8  -2   2    0.76    0.09 
   8  -2   2    0.80    0.06 
  -8  -2  -2    0.95    0.10 
  -8  -2  -2    0.84    0.09 
   8   2   2    0.78    0.09 
  -8   2  -2    0.93    0.08 
  -8   2  -2    0.84    0.09 
  -9  -2  -2    3.76    0.16 
   9  -2   2    3.81    0.16 
  -9   2  -2    4.23    0.15 
  -9   2  -2    4.00    0.15 
   9   2   2    4.22    0.16 
   9   2   2    4.18    0.18 
 -10  -2  -2    7.84    0.24 
  10  -2   2    7.97    0.23 
 -10   2  -2    7.11    0.21 
 -10   2  -2    7.26    0.21 
  10   2   2    7.18    0.22 
  10   2   2    6.80    0.23 
 -11  -2  -2    6.15    0.22 
  11  -2   2    5.92    0.21 
  11   2   2    4.84    0.19 
 -11   2  -2    4.79    0.18 
  11   2   2    4.89    0.21 
 -11   2  -2    5.34    0.18 
 -12  -2  -2   18.53    0.42 
  12  -2   2   17.99    0.41 
  12   2   2   16.89    0.42 
  12   2   2   16.74    0.39 
 -12   2  -2   16.97    0.37 
 -12   2  -2   17.05    0.37 
  13  -2   2    0.12    0.08 
 -13  -2  -2    0.09    0.09 
  13   2   2    0.14    0.09 
 -13   2  -2    0.26    0.08 
 -13   2  -2    0.13    0.07 
  13   2   2    0.22    0.08 
 -14  -2  -2    6.19    0.25 
  14  -2   2    5.95    0.24 
  14   2   2    4.72    0.22 
 -14   2  -2    4.88    0.21 
  14   2   2    4.58    0.23 
 -14   2  -2    4.58    0.21 
  15  -2   2    5.85    0.25 
 -15  -2  -2    6.37    0.27 
 -15   2  -2    6.53    0.25 
  15   2   2    6.04    0.25 
 -15   2  -2    5.60    0.24 
  15   2   2    6.15    0.27 
 -16  -2  -2    1.78    0.20 
  16  -2   2    1.39    0.16 
  16   2   2    1.73    0.20 
  16   2   2    1.87    0.20 
  17  -2   2    1.03    0.15 
 -17  -2  -2    1.11    0.16 
  17   2   2    1.51    0.17 
  18  -2   2    1.60    0.20 
  18  -3  -2    1.40    0.28 
  18   3  -2    1.82    0.20 
 -18   3   2    1.98    0.23 
 -17  -3   2    0.44    0.13 
  17  -3  -2    0.20    0.11 
  17   3  -2    0.58    0.14 
 -17   3   2    1.17    0.16 
 -16  -3   2    0.82    0.14 
  16  -3  -2    0.54    0.12 
  16   3  -2    1.75    0.21 
 -16   3   2    1.73    0.20 
  15  -3  -2    2.03    0.19 
 -15  -3   2    2.15    0.20 
  15   3  -2    2.21    0.20 
 -15   3   2    1.99    0.19 
 -14  -3   2    8.75    0.31 
  14  -3  -2    9.28    0.31 
 -14   3   2   10.17    0.32 
  14   3  -2    9.93    0.33 
 -13  -3   2    1.08    0.13 
  13  -3  -2    0.91    0.12 
  13   3  -2    1.40    0.17 
 -13   3   2    1.51    0.16 
 -12  -3   2    9.32    0.29 
  12  -3  -2    9.12    0.28 
 -12   3   2    7.67    0.26 
  12   3  -2    8.15    0.28 
  11  -3  -2    5.43    0.21 
 -11  -3   2    5.42    0.22 
  11   3  -2    4.86    0.21 
 -11   3   2    4.60    0.20 
  11   3  -2    4.88    0.20 
 -10  -3   2    5.33    0.20 
  10  -3  -2    4.94    0.25 
  10  -3  -2    5.46    0.20 
  10   3  -2    5.37    0.21 
 -10   3   2    5.32    0.20 
  10   3  -2    5.57    0.20 
   9  -3  -2    3.27    0.13 
  -9  -3   2    3.08    0.16 
   9  -3  -2    3.18    0.15 
   9   3  -2    2.44    0.15 
   9   3  -2    2.58    0.14 
  -9   3   2    2.41    0.14 
  -8  -3   2    5.52    0.19 
   8  -3  -2    5.40    0.19 
   8  -3  -2    5.15    0.16 
  -8   3   2    4.74    0.17 
   8   3  -2    4.75    0.18 
   8   3  -2    4.61    0.18 
   7  -3  -2    2.70    0.11 
   7  -3  -2    2.38    0.13 
  -7  -3   2    2.46    0.13 
   7   3  -2    2.02    0.12 
  -7   3   2    2.16    0.12 
   7   3  -2    2.23    0.13 
   6  -3  -2   12.79    0.26 
   6  -3  -2   12.11    0.28 
  -6  -3   2   12.20    0.27 
  -6  -3   2   12.52    0.22 
  -6  -3   2   12.05    0.28 
  -6   3   2   11.30    0.26 
   6   3  -2   11.66    0.26 
  -6   3   2   11.51    0.21 
   5  -3  -2    4.35    0.13 
  -5  -3   2    4.77    0.11 
  -5  -3   2    4.51    0.15 
   5  -3  -2    4.66    0.15 
   5   3  -2    5.99    0.17 
  -5   3   2    5.74    0.17 
  -5   3   2    5.90    0.12 
  -4  -3   2    3.84    0.13 
  -4  -3   2    3.94    0.10 
   4  -3  -2    4.03    0.14 
  -4  -3   2    3.85    0.14 
   4  -3  -2    3.88    0.12 
  -4   3   2    3.12    0.12 
  -4   3   2    3.23    0.08 
   4   3  -2    3.00    0.12 
   3  -3  -2   14.14    0.28 
  -3  -3   2   13.67    0.27 
  -3  -3   2   14.12    0.25 
  -3  -3   2   13.89    0.28 
   3  -3  -2   14.17    0.27 
   3   3  -2   17.68    0.33 
  -3   3   2   18.44    0.28 
  -3   3   2   17.49    0.33 
   2  -3  -2   26.14    0.43 
  -2  -3   2   26.08    0.43 
  -2  -3   2   25.16    0.43 
  -2  -3   2   25.11    0.43 
  -2  -3   2   25.43    0.41 
   2  -3  -2   26.42    0.44 
  -2   3   2   25.39    0.43 
  -2   3   2   26.33    0.39 
   1  -3  -2   51.38    0.72 
  -1  -3   2   51.18    0.75 
  -1  -3   2   50.79    0.77 
   1  -3  -2   51.04    0.77 
  -1  -3   2   50.52    0.76 
  -1  -3   2   50.76    0.76 
   1  -3  -2   50.34    0.78 
  -1   3   2   48.11    0.72 
   0  -3   2   78.69    1.13 
   0  -3  -2   80.70    1.10 
   0  -3   2   78.79    1.13 
   0  -3   2   78.35    1.12 
   0  -3  -2   76.24    1.15 
   0  -3  -2   80.10    1.14 
   0  -3   2   77.29    1.13 
   0   3   2   72.60    1.03 
  -1  -3  -2    1.75    0.07 
   1  -3   2    1.94    0.09 
   1  -3   2    2.03    0.08 
  -1  -3  -2    1.69    0.09 
   1  -3   2    1.87    0.09 
  -1   3  -2    0.65    0.06 
   1   3   2    0.56    0.05 
   1   3   2    0.67    0.07 
  -2  -3  -2    0.15    0.04 
   2  -3   2    0.20    0.03 
  -2  -3  -2    0.40    0.04 
   2  -3   2    0.15    0.04 
   2  -3   2    0.17    0.04 
   2   3   2    0.27    0.05 
  -2   3  -2    0.32    0.05 
   2   3   2    0.34    0.04 
   3  -3   2   14.87    0.26 
  -3  -3  -2   14.49    0.27 
   3  -3   2   14.38    0.29 
  -3  -3  -2   14.76    0.30 
  -3   3  -2   17.32    0.33 
  -3   3  -2   17.42    0.32 
   3   3   2   17.32    0.34 
   3   3   2   17.54    0.28 
   4  -3   2    9.35    0.22 
   4  -3   2    9.11    0.18 
  -4  -3  -2    9.01    0.22 
  -4  -3  -2    9.10    0.21 
   4   3   2    9.49    0.24 
  -4   3  -2    9.85    0.23 
   4   3   2   10.01    0.16 
  -4   3  -2    9.53    0.21 
  -5  -3  -2   12.41    0.28 
  -5  -3  -2   12.47    0.27 
   5  -3   2   12.96    0.23 
   5  -3   2   12.98    0.28 
  -5   3  -2   14.99    0.31 
  -5   3  -2   14.97    0.29 
   5   3   2   14.63    0.32 
  -6  -3  -2   14.20    0.30 
   6  -3   2   14.18    0.31 
   6  -3   2   14.57    0.25 
  -6  -3  -2   14.65    0.31 
  -6   3  -2   15.81    0.33 
   6   3   2   15.39    0.35 
  -6   3  -2   16.09    0.30 
   7  -3   2   13.05    0.30 
  -7  -3  -2   13.41    0.30 
  -7  -3  -2   13.26    0.30 
  -7   3  -2   12.68    0.27 
  -7   3  -2   12.94    0.30 
   7   3   2   12.50    0.32 
   8  -3   2    1.95    0.13 
  -8  -3  -2    2.17    0.14 
  -8  -3  -2    2.02    0.13 
  -8   3  -2    2.49    0.14 
   8   3   2    2.58    0.16 
  -8   3  -2    2.55    0.12 
   9  -3   2    2.43    0.14 
  -9  -3  -2    2.04    0.14 
  -9  -3  -2    2.35    0.14 
   9   3   2    2.08    0.15 
  -9   3  -2    2.02    0.12 
  -9   3  -2    1.88    0.14 
 -10  -3  -2    2.81    0.16 
  10  -3   2    2.54    0.15 
 -10   3  -2    4.56    0.17 
 -10   3  -2    4.31    0.19 
  10   3   2    4.25    0.21 
  10   3   2    4.12    0.19 
 -11  -3  -2   10.52    0.31 
  11  -3   2   11.16    0.31 
  11   3   2   12.01    0.35 
  11   3   2   12.09    0.33 
 -11   3  -2   11.96    0.31 
  12  -3   2    3.60    0.20 
 -12  -3  -2    3.63    0.20 
  12   3   2    3.72    0.21 
 -12   3  -2    3.98    0.20 
  12   3   2    3.79    0.20 
  13  -3   2    8.36    0.29 
 -13  -3  -2    8.20    0.29 
 -13   3  -2    8.07    0.27 
  13   3   2    7.63    0.28 
  13   3   2    7.73    0.29 
 -14  -3  -2    0.16    0.10 
  14  -3   2    0.06    0.09 
 -14   3  -2    0.18    0.10 
  14   3   2    0.02    0.09 
  14   3   2    0.09    0.10 
 -15  -3  -2    5.85    0.28 
  15  -3   2    5.86    0.28 
  15   3   2    5.64    0.27 
  15   3   2    5.08    0.26 
 -15   3  -2    5.42    0.26 
 -16  -3  -2    1.47    0.17 
  16  -3   2    1.85    0.20 
 -16   3  -2    1.19    0.16 
  16   3   2    1.14    0.16 
  17  -3   2    1.90    0.22 
  17   3   2    2.03    0.22 
  16  -4  -2    0.39    0.13 
 -16   4   2    0.50    0.14 
  16   4  -2    0.32    0.14 
  15  -4  -2    0.78    0.14 
 -15  -4   2    0.69    0.15 
  15   4  -2    0.57    0.14 
 -15   4   2    0.32    0.12 
  14  -4  -2    1.99    0.19 
 -14  -4   2    2.04    0.21 
  14   4  -2    1.92    0.21 
 -14   4   2    1.56    0.17 
 -13  -4   2    7.03    0.28 
  13  -4  -2    6.89    0.28 
  13   4  -2    7.36    0.29 
 -13   4   2    7.21    0.29 
 -12  -4   2    3.69    0.22 
  12  -4  -2    3.84    0.21 
  12   4  -2    4.11    0.23 
 -12   4   2    3.91    0.22 
 -11  -4   2    4.71    0.22 
  11  -4  -2    4.46    0.22 
 -11   4   2    4.38    0.21 
  11   4  -2    4.33    0.23 
 -10  -4   2    3.09    0.18 
  10  -4  -2    3.02    0.18 
  10   4  -2    3.51    0.24 
  10   4  -2    4.12    0.21 
 -10   4   2    3.40    0.19 
   9  -4  -2    9.56    0.28 
  -9  -4   2    9.46    0.28 
   9   4  -2    9.02    0.28 
   9   4  -2    9.31    0.28 
  -9   4   2    9.50    0.28 
  -8  -4   2    3.62    0.17 
   8  -4  -2    3.60    0.14 
   8  -4  -2    3.70    0.18 
   8   4  -2    3.37    0.17 
   8   4  -2    3.40    0.17 
  -8   4   2    3.86    0.18 
   7  -4  -2   19.14    0.41 
  -7  -4   2   19.38    0.41 
   7  -4  -2   18.80    0.37 
  -7  -4   2   18.89    0.41 
  -7   4   2   18.31    0.39 
   7   4  -2   17.67    0.39 
   6  -4  -2    2.05    0.11 
  -6  -4   2    1.75    0.13 
  -6  -4   2    1.75    0.12 
   6  -4  -2    1.66    0.13 
  -6   4   2    2.41    0.14 
   6   4  -2    2.22    0.13 
   5  -4  -2   15.36    0.34 
  -5  -4   2   14.46    0.32 
   5  -4  -2   15.03    0.30 
  -5  -4   2   13.79    0.30 
  -5  -4   2   14.31    0.32 
  -5   4   2   12.62    0.29 
   5   4  -2   11.97    0.29 
  -4  -4   2    8.25    0.22 
   4  -4  -2    8.02    0.23 
  -4  -4   2    7.71    0.22 
  -4  -4   2    8.30    0.18 
   4  -4  -2    8.12    0.21 
   4   4  -2    7.30    0.21 
  -4   4   2    7.75    0.21 
   3  -4  -2    7.52    0.20 
  -3  -4   2    7.79    0.18 
  -3  -4   2    7.75    0.20 
   3  -4  -2    7.07    0.21 
  -3  -4   2    7.78    0.21 
  -3   4   2    9.83    0.23 
   3   4  -2    9.60    0.24 
   2  -4  -2    3.65    0.14 
  -2  -4   2    3.69    0.13 
  -2  -4   2    3.83    0.13 
   2  -4  -2    3.48    0.15 
  -2  -4   2    3.80    0.14 
  -2  -4   2    3.76    0.14 
  -2   4   2    3.18    0.13 
  -1  -4   2    6.87    0.18 
  -1  -4   2    7.05    0.20 
   1  -4  -2    6.80    0.19 
   1  -4  -2    7.07    0.21 
  -1  -4   2    6.94    0.19 
  -1  -4   2    7.09    0.18 
   1  -4  -2    7.29    0.16 
  -1   4   2    7.43    0.19 
   0  -4   2    2.34    0.12 
   0  -4   2    2.51    0.11 
   0  -4   2    2.44    0.11 
   0  -4  -2    2.45    0.09 
   0  -4  -2    2.48    0.13 
   0  -4  -2    2.67    0.12 
   0   4   2    1.32    0.08 
   0   4  -2    1.30    0.09 
  -1  -4  -2    3.45    0.14 
   1  -4   2    3.69    0.15 
   1  -4   2    3.63    0.13 
  -1  -4  -2    3.70    0.12 
  -1   4  -2    3.00    0.12 
   1   4   2    2.87    0.14 
  -1   4  -2    2.83    0.12 
   1   4   2    2.86    0.10 
   2  -4   2    6.01    0.16 
  -2  -4  -2    5.94    0.16 
  -2  -4  -2    5.62    0.19 
   2  -4   2    6.10    0.19 
   2   4   2    8.09    0.18 
  -2   4  -2    8.23    0.21 
   2   4   2    7.82    0.22 
  -2   4  -2    7.73    0.20 
  -3  -4  -2    9.02    0.24 
   3  -4   2    8.90    0.24 
  -3  -4  -2    8.94    0.21 
   3  -4   2    9.31    0.20 
   3   4   2    8.20    0.20 
   3   4   2    8.78    0.24 
  -3   4  -2    8.91    0.23 
  -3   4  -2    8.81    0.21 
  -4  -4  -2    6.94    0.21 
   4  -4   2    7.23    0.22 
   4  -4   2    7.58    0.18 
  -4  -4  -2    7.08    0.19 
   4   4   2    7.67    0.23 
  -4   4  -2    7.49    0.20 
  -4   4  -2    7.50    0.21 
  -5  -4  -2    0.54    0.07 
   5  -4   2    0.51    0.06 
  -5  -4  -2    0.56    0.08 
   5  -4   2    0.55    0.08 
  -5   4  -2    1.19    0.09 
  -5   4  -2    1.06    0.11 
   5   4   2    1.15    0.12 
   6  -4   2   10.18    0.28 
  -6  -4  -2   10.55    0.28 
  -6  -4  -2   10.91    0.27 
   6   4   2   11.65    0.31 
  -6   4  -2   11.58    0.29 
  -7  -4  -2    6.11    0.22 
  -7  -4  -2    5.81    0.20 
   7  -4   2    6.04    0.22 
   7   4   2    5.95    0.23 
  -7   4  -2    5.35    0.20 
  -8  -4  -2    5.09    0.21 
   8  -4   2    5.22    0.21 
  -8  -4  -2    5.11    0.20 
   8   4   2    5.17    0.23 
  -8   4  -2    5.26    0.21 
  -9  -4  -2    5.05    0.21 
  -9  -4  -2    5.34    0.22 
   9  -4   2    5.01    0.21 
   9   4   2    5.54    0.24 
  -9   4  -2    5.65    0.22 
 -10  -4  -2    1.96    0.16 
  10  -4   2    1.97    0.16 
 -10  -4  -2    1.94    0.17 
  10   4   2    0.96    0.13 
 -10   4  -2    1.05    0.13 
  11  -4   2    1.70    0.16 
 -11  -4  -2    1.66    0.16 
 -11   4  -2    0.83    0.13 
  11   4   2    1.02    0.13 
  11   4   2    0.68    0.13 
 -12  -4  -2    4.27    0.23 
  12  -4   2    4.62    0.24 
  12   4   2    4.68    0.24 
  12   4   2    4.70    0.25 
 -12   4  -2    4.74    0.24 
 -13  -4  -2    0.35    0.11 
  13  -4   2    0.45    0.12 
  13   4   2    0.62    0.13 
 -13   4  -2    0.54    0.13 
  13   4   2    0.68    0.13 
  14  -4   2    2.04    0.21 
 -14  -4  -2    2.20    0.21 
  14   4   2    2.06    0.24 
  14   4   2    2.18    0.22 
 -14   4  -2    2.04    0.19 
 -15  -4  -2    1.21    0.17 
  15  -4   2    1.28    0.17 
  15   4   2    1.74    0.19 
 -15   4  -2    1.74    0.20 
  16   4   2    0.62    0.15 
 -16   4  -2    0.75    0.15 
 -14  -5   2    1.23    0.17 
  14  -5  -2    1.32    0.18 
  14   5  -2    1.51    0.18 
 -14   5   2    1.62    0.19 
  13  -5  -2    1.08    0.16 
 -13  -5   2    1.05    0.16 
  13   5  -2    1.40    0.18 
 -13   5   2    1.20    0.16 
 -12  -5   2    0.60    0.13 
  12  -5  -2    0.72    0.14 
 -12   5   2    0.38    0.12 
  12   5  -2    0.37    0.13 
 -11  -5   2    2.47    0.20 
  11  -5  -2    2.03    0.19 
  11   5  -2    2.71    0.22 
 -11   5   2    2.79    0.21 
  10  -5  -2    5.87    0.26 
 -10  -5   2    5.87    0.25 
  10   5  -2    7.02    0.29 
 -10   5   2    6.51    0.27 
   9  -5  -2    3.59    0.20 
  -9  -5   2    3.46    0.20 
   9   5  -2    3.10    0.21 
  -9   5   2    3.17    0.20 
   8  -5  -2   11.12    0.33 
  -8  -5   2   10.21    0.31 
   8   5  -2    9.75    0.31 
   8   5  -2   10.53    0.32 
  -8   5   2   11.42    0.32 
  -7  -5   2    0.29    0.09 
  -7  -5   2    0.37    0.09 
   7  -5  -2    0.22    0.09 
   7   5  -2   -0.05    0.07 
  -7   5   2    0.05    0.08 
  -6  -5   2   11.44    0.32 
  -6  -5   2   12.00    0.31 
   6  -5  -2   11.89    0.33 
   6  -5  -2   12.24    0.29 
   6   5  -2   13.72    0.35 
  -6   5   2   13.24    0.34 
   5  -5  -2    0.87    0.09 
  -5  -5   2    0.89    0.10 
  -5  -5   2    0.83    0.10 
   5  -5  -2    0.79    0.11 
  -5   5   2    0.94    0.11 
   5   5  -2    1.04    0.11 
  -4  -5   2    5.45    0.20 
   4  -5  -2    6.06    0.20 
   4  -5  -2    5.85    0.22 
  -4  -5   2    5.94    0.21 
   4   5  -2    7.15    0.24 
  -4   5   2    7.82    0.24 
  -3  -5   2    0.95    0.11 
  -3  -5   2    0.93    0.10 
   3  -5  -2    0.92    0.11 
   3  -5  -2    0.89    0.11 
   3   5  -2    1.02    0.11 
  -3   5   2    0.76    0.09 
   2  -5  -2    0.29    0.08 
  -2  -5   2    0.35    0.07 
  -2  -5   2    0.42    0.08 
   2  -5  -2    0.50    0.08 
   2   5  -2    0.37    0.07 
  -2   5   2    0.39    0.07 
   2   5  -2    0.40    0.08 
  -1  -5   2    3.48    0.16 
  -1  -5   2    3.56    0.15 
   1  -5  -2    3.20    0.16 
  -1  -5   2    3.70    0.15 
   1  -5  -2    3.17    0.17 
  -1   5   2    3.05    0.14 
   1   5  -2    2.98    0.14 
   0  -5  -2    3.51    0.17 
   0  -5  -2    3.18    0.16 
   0  -5   2    3.62    0.17 
   0  -5   2    3.73    0.15 
   0  -5   2    3.52    0.15 
   0   5  -2    3.93    0.15 
   0   5   2    3.72    0.15 
  -1  -5  -2    0.44    0.08 
   1  -5   2    0.43    0.08 
   1  -5   2    0.49    0.07 
   1   5   2    0.56    0.07 
  -1   5  -2    0.61    0.08 
   1   5   2    0.69    0.10 
  -2  -5  -2    0.14    0.07 
   2  -5   2    0.32    0.08 
   2  -5   2    0.27    0.06 
  -2   5  -2    0.84    0.09 
   2   5   2    0.70    0.10 
  -3  -5  -2   15.70    0.32 
   3  -5   2   15.47    0.36 
  -3  -5  -2   15.03    0.36 
   3  -5   2   15.22    0.32 
  -3   5  -2   15.60    0.35 
   3   5   2   15.45    0.37 
   4  -5   2   13.55    0.34 
  -4  -5  -2   13.40    0.34 
  -4  -5  -2   14.24    0.32 
  -4   5  -2   13.71    0.33 
   4   5   2   13.21    0.35 
  -5  -5  -2    8.87    0.28 
  -5  -5  -2    9.50    0.26 
   5  -5   2    9.58    0.29 
  -5   5  -2   11.70    0.31 
   5   5   2   12.23    0.34 
   6  -5   2    7.33    0.26 
  -6  -5  -2    7.02    0.25 
  -6  -5  -2    7.08    0.23 
  -6   5  -2    8.33    0.27 
   6   5   2    7.73    0.28 
  -7  -5  -2   14.70    0.36 
   7  -5   2   14.91    0.38 
  -7  -5  -2   14.63    0.37 
  -7   5  -2   12.30    0.34 
   7   5   2   12.66    0.36 
   8  -5   2    9.65    0.32 
  -8  -5  -2   10.31    0.32 
  -8  -5  -2   10.79    0.30 
  -8   5  -2    9.10    0.30 
   8   5   2    9.08    0.32 
  -9  -5  -2    2.67    0.19 
   9  -5   2    2.86    0.20 
  -9  -5  -2    2.40    0.17 
  -9   5  -2    2.57    0.20 
   9   5   2    2.68    0.21 
 -10  -5  -2    1.20    0.14 
  10  -5   2    1.38    0.16 
 -10  -5  -2    1.31    0.15 
 -10   5  -2    1.77    0.19 
  10   5   2    2.05    0.19 
 -11  -5  -2    1.86    0.18 
  11  -5   2    1.95    0.19 
  11   5   2    2.31    0.21 
 -11   5  -2    2.51    0.21 
  11   5   2    2.59    0.22 
 -12  -5  -2    2.23    0.20 
  12  -5   2    2.48    0.21 
  12   5   2    2.40    0.22 
 -12   5  -2    2.38    0.21 
  12   5   2    2.13    0.22 
 -13  -5  -2    1.20    0.16 
  13  -5   2    1.49    0.18 
 -13   5  -2    1.00    0.16 
  13   5   2    1.22    0.17 
 -14  -5  -2   -0.04    0.11 
  14   5   2    0.37    0.21 
 -12  -6   2    1.15    0.17 
 -11  -6   2    2.69    0.23 
  11  -6  -2    2.85    0.24 
  11   6  -2    3.05    0.26 
 -11   6   2    2.88    0.25 
 -10  -6   2    4.42    0.25 
  10  -6  -2    4.52    0.26 
 -10   6   2    4.15    0.25 
  10   6  -2    3.89    0.25 
  -9  -6   2    5.38    0.25 
   9  -6  -2    5.26    0.26 
  -9   6   2    4.96    0.25 
   9   6  -2    4.71    0.26 
  -8  -6   2    1.47    0.15 
   8  -6  -2    1.38    0.16 
  -8   6   2    0.90    0.14 
   8   6  -2    0.83    0.14 
   7  -6  -2    6.38    0.28 
  -7  -6   2    6.34    0.25 
  -7  -6   2    6.26    0.27 
  -7   6   2    6.50    0.27 
  -6  -6   2    1.13    0.14 
  -6  -6   2    1.06    0.13 
   6  -6  -2    0.83    0.13 
   6   6  -2    1.32    0.15 
  -6   6   2    1.12    0.13 
  -5  -6   2    4.07    0.21 
  -5  -6   2    4.45    0.21 
   5  -6  -2    4.00    0.22 
   5   6  -2    3.34    0.20 
  -5   6   2    3.20    0.20 
   4  -6  -2    1.29    0.15 
   4  -6  -2    1.30    0.14 
  -4  -6   2    1.63    0.20 
  -4  -6   2    1.29    0.15 
  -4   6   2    1.33    0.13 
   4   6  -2    1.41    0.16 
   3  -6  -2    1.86    0.15 
   3  -6  -2    1.61    0.17 
  -3  -6   2    1.61    0.15 
  -3   6   2    1.46    0.14 
   3   6  -2    1.74    0.16 
   2  -6  -2    0.14    0.08 
   2  -6  -2    0.08    0.09 
  -2  -6   2    0.11    0.08 
   2   6  -2   -0.01    0.08 
  -2   6   2    0.04    0.07 
   1  -6  -2    0.80    0.12 
   1  -6  -2    0.78    0.11 
  -1  -6   2    0.95    0.11 
   1   6  -2    0.71    0.11 
  -1   6   2    0.60    0.09 
   0  -6   2    0.58    0.09 
   0  -6  -2    0.68    0.11 
   0  -6   2    0.67    0.11 
   0   6   2    0.38    0.10 
   0   6  -2    0.31    0.08 
  -1  -6  -2   -0.06    0.07 
   1  -6   2   -0.10    0.07 
   1  -6   2   -0.02    0.06 
  -1   6  -2    0.07    0.07 
   1   6   2    0.07    0.08 
   2  -6   2    6.35    0.25 
  -2  -6  -2    6.64    0.25 
   2   6   2    7.19    0.28 
  -2   6  -2    8.09    0.26 
   3  -6   2    1.88    0.16 
  -3  -6  -2    1.64    0.16 
  -3   6  -2    1.97    0.17 
   3   6   2    2.27    0.18 
   4  -6   2   10.29    0.32 
  -4  -6  -2   10.80    0.33 
   4   6   2   12.27    0.37 
  -4   6  -2   11.94    0.34 
   5  -6   2    2.26    0.18 
  -5  -6  -2    2.75    0.20 
  -5   6  -2    2.04    0.18 
   5   6   2    1.62    0.18 
   6  -6   2    2.67    0.20 
  -6  -6  -2    2.39    0.20 
   6   6   2    1.10    0.15 
  -6   6  -2    1.47    0.17 
   7  -6   2    6.43    0.28 
  -7  -6  -2    6.31    0.28 
   7   6   2    7.04    0.30 
  -7   6  -2    7.02    0.29 
  -8  -6  -2    8.87    0.33 
   8  -6   2    9.26    0.34 
   8   6   2    9.77    0.36 
  -8   6  -2   10.10    0.34 
   9  -6   2    0.13    0.11 
  -9  -6  -2    0.08    0.11 
  -9  -6  -2    0.03    0.10 
  -9   6  -2    0.54    0.13 
   9   6   2    0.56    0.14 
 -10  -6  -2    1.32    0.16 
 -10  -6  -2    0.99    0.16 
  10  -6   2    0.83    0.15 
 -10   6  -2    0.90    0.16 
  10   6   2    0.74    0.15 
 -11  -6  -2    2.83    0.23 
  11  -6   2    2.87    0.29 
  11   6   2    2.33    0.26 
 -11   6  -2    2.33    0.26 
 -12  -6  -2    0.24    0.12 
   8   7  -2    5.73    0.38 
  -8   7   2    5.05    0.31 
   7  -7  -2    0.34    0.13 
  -7   7   2    0.19    0.12 
   7   7  -2    0.02    0.12 
   6  -7  -2    4.50    0.27 
  -6  -7   2    4.46    0.26 
  -6   7   2    5.60    0.27 
   5  -7  -2    0.10    0.11 
  -5  -7   2    0.17    0.11 
  -5   7   2    0.00    0.09 
   4  -7  -2    2.60    0.23 
  -4  -7   2    3.06    0.21 
  -4   7   2    3.89    0.22 
   3  -7  -2    0.34    0.12 
  -3  -7   2    0.50    0.12 
   3   7  -2    0.32    0.11 
   2  -7  -2    1.37    0.15 
   2  -7  -2    1.34    0.16 
  -2  -7   2    1.13    0.14 
   2   7  -2    1.60    0.19 
  -1  -7   2    0.05    0.09 
   1  -7  -2    0.21    0.10 
   1   7  -2    0.16    0.10 
  -1   7   2    0.15    0.10 
   0  -7  -2    1.23    0.15 
   0   7   2    1.14    0.15 
   0   7  -2    1.17    0.15 
   1  -7   2    0.84    0.14 
  -1  -7  -2    0.90    0.13 
   1   7   2    1.13    0.16 
   2  -7   2    1.36    0.16 
  -2  -7  -2    1.40    0.16 
   2   7   2    1.16    0.16 
  -2   7  -2    1.46    0.15 
  -3  -7  -2    2.20    0.20 
   3  -7   2    1.75    0.18 
  -3   7  -2    1.95    0.19 
   3   7   2    1.36    0.18 
   4  -7   2    0.86    0.14 
  -4  -7  -2    0.79    0.14 
  -4   7  -2    0.57    0.13 
   4   7   2    0.57    0.13 
  -5  -7  -2    3.84    0.25 
   5  -7   2    4.17    0.26 
   5   7   2    4.23    0.27 
  -5   7  -2    4.16    0.25 
  -6  -7  -2    2.67    0.22 
   6  -7   2    2.98    0.23 
  -6   7  -2    3.70    0.25 
   6   7   2    4.13    0.27 
   7  -7   2    3.68    0.25 
  -7  -7  -2    2.89    0.27 
   7   7   2    3.43    0.27 
  -7   7  -2    3.83    0.26 
   8   7   2    1.52    0.20 
 -19   0   3    1.60    0.18 
 -18   0   3    0.72    0.14 
 -17   0   3    3.64    0.22 
  16   0  -3    0.64    0.12 
 -16   0   3    0.52    0.11 
  15   0  -3    1.64    0.16 
  15   0  -3    2.00    0.15 
 -15   0   3    1.85    0.17 
  14   0  -3    0.95    0.12 
 -14   0   3    1.04    0.12 
  14   0  -3    1.01    0.11 
 -13   0   3    1.81    0.14 
 -13   0   3    1.75    0.12 
  13   0  -3    2.02    0.15 
  13   0  -3    1.70    0.13 
 -12   0   3    3.08    0.15 
 -12   0   3    2.96    0.13 
  12   0  -3    3.27    0.14 
  12   0  -3    3.34    0.16 
  11   0  -3    5.51    0.19 
 -11   0   3    5.03    0.17 
  11   0  -3    5.34    0.17 
 -11   0   3    5.02    0.16 
  10   0  -3   12.04    0.28 
 -10   0   3   12.14    0.26 
 -10   0   3   11.87    0.27 
  10   0  -3   11.94    0.26 
  -9   0   3   11.12    0.24 
  -9   0   3   10.81    0.23 
   9   0  -3   11.17    0.26 
   9   0  -3   11.46    0.24 
  -8   0   3  107.95    1.51 
   8   0  -3  104.44    1.53 
   8   0  -3  108.28    1.50 
  -8   0   3  106.56    1.51 
  -7   0   3   17.25    0.31 
  -7   0   3   17.83    0.31 
   7   0  -3   17.93    0.33 
   7   0  -3   17.90    0.30 
   6   0  -3    8.49    0.17 
  -6   0   3    8.61    0.18 
   6   0  -3    8.59    0.19 
  -6   0   3    8.63    0.18 
  -5   0   3    0.23    0.03 
   5   0  -3    0.22    0.03 
   5   0  -3    0.23    0.03 
  -5   0   3    0.19    0.03 
  -4   0   3  129.75    1.78 
   4   0  -3  131.62    1.76 
  -4   0   3  130.94    1.77 
   4   0  -3  129.92    1.80 
   3   0  -3   17.65    0.25 
  -3   0   3   17.19    0.27 
   3   0  -3   17.40    0.28 
  -3   0   3   17.36    0.28 
  -2   0   3    6.13    0.11 
   2   0  -3    6.09    0.09 
   2   0  -3    6.03    0.12 
  -1   0   3    0.00    0.01 
  -1   0   3    0.01    0.01 
   1   0  -3    0.02    0.01 
  -1   0   3    0.02    0.01 
   0   0  -3    0.93    0.04 
   0   0  -3    1.07    0.04 
   0   0   3    0.97    0.04 
  -1   0  -3    4.08    0.09 
   1   0   3    4.10    0.08 
  -1   0  -3    4.04    0.07 
   1   0   3    4.00    0.09 
  -2   0  -3    0.39    0.03 
  -2   0  -3    0.44    0.02 
   2   0   3    0.45    0.03 
  -3   0  -3   36.37    0.51 
  -3   0  -3   35.50    0.53 
   3   0   3   35.75    0.55 
   3   0   3   36.43    0.51 
  -4   0  -3   24.30    0.39 
   4   0   3   24.77    0.37 
   4   0   3   25.06    0.41 
  -4   0  -3   25.00    0.36 
   5   0   3   11.45    0.20 
  -5   0  -3   11.76    0.20 
  -5   0  -3   11.40    0.22 
   5   0   3   11.36    0.24 
   6   0   3   16.28    0.32 
   6   0   3   16.22    0.27 
  -6   0  -3   15.73    0.30 
  -6   0  -3   16.10    0.26 
   7   0   3   14.24    0.25 
   7   0   3   14.39    0.30 
  -7   0  -3   13.76    0.28 
  -7   0  -3   14.36    0.25 
  -8   0  -3   32.24    0.55 
  -8   0  -3   32.79    0.50 
   8   0   3   32.80    0.51 
   8   0   3   32.53    0.57 
  -9   0  -3    9.17    0.19 
   9   0   3    9.11    0.25 
   9   0   3    9.04    0.20 
  -9   0  -3    9.07    0.23 
 -10   0  -3   64.65    1.01 
  10   0   3   65.81    0.97 
 -10   0  -3   65.40    0.95 
  10   0   3   63.10    1.02 
 -11   0  -3    0.44    0.08 
  11   0   3    0.71    0.08 
  11   0   3    0.51    0.08 
 -11   0  -3    0.59    0.06 
  12   0   3   10.77    0.30 
 -12   0  -3   10.64    0.29 
 -13   0  -3    0.27    0.09 
  13   0   3    0.18    0.08 
 -14   0  -3    0.45    0.10 
  14   0   3    0.56    0.11 
 -15   0  -3    0.65    0.12 
  15   0   3    0.68    0.12 
 -16   0  -3    0.64    0.13 
  16   0   3    0.64    0.13 
 -17   0  -3    3.72    0.24 
  17   0   3    4.14    0.25 
 -18   0  -3    0.77    0.15 
  18   0   3    0.91    0.15 
 -19  -1   3    0.67    0.15 
 -18  -1   3    6.44    0.30 
  17  -1  -3    1.59    0.17 
 -17  -1   3    1.53    0.16 
  17   1  -3    2.08    0.21 
  16  -1  -3    1.01    0.13 
 -16  -1   3    0.80    0.13 
 -16   1   3    1.51    0.16 
  16   1  -3    1.26    0.15 
  15  -1  -3    1.45    0.14 
 -15  -1   3    1.38    0.16 
  15   1  -3    1.62    0.16 
 -15   1   3    1.82    0.15 
 -15   1   3    1.51    0.15 
  14  -1  -3    0.71    0.11 
 -14  -1   3    0.58    0.11 
  14  -1  -3    0.53    0.09 
  14   1  -3    0.58    0.09 
 -14   1   3    0.65    0.10 
 -14   1   3    0.47    0.09 
  14   1  -3    0.60    0.11 
  13  -1  -3    0.90    0.10 
  13  -1  -3    1.07    0.13 
 -13  -1   3    0.74    0.10 
  13   1  -3    0.57    0.10 
 -13   1   3    0.50    0.08 
  13   1  -3    0.56    0.08 
 -13   1   3    0.50    0.08 
 -12  -1   3   18.88    0.40 
  12  -1  -3   19.24    0.39 
  12  -1  -3   18.81    0.41 
  12   1  -3   18.04    0.37 
 -12   1   3   17.96    0.36 
  12   1  -3   17.54    0.39 
 -12   1   3   17.76    0.37 
 -11  -1   3   18.24    0.38 
  11  -1  -3   18.05    0.39 
 -11  -1   3   18.34    0.34 
  11  -1  -3   17.19    0.35 
  11   1  -3   19.21    0.40 
 -11   1   3   18.37    0.36 
 -11   1   3   18.29    0.37 
  11   1  -3   19.19    0.37 
  10  -1  -3    5.20    0.18 
 -10  -1   3    5.23    0.15 
 -10  -1   3    5.19    0.18 
  10  -1  -3    5.06    0.16 
  10   1  -3    4.51    0.15 
 -10   1   3    4.51    0.16 
 -10   1   3    4.45    0.14 
  10   1  -3    4.59    0.17 
  -9  -1   3   31.75    0.54 
   9  -1  -3   31.47    0.52 
  -9  -1   3   31.51    0.51 
   9  -1  -3   32.06    0.55 
   9   1  -3   24.97    0.46 
  -9   1   3   24.98    0.42 
  -9   1   3   25.10    0.44 
   9   1  -3   25.40    0.43 
  -8  -1   3    3.66    0.13 
   8  -1  -3    3.42    0.13 
  -8  -1   3    3.75    0.11 
   8  -1  -3    3.64    0.12 
  -8   1   3    2.95    0.11 
   8   1  -3    3.40    0.12 
   8   1  -3    3.54    0.13 
  -8   1   3    3.54    0.12 
   7  -1  -3   39.25    0.60 
  -7  -1   3   40.30    0.60 
   7  -1  -3   38.26    0.63 
  -7  -1   3   39.33    0.62 
   7   1  -3   46.27    0.69 
  -7   1   3   45.81    0.68 
   7   1  -3   45.82    0.72 
  -7   1   3   46.25    0.70 
   6  -1  -3    5.63    0.14 
   6  -1  -3    5.63    0.16 
  -6  -1   3    5.70    0.14 
  -6  -1   3    5.37    0.14 
  -6   1   3    6.18    0.15 
   6   1  -3    6.48    0.16 
   6   1  -3    6.69    0.15 
  -6   1   3    6.52    0.14 
   5  -1  -3   50.41    0.77 
   5  -1  -3   50.86    0.74 
  -5  -1   3   51.57    0.75 
  -5   1   3   53.91    0.75 
  -5   1   3   53.17    0.78 
   5   1  -3   52.44    0.79 
   5   1  -3   53.30    0.76 
   4  -1  -3   40.26    0.59 
  -4  -1   3   40.56    0.60 
   4  -1  -3   40.49    0.62 
  -4  -1   3   41.71    0.61 
  -4   1   3   38.87    0.59 
   4   1  -3   38.73    0.59 
   4   1  -3   39.82    0.57 
  -4   1   3   39.81    0.55 
  -3  -1   3   39.80    0.59 
  -3  -1   3   40.00    0.58 
   3  -1  -3   38.92    0.60 
   3  -1  -3   39.63    0.57 
   3   1  -3   35.12    0.54 
   3   1  -3   37.66    0.52 
  -3   1   3   36.56    0.50 
  -3   1   3   36.37    0.54 
  -2  -1   3   13.14    0.22 
   2  -1  -3   13.31    0.22 
   2  -1  -3   13.29    0.23 
  -2  -1   3   13.22    0.22 
   2   1  -3   10.79    0.19 
   2   1  -3   11.00    0.17 
   1  -1  -3    5.32    0.11 
  -1  -1   3    5.38    0.11 
  -1  -1   3    5.55    0.09 
   1  -1  -3    5.28    0.12 
  -1   1   3    5.34    0.11 
   1   1  -3    5.45    0.11 
   0  -1  -3    2.15    0.05 
   0  -1  -3    2.07    0.06 
   0  -1   3    2.04    0.05 
   0  -1   3    2.03    0.06 
   0   1  -3    2.03    0.05 
   0   1   3    2.14    0.06 
   0   1   3    1.99    0.06 
  -1  -1  -3    4.10    0.10 
   1  -1   3    4.05    0.09 
   1  -1   3    3.81    0.09 
  -1  -1  -3    4.09    0.09 
   1   1   3    4.33    0.11 
  -1   1  -3    4.43    0.08 
  -1   1  -3    4.45    0.11 
   1   1   3    4.47    0.09 
  -2  -1  -3   29.69    0.43 
   2  -1   3   29.16    0.44 
   2  -1   3   29.18    0.44 
  -2  -1  -3   28.72    0.44 
   2   1   3   31.90    0.45 
   2   1   3   31.54    0.49 
  -2   1  -3   32.08    0.48 
   3  -1   3    3.52    0.09 
  -3  -1  -3    3.66    0.10 
   3  -1   3    3.56    0.10 
  -3  -1  -3    3.62    0.09 
  -3   1  -3    2.89    0.09 
   4  -1   3   27.64    0.43 
   4  -1   3   27.24    0.44 
  -4  -1  -3   27.51    0.43 
  -4  -1  -3   27.73    0.43 
   4   1   3   26.18    0.45 
  -4   1  -3   26.09    0.42 
   5  -1   3   16.35    0.30 
   5  -1   3   17.08    0.26 
  -5  -1  -3   16.58    0.29 
   5  -1   3   16.54    0.29 
  -5  -1  -3   16.45    0.30 
   5   1   3   14.02    0.29 
  -5   1  -3   14.02    0.26 
  -6  -1  -3   42.59    0.67 
   6  -1   3   42.23    0.68 
  -6  -1  -3   43.68    0.65 
  -6  -1  -3   44.28    0.60 
   6  -1   3   43.79    0.62 
  -6   1  -3   45.92    0.68 
   6   1   3   45.29    0.73 
  -6   1  -3   44.56    0.69 
  -7  -1  -3   18.50    0.35 
   7  -1   3   18.81    0.31 
  -7  -1  -3   19.41    0.28 
   7  -1   3   18.35    0.36 
  -7  -1  -3   18.29    0.33 
  -7   1  -3   17.84    0.32 
   7   1   3   18.63    0.37 
  -7   1  -3   17.88    0.34 
  -8  -1  -3    9.73    0.24 
   8  -1   3    9.81    0.20 
   8  -1   3    9.65    0.24 
  -8  -1  -3   10.12    0.17 
   8   1   3    8.87    0.24 
  -8   1  -3    8.45    0.21 
  -8   1  -3    9.07    0.20 
   8   1   3    8.62    0.20 
   9  -1   3   27.91    0.45 
  -9  -1  -3   27.32    0.50 
   9  -1   3   27.07    0.50 
   9   1   3   27.21    0.52 
   9   1   3   27.43    0.47 
  -9   1  -3   26.85    0.48 
  -9   1  -3   27.27    0.46 
 -10  -1  -3    0.63    0.08 
  10  -1   3    0.46    0.08 
  10   1   3    0.35    0.06 
 -10   1  -3    0.35    0.07 
 -10   1  -3    0.43    0.06 
  10   1   3    0.28    0.07 
  11  -1   3    6.11    0.21 
 -11  -1  -3    6.15    0.21 
  11   1   3    7.65    0.21 
 -11   1  -3    7.18    0.22 
 -11   1  -3    6.87    0.20 
  11   1   3    7.24    0.25 
 -12  -1  -3    1.86    0.15 
  12  -1   3    1.52    0.14 
  12   1   3    1.43    0.14 
 -12   1  -3    1.30    0.13 
 -12   1  -3    1.24    0.11 
  12   1   3    1.41    0.12 
 -13  -1  -3    0.40    0.10 
  13  -1   3    0.45    0.10 
 -13   1  -3    0.56    0.10 
  13   1   3    0.49    0.11 
  13   1   3    0.52    0.09 
 -13   1  -3    0.76    0.09 
 -14  -1  -3    2.54    0.18 
  14  -1   3    2.33    0.17 
 -14   1  -3    2.17    0.17 
  14   1   3    2.06    0.18 
  15  -1   3    1.72    0.18 
 -15  -1  -3    1.89    0.19 
 -15   1  -3    1.81    0.18 
  15   1   3    1.74    0.18 
  16  -1   3    1.88    0.19 
 -16  -1  -3    2.00    0.20 
  16   1   3    1.08    0.15 
 -16   1  -3    1.28    0.15 
  17  -1   3    0.04    0.10 
 -17  -1  -3    0.02    0.11 
  17   1   3   -0.17    0.09 
 -17   1  -3   -0.18    0.10 
 -18  -1  -3    2.73    0.24 
  18  -1   3    2.80    0.23 
  18   1   3    3.72    0.26 
 -18   1  -3    3.70    0.25 
  19   2  -3    2.44    0.32 
 -18  -2   3    3.86    0.26 
  18  -2  -3    4.03    0.24 
  18   2  -3    4.70    0.28 
  17  -2  -3    1.70    0.19 
 -17  -2   3    1.51    0.17 
  17   2  -3    2.38    0.22 
 -16  -2   3    1.66    0.19 
  16  -2  -3    1.67    0.17 
 -16   2   3    1.01    0.14 
  16   2  -3    0.89    0.14 
  15  -2  -3    1.79    0.16 
 -15  -2   3    2.17    0.19 
 -15   2   3    2.12    0.17 
  15   2  -3    1.64    0.18 
  14  -2  -3    2.19    0.16 
 -14  -2   3    2.59    0.19 
  14   2  -3    2.40    0.18 
 -14   2   3    2.20    0.16 
 -13  -2   3    5.19    0.23 
  13  -2  -3    5.47    0.21 
 -13   2   3    6.26    0.23 
  13   2  -3    6.31    0.24 
  12  -2  -3    2.55    0.16 
  12  -2  -3    2.60    0.15 
 -12  -2   3    2.78    0.17 
  12   2  -3    4.59    0.18 
 -12   2   3    4.15    0.18 
  12   2  -3    4.25    0.19 
 -11  -2   3    4.35    0.19 
  11  -2  -3    3.73    0.16 
  11  -2  -3    4.30    0.18 
  11   2  -3    4.87    0.17 
 -11   2   3    4.70    0.18 
  11   2  -3    4.65    0.20 
 -11   2   3    4.81    0.15 
 -10  -2   3   24.64    0.47 
  10  -2  -3   25.05    0.49 
  10  -2  -3   24.34    0.46 
  10   2  -3   26.98    0.49 
 -10   2   3   27.62    0.46 
  10   2  -3   27.12    0.52 
 -10   2   3   27.56    0.50 
   9  -2  -3    9.06    0.23 
  -9  -2   3    9.33    0.21 
  -9  -2   3    8.98    0.24 
   9  -2  -3    9.26    0.25 
  -9   2   3    8.04    0.22 
   9   2  -3    8.25    0.21 
  -9   2   3    8.20    0.18 
   9   2  -3    8.34    0.23 
  -8  -2   3   69.04    0.99 
  -8  -2   3   69.11    1.04 
   8  -2  -3   67.48    1.02 
   8  -2  -3   66.40    1.04 
   8   2  -3   64.87    0.97 
  -8   2   3   65.13    0.98 
   8   2  -3   62.11    0.98 
  -8   2   3   64.98    0.92 
  -7  -2   3    5.24    0.16 
  -7  -2   3    5.25    0.13 
   7  -2  -3    4.98    0.15 
   7  -2  -3    5.18    0.16 
   7   2  -3    5.00    0.15 
  -7   2   3    4.79    0.15 
   7   2  -3    4.52    0.16 
  -7   2   3    4.91    0.12 
  -6  -2   3   35.99    0.58 
  -6  -2   3   35.85    0.54 
   6  -2  -3   36.18    0.59 
   6  -2  -3   35.43    0.57 
   6   2  -3   31.85    0.54 
  -6   2   3   33.16    0.48 
  -6   2   3   32.18    0.53 
   6   2  -3   33.21    0.53 
  -5  -2   3   35.52    0.52 
  -5  -2   3   34.22    0.55 
   5  -2  -3   34.70    0.56 
   5  -2  -3   34.91    0.55 
   5   2  -3   37.88    0.60 
  -5   2   3   38.76    0.54 
  -5   2   3   37.92    0.60 
   5   2  -3   38.73    0.59 
  -4  -2   3   31.93    0.51 
   4  -2  -3   31.47    0.51 
  -4  -2   3   32.64    0.48 
   4  -2  -3   32.05    0.51 
   4   2  -3   32.04    0.49 
   4   2  -3   31.07    0.51 
  -4   2   3   33.07    0.45 
  -4   2   3   31.82    0.51 
   3  -2  -3    7.87    0.17 
  -3  -2   3    7.55    0.17 
  -3  -2   3    7.76    0.17 
   3  -2  -3    7.72    0.17 
  -3  -2   3    7.94    0.15 
  -3   2   3    7.40    0.17 
   3   2  -3    7.47    0.17 
   3   2  -3    7.61    0.15 
   2  -2  -3    2.86    0.09 
  -2  -2   3    2.85    0.09 
  -2  -2   3    3.00    0.08 
  -2  -2   3    2.83    0.08 
  -2  -2   3    2.74    0.09 
  -2   2   3    3.38    0.10 
  -1  -2   3    6.81    0.14 
   1  -2  -3    6.93    0.16 
  -1  -2   3    6.97    0.14 
   1  -2  -3    6.84    0.15 
  -1  -2   3    6.64    0.15 
  -1  -2   3    6.65    0.14 
   1  -2  -3    6.89    0.11 
  -1   2   3    6.67    0.14 
   0  -2  -3    8.99    0.18 
   0  -2   3    8.41    0.17 
   0  -2   3    8.81    0.16 
   0  -2  -3    8.67    0.18 
   0  -2  -3    8.84    0.15 
   0  -2   3    8.97    0.18 
   0  -2   3    8.70    0.17 
   0   2   3    9.43    0.17 
   1  -2   3    2.55    0.07 
   1  -2   3    2.62    0.08 
  -1  -2  -3    2.62    0.09 
   1  -2   3    2.66    0.09 
  -1  -2  -3    2.73    0.07 
  -1   2  -3    3.03    0.10 
   1   2   3    3.03    0.08 
  -2  -2  -3   16.64    0.30 
   2  -2   3   17.34    0.26 
   2  -2   3   16.81    0.30 
   2  -2   3   16.50    0.29 
  -2  -2  -3   17.22    0.28 
   2   2   3   18.13    0.27 
  -2   2  -3   17.80    0.31 
   2   2   3   17.41    0.32 
   3  -2   3   31.79    0.44 
  -3  -2  -3   30.84    0.50 
   3  -2   3   30.62    0.49 
  -3  -2  -3   31.24    0.48 
   3  -2   3   31.66    0.50 
  -3   2  -3   31.36    0.50 
   3   2   3   32.72    0.44 
   3   2   3   30.86    0.52 
   4  -2   3   29.61    0.48 
  -4  -2  -3   29.64    0.48 
   4  -2   3   29.19    0.48 
   4  -2   3   29.86    0.42 
  -4  -2  -3   29.79    0.47 
  -4   2  -3   29.78    0.48 
   4   2   3   29.72    0.51 
   5  -2   3   12.93    0.20 
   5  -2   3   12.58    0.26 
  -5  -2  -3   12.74    0.25 
  -5  -2  -3   13.08    0.26 
  -5   2  -3   17.30    0.32 
   5   2   3   17.47    0.35 
  -5   2  -3   17.39    0.32 
   6  -2   3   40.83    0.67 
  -6  -2  -3   42.08    0.66 
  -6  -2  -3   42.26    0.66 
   6  -2   3   43.16    0.59 
  -6   2  -3   45.83    0.71 
   6   2   3   46.13    0.76 
  -6   2  -3   45.61    0.71 
  -7  -2  -3   10.60    0.25 
   7  -2   3   11.31    0.19 
   7  -2   3   10.83    0.25 
  -7  -2  -3   11.32    0.25 
   7   2   3    8.98    0.25 
  -7   2  -3    9.17    0.21 
  -7   2  -3    8.55    0.21 
  -8  -2  -3   21.62    0.41 
  -8  -2  -3   21.29    0.40 
   8  -2   3   21.39    0.42 
  -8   2  -3   24.18    0.44 
   8   2   3   24.55    0.49 
  -8   2  -3   24.96    0.44 
   9  -2   3    2.79    0.14 
  -9  -2  -3    2.48    0.14 
  -9  -2  -3    2.80    0.13 
  -9   2  -3    3.26    0.14 
  -9   2  -3    3.03    0.14 
   9   2   3    3.21    0.17 
 -10  -2  -3   24.97    0.48 
  10  -2   3   24.68    0.49 
  10   2   3   25.21    0.52 
 -10   2  -3   25.71    0.47 
 -10   2  -3   25.33    0.47 
  10   2   3   25.58    0.48 
 -11  -2  -3    5.62    0.21 
  11  -2   3    5.99    0.22 
 -11   2  -3    7.27    0.22 
  11   2   3    6.87    0.25 
 -11   2  -3    6.84    0.22 
  11   2   3    6.90    0.23 
 -12  -2  -3    8.99    0.28 
  12  -2   3    7.92    0.27 
 -12   2  -3    8.28    0.25 
 -12   2  -3    8.19    0.25 
  12   2   3    8.37    0.26 
  12   2   3    8.34    0.29 
  13  -2   3    7.33    0.26 
 -13  -2  -3    7.12    0.26 
 -13   2  -3    7.75    0.25 
  13   2   3    7.26    0.25 
  13   2   3    7.03    0.28 
 -13   2  -3    8.00    0.25 
  14  -2   3    7.12    0.27 
 -14  -2  -3    6.96    0.27 
 -14   2  -3    8.12    0.27 
  14   2   3    7.88    0.30 
 -14   2  -3    8.43    0.27 
  14   2   3    7.65    0.27 
  15  -2   3    0.46    0.11 
 -15  -2  -3    0.50    0.12 
 -15   2  -3    1.15    0.17 
 -15   2  -3    1.14    0.13 
  15   2   3    0.94    0.13 
  15   2   3    1.04    0.15 
 -16  -2  -3    2.66    0.22 
  16  -2   3    2.80    0.21 
 -16   2  -3    2.22    0.21 
  16   2   3    2.70    0.22 
  17  -2   3    2.44    0.21 
 -17  -2  -3    2.30    0.23 
  17   2   3    2.20    0.21 
  18   2   3    0.21    0.12 
  18  -3  -3    0.49    0.12 
 -18   3   3    0.88    0.16 
  18   3  -3    0.69    0.18 
 -17  -3   3    2.30    0.23 
  17  -3  -3    2.64    0.22 
  17   3  -3    2.25    0.23 
 -17   3   3    2.12    0.21 
  16  -3  -3    2.02    0.20 
 -16  -3   3    2.63    0.23 
 -16   3   3    1.73    0.19 
  16   3  -3    2.11    0.21 
 -15  -3   3    5.43    0.26 
  15  -3  -3    5.73    0.26 
 -15   3   3    4.14    0.23 
  15   3  -3    4.17    0.25 
 -14  -3   3    1.48    0.16 
  14  -3  -3    1.24    0.14 
 -14   3   3    1.75    0.17 
  14   3  -3    1.58    0.18 
 -13  -3   3    2.34    0.19 
  13  -3  -3    2.35    0.17 
 -13   3   3    1.89    0.16 
  13   3  -3    1.64    0.17 
 -12  -3   3    2.68    0.18 
  12  -3  -3    2.62    0.17 
  12   3  -3    1.92    0.17 
 -12   3   3    1.53    0.15 
  11  -3  -3   12.62    0.32 
 -11  -3   3   11.86    0.33 
 -11   3   3   12.41    0.33 
  11   3  -3   12.13    0.33 
  10  -3  -3    2.21    0.14 
 -10  -3   3    2.43    0.15 
  10  -3  -3    2.07    0.12 
 -10   3   3    3.58    0.17 
  10   3  -3    3.62    0.16 
  10   3  -3    3.73    0.18 
  -9  -3   3    3.04    0.16 
   9  -3  -3    2.86    0.15 
   9  -3  -3    2.86    0.13 
   9   3  -3    3.99    0.18 
  -9   3   3    3.59    0.16 
   9   3  -3    4.19    0.17 
  -8  -3   3    0.95    0.10 
   8  -3  -3    0.90    0.10 
   8  -3  -3    1.13    0.09 
   8   3  -3    0.94    0.10 
   8   3  -3    0.78    0.09 
  -8   3   3    0.92    0.10 
  -7  -3   3   12.93    0.29 
  -7  -3   3   13.35    0.23 
   7  -3  -3   13.28    0.28 
   7  -3  -3   12.67    0.29 
   7   3  -3   13.04    0.30 
  -7   3   3   13.10    0.30 
   7   3  -3   13.30    0.29 
   6  -3  -3    6.96    0.20 
  -6  -3   3    6.52    0.19 
   6  -3  -3    6.88    0.18 
  -6  -3   3    7.12    0.15 
   6   3  -3    7.85    0.21 
   6   3  -3    7.80    0.20 
  -6   3   3    7.60    0.21 
  -5  -3   3   16.20    0.28 
  -5  -3   3   15.92    0.32 
   5  -3  -3   15.59    0.32 
  -5  -3   3   15.92    0.32 
   5  -3  -3   15.54    0.31 
   5   3  -3   18.13    0.34 
  -5   3   3   17.74    0.34 
   5   3  -3   17.98    0.35 
   4  -3  -3   18.79    0.35 
  -4  -3   3   18.44    0.35 
  -4  -3   3   18.96    0.35 
  -4  -3   3   19.01    0.32 
   4  -3  -3   18.36    0.35 
  -4   3   3   16.34    0.32 
   4   3  -3   16.23    0.30 
  -3  -3   3   10.07    0.22 
   3  -3  -3   10.17    0.23 
   3  -3  -3    9.81    0.22 
  -3  -3   3   10.09    0.22 
  -3  -3   3   10.24    0.20 
  -3   3   3   10.95    0.17 
  -3   3   3   10.34    0.22 
   3   3  -3   10.09    0.22 
  -2  -3   3    0.20    0.04 
  -2  -3   3    0.14    0.04 
   2  -3  -3    0.15    0.04 
   2  -3  -3    0.19    0.04 
  -2  -3   3    0.22    0.04 
  -2  -3   3    0.15    0.04 
  -2   3   3    0.83    0.04 
  -2   3   3    0.81    0.07 
   1  -3  -3   33.25    0.54 
  -1  -3   3   32.45    0.53 
   1  -3  -3   32.67    0.53 
  -1  -3   3   32.34    0.52 
  -1  -3   3   32.16    0.51 
  -1  -3   3   33.19    0.52 
   1  -3  -3   33.27    0.48 
  -1   3   3   31.90    0.50 
   0  -3  -3    3.37    0.09 
   0  -3   3    3.53    0.11 
   0  -3  -3    3.32    0.12 
   0  -3   3    3.43    0.11 
   0  -3   3    3.28    0.11 
   0  -3  -3    3.36    0.12 
   0  -3   3    3.37    0.10 
   0   3   3    3.38    0.10 
  -1  -3  -3   12.85    0.27 
   1  -3   3   12.98    0.26 
  -1  -3  -3   13.44    0.23 
   1  -3   3   13.04    0.24 
   1  -3   3   13.03    0.26 
   1   3   3   10.60    0.20 
   1   3   3   10.80    0.24 
  -1   3  -3   10.69    0.23 
  -2  -3  -3    1.76    0.10 
   2  -3   3    1.78    0.09 
   2  -3   3    1.71    0.07 
   2  -3   3    1.67    0.09 
  -2  -3  -3    1.79    0.08 
  -2   3  -3    2.31    0.10 
   2   3   3    2.55    0.08 
   2   3   3    2.39    0.11 
   3  -3   3   14.89    0.25 
  -3  -3  -3   14.74    0.27 
   3  -3   3   14.46    0.29 
   3  -3   3   14.11    0.29 
  -3  -3  -3   14.29    0.30 
  -3   3  -3   14.46    0.29 
   3   3   3   14.68    0.24 
   3   3   3   14.27    0.30 
  -4  -3  -3   13.36    0.26 
   4  -3   3   13.46    0.23 
   4  -3   3   12.93    0.28 
  -4  -3  -3   12.78    0.28 
   4   3   3   11.20    0.18 
  -4   3  -3   10.68    0.24 
   4   3   3   11.14    0.26 
  -4   3  -3   10.84    0.24 
  -5  -3  -3    5.95    0.17 
   5  -3   3    6.09    0.18 
  -5  -3  -3    5.94    0.18 
   5  -3   3    6.13    0.13 
  -5   3  -3    6.80    0.19 
   5   3   3    6.68    0.21 
  -5   3  -3    6.93    0.18 
  -6  -3  -3   38.14    0.64 
  -6  -3  -3   37.70    0.62 
   6  -3   3   38.01    0.64 
  -6   3  -3   39.32    0.65 
   6   3   3   38.76    0.68 
  -6   3  -3   39.05    0.63 
  -7  -3  -3    8.80    0.24 
   7  -3   3    8.44    0.23 
  -7  -3  -3    8.44    0.23 
  -7   3  -3   10.38    0.26 
   7   3   3   10.16    0.29 
  -7   3  -3   10.47    0.24 
   8  -3   3    1.24    0.12 
  -8  -3  -3    1.01    0.11 
  -8  -3  -3    1.15    0.12 
  -8   3  -3    0.99    0.11 
  -8   3  -3    0.89    0.10 
   8   3   3    0.97    0.11 
  -9  -3  -3    0.76    0.10 
   9  -3   3    0.84    0.10 
  -9  -3  -3    0.92    0.10 
  -9   3  -3    1.13    0.11 
   9   3   3    1.28    0.14 
  -9   3  -3    1.04    0.11 
  10  -3   3    7.64    0.25 
 -10  -3  -3    7.21    0.24 
 -10  -3  -3    7.27    0.24 
  10   3   3    5.96    0.25 
 -10   3  -3    6.10    0.22 
 -10   3  -3    6.74    0.21 
 -11  -3  -3    9.08    0.28 
  11  -3   3    9.66    0.29 
 -11   3  -3   11.39    0.31 
  11   3   3   11.04    0.31 
 -11   3  -3   11.48    0.29 
  11   3   3   10.77    0.34 
 -12  -3  -3    2.31    0.17 
  12  -3   3    2.14    0.17 
  12   3   3    1.84    0.16 
  12   3   3    1.50    0.17 
 -12   3  -3    1.79    0.16 
  13  -3   3    2.74    0.20 
 -13  -3  -3    2.91    0.20 
  13   3   3    2.93    0.19 
  13   3   3    2.53    0.20 
 -13   3  -3    2.73    0.19 
 -14  -3  -3    2.48    0.20 
  14  -3   3    2.42    0.19 
  14   3   3    2.25    0.19 
 -14   3  -3    1.90    0.18 
  14   3   3    2.20    0.20 
  15  -3   3    2.13    0.19 
 -15  -3  -3    2.70    0.22 
  15   3   3    2.18    0.21 
  15   3   3    2.07    0.19 
 -15   3  -3    2.33    0.20 
  16  -3   3    1.55    0.18 
 -16  -3  -3    1.27    0.17 
 -16   3  -3    1.75    0.20 
  16   3   3    2.36    0.22 
  16   3   3    1.97    0.21 
  16  -4  -3    2.48    0.23 
 -16   4   3    1.96    0.22 
  16   4  -3    2.04    0.23 
  15  -4  -3    1.33    0.16 
 -15  -4   3    1.29    0.17 
  15   4  -3    1.18    0.17 
 -15   4   3    0.79    0.14 
  14  -4  -3    6.56    0.28 
 -14  -4   3    6.95    0.30 
 -14   4   3    7.38    0.29 
  14   4  -3    7.54    0.32 
  13  -4  -3    1.86    0.17 
 -13  -4   3    1.71    0.19 
  13   4  -3    1.91    0.20 
 -13   4   3    1.88    0.19 
 -12  -4   3    3.72    0.21 
  12  -4  -3    3.35    0.20 
 -12   4   3    3.93    0.21 
  12   4  -3    3.77    0.23 
  11  -4  -3    4.92    0.22 
 -11  -4   3    4.57    0.23 
  11   4  -3    4.81    0.24 
 -11   4   3    5.10    0.23 
 -10  -4   3    4.47    0.21 
  10  -4  -3    4.68    0.21 
  10   4  -3    5.78    0.24 
 -10   4   3    5.37    0.23 
  -9  -4   3    2.05    0.16 
   9  -4  -3    2.16    0.15 
   9   4  -3    1.51    0.14 
  -9   4   3    1.27    0.14 
   8  -4  -3   14.96    0.32 
  -8  -4   3   13.93    0.35 
   8  -4  -3   14.72    0.35 
   8   4  -3   13.68    0.35 
  -8   4   3   14.11    0.34 
   8   4  -3   14.21    0.34 
   7  -4  -3    0.12    0.06 
   7  -4  -3    0.06    0.05 
  -7  -4   3    0.14    0.07 
   7   4  -3    0.12    0.06 
   7   4  -3    0.13    0.07 
  -7   4   3    0.06    0.07 
   6  -4  -3   17.71    0.39 
  -6  -4   3   18.69    0.38 
  -6  -4   3   18.29    0.39 
   6  -4  -3   18.39    0.36 
   6   4  -3   15.44    0.34 
  -6   4   3   15.40    0.34 
  -5  -4   3    3.81    0.16 
   5  -4  -3    3.88    0.16 
  -5  -4   3    3.82    0.15 
   5  -4  -3    3.89    0.15 
  -5  -4   3    3.96    0.12 
  -5   4   3    4.20    0.17 
   5   4  -3    4.53    0.16 
  -4  -4   3    9.38    0.24 
  -4  -4   3    9.40    0.21 
   4  -4  -3    9.43    0.23 
   4  -4  -3    9.02    0.25 
  -4  -4   3    8.88    0.24 
  -4   4   3    7.05    0.20 
   4   4  -3    6.87    0.20 
  -3  -4   3   12.56    0.28 
  -3  -4   3   12.55    0.26 
   3  -4  -3   12.67    0.29 
  -3  -4   3   12.03    0.28 
   3  -4  -3   12.64    0.28 
   3   4  -3   11.79    0.27 
  -3   4   3   11.91    0.27 
  -2  -4   3    4.56    0.16 
   2  -4  -3    4.55    0.17 
  -2  -4   3    4.26    0.15 
  -2  -4   3    4.74    0.14 
  -2  -4   3    4.34    0.15 
   2  -4  -3    4.40    0.16 
  -2   4   3    4.88    0.15 
   1  -4  -3    3.25    0.10 
  -1  -4   3    3.36    0.13 
   1  -4  -3    3.23    0.14 
  -1  -4   3    3.27    0.13 
  -1  -4   3    3.37    0.13 
  -1  -4   3    3.39    0.13 
  -1   4   3    2.65    0.11 
   0  -4   3   27.72    0.48 
   0  -4  -3   27.96    0.44 
   0  -4   3   27.16    0.47 
   0  -4   3   27.48    0.49 
   0  -4  -3   27.57    0.50 
   0  -4  -3   28.18    0.50 
   0  -4   3   27.81    0.48 
   0   4   3   27.34    0.46 
  -1  -4  -3    2.37    0.09 
   1  -4   3    2.07    0.11 
  -1  -4  -3    2.54    0.13 
   1  -4   3    2.43    0.10 
   1  -4   3    2.51    0.12 
  -1   4  -3    2.70    0.12 
   1   4   3    2.63    0.10 
   1   4   3    2.59    0.13 
   2  -4   3   18.47    0.33 
  -2  -4  -3   18.59    0.38 
  -2  -4  -3   19.03    0.34 
   2  -4   3   18.00    0.37 
   2   4   3   20.00    0.40 
   2   4   3   19.12    0.33 
  -2   4  -3   19.10    0.37 
  -2   4  -3   18.95    0.37 
   3  -4   3    4.77    0.13 
  -3  -4  -3    4.50    0.17 
  -3  -4  -3    5.02    0.15 
   3  -4   3    4.42    0.16 
  -3   4  -3    5.25    0.17 
  -3   4  -3    5.15    0.17 
   3   4   3    5.12    0.19 
  -4  -4  -3   10.49    0.24 
   4  -4   3   10.71    0.22 
   4  -4   3   10.52    0.27 
  -4  -4  -3   10.30    0.27 
  -4   4  -3   10.32    0.26 
   4   4   3   10.04    0.27 
  -4   4  -3   10.21    0.25 
  -5  -4  -3    7.64    0.21 
  -5  -4  -3    7.57    0.23 
   5  -4   3    7.31    0.23 
  -5   4  -3    8.15    0.23 
  -5   4  -3    7.75    0.21 
   5   4   3    7.67    0.24 
   6  -4   3   14.10    0.34 
  -6  -4  -3   14.69    0.34 
  -6  -4  -3   14.59    0.32 
  -6   4  -3   13.92    0.32 
  -6   4  -3   12.80    0.29 
   6   4   3   14.01    0.35 
  -7  -4  -3    0.78    0.10 
   7  -4   3    0.77    0.10 
  -7  -4  -3    0.99    0.11 
   7   4   3    1.66    0.15 
  -7   4  -3    1.44    0.14 
   8  -4   3   15.04    0.37 
  -8  -4  -3   14.82    0.36 
  -8  -4  -3   15.52    0.36 
  -8   4  -3   13.17    0.34 
   8   4   3   13.41    0.37 
  -9  -4  -3    7.44    0.26 
  -9  -4  -3    7.01    0.24 
   9  -4   3    7.08    0.26 
   9   4   3    7.47    0.28 
  -9   4  -3    8.21    0.26 
 -10  -4  -3    6.28    0.24 
  10  -4   3    6.88    0.26 
 -10  -4  -3    6.56    0.25 
  10   4   3    7.39    0.28 
 -10   4  -3    7.26    0.26 
 -11  -4  -3    8.17    0.28 
  11  -4   3    8.59    0.30 
 -11   4  -3    7.83    0.27 
  11   4   3    7.56    0.30 
  11   4   3    7.83    0.28 
  12  -4   3    2.50    0.19 
 -12  -4  -3    2.68    0.20 
  12   4   3    1.79    0.17 
 -12   4  -3    1.70    0.18 
  12   4   3    2.06    0.20 
  13  -4   3    2.86    0.21 
 -13  -4  -3    2.55    0.20 
 -13   4  -3    2.38    0.20 
  13   4   3    2.28    0.21 
  13   4   3    2.59    0.22 
  14  -4   3    1.37    0.17 
 -14  -4  -3    1.62    0.17 
  14   4   3    1.07    0.16 
  14   4   3    0.82    0.15 
 -14   4  -3    1.03    0.15 
 -15  -4  -3    2.24    0.23 
  15  -4   3    1.76    0.19 
 -15   4  -3    2.99    0.23 
  15   4   3    2.57    0.24 
 -16   4  -3    3.44    0.25 
  16   4   3    3.65    0.25 
  14  -5  -3    1.58    0.18 
 -14  -5   3    1.69    0.19 
 -14   5   3    1.90    0.22 
  14   5  -3    1.85    0.22 
  13  -5  -3    4.63    0.25 
 -13  -5   3    4.08    0.25 
 -13   5   3    2.90    0.23 
  13   5  -3    3.08    0.24 
  12  -5  -3    1.47    0.16 
 -12  -5   3    1.50    0.17 
  12   5  -3    1.41    0.17 
 -12   5   3    1.46    0.17 
 -11  -5   3    2.86    0.21 
  11  -5  -3    2.75    0.20 
  11   5  -3    3.05    0.23 
 -11   5   3    3.19    0.22 
  10  -5  -3    1.58    0.17 
 -10  -5   3    1.31    0.15 
 -10   5   3    2.08    0.18 
  10   5  -3    2.10    0.20 
  -9  -5   3    1.57    0.16 
   9  -5  -3    1.39    0.16 
  -9   5   3    2.30    0.19 
   9   5  -3    2.14    0.18 
  -8  -5   3    0.18    0.09 
   8  -5  -3    0.19    0.09 
  -8   5   3    0.20    0.09 
   8   5  -3    0.18    0.09 
   7  -5  -3    1.92    0.17 
  -7  -5   3    1.64    0.14 
   7  -5  -3    1.41    0.15 
   7   5  -3    2.17    0.18 
   7   5  -3    1.95    0.16 
  -7   5   3    2.05    0.16 
  -6  -5   3    0.74    0.11 
   6  -5  -3    0.94    0.10 
   6  -5  -3    0.63    0.10 
  -6  -5   3    0.86    0.10 
  -6   5   3    0.44    0.09 
   6   5  -3    0.48    0.09 
  -5  -5   3    5.47    0.21 
   5  -5  -3    5.44    0.22 
   5  -5  -3    5.40    0.19 
  -5  -5   3    5.10    0.20 
   5   5  -3    6.44    0.22 
  -5   5   3    6.16    0.22 
  -4  -5   3    5.17    0.20 
   4  -5  -3    4.99    0.19 
  -4  -5   3    5.05    0.19 
   4   5  -3    4.71    0.19 
  -4   5   3    4.79    0.19 
  -3  -5   3    5.15    0.19 
  -3  -5   3    5.26    0.17 
  -3  -5   3    5.43    0.19 
   3  -5  -3    4.96    0.21 
   3  -5  -3    5.44    0.19 
  -3   5   3    5.87    0.20 
   3   5  -3    6.26    0.21 
  -2  -5   3    4.19    0.17 
  -2  -5   3    4.54    0.18 
   2  -5  -3    4.54    0.19 
   2  -5  -3    4.96    0.19 
   2   5  -3    5.20    0.19 
  -2   5   3    4.99    0.18 
   2   5  -3    4.71    0.17 
  -1  -5   3   10.83    0.29 
   1  -5  -3   10.47    0.29 
  -1  -5   3   10.72    0.27 
  -1  -5   3   11.63    0.28 
   1  -5  -3   10.94    0.28 
   1   5  -3   10.12    0.25 
  -1   5   3    9.72    0.25 
   0  -5  -3    2.53    0.15 
   0  -5   3    2.55    0.13 
   0  -5   3    2.75    0.15 
   0   5   3    2.38    0.15 
   0   5  -3    2.40    0.13 
   0   5  -3    2.42    0.14 
   0   5   3    2.30    0.12 
  -1  -5  -3   22.74    0.46 
   1  -5   3   23.38    0.43 
   1  -5   3   22.03    0.45 
  -1   5  -3   21.70    0.43 
   1   5   3   22.26    0.46 
  -1   5  -3   21.12    0.43 
   2  -5   3    2.47    0.12 
  -2  -5  -3    2.25    0.15 
   2  -5   3    2.26    0.14 
   2   5   3    1.94    0.15 
  -2   5  -3    1.58    0.12 
   3  -5   3   11.90    0.31 
  -3  -5  -3   11.89    0.32 
   3   5   3   14.89    0.37 
  -3   5  -3   14.77    0.35 
  -4  -5  -3    4.05    0.16 
   4  -5   3    3.93    0.19 
  -4  -5  -3    3.93    0.19 
   4   5   3    3.93    0.19 
  -4   5  -3    3.70    0.18 
   5  -5   3    0.29    0.09 
  -5  -5  -3    0.31    0.09 
  -5  -5  -3    0.41    0.08 
   5   5   3    0.78    0.11 
  -5   5  -3    0.89    0.11 
   6  -5   3    1.64    0.15 
  -6  -5  -3    1.59    0.13 
  -6  -5  -3    1.33    0.15 
   6   5   3    2.02    0.17 
  -6   5  -3    1.75    0.16 
  -7  -5  -3    1.11    0.13 
  -7  -5  -3    1.25    0.14 
   7  -5   3    1.42    0.16 
  -7   5  -3    1.98    0.17 
   7   5   3    1.89    0.18 
   8  -5   3    0.83    0.12 
  -8  -5  -3    0.87    0.13 
  -8  -5  -3    0.92    0.11 
  -8   5  -3    0.48    0.11 
   8   5   3    0.48    0.12 
  -9  -5  -3    1.11    0.13 
   9  -5   3    0.99    0.14 
  -9  -5  -3    1.07    0.14 
  -9   5  -3    1.37    0.15 
   9   5   3    0.98    0.15 
  10  -5   3    5.95    0.27 
 -10  -5  -3    5.62    0.26 
 -10  -5  -3    5.53    0.25 
  10   5   3    4.87    0.26 
 -10   5  -3    4.97    0.24 
 -11  -5  -3    0.76    0.14 
  11  -5   3    0.62    0.13 
 -11  -5  -3    0.85    0.13 
  11   5   3    0.69    0.14 
 -11   5  -3    0.67    0.13 
  12  -5   3    2.43    0.21 
 -12  -5  -3    2.12    0.21 
  12   5   3    2.73    0.23 
  12   5   3    2.22    0.22 
 -12   5  -3    2.43    0.22 
 -13  -5  -3    1.59    0.18 
  13  -5   3    1.43    0.18 
  13   5   3    2.01    0.22 
 -13   5  -3    2.81    0.24 
  13   5   3    2.16    0.23 
 -14  -5  -3    5.56    0.32 
 -12  -6   3    3.53    0.25 
 -11  -6   3    0.74    0.14 
  11  -6  -3    0.17    0.12 
  11   6  -3    0.83    0.16 
 -11   6   3    1.13    0.17 
 -10  -6   3    1.55    0.17 
  10  -6  -3    1.69    0.20 
 -10   6   3    1.52    0.18 
  10   6  -3    1.10    0.16 
  -9  -6   3    0.11    0.10 
   9  -6  -3    0.21    0.12 
   9   6  -3    0.22    0.12 
  -9   6   3    0.14    0.11 
  -8  -6   3    0.12    0.10 
   8  -6  -3    0.20    0.11 
  -8   6   3    0.06    0.10 
   8   6  -3    0.18    0.11 
   7  -6  -3    0.12    0.10 
  -7  -6   3    0.19    0.09 
  -7   6   3    0.13    0.10 
   7   6  -3    0.05    0.10 
  -6  -6   3    1.44    0.15 
  -6  -6   3    1.48    0.17 
   6  -6  -3    1.45    0.17 
  -6   6   3    0.98    0.13 
   5  -6  -3    0.76    0.13 
   5  -6  -3    0.80    0.14 
  -5  -6   3    0.78    0.11 
  -5  -6   3    0.72    0.12 
  -5   6   3    0.90    0.12 
   5   6  -3    0.81    0.13 
  -4  -6   3    0.77    0.11 
   4  -6  -3    0.62    0.10 
  -4  -6   3    0.50    0.10 
   4  -6  -3    0.39    0.11 
   4   6  -3    1.29    0.15 
  -4   6   3    1.04    0.12 
   3  -6  -3    3.24    0.18 
   3  -6  -3    3.21    0.21 
  -3  -6   3    3.36    0.18 
  -3   6   3    3.85    0.19 
   3   6  -3    4.15    0.20 
   2  -6  -3    6.51    0.24 
  -2  -6   3    6.90    0.24 
   2  -6  -3    6.77    0.26 
  -2   6   3    7.17    0.24 
   2   6  -3    7.82    0.27 
   1  -6  -3    2.26    0.17 
  -1  -6   3    2.52    0.17 
  -1  -6   3    2.53    0.16 
   1   6  -3    2.41    0.16 
  -1   6   3    1.85    0.17 
   0  -6   3   10.29    0.31 
   0  -6  -3   10.96    0.32 
   0  -6   3   11.09    0.29 
   0   6   3   10.99    0.34 
   0   6  -3   11.57    0.30 
   1  -6   3    1.14    0.13 
  -1  -6  -3    1.35    0.15 
   1   6   3    1.39    0.15 
  -1   6  -3    1.23    0.14 
  -2  -6  -3    7.48    0.27 
   2  -6   3    6.92    0.26 
   2   6   3    5.28    0.24 
  -2   6  -3    5.05    0.22 
  -3  -6  -3    0.88    0.12 
   3  -6   3    0.84    0.12 
  -3   6  -3    0.68    0.11 
   3   6   3    0.87    0.13 
  -4  -6  -3    9.15    0.31 
   4  -6   3    8.59    0.29 
   4   6   3    7.96    0.30 
  -4   6  -3    7.73    0.28 
  -5  -6  -3    2.32    0.19 
   5  -6   3    1.89    0.18 
  -5   6  -3    2.17    0.19 
   5   6   3    2.48    0.20 
   6  -6   3    6.28    0.27 
  -6  -6  -3    6.26    0.27 
   6   6   3    6.60    0.29 
  -6   6  -3    6.28    0.27 
   7  -6   3    0.39    0.12 
  -7  -6  -3    0.18    0.11 
  -7   6  -3    0.36    0.12 
   7   6   3    0.24    0.11 
   8  -6   3    2.48    0.21 
  -8  -6  -3    2.10    0.21 
   8   6   3    2.47    0.22 
  -8   6  -3    2.61    0.22 
   9  -6   3    3.13    0.23 
  -9  -6  -3    3.26    0.24 
   9   6   3    3.87    0.27 
  -9   6  -3    4.13    0.24 
 -10  -6  -3    0.58    0.13 
  10  -6   3    0.47    0.14 
 -10  -6  -3    0.57    0.14 
 -10   6  -3    0.72    0.15 
  10   6   3    0.77    0.15 
 -11  -6  -3    7.76    0.32 
  11   6   3    8.09    0.37 
 -12  -6  -3    1.47    0.18 
   8   7  -3    0.19    0.15 
  -8   7   3    0.14    0.12 
   7  -7  -3    1.03    0.18 
   7   7  -3    0.91    0.16 
  -7   7   3    0.82    0.15 
   6  -7  -3    0.35    0.13 
   6   7  -3    0.02    0.11 
  -6   7   3    0.06    0.11 
  -5  -7   3    0.58    0.12 
   5  -7  -3    0.56    0.14 
  -5   7   3    0.87    0.14 
   4  -7  -3    1.91    0.22 
  -4  -7   3    2.08    0.20 
  -4   7   3    1.66    0.17 
  -3  -7   3    1.24    0.15 
   3  -7  -3    1.19    0.16 
   2  -7  -3    3.44    0.22 
  -2  -7   3    3.32    0.21 
   2   7  -3    2.40    0.20 
  -2   7   3    2.22    0.21 
   1  -7  -3    7.26    0.29 
  -1   7   3    7.38    0.31 
   1   7  -3    7.64    0.30 
   0  -7  -3    0.76    0.13 
   0  -7   3    0.91    0.14 
   0   7   3    0.76    0.14 
   1  -7   3    7.55    0.30 
  -1  -7  -3    7.80    0.30 
   1   7   3    7.41    0.30 
   2  -7   3    0.08    0.10 
  -2  -7  -3   -0.09    0.09 
  -2   7  -3    0.07    0.10 
   2   7   3    0.06    0.11 
   3  -7   3    4.09    0.25 
  -3  -7  -3    4.34    0.25 
   3   7   3    4.38    0.26 
  -3   7  -3    4.50    0.24 
  -4  -7  -3    0.24    0.11 
   4  -7   3    0.17    0.12 
   4   7   3    0.00    0.11 
  -4   7  -3    0.14    0.11 
  -5  -7  -3    0.87    0.15 
   5  -7   3    0.80    0.15 
  -5   7  -3    0.79    0.14 
   5   7   3    0.91    0.16 
  -6  -7  -3    0.08    0.12 
   6  -7   3    0.07    0.11 
   6   7   3    0.00    0.12 
  -6   7  -3    0.18    0.12 
   7  -7   3    0.48    0.15 
  -7   7  -3    0.49    0.14 
   7   7   3    0.29    0.13 
   8   7   3    0.03    0.12 
   9   7   3    1.50    0.32 
   0  -8  -3    2.58    0.29 
 -19   0   4    8.72    0.33 
 -18   0   4    1.17    0.15 
 -17   0   4    5.04    0.24 
 -16   0   4    4.11    0.22 
  16   0  -4    4.20    0.23 
 -15   0   4   10.14    0.30 
  15   0  -4    9.76    0.31 
  14   0  -4   14.06    0.33 
  14   0  -4   13.40    0.36 
 -14   0   4   14.06    0.34 
 -13   0   4    3.51    0.15 
  13   0  -4    3.72    0.18 
 -13   0   4    3.42    0.17 
  13   0  -4    3.58    0.15 
  12   0  -4    2.61    0.15 
 -12   0   4    2.74    0.13 
 -12   0   4    2.77    0.14 
  12   0  -4    2.68    0.13 
 -11   0   4    0.03    0.04 
  11   0  -4   -0.05    0.05 
 -11   0   4    0.04    0.05 
  11   0  -4    0.01    0.04 
 -10   0   4    3.57    0.14 
  10   0  -4    3.28    0.15 
  10   0  -4    3.33    0.12 
 -10   0   4    3.62    0.13 
  -9   0   4    1.82    0.09 
   9   0  -4    1.69    0.09 
   9   0  -4    1.80    0.11 
  -9   0   4    1.81    0.10 
  -8   0   4    5.10    0.15 
  -8   0   4    5.29    0.15 
   8   0  -4    5.29    0.16 
   8   0  -4    5.23    0.13 
  -7   0   4    4.82    0.14 
   7   0  -4    5.17    0.12 
  -7   0   4    5.38    0.14 
   6   0  -4    0.34    0.04 
  -6   0   4    0.34    0.04 
  -6   0   4    0.42    0.05 
   6   0  -4    0.27    0.04 
  -5   0   4   24.50    0.39 
   5   0  -4   23.15    0.40 
  -5   0   4   23.86    0.37 
   5   0  -4   23.80    0.36 
  -4   0   4   49.73    0.71 
   4   0  -4   50.01    0.69 
   4   0  -4   50.02    0.74 
  -4   0   4   49.65    0.72 
  -3   0   4   58.24    0.84 
   3   0  -4   59.29    0.80 
   3   0  -4   58.89    0.84 
  -3   0   4   58.78    0.82 
  -2   0   4    0.14    0.03 
   2   0  -4    0.09    0.02 
   2   0  -4    0.09    0.01 
  -2   0   4    0.06    0.02 
   1   0  -4   23.09    0.34 
  -1   0   4   23.32    0.33 
   1   0  -4   22.67    0.35 
   0   0   4   38.03    0.54 
   0   0  -4   38.10    0.54 
   0   0   4   37.68    0.56 
   0   0  -4   37.75    0.55 
  -1   0  -4   11.76    0.21 
   1   0   4   12.03    0.21 
   1   0   4   11.64    0.20 
  -1   0  -4   11.91    0.19 
  -2   0  -4   16.20    0.27 
  -2   0  -4   16.70    0.25 
   2   0   4   16.87    0.26 
   2   0   4   16.47    0.28 
  -3   0  -4   39.70    0.60 
  -3   0  -4   40.97    0.56 
   3   0   4   40.70    0.57 
   3   0   4   39.49    0.61 
   4   0   4   59.67    0.91 
  -4   0  -4   60.10    0.89 
   4   0   4   62.63    0.86 
  -4   0  -4   62.17    0.85 
   5   0   4    1.18    0.08 
  -5   0  -4    1.18    0.07 
   5   0   4    1.14    0.05 
  -5   0  -4    1.29    0.05 
  -6   0  -4    1.53    0.06 
   6   0   4    1.64    0.06 
   7   0   4    8.90    0.18 
  -7   0  -4    8.59    0.17 
  -7   0  -4    8.27    0.21 
   7   0   4    8.24    0.22 
   8   0   4    1.09    0.07 
  -8   0  -4    0.97    0.09 
  -8   0  -4    0.97    0.06 
   8   0   4    1.10    0.10 
  -9   0  -4   11.11    0.22 
   9   0   4   10.90    0.28 
   9   0   4   10.87    0.23 
  -9   0  -4   10.68    0.26 
  10   0   4    0.30    0.07 
 -10   0  -4    0.34    0.05 
 -10   0  -4    0.24    0.07 
  10   0   4    0.48    0.06 
  11   0   4    6.68    0.19 
 -11   0  -4    6.18    0.21 
  11   0   4    6.44    0.23 
 -12   0  -4    8.93    0.27 
  12   0   4    9.25    0.29 
 -13   0  -4    3.98    0.20 
  13   0   4    4.16    0.20 
 -14   0  -4    4.93    0.23 
  14   0   4    4.81    0.24 
 -15   0  -4   13.22    0.38 
  15   0   4   13.14    0.39 
  16   0   4   -0.02    0.10 
 -16   0  -4    0.05    0.10 
 -17   0  -4    0.57    0.13 
  17   0   4    0.36    0.12 
  18   0   4    0.72    0.15 
 -18   0  -4    0.47    0.14 
 -19  -1   4    0.79    0.15 
 -18  -1   4    0.09    0.11 
  18   1  -4    0.59    0.14 
 -17  -1   4    2.32    0.21 
  17   1  -4    2.46    0.22 
  16  -1  -4    7.21    0.26 
 -16  -1   4    7.48    0.29 
  16   1  -4    7.00    0.29 
  15  -1  -4    3.76    0.22 
 -15  -1   4    3.36    0.20 
  15  -1  -4    3.67    0.18 
 -15   1   4    4.29    0.20 
  15   1  -4    3.97    0.22 
 -15   1   4    4.23    0.20 
 -14  -1   4    4.74    0.21 
  14  -1  -4    4.41    0.19 
  14  -1  -4    4.65    0.22 
 -14   1   4    4.36    0.19 
  14   1  -4    4.38    0.22 
 -14   1   4    4.93    0.19 
  13  -1  -4   12.80    0.34 
 -13  -1   4   12.60    0.33 
  13  -1  -4   12.54    0.30 
  13   1  -4   10.33    0.33 
 -13   1   4   12.48    0.29 
 -13   1   4   12.01    0.30 
  13   1  -4   11.96    0.32 
  12  -1  -4    4.49    0.19 
  12  -1  -4    4.52    0.17 
 -12  -1   4    4.44    0.19 
  12   1  -4    3.08    0.14 
  12   1  -4    3.25    0.17 
 -12   1   4    2.85    0.15 
 -12   1   4    2.89    0.14 
 -11  -1   4    9.55    0.26 
  11  -1  -4    9.77    0.27 
 -11  -1   4    9.50    0.23 
  11  -1  -4    9.67    0.24 
 -11   1   4    9.17    0.23 
  11   1  -4    9.38    0.26 
 -11   1   4    9.03    0.24 
  11   1  -4    9.49    0.23 
 -10  -1   4    1.38    0.09 
 -10  -1   4    1.06    0.10 
  10  -1  -4    1.24    0.11 
  10  -1  -4    1.20    0.09 
 -10   1   4    1.15    0.10 
  10   1  -4    1.11    0.09 
  10   1  -4    1.13    0.11 
 -10   1   4    0.99    0.08 
   9  -1  -4    4.98    0.15 
   9  -1  -4    4.83    0.17 
  -9  -1   4    4.87    0.15 
  -9  -1   4    4.93    0.16 
  -9   1   4    5.22    0.15 
  -9   1   4    5.05    0.16 
   9   1  -4    5.26    0.18 
   9   1  -4    5.25    0.15 
   8  -1  -4   49.59    0.75 
   8  -1  -4   49.13    0.79 
  -8  -1   4   49.25    0.75 
  -8  -1   4   50.57    0.77 
   8   1  -4   56.11    0.82 
  -8   1   4   54.98    0.84 
  -8   1   4   55.21    0.81 
   8   1  -4   55.04    0.86 
  -7  -1   4   10.83    0.23 
  -7  -1   4   10.98    0.22 
   7  -1  -4   11.08    0.25 
   7  -1  -4   10.93    0.22 
  -7   1   4   10.89    0.21 
   7   1  -4   11.20    0.21 
   7   1  -4   10.59    0.24 
  -7   1   4   11.22    0.24 
  -6  -1   4   56.56    0.84 
   6  -1  -4   57.48    0.83 
   6  -1  -4   57.60    0.87 
  -6  -1   4   56.98    0.85 
  -6   1   4   52.97    0.80 
  -6   1   4   53.34    0.76 
   6   1  -4   52.92    0.81 
   6   1  -4   55.44    0.77 
   5  -1  -4   39.12    0.62 
  -5  -1   4   39.63    0.60 
  -5  -1   4   39.80    0.61 
   5  -1  -4   39.91    0.59 
  -5   1   4   35.49    0.51 
   5   1  -4   35.20    0.51 
   5   1  -4   35.29    0.56 
  -5   1   4   35.85    0.55 
   4  -1  -4    8.24    0.16 
   4  -1  -4    7.94    0.18 
  -4  -1   4    8.19    0.18 
  -4  -1   4    7.92    0.17 
   4   1  -4    3.30    0.10 
  -4   1   4    3.45    0.07 
   4   1  -4    3.33    0.08 
   3  -1  -4    4.79    0.11 
   3  -1  -4    4.87    0.13 
  -3  -1   4    4.71    0.12 
  -3   1   4    4.82    0.08 
   3   1  -4    4.83    0.12 
   3   1  -4    5.05    0.09 
   2  -1  -4  125.83    1.71 
  -2  -1   4  124.95    1.68 
   2  -1  -4  127.14    1.68 
  -2  -1   4  125.35    1.73 
  -2   1   4  123.08    1.68 
   2   1  -4  122.65    1.68 
   1  -1  -4    6.37    0.14 
  -1  -1   4    6.68    0.11 
  -1  -1   4    6.40    0.14 
   1  -1  -4    6.59    0.13 
  -1  -1   4    6.56    0.14 
   1  -1  -4    6.76    0.11 
  -1   1   4    6.37    0.13 
   1   1  -4    6.40    0.12 
   0  -1   4  158.51    2.15 
   0  -1  -4  159.74    2.15 
   0  -1  -4  154.20    2.12 
   0  -1   4  160.50    2.13 
   0   1   4  153.03    2.11 
   0   1  -4  158.01    2.09 
   0   1  -4  154.13    2.12 
   0   1   4  157.25    2.10 
   1  -1   4   27.21    0.40 
  -1  -1  -4   26.65    0.39 
  -1  -1  -4   26.54    0.41 
  -1   1  -4   23.05    0.38 
  -1   1  -4   23.95    0.33 
   1   1   4   24.10    0.35 
   1   1   4   23.28    0.38 
   2  -1   4   55.82    0.80 
  -2  -1  -4   56.88    0.79 
  -2  -1  -4   56.59    0.80 
   2  -1   4   54.33    0.80 
   2   1   4   57.87    0.86 
  -2   1  -4   58.45    0.85 
   2   1   4   59.88    0.82 
  -3  -1  -4   22.58    0.36 
   3  -1   4   22.74    0.37 
   3  -1   4   22.90    0.36 
  -3  -1  -4   22.80    0.36 
  -3   1  -4   25.74    0.42 
   3   1   4   26.30    0.44 
   3   1   4   26.44    0.37 
  -4  -1  -4    9.84    0.19 
  -4  -1  -4    9.68    0.20 
   4  -1   4    9.92    0.19 
   4  -1   4    9.82    0.21 
   4   1   4    9.01    0.14 
  -4   1  -4    9.25    0.20 
   4   1   4    9.06    0.22 
   5  -1   4    3.32    0.12 
  -5  -1  -4    3.65    0.11 
  -5  -1  -4    3.50    0.11 
   5  -1   4    3.62    0.11 
   5   1   4    2.14    0.05 
  -5   1  -4    2.13    0.09 
   6  -1   4    5.87    0.15 
  -6  -1  -4    6.37    0.11 
   6  -1   4    6.06    0.12 
  -6  -1  -4    5.91    0.15 
   6  -1   4    6.05    0.17 
  -6  -1  -4    5.66    0.16 
   6   1   4    7.75    0.22 
  -6   1  -4    7.50    0.19 
   7  -1   4    2.18    0.07 
   7  -1   4    2.25    0.11 
  -7  -1  -4    2.16    0.09 
  -7  -1  -4    2.21    0.06 
  -7  -1  -4    2.24    0.11 
   7   1   4    2.17    0.12 
  -7   1  -4    2.20    0.11 
  -7   1  -4    2.15    0.09 
  -8  -1  -4    9.99    0.17 
   8  -1   4    9.62    0.25 
  -8  -1  -4    9.54    0.24 
  -8  -1  -4    9.43    0.22 
   8  -1   4    9.91    0.19 
   8   1   4    9.58    0.27 
  -8   1  -4   10.15    0.22 
  -8   1  -4   10.00    0.24 
   9  -1   4    8.22    0.23 
  -9  -1  -4    8.35    0.23 
  -9   1  -4    8.16    0.20 
   9   1   4    8.82    0.21 
   9   1   4    8.82    0.26 
  -9   1  -4    8.02    0.22 
 -10  -1  -4    1.89    0.13 
  10  -1   4    1.67    0.12 
  10   1   4    1.61    0.14 
 -10   1  -4    1.80    0.12 
  10   1   4    1.75    0.11 
 -10   1  -4    1.52    0.10 
  11  -1   4   11.10    0.30 
 -11  -1  -4   10.52    0.29 
 -11   1  -4   12.02    0.30 
  11   1   4   12.31    0.29 
  11   1   4   12.65    0.34 
 -11   1  -4   12.50    0.28 
 -12  -1  -4   13.57    0.34 
  12  -1   4   12.78    0.34 
  12   1   4   13.29    0.31 
 -12   1  -4   12.72    0.29 
  12   1   4   13.31    0.36 
 -12   1  -4   12.48    0.33 
  13  -1   4    2.02    0.16 
 -13  -1  -4    2.10    0.17 
  13   1   4    1.04    0.12 
  13   1   4    0.89    0.13 
 -13   1  -4    0.90    0.12 
 -14  -1  -4    9.19    0.31 
  14  -1   4    9.21    0.31 
  14   1   4    9.46    0.33 
 -14   1  -4    9.23    0.30 
 -15  -1  -4    0.63    0.12 
  15  -1   4    0.79    0.13 
  15   1   4    1.17    0.15 
 -15   1  -4    0.99    0.13 
  16  -1   4   12.72    0.39 
 -16  -1  -4   13.20    0.40 
  16   1   4   12.50    0.39 
 -16   1  -4   13.06    0.38 
  17  -1   4    1.95    0.21 
 -17  -1  -4    1.27    0.17 
 -17   1  -4    1.99    0.21 
  17   1   4    1.86    0.20 
  18  -1   4    3.70    0.26 
 -18   1  -4    3.50    0.25 
  18   1   4    3.30    0.25 
  19   2  -4    3.66    0.28 
 -18  -2   4    0.86    0.15 
  18   2  -4    1.06    0.17 
  17  -2  -4    7.77    0.29 
 -17  -2   4    7.55    0.32 
 -17   2   4    7.80    0.30 
  17   2  -4    7.76    0.33 
 -16  -2   4    1.24    0.16 
  16  -2  -4    1.61    0.17 
 -16   2   4    2.53    0.20 
  16   2  -4    2.13    0.20 
 -15  -2   4    7.66    0.29 
  15  -2  -4    7.36    0.26 
  15   2  -4    7.41    0.29 
 -15   2   4    7.16    0.27 
  14  -2  -4   10.52    0.29 
 -14  -2   4   10.40    0.32 
  14   2  -4    9.20    0.31 
 -14   2   4    9.45    0.29 
  13  -2  -4    1.38    0.15 
 -13  -2   4    1.35    0.15 
  13  -2  -4    1.24    0.13 
  13   2  -4    1.54    0.16 
 -13   2   4    1.61    0.14 
  12  -2  -4    5.47    0.23 
 -12  -2   4    5.64    0.22 
  12  -2  -4    5.50    0.20 
 -12   2   4    4.80    0.20 
  12   2  -4    5.03    0.21 
  11  -2  -4    0.93    0.10 
  11  -2  -4    1.09    0.12 
 -11  -2   4    1.03    0.12 
  11   2  -4    1.81    0.14 
 -11   2   4    1.67    0.13 
  11   2  -4    1.69    0.11 
 -10  -2   4    1.16    0.12 
  10  -2  -4    1.39    0.10 
  10  -2  -4    1.33    0.12 
 -10   2   4    1.84    0.09 
 -10   2   4    1.93    0.12 
  10   2  -4    1.74    0.13 
  10   2  -4    2.15    0.11 
   9  -2  -4   11.65    0.29 
   9  -2  -4   11.60    0.27 
  -9  -2   4   11.86    0.28 
  -9  -2   4   11.74    0.26 
  -9   2   4   10.43    0.26 
  -9   2   4   11.07    0.22 
   9   2  -4   10.68    0.24 
   9   2  -4   10.79    0.27 
   8  -2  -4    2.06    0.11 
  -8  -2   4    2.24    0.12 
  -8  -2   4    2.27    0.10 
   8  -2  -4    2.27    0.13 
   8   2  -4    2.13    0.10 
  -8   2   4    2.19    0.08 
  -8   2   4    2.49    0.12 
   7  -2  -4    0.60    0.07 
  -7  -2   4    0.70    0.07 
  -7  -2   4    0.64    0.06 
   7  -2  -4    0.61    0.07 
  -7   2   4    1.06    0.09 
  -7   2   4    1.13    0.06 
   7   2  -4    1.09    0.08 
   6  -2  -4   33.08    0.56 
  -6  -2   4   33.38    0.52 
  -6  -2   4   33.19    0.55 
   6  -2  -4   32.70    0.53 
  -6   2   4   39.59    0.56 
  -6   2   4   39.56    0.63 
   6   2  -4   39.59    0.61 
   6   2  -4   38.26    0.63 
   5  -2  -4   22.66    0.41 
   5  -2  -4   22.86    0.39 
  -5  -2   4   23.29    0.38 
  -5  -2   4   22.54    0.40 
   5   2  -4   22.40    0.36 
  -5   2   4   22.19    0.31 
   5   2  -4   20.91    0.38 
  -5   2   4   21.60    0.38 
   4  -2  -4    4.94    0.14 
   4  -2  -4    4.94    0.13 
  -4  -2   4    4.82    0.14 
  -4  -2   4    5.07    0.12 
  -4   2   4    4.85    0.13 
   4   2  -4    4.74    0.12 
   4   2  -4    4.62    0.13 
   3  -2  -4   28.69    0.46 
   3  -2  -4   27.97    0.46 
  -3  -2   4   28.85    0.44 
  -3  -2   4   28.06    0.46 
   3   2  -4   28.06    0.45 
  -3   2   4   28.65    0.46 
   3   2  -4   28.73    0.43 
   2  -2  -4    0.73    0.06 
  -2  -2   4    0.62    0.05 
  -2  -2   4    0.63    0.04 
   2  -2  -4    0.73    0.06 
  -2  -2   4    0.51    0.05 
   2   2  -4    0.55    0.05 
  -2   2   4    0.59    0.05 
  -1  -2   4   58.88    0.85 
   1  -2  -4   57.58    0.85 
   1  -2  -4   58.36    0.79 
  -1  -2   4   57.67    0.84 
  -1  -2   4   59.07    0.83 
  -1   2   4   59.91    0.85 
   1   2  -4   58.75    0.84 
   0  -2   4    2.03    0.08 
   0  -2   4    2.17    0.07 
   0  -2   4    2.11    0.08 
   0  -2  -4    2.31    0.06 
   0  -2   4    2.13    0.07 
   0  -2  -4    2.22    0.08 
   0   2   4    1.27    0.07 
   0   2   4    1.24    0.06 
   1  -2   4   37.99    0.54 
   1  -2   4   37.32    0.57 
  -1  -2  -4   37.71    0.54 
   1  -2   4   37.72    0.56 
  -1  -2  -4   37.21    0.58 
  -1   2  -4   47.07    0.70 
   1   2   4   45.61    0.70 
   1   2   4   46.70    0.66 
  -2  -2  -4   11.59    0.23 
   2  -2   4   11.92    0.23 
   2  -2   4   12.33    0.19 
  -2  -2  -4   12.00    0.21 
   2  -2   4   12.05    0.23 
   2   2   4   13.72    0.22 
   2   2   4   13.08    0.26 
  -2   2  -4   13.46    0.26 
  -3  -2  -4   32.41    0.50 
   3  -2   4   33.23    0.45 
   3  -2   4   31.96    0.52 
   3  -2   4   32.29    0.51 
  -3  -2  -4   32.47    0.52 
  -3   2  -4   32.58    0.53 
   3   2   4   33.07    0.55 
   3   2   4   34.20    0.47 
   4  -2   4   30.81    0.51 
  -4  -2  -4   31.22    0.51 
  -4  -2  -4   31.03    0.49 
   4  -2   4   31.33    0.51 
  -4   2  -4   28.31    0.47 
   4   2   4   28.44    0.50 
  -5  -2  -4    2.92    0.11 
   5  -2   4    3.05    0.12 
  -5  -2  -4    2.81    0.11 
   5  -2   4    2.87    0.11 
   5   2   4    3.03    0.14 
  -5   2  -4    2.85    0.11 
   6  -2   4   16.71    0.34 
  -6  -2  -4   17.49    0.33 
  -6  -2  -4   17.21    0.33 
  -6   2  -4   17.47    0.34 
   6   2   4   17.88    0.38 
  -6   2  -4   17.04    0.33 
  -7  -2  -4   12.73    0.27 
   7  -2   4   12.59    0.28 
  -7  -2  -4   12.60    0.28 
   7   2   4   12.11    0.31 
  -7   2  -4   12.31    0.27 
  -7   2  -4   12.13    0.27 
   8  -2   4    4.50    0.17 
  -8  -2  -4    4.43    0.16 
  -8  -2  -4    4.64    0.16 
  -8   2  -4    4.22    0.15 
   8   2   4    3.98    0.18 
  -8   2  -4    4.13    0.15 
   9  -2   4    2.72    0.14 
  -9  -2  -4    2.79    0.14 
  -9  -2  -4    2.90    0.14 
  -9   2  -4    3.55    0.15 
  -9   2  -4    3.72    0.16 
   9   2   4    3.80    0.18 
 -10  -2  -4    1.03    0.12 
  10  -2   4    0.95    0.11 
  10   2   4    0.85    0.12 
 -10   2  -4    0.61    0.09 
 -10   2  -4    0.66    0.09 
  10   2   4    0.71    0.09 
 -11  -2  -4    9.28    0.28 
  11  -2   4    8.99    0.27 
  11   2   4   10.31    0.32 
 -11   2  -4   10.48    0.27 
  11   2   4   10.23    0.28 
 -11   2  -4   10.17    0.28 
 -12  -2  -4    3.79    0.20 
  12  -2   4    3.74    0.19 
  12   2   4    4.38    0.19 
 -12   2  -4    4.81    0.20 
 -12   2  -4    4.52    0.19 
  12   2   4    4.80    0.24 
  13  -2   4    8.18    0.28 
 -13  -2  -4    7.86    0.28 
  13   2   4    6.76    0.28 
 -13   2  -4    7.36    0.25 
 -13   2  -4    7.54    0.26 
  13   2   4    7.73    0.26 
  14  -2   4    2.76    0.20 
 -14  -2  -4    2.78    0.20 
  14   2   4    3.22    0.22 
 -14   2  -4    3.07    0.19 
 -14   2  -4    2.98    0.18 
  14   2   4    3.02    0.18 
 -15  -2  -4    2.88    0.22 
  15  -2   4    3.35    0.22 
  15   2   4    3.51    0.24 
 -15   2  -4    3.52    0.21 
  16  -2   4    0.12    0.10 
 -16  -2  -4    0.04    0.11 
 -16   2  -4   -0.03    0.10 
  16   2   4   -0.03    0.09 
 -17  -2  -4    1.69    0.19 
  17  -2   4    1.81    0.21 
  17   2   4    3.30    0.25 
  18   2   4    0.46    0.13 
  18  -3  -4    2.19    0.21 
 -18   3   4    2.80    0.24 
 -17  -3   4    0.61    0.14 
  17  -3  -4    0.65    0.13 
 -17   3   4    0.75    0.15 
  17   3  -4    0.71    0.15 
  16  -3  -4    4.38    0.24 
 -16  -3   4    4.89    0.27 
  16   3  -4    4.47    0.27 
 -16   3   4    3.71    0.24 
 -15  -3   4    4.15    0.24 
  15  -3  -4    4.09    0.22 
 -15   3   4    4.34    0.23 
  15   3  -4    4.25    0.25 
  14  -3  -4    2.17    0.17 
 -14  -3   4    1.92    0.19 
  14   3  -4    1.79    0.19 
 -14   3   4    1.49    0.17 
  13  -3  -4    2.07    0.16 
 -13  -3   4    2.25    0.18 
 -13   3   4    1.76    0.17 
  13   3  -4    1.80    0.18 
 -12  -3   4    3.65    0.20 
  12  -3  -4    3.96    0.19 
  12   3  -4    3.41    0.20 
 -12   3   4    3.61    0.19 
 -11  -3   4    5.88    0.23 
  11  -3  -4    6.08    0.21 
  11  -3  -4    5.83    0.22 
  11   3  -4    5.54    0.22 
 -11   3   4    5.26    0.21 
  10  -3  -4    5.15    0.19 
  10  -3  -4    5.04    0.19 
 -10  -3   4    4.83    0.20 
 -10   3   4    5.64    0.21 
  10   3  -4    5.25    0.21 
   9  -3  -4    3.04    0.14 
  -9  -3   4    2.94    0.16 
   9  -3  -4    2.97    0.15 
   9   3  -4    2.41    0.13 
  -9   3   4    2.44    0.14 
   9   3  -4    2.61    0.15 
  -8  -3   4    6.17    0.20 
   8  -3  -4    6.31    0.20 
   8  -3  -4    6.28    0.19 
   8   3  -4    5.98    0.21 
   8   3  -4    6.56    0.20 
  -8   3   4    6.53    0.20 
   7  -3  -4    5.41    0.17 
  -7  -3   4    5.10    0.13 
  -7  -3   4    5.38    0.18 
   7  -3  -4    4.85    0.17 
   7   3  -4    6.15    0.20 
   7   3  -4    6.22    0.18 
  -7   3   4    6.22    0.20 
  -6  -3   4   11.17    0.26 
   6  -3  -4   11.34    0.26 
   6  -3  -4   11.15    0.25 
  -6  -3   4   11.33    0.22 
   6   3  -4   12.28    0.28 
   6   3  -4   11.74    0.26 
  -6   3   4   11.82    0.27 
   5  -3  -4    9.51    0.23 
  -5  -3   4    9.46    0.23 
  -5  -3   4   10.10    0.20 
   5  -3  -4    9.76    0.23 
   5   3  -4    7.32    0.20 
   5   3  -4    7.60    0.19 
  -5   3   4    7.62    0.20 
  -4  -3   4   39.69    0.64 
   4  -3  -4   39.92    0.64 
   4  -3  -4   40.68    0.65 
  -4  -3   4   40.04    0.61 
   4   3  -4   38.45    0.62 
  -4   3   4   38.90    0.62 
   4   3  -4   38.92    0.60 
  -3  -3   4    0.82    0.06 
  -3  -3   4    0.86    0.07 
  -3  -3   4    0.87    0.07 
   3  -3  -4    0.88    0.07 
   3  -3  -4    0.91    0.08 
   3   3  -4    1.64    0.08 
  -3   3   4    1.75    0.09 
  -2  -3   4    5.96    0.15 
  -2  -3   4    5.89    0.15 
   2  -3  -4    6.19    0.17 
  -2  -3   4    6.10    0.16 
  -2  -3   4    6.17    0.16 
   2  -3  -4    5.88    0.17 
  -2   3   4    3.51    0.12 
   1  -3  -4    1.91    0.09 
  -1  -3   4    1.76    0.09 
   1  -3  -4    1.89    0.06 
  -1  -3   4    1.60    0.08 
  -1  -3   4    1.90    0.08 
  -1  -3   4    1.81    0.08 
  -1   3   4    1.49    0.08 
   0  -3   4   22.33    0.39 
   0  -3   4   22.86    0.37 
   0  -3   4   22.45    0.39 
   0  -3  -4   22.52    0.40 
   0  -3   4   22.50    0.40 
   0  -3  -4   22.66    0.35 
   0   3   4   23.01    0.41 
   0   3   4   22.75    0.38 
  -1  -3  -4    1.19    0.08 
   1  -3   4    1.25    0.08 
   1  -3   4    1.37    0.07 
   1  -3   4    1.19    0.08 
  -1  -3  -4    1.32    0.06 
   1   3   4    0.85    0.08 
  -1   3  -4    0.71    0.07 
   1   3   4    0.73    0.05 
   2  -3   4   28.27    0.48 
  -2  -3  -4   27.95    0.49 
  -2  -3  -4   29.17    0.46 
   2  -3   4   30.10    0.49 
   2  -3   4   29.59    0.44 
   2   3   4   30.20    0.53 
  -2   3  -4   30.73    0.52 
   2   3   4   31.34    0.46 
  -3  -3  -4   15.44    0.29 
  -3  -3  -4   15.45    0.32 
   3  -3   4   15.31    0.31 
   3  -3   4   15.91    0.26 
   3  -3   4   15.53    0.31 
  -3   3  -4   16.92    0.33 
   3   3   4   16.86    0.35 
   3   3   4   17.11    0.27 
   4  -3   4    5.24    0.11 
   4  -3   4    4.83    0.16 
  -4  -3  -4    4.95    0.14 
   4  -3   4    4.75    0.16 
  -4  -3  -4    4.72    0.16 
   4   3   4    4.87    0.17 
  -4   3  -4    5.09    0.16 
   5  -3   4    1.84    0.11 
  -5  -3  -4    1.64    0.09 
  -5  -3  -4    1.72    0.11 
   5  -3   4    1.77    0.07 
  -5   3  -4    2.44    0.12 
   5   3   4    2.33    0.13 
  -5   3  -4    2.30    0.11 
  -6  -3  -4   10.30    0.24 
  -6  -3  -4    9.82    0.25 
   6  -3   4    9.86    0.25 
  -6   3  -4   12.62    0.28 
  -6   3  -4   13.05    0.29 
   6   3   4   13.17    0.32 
   7  -3   4    0.68    0.09 
  -7  -3  -4    0.56    0.08 
  -7  -3  -4    0.78    0.08 
   7   3   4    0.49    0.09 
  -7   3  -4    0.70    0.09 
  -7   3  -4    0.61    0.08 
   8  -3   4   19.81    0.42 
  -8  -3  -4   20.11    0.41 
  -8  -3  -4   20.31    0.41 
   8   3   4   19.88    0.45 
  -8   3  -4   19.19    0.40 
  -8   3  -4   19.66    0.39 
  -9  -3  -4    6.50    0.22 
  -9  -3  -4    6.23    0.21 
   9  -3   4    5.68    0.21 
  -9   3  -4    5.26    0.18 
   9   3   4    5.56    0.23 
  -9   3  -4    4.93    0.19 
  10  -3   4    6.68    0.24 
 -10  -3  -4    6.12    0.23 
 -10  -3  -4    6.44    0.23 
  10   3   4    5.93    0.24 
 -10   3  -4    5.27    0.21 
 -10   3  -4    5.54    0.20 
 -11  -3  -4    1.68    0.16 
  11  -3   4    1.52    0.15 
 -11   3  -4    1.42    0.14 
 -11   3  -4    1.64    0.15 
  11   3   4    1.80    0.18 
  11   3   4    1.55    0.15 
  12  -3   4    3.90    0.21 
 -12  -3  -4    4.19    0.22 
  12   3   4    3.58    0.20 
  12   3   4    3.69    0.22 
 -12   3  -4    3.58    0.19 
 -12   3  -4    3.36    0.18 
 -13  -3  -4    0.53    0.11 
  13  -3   4    0.42    0.11 
  13   3   4    0.67    0.12 
  13   3   4    0.71    0.13 
 -13   3  -4    0.59    0.11 
 -14  -3  -4    1.80    0.19 
  14  -3   4    1.76    0.18 
  14   3   4    2.80    0.21 
 -14   3  -4    2.47    0.20 
  14   3   4    2.33    0.21 
  15  -3   4    1.21    0.16 
 -15  -3  -4    1.44    0.17 
  15   3   4    1.56    0.18 
 -15   3  -4    2.08    0.20 
  15   3   4    2.21    0.20 
  16  -3   4    2.61    0.23 
 -16  -3  -4    2.64    0.24 
  16   3   4    1.86    0.20 
 -16   3  -4    1.91    0.20 
  16   3   4    1.90    0.20 
  17   3   4    0.63    0.15 
  16  -4  -4    0.13    0.12 
 -16   4   4    0.32    0.13 
  16   4  -4    0.42    0.14 
  15  -4  -4    3.96    0.23 
 -15  -4   4    3.87    0.26 
 -15   4   4    3.58    0.24 
  15   4  -4    3.61    0.25 
 -14  -4   4    1.46    0.17 
  14  -4  -4    1.26    0.15 
 -14   4   4    0.93    0.14 
  14   4  -4    0.99    0.16 
 -13  -4   4    2.57    0.20 
  13  -4  -4    2.67    0.20 
  13   4  -4    2.83    0.22 
 -13   4   4    2.66    0.20 
  12  -4  -4    2.30    0.17 
 -12  -4   4    2.53    0.19 
 -12   4   4    2.85    0.19 
  12   4  -4    2.74    0.20 
 -11  -4   4    5.48    0.23 
  11  -4  -4    4.98    0.22 
  11   4  -4    5.50    0.25 
 -11   4   4    5.67    0.24 
 -10  -4   4    2.31    0.17 
  10  -4  -4    2.38    0.16 
 -10   4   4    1.96    0.16 
  10   4  -4    1.93    0.17 
   9  -4  -4    9.65    0.25 
   9  -4  -4    8.75    0.27 
  -9  -4   4    9.14    0.28 
   9   4  -4    7.84    0.26 
  -9   4   4    7.71    0.25 
   8  -4  -4    0.60    0.08 
  -8  -4   4    0.65    0.09 
   8  -4  -4    0.67    0.10 
  -8   4   4    0.48    0.09 
   8   4  -4    0.39    0.09 
   7  -4  -4    4.59    0.19 
   7  -4  -4    4.41    0.17 
  -7  -4   4    4.40    0.18 
  -7   4   4    4.93    0.19 
   7   4  -4    5.28    0.19 
   7   4  -4    5.01    0.20 
   6  -4  -4    0.49    0.07 
   6  -4  -4    0.55    0.08 
  -6  -4   4    0.35    0.07 
   6   4  -4    1.16    0.12 
  -6   4   4    1.19    0.11 
   6   4  -4    1.19    0.10 
  -5  -4   4    6.97    0.17 
  -5  -4   4    6.47    0.20 
   5  -4  -4    6.29    0.21 
   5  -4  -4    6.75    0.20 
   5   4  -4    6.44    0.19 
  -5   4   4    6.52    0.20 
   5   4  -4    5.95    0.20 
  -4  -4   4    2.45    0.13 
  -4  -4   4    2.40    0.11 
   4  -4  -4    2.63    0.13 
  -4  -4   4    2.51    0.13 
   4  -4  -4    2.43    0.13 
   4   4  -4    2.94    0.13 
  -4   4   4    3.34    0.14 
  -3  -4   4    8.39    0.20 
  -3  -4   4    8.51    0.22 
  -3  -4   4    8.25    0.22 
   3  -4  -4    8.40    0.24 
   3  -4  -4    8.45    0.22 
  -3   4   4    6.60    0.19 
   3   4  -4    7.00    0.19 
  -2  -4   4   17.70    0.34 
  -2  -4   4   18.04    0.35 
   2  -4  -4   18.11    0.37 
  -2  -4   4   18.35    0.35 
  -2  -4   4   18.00    0.36 
   2  -4  -4   17.71    0.36 
  -2   4   4   16.90    0.33 
  -1  -4   4   19.48    0.37 
   1  -4  -4   19.34    0.39 
  -1  -4   4   19.20    0.38 
   1  -4  -4   19.61    0.40 
  -1  -4   4   19.71    0.36 
  -1  -4   4   19.87    0.37 
  -1   4   4   19.71    0.36 
   0  -4   4    1.77    0.11 
   0  -4  -4    1.88    0.12 
   0  -4   4    1.79    0.10 
   0  -4   4    1.63    0.09 
   0  -4   4    1.58    0.10 
   0  -4  -4    1.86    0.08 
   0   4   4    1.18    0.08 
  -1  -4  -4   11.87    0.28 
   1  -4   4   11.80    0.27 
   1  -4   4   12.31    0.25 
   1  -4   4   11.58    0.27 
  -1  -4  -4   12.12    0.23 
   1   4   4   13.20    0.25 
   1   4   4   12.86    0.30 
  -1   4  -4   12.74    0.28 
  -2  -4  -4   16.69    0.31 
  -2  -4  -4   16.26    0.35 
   2  -4   4   16.77    0.35 
   2  -4   4   17.05    0.31 
   2  -4   4   16.84    0.35 
   2   4   4   15.65    0.28 
  -2   4  -4   15.88    0.33 
   2   4   4   15.79    0.35 
  -3  -4  -4   10.20    0.22 
  -3  -4  -4    9.48    0.26 
   3  -4   4    9.88    0.25 
   3  -4   4   10.00    0.21 
   3  -4   4    9.73    0.25 
   3   4   4    9.12    0.26 
  -3   4  -4    9.53    0.24 
  -4  -4  -4    2.72    0.14 
   4  -4   4    3.32    0.15 
  -4  -4  -4    3.36    0.13 
  -4   4  -4    3.14    0.14 
   4   4   4    3.17    0.16 
  -4   4  -4    3.38    0.15 
  -5  -4  -4   14.84    0.35 
  -5  -4  -4   14.92    0.32 
   5  -4   4   14.92    0.34 
  -5   4  -4   15.82    0.34 
  -5   4  -4   15.66    0.35 
   5   4   4   15.70    0.38 
  -6  -4  -4   14.16    0.32 
  -6  -4  -4   13.93    0.34 
   6  -4   4   14.21    0.34 
  -6   4  -4   12.63    0.31 
  -6   4  -4   13.17    0.30 
   6   4   4   12.64    0.34 
  -7  -4  -4    4.52    0.20 
   7  -4   4    4.55    0.20 
  -7  -4  -4    4.53    0.18 
  -7   4  -4    4.46    0.19 
  -7   4  -4    4.07    0.17 
   7   4   4    4.57    0.21 
  -8  -4  -4    3.34    0.17 
   8  -4   4    3.62    0.18 
  -8  -4  -4    3.71    0.18 
   8   4   4    3.69    0.20 
  -8   4  -4    3.60    0.18 
  -9  -4  -4    9.95    0.30 
   9  -4   4    9.69    0.30 
  -9  -4  -4    9.86    0.29 
   9   4   4   11.04    0.34 
  -9   4  -4   11.13    0.32 
  10  -4   4    1.92    0.17 
 -10  -4  -4    2.17    0.18 
 -10  -4  -4    1.83    0.16 
 -10   4  -4    1.88    0.17 
  10   4   4    1.51    0.17 
 -11  -4  -4    4.07    0.22 
 -11  -4  -4    3.67    0.20 
  11  -4   4    3.84    0.22 
  11   4   4    4.01    0.23 
 -11   4  -4    3.45    0.21 
 -12  -4  -4    0.31    0.10 
  12  -4   4    0.37    0.11 
 -12   4  -4    0.64    0.13 
  12   4   4    0.34    0.11 
  12   4   4    0.37    0.11 
 -13  -4  -4    2.86    0.21 
  13  -4   4    3.19    0.22 
  13   4   4    3.01    0.24 
  13   4   4    2.90    0.22 
 -13   4  -4    2.98    0.22 
 -14  -4  -4    0.00    0.10 
  14  -4   4    0.31    0.12 
  14   4   4    0.16    0.12 
 -14   4  -4    0.11    0.11 
  14   4   4    0.16    0.12 
 -15  -4  -4    2.58    0.23 
  15  -4   4    2.41    0.25 
  15   4   4    1.70    0.20 
  15   4   4    1.75    0.19 
 -15   4  -4    1.95    0.21 
  16   4   4    0.48    0.14 
 -16   4  -4    0.59    0.17 
 -14  -5   4    1.69    0.20 
  14  -5  -4    1.79    0.19 
  14   5  -4    1.58    0.20 
 -14   5   4    1.67    0.19 
 -13  -5   4    0.33    0.13 
  13  -5  -4    0.37    0.12 
 -13   5   4    0.54    0.14 
  13   5  -4    0.38    0.13 
 -12  -5   4    4.54    0.25 
  12  -5  -4    3.94    0.24 
 -12   5   4    3.86    0.24 
  12   5  -4    3.85    0.25 
 -11  -5   4    2.36    0.20 
  11  -5  -4    2.29    0.20 
  11   5  -4    2.21    0.21 
 -11   5   4    2.04    0.20 
  10  -5  -4    4.24    0.23 
 -10  -5   4    4.32    0.23 
  10   5  -4    4.25    0.24 
 -10   5   4    4.65    0.24 
   9  -5  -4    0.37    0.10 
  -9  -5   4    0.15    0.09 
  -9   5   4    0.05    0.09 
   9   5  -4    0.17    0.10 
  -8  -5   4    8.27    0.28 
   8  -5  -4    8.65    0.29 
   8   5  -4   10.35    0.32 
  -8   5   4   10.26    0.31 
  -7  -5   4    2.75    0.17 
   7  -5  -4    2.81    0.16 
   7  -5  -4    2.88    0.18 
   7   5  -4    2.50    0.18 
  -7   5   4    2.27    0.16 
   6  -5  -4    4.26    0.20 
   6  -5  -4    4.24    0.18 
  -6  -5   4    4.18    0.19 
  -6   5   4    4.43    0.20 
   6   5  -4    4.08    0.20 
  -5  -5   4    6.54    0.23 
  -5  -5   4    7.06    0.23 
   5  -5  -4    6.81    0.24 
   5  -5  -4    6.95    0.22 
   5   5  -4    6.98    0.23 
  -5   5   4    7.20    0.24 
   4  -5  -4    2.24    0.16 
   4  -5  -4    2.43    0.15 
  -4  -5   4    2.51    0.15 
  -4  -5   4    2.36    0.14 
   4   5  -4    2.76    0.15 
  -4   5   4    2.63    0.15 
  -3  -5   4    3.74    0.17 
  -3  -5   4    4.05    0.16 
  -3  -5   4    3.66    0.16 
   3  -5  -4    3.68    0.19 
   3  -5  -4    4.08    0.17 
   3   5  -4    4.20    0.18 
  -3   5   4    4.10    0.17 
  -2  -5   4    1.36    0.11 
  -2  -5   4    1.36    0.11 
   2  -5  -4    1.31    0.14 
  -2  -5   4    1.22    0.12 
  -2  -5   4    1.23    0.12 
   2  -5  -4    1.33    0.12 
  -2   5   4    0.62    0.08 
  -1  -5   4    0.39    0.07 
   1  -5  -4    0.35    0.09 
  -1  -5   4    0.44    0.07 
   1  -5  -4    0.26    0.08 
  -1  -5   4    0.32    0.07 
  -1  -5   4    0.37    0.08 
  -1   5   4    0.39    0.07 
   0  -5   4   19.04    0.38 
   0  -5   4   19.15    0.40 
   0  -5   4   19.13    0.39 
   0  -5  -4   19.05    0.41 
   0   5   4   17.99    0.41 
   0   5  -4   18.61    0.39 
   0   5  -4   18.17    0.38 
   0   5   4   18.28    0.36 
  -1  -5  -4    2.64    0.15 
   1  -5   4    2.63    0.15 
   1  -5   4    2.48    0.12 
  -1   5  -4    3.51    0.16 
  -1   5  -4    3.54    0.16 
   1   5   4    3.69    0.19 
  -2  -5  -4    9.56    0.28 
   2  -5   4    9.05    0.27 
  -2   5  -4   12.45    0.30 
  -2   5  -4   11.52    0.31 
   2   5   4   12.27    0.33 
   3  -5   4   13.47    0.33 
  -3  -5  -4   13.36    0.34 
   3   5   4   12.80    0.35 
  -3   5  -4   12.60    0.32 
  -4  -5  -4   13.59    0.44 
   4  -5   4   14.66    0.36 
  -4  -5  -4   13.25    0.35 
   4   5   4   11.17    0.33 
  -4   5  -4   11.58    0.30 
   5  -5   4    6.86    0.24 
  -5  -5  -4    6.83    0.22 
  -5  -5  -4    6.75    0.25 
   5   5   4    8.02    0.28 
  -5   5  -4    7.49    0.25 
   6  -5   4   13.01    0.36 
  -6  -5  -4   13.54    0.32 
  -6  -5  -4   12.72    0.35 
   6   5   4   13.83    0.38 
  -6   5  -4   14.59    0.37 
  -7  -5  -4    0.78    0.12 
   7  -5   4    0.74    0.12 
  -7  -5  -4    0.59    0.09 
  -7   5  -4    0.89    0.13 
   7   5   4    0.96    0.13 
  -8  -5  -4    4.79    0.23 
  -8  -5  -4    4.72    0.21 
   8  -5   4    4.68    0.23 
  -8   5  -4    4.90    0.24 
   8   5   4    5.11    0.26 
  -9  -5  -4    0.10    0.08 
   9  -5   4    0.13    0.10 
  -9  -5  -4    0.15    0.10 
  -9   5  -4    0.01    0.09 
   9   5   4    0.07    0.10 
 -10  -5  -4    5.37    0.26 
 -10  -5  -4    4.71    0.24 
  10  -5   4    5.40    0.26 
 -10   5  -4    4.82    0.24 
  10   5   4    4.16    0.25 
 -11  -5  -4    0.55    0.13 
  11  -5   4    0.55    0.13 
 -11  -5  -4    0.71    0.13 
  11   5   4    0.37    0.13 
 -11   5  -4    0.38    0.12 
  12  -5   4    1.98    0.21 
 -12  -5  -4    1.52    0.17 
  12   5   4    2.35    0.23 
 -12   5  -4    1.54    0.17 
  12   5   4    2.23    0.22 
 -13  -5  -4    0.07    0.11 
  13  -5   4    0.02    0.11 
  13   5   4    0.16    0.12 
 -13   5  -4    0.24    0.13 
  13   5   4    0.10    0.12 
 -12  -6   4    0.39    0.13 
 -11  -6   4    4.20    0.25 
  11  -6  -4    4.11    0.25 
  11   6  -4    4.11    0.28 
 -11   6   4    4.07    0.25 
  10  -6  -4    1.03    0.16 
 -10  -6   4    0.64    0.13 
 -10   6   4    0.84    0.15 
  10   6  -4    0.95    0.15 
  -9  -6   4    2.43    0.20 
   9  -6  -4    2.42    0.21 
  -9   6   4    2.33    0.20 
   9   6  -4    1.88    0.21 
  -8  -6   4    1.33    0.15 
   8  -6  -4    0.89    0.14 
  -8   6   4    1.18    0.15 
   8   6  -4    1.05    0.15 
  -7  -6   4    3.58    0.21 
   7  -6  -4    3.64    0.22 
   7   6  -4    2.87    0.21 
  -7   6   4    3.32    0.21 
   6  -6  -4    0.49    0.12 
  -6  -6   4    0.70    0.11 
  -6   6   4    1.10    0.14 
   6   6  -4    1.05    0.14 
   5  -6  -4    4.69    0.23 
   5  -6  -4    4.51    0.21 
  -5  -6   4    4.53    0.22 
  -5  -6   4    4.06    0.21 
   5   6  -4    3.87    0.21 
  -5   6   4    4.67    0.21 
   4  -6  -4    2.45    0.17 
  -4  -6   4    2.59    0.18 
  -4  -6   4    2.68    0.18 
   4  -6  -4    2.66    0.20 
  -4   6   4    3.24    0.19 
   3  -6  -4    0.14    0.10 
  -3  -6   4    0.27    0.09 
  -3  -6   4    0.27    0.08 
   3  -6  -4    0.19    0.09 
   3   6  -4    0.11    0.08 
  -3   6   4    0.20    0.08 
   2  -6  -4    1.37    0.15 
  -2  -6   4    1.67    0.14 
   2  -6  -4    1.97    0.17 
   2   6  -4    1.37    0.15 
  -2   6   4    1.39    0.13 
   1  -6  -4    1.52    0.15 
  -1  -6   4    1.51    0.15 
  -1  -6   4    1.40    0.14 
  -1   6   4    1.86    0.17 
   1   6  -4    2.07    0.15 
   0  -6   4    2.10    0.16 
   0  -6   4    2.37    0.18 
   0  -6  -4    2.19    0.17 
   0   6  -4    2.53    0.16 
   0   6   4    2.32    0.18 
  -1  -6  -4    3.66    0.21 
   1  -6   4    3.52    0.20 
   1   6   4    2.91    0.20 
  -1   6  -4    3.08    0.18 
   2  -6   4    3.66    0.20 
  -2  -6  -4    3.94    0.22 
   2   6   4    2.96    0.20 
  -2   6  -4    2.80    0.18 
  -3  -6  -4    8.09    0.28 
   3  -6   4    7.76    0.28 
   3   6   4    9.11    0.32 
  -3   6  -4    9.56    0.30 
  -4  -6  -4    2.18    0.19 
   4  -6   4    2.24    0.18 
  -4   6  -4    2.40    0.18 
   4   6   4    2.50    0.20 
  -5  -6  -4    1.12    0.14 
   5  -6   4    0.89    0.14 
  -5   6  -4    0.75    0.13 
   5   6   4    0.66    0.13 
   6  -6   4    1.15    0.15 
  -6  -6  -4    1.04    0.15 
   6   6   4    1.41    0.16 
  -6   6  -4    1.48    0.17 
  -7  -6  -4    7.23    0.29 
   7  -6   4    8.18    0.31 
   7   6   4    5.95    0.29 
  -7   6  -4    6.66    0.28 
   8  -6   4    1.97    0.20 
  -8  -6  -4    2.56    0.22 
   8   6   4    2.65    0.23 
  -8   6  -4    2.45    0.21 
  -9  -6  -4    6.57    0.30 
   9  -6   4    6.61    0.30 
  -9   6  -4    8.19    0.32 
   9   6   4    8.23    0.36 
  10  -6   4    0.79    0.16 
 -10  -6  -4    0.74    0.15 
 -10   6  -4    0.82    0.15 
  10   6   4    1.02    0.17 
 -11  -6  -4    0.72    0.15 
  11   6   4    0.49    0.15 
 -12  -6  -4    0.25    0.12 
  12   6   4    0.33    0.18 
  -8   7   4    4.19    0.27 
   8   7  -4    3.67    0.28 
   7  -7  -4    0.78    0.20 
  -7   7   4    0.63    0.14 
   7   7  -4    0.72    0.15 
   6  -7  -4    2.60    0.23 
   6   7  -4    2.21    0.22 
  -6   7   4    2.16    0.20 
   5  -7  -4    2.41    0.24 
   5   7  -4    1.91    0.20 
  -5   7   4    1.96    0.19 
   4  -7  -4    4.87    0.28 
  -4  -7   4    4.53    0.24 
   4   7  -4    4.31    0.24 
  -4   7   4    3.44    0.21 
   3  -7  -4    0.52    0.13 
  -3  -7   4    0.57    0.12 
   3  -7  -4    0.44    0.11 
   2  -7  -4    1.78    0.18 
  -2   7   4    2.44    0.22 
   1  -7  -4    0.03    0.10 
   1   7  -4    0.05    0.10 
  -1   7   4    0.04    0.10 
   0  -7  -4    0.85    0.14 
   0  -7   4    0.70    0.13 
   0   7   4    0.56    0.13 
  -1  -7  -4    1.27    0.16 
   1  -7   4    1.35    0.16 
   1   7   4    1.76    0.20 
  -1   7  -4    1.02    0.15 
  -2  -7  -4    1.66    0.19 
   2  -7   4    1.73    0.19 
   2   7   4    1.76    0.20 
  -2   7  -4    1.84    0.19 
  -3  -7  -4    0.83    0.15 
   3  -7   4    1.02    0.15 
  -3   7  -4    0.92    0.15 
   3   7   4    0.94    0.16 
  -4  -7  -4    3.26    0.24 
   4  -7   4    3.87    0.25 
  -4   7  -4    3.80    0.23 
   4   7   4    3.77    0.26 
   5  -7   4    1.81    0.21 
  -5  -7  -4    1.71    0.19 
   5   7   4    1.59    0.19 
  -5   7  -4    1.85    0.21 
   6  -7   4    9.71    0.37 
  -6  -7  -4    9.38    0.37 
   6   7   4    6.86    0.33 
  -6   7  -4    7.38    0.31 
   7  -7   4    0.39    0.17 
   7   7   4    0.21    0.13 
   8   7   4    2.74    0.30 
 -18   0   5    0.15    0.11 
 -17   0   5    2.49    0.20 
  17   0  -5    2.26    0.21 
  16   0  -5    0.10    0.09 
 -16   0   5    0.10    0.09 
 -15   0   5    0.42    0.10 
  15   0  -5    0.39    0.10 
  14   0  -5    4.26    0.21 
 -14   0   5    3.66    0.17 
 -14   0   5    3.76    0.18 
  13   0  -5    1.11    0.11 
  13   0  -5    1.34    0.13 
 -13   0   5    1.14    0.11 
 -13   0   5    1.33    0.13 
 -12   0   5   14.21    0.32 
  12   0  -5   14.41    0.35 
  12   0  -5   14.87    0.30 
 -12   0   5   14.32    0.32 
 -11   0   5   22.10    0.42 
  11   0  -5   21.95    0.45 
 -11   0   5   21.85    0.42 
  11   0  -5   22.58    0.40 
 -10   0   5    1.77    0.11 
  10   0  -5    1.86    0.09 
  10   0  -5    1.75    0.12 
 -10   0   5    1.79    0.10 
  -9   0   5    0.18    0.05 
  -9   0   5    0.13    0.05 
   9   0  -5    0.19    0.05 
   9   0  -5    0.20    0.04 
  -8   0   5   75.89    1.09 
   8   0  -5   73.40    1.12 
   8   0  -5   75.21    1.06 
  -8   0   5   74.68    1.10 
  -7   0   5   81.98    1.16 
   7   0  -5   79.62    1.19 
  -7   0   5   80.45    1.17 
   7   0  -5   83.24    1.14 
  -6   0   5    8.97    0.18 
   6   0  -5    8.71    0.20 
  -6   0   5    8.59    0.19 
   6   0  -5    9.02    0.16 
   5   0  -5  103.59    1.49 
  -5   0   5  105.50    1.45 
  -5   0   5  106.04    1.47 
   5   0  -5  104.97    1.43 
  -4   0   5   39.52    0.60 
   4   0  -5   39.89    0.55 
   4   0  -5   40.07    0.61 
  -4   0   5   40.21    0.58 
  -3   0   5   10.33    0.18 
   3   0  -5   10.34    0.16 
  -3   0   5   10.08    0.20 
  -2   0   5    1.04    0.05 
  -2   0   5    1.16    0.03 
   1   0  -5    0.03    0.02 
   1   0  -5    0.03    0.02 
  -1   0   5    0.15    0.02 
  -1   0   5    0.06    0.03 
   0   0   5    4.01    0.09 
   0   0   5    4.01    0.11 
   0   0  -5    4.07    0.10 
   0   0  -5    4.11    0.10 
  -1   0  -5    1.32    0.06 
   1   0   5    1.28    0.05 
  -1   0  -5    1.30    0.05 
   1   0   5    1.17    0.06 
  -2   0  -5   25.41    0.37 
   2   0   5   25.08    0.41 
  -2   0  -5   25.94    0.41 
   2   0   5   25.98    0.39 
  -3   0  -5    6.64    0.15 
   3   0   5    6.48    0.16 
  -3   0  -5    6.87    0.12 
   3   0   5    6.86    0.13 
  -4   0  -5   64.35    0.94 
   4   0   5   65.46    0.90 
   4   0   5   62.11    0.95 
  -4   0  -5   64.17    0.89 
   5   0   5    0.14    0.04 
   5   0   5    0.19    0.03 
  -5   0  -5    0.09    0.04 
  -5   0  -5    0.17    0.03 
  -6   0  -5  111.26    1.59 
   6   0   5  111.87    1.54 
   6   0   5  111.18    1.62 
  -6   0  -5  113.51    1.54 
   7   0   5   12.08    0.22 
  -7   0  -5   11.79    0.22 
  -7   0  -5   11.31    0.26 
   7   0   5   11.31    0.28 
  -8   0  -5   38.80    0.58 
  -8   0  -5   37.12    0.63 
   8   0   5   36.83    0.66 
   8   0   5   38.70    0.58 
   9   0   5    1.37    0.08 
  -9   0  -5    1.50    0.08 
  -9   0  -5    1.37    0.11 
  10   0   5    1.99    0.10 
 -10   0  -5    1.84    0.13 
  10   0   5    1.89    0.14 
 -10   0  -5    1.89    0.09 
  11   0   5    0.84    0.11 
 -11   0  -5    0.76    0.10 
  12   0   5    0.12    0.07 
 -12   0  -5    0.07    0.07 
  13   0   5    0.23    0.09 
 -13   0  -5    0.03    0.08 
  14   0   5    0.11    0.09 
 -14   0  -5    0.42    0.10 
 -15   0  -5    0.32    0.11 
  15   0   5    0.38    0.12 
  16   0   5    0.86    0.15 
 -16   0  -5    0.92    0.15 
  17   0   5    3.40    0.24 
 -17   0  -5    2.90    0.24 
 -18   0  -5    1.72    0.26 
  18   0   5    2.32    0.23 
 -19  -1   5   -0.07    0.11 
 -18  -1   5    1.46    0.17 
  18   1  -5    1.20    0.17 
 -17  -1   5    2.29    0.20 
  17   1  -5    2.34    0.22 
 -16  -1   5    0.18    0.10 
  16   1  -5    0.13    0.10 
  15  -1  -5    0.29    0.10 
  15  -1  -5    0.51    0.09 
 -15  -1   5    0.38    0.10 
  15   1  -5    0.72    0.12 
 -15   1   5    0.57    0.10 
  14  -1  -5    0.75    0.12 
 -14  -1   5    0.74    0.11 
  14  -1  -5    0.59    0.09 
 -14   1   5    0.81    0.10 
 -14   1   5    1.04    0.11 
  14   1  -5    0.84    0.12 
  13  -1  -5    2.63    0.17 
  13  -1  -5    2.64    0.14 
 -13  -1   5    2.16    0.16 
 -13   1   5    1.36    0.13 
 -13   1   5    1.45    0.12 
  13   1  -5    1.48    0.15 
  12  -1  -5    0.19    0.08 
  12  -1  -5    0.25    0.06 
 -12  -1   5    0.18    0.07 
 -12  -1   5    0.34    0.06 
 -12   1   5    0.13    0.06 
 -12   1   5    0.06    0.06 
  12   1  -5    0.09    0.07 
  11  -1  -5   28.73    0.50 
  11  -1  -5   29.51    0.56 
 -11  -1   5   28.73    0.51 
 -11  -1   5   29.44    0.53 
 -11   1   5   30.94    0.53 
  11   1  -5   32.34    0.53 
 -11   1   5   31.73    0.56 
  11   1  -5   30.74    0.58 
  10  -1  -5    3.26    0.15 
 -10  -1   5    3.06    0.13 
  10  -1  -5    3.04    0.12 
 -10  -1   5    3.02    0.14 
  10   1  -5    3.37    0.16 
  10   1  -5    3.83    0.13 
 -10   1   5    3.48    0.13 
 -10   1   5    3.51    0.15 
  -9  -1   5   40.58    0.65 
   9  -1  -5   40.92    0.64 
   9  -1  -5   40.03    0.69 
  -9  -1   5   40.96    0.66 
   9   1  -5   41.40    0.63 
   9   1  -5   41.08    0.69 
  -9   1   5   40.80    0.67 
  -9   1   5   41.41    0.63 
  -8  -1   5   66.81    1.01 
  -8  -1   5   68.32    1.01 
   8  -1  -5   68.12    1.04 
   8  -1  -5   68.09    0.99 
   8   1  -5   73.46    1.04 
  -8   1   5   73.09    1.04 
  -8   1   5   72.25    1.08 
   8   1  -5   72.06    1.10 
  -7  -1   5   21.63    0.38 
   7  -1  -5   21.63    0.36 
   7  -1  -5   21.24    0.41 
  -7  -1   5   21.94    0.38 
   7   1  -5   18.72    0.30 
  -7   1   5   18.15    0.34 
   7   1  -5   17.93    0.35 
  -7   1   5   18.37    0.30 
  -6  -1   5   28.67    0.47 
   6  -1  -5   28.83    0.49 
   6  -1  -5   28.60    0.44 
  -6  -1   5   27.40    0.46 
  -6   1   5   23.81    0.41 
   6   1  -5   24.22    0.42 
   6   1  -5   24.86    0.37 
  -6   1   5   24.39    0.37 
   5  -1  -5    4.84    0.11 
  -5  -1   5    4.74    0.13 
   5  -1  -5    4.66    0.14 
  -5  -1   5    4.81    0.14 
  -5   1   5    5.61    0.15 
   5   1  -5    5.71    0.11 
  -5   1   5    5.67    0.11 
   5   1  -5    5.66    0.15 
  -4  -1   5   16.37    0.29 
   4  -1  -5   16.30    0.27 
   4  -1  -5   15.98    0.31 
  -4  -1   5   16.80    0.30 
  -4   1   5   18.47    0.27 
   4   1  -5   18.36    0.26 
   4   1  -5   17.96    0.32 
  -4   1   5   18.03    0.32 
   3  -1  -5    5.43    0.15 
  -3  -1   5    5.50    0.14 
   3  -1  -5    5.88    0.12 
  -3  -1   5    5.83    0.13 
   3   1  -5    5.57    0.13 
  -3   1   5    5.78    0.14 
  -3   1   5    5.77    0.10 
  -2  -1   5    9.02    0.19 
  -2  -1   5    9.03    0.14 
   2  -1  -5    9.08    0.15 
   2  -1  -5    8.99    0.19 
   2  -1  -5    9.28    0.17 
   2   1  -5    8.68    0.17 
  -2   1   5    8.40    0.17 
   1  -1  -5   12.41    0.23 
  -1  -1   5   12.30    0.23 
  -1  -1   5   12.09    0.22 
  -1  -1   5   12.52    0.19 
   1  -1  -5   12.57    0.20 
  -1   1   5   12.19    0.21 
  -1   1   5   12.23    0.22 
   1   1  -5   12.84    0.21 
   0  -1  -5    4.33    0.11 
   0  -1  -5    4.35    0.09 
   0  -1   5    4.42    0.09 
   0   1   5    4.44    0.11 
   0   1  -5    4.69    0.12 
   0   1  -5    4.64    0.10 
   0   1   5    4.29    0.10 
   1  -1   5    7.72    0.15 
  -1  -1  -5    7.59    0.16 
  -1  -1  -5    7.61    0.15 
   1  -1   5    7.60    0.16 
  -1   1  -5    8.17    0.14 
   1   1   5    8.41    0.16 
  -1   1  -5    8.03    0.18 
   1   1   5    8.15    0.17 
   2  -1   5    6.67    0.15 
  -2  -1  -5    6.86    0.14 
  -2  -1  -5    6.72    0.14 
   2  -1   5    6.68    0.15 
  -2   1  -5    6.23    0.15 
   2   1   5    6.31    0.13 
   2   1   5    5.93    0.15 
   3  -1   5   19.30    0.32 
  -3  -1  -5   18.77    0.32 
   3  -1   5   18.82    0.33 
  -3  -1  -5   18.75    0.31 
   3   1   5   19.17    0.29 
  -3   1  -5   19.01    0.34 
   4  -1   5    7.65    0.17 
  -4  -1  -5    7.79    0.16 
  -4  -1  -5    7.56    0.17 
   4  -1   5    7.37    0.18 
  -4   1  -5    6.35    0.16 
   4   1   5    6.34    0.18 
   4   1   5    6.30    0.11 
   5  -1   5   34.44    0.54 
   5  -1   5   34.76    0.57 
  -5  -1  -5   34.88    0.53 
  -5  -1  -5   34.20    0.55 
   5   1   5   35.45    0.61 
  -5   1  -5   36.20    0.58 
   5   1   5   36.34    0.51 
  -6  -1  -5    3.76    0.13 
   6  -1   5    3.79    0.12 
   6  -1   5    3.82    0.14 
  -6  -1  -5    3.83    0.12 
  -6   1  -5    4.08    0.14 
   6   1   5    4.42    0.09 
   6   1   5    4.44    0.17 
   7  -1   5   37.81    0.64 
  -7  -1  -5   37.77    0.63 
   7  -1   5   38.90    0.55 
  -7  -1  -5   37.36    0.59 
  -7  -1  -5   39.04    0.54 
   7   1   5   38.31    0.67 
  -7   1  -5   37.49    0.62 
  -7   1  -5   37.68    0.59 
   8  -1   5   10.25    0.22 
  -8  -1  -5   10.62    0.19 
  -8  -1  -5   10.19    0.25 
  -8  -1  -5   10.29    0.23 
   8  -1   5   11.03    0.27 
   8   1   5    7.94    0.25 
  -8   1  -5    8.38    0.20 
  -8   1  -5    8.07    0.22 
  -9  -1  -5   20.61    0.41 
   9  -1   5   20.43    0.42 
  -9   1  -5   19.89    0.40 
   9   1   5   20.26    0.37 
  -9   1  -5   20.36    0.37 
   9   1   5   20.27    0.44 
 -10  -1  -5   26.24    0.50 
  10  -1   5   26.22    0.52 
 -10   1  -5   26.18    0.50 
 -10   1  -5   26.95    0.47 
  10   1   5   26.31    0.47 
  10   1   5   26.01    0.54 
 -11  -1  -5    5.93    0.22 
  11  -1   5    6.59    0.23 
  11   1   5    5.71    0.24 
 -11   1  -5    6.26    0.19 
 -11   1  -5    5.77    0.21 
  11   1   5    5.89    0.19 
 -12  -1  -5   21.27    0.46 
  12  -1   5   20.77    0.46 
  12   1   5   21.24    0.43 
 -12   1  -5   21.10    0.46 
  12   1   5   21.87    0.50 
 -12   1  -5   22.56    0.42 
  13  -1   5    0.11    0.08 
 -13  -1  -5    0.11    0.09 
 -13   1  -5    0.10    0.08 
  13   1   5    0.03    0.09 
  14  -1   5    0.82    0.13 
 -14  -1  -5    1.10    0.14 
  14   1   5    0.65    0.12 
 -14   1  -5    0.88    0.13 
 -15  -1  -5    3.19    0.22 
  15  -1   5    3.10    0.21 
  15   1   5    3.24    0.22 
 -15   1  -5    2.77    0.21 
  16  -1   5    1.39    0.17 
 -16  -1  -5    1.27    0.16 
 -16   1  -5    1.52    0.17 
  16   1   5    1.72    0.19 
  17  -1   5    0.51    0.14 
 -17  -1  -5    0.52    0.14 
 -17   1  -5    0.19    0.12 
  17   1   5    0.46    0.13 
 -18   1  -5    2.03    0.23 
  18   1   5    2.10    0.23 
  19   2  -5    1.44    0.21 
 -18  -2   5    0.33    0.13 
  18   2  -5    0.60    0.14 
 -17  -2   5    2.11    0.22 
 -17   2   5    2.52    0.21 
  17   2  -5    2.25    0.22 
 -16  -2   5    0.25    0.11 
  16  -2  -5    0.06    0.09 
 -16   2   5    0.02    0.09 
  16   2  -5    0.08    0.10 
  15  -2  -5    2.01    0.16 
 -15  -2   5    1.86    0.18 
 -15   2   5    2.24    0.18 
  15   2  -5    2.17    0.20 
  14  -2  -5    0.63    0.10 
  14  -2  -5    0.84    0.16 
 -14  -2   5    0.79    0.12 
 -14   2   5    0.93    0.12 
  14   2  -5    0.76    0.12 
  13  -2  -5    5.13    0.20 
 -13  -2   5    4.76    0.22 
  13  -2  -5    4.79    0.23 
 -13   2   5    4.13    0.20 
  13   2  -5    3.96    0.20 
 -12  -2   5   15.69    0.37 
  12  -2  -5   16.05    0.40 
  12  -2  -5   15.85    0.35 
  12   2  -5   13.11    0.35 
 -12   2   5   13.38    0.33 
  11  -2  -5    4.38    0.20 
 -11  -2   5    4.20    0.18 
  11  -2  -5    4.42    0.17 
  11   2  -5    3.33    0.18 
 -11   2   5    3.40    0.17 
  10  -2  -5    7.03    0.20 
 -10  -2   5    6.97    0.21 
 -10  -2   5    6.55    0.22 
  10  -2  -5    7.22    0.24 
 -10   2   5    5.69    0.20 
  10   2  -5    5.38    0.20 
   9  -2  -5    9.61    0.27 
  -9  -2   5    9.62    0.25 
  -9  -2   5    9.82    0.24 
   9  -2  -5    9.61    0.23 
  -9   2   5   12.14    0.25 
  -9   2   5   12.46    0.29 
   9   2  -5   12.72    0.26 
   9   2  -5   13.28    0.31 
   8  -2  -5   12.17    0.30 
  -8  -2   5   12.48    0.28 
   8  -2  -5   12.21    0.26 
  -8  -2   5   12.53    0.27 
  -8   2   5   11.98    0.28 
   8   2  -5   12.11    0.24 
   8   2  -5   11.74    0.28 
  -8   2   5   12.15    0.22 
   7  -2  -5   33.10    0.54 
  -7  -2   5   33.83    0.56 
   7  -2  -5   33.33    0.59 
  -7  -2   5   33.64    0.55 
   7   2  -5   30.32    0.53 
  -7   2   5   29.54    0.52 
   7   2  -5   30.55    0.48 
  -7   2   5   30.58    0.45 
   6  -2  -5    5.95    0.18 
  -6  -2   5    5.94    0.17 
  -6  -2   5    6.13    0.16 
   6  -2  -5    6.07    0.16 
  -6   2   5    8.35    0.14 
   6   2  -5    8.16    0.21 
   6   2  -5    8.35    0.18 
  -6   2   5    8.41    0.21 
  -5  -2   5   32.53    0.54 
   5  -2  -5   32.92    0.52 
  -5  -2   5   33.65    0.53 
   5  -2  -5   32.53    0.55 
   5   2  -5   31.85    0.48 
  -5   2   5   31.46    0.52 
   5   2  -5   30.75    0.52 
   4  -2  -5    7.68    0.19 
   4  -2  -5    7.97    0.18 
  -4  -2   5    8.23    0.19 
  -4  -2   5    8.35    0.18 
   4   2  -5    8.15    0.16 
   4   2  -5    7.90    0.18 
  -4   2   5    7.84    0.19 
   3  -2  -5   10.38    0.22 
  -3  -2   5    9.78    0.21 
   3  -2  -5    9.98    0.21 
  -3  -2   5   10.06    0.20 
   3   2  -5   11.88    0.20 
   3   2  -5   11.70    0.23 
  -3   2   5   11.29    0.23 
   2  -2  -5   11.56    0.24 
  -2  -2   5   12.05    0.23 
  -2  -2   5   12.05    0.20 
  -2  -2   5   12.10    0.24 
   2  -2  -5   11.98    0.23 
   2   2  -5   11.80    0.22 
  -2   2   5   12.01    0.23 
   1  -2  -5   11.31    0.22 
   1  -2  -5   11.22    0.23 
   1  -2  -5   11.38    0.17 
  -1  -2   5   11.32    0.20 
  -1  -2   5   11.24    0.22 
  -1   2   5   10.12    0.20 
   1   2  -5    9.98    0.19 
   0  -2   5    9.94    0.20 
   0  -2   5    9.76    0.19 
   0  -2  -5   10.13    0.21 
   0  -2  -5   10.10    0.17 
   0   2  -5    9.60    0.20 
   0   2   5    9.41    0.20 
   0   2  -5    9.73    0.17 
   0   2   5    9.46    0.18 
   1  -2   5    8.63    0.17 
   1  -2   5    8.55    0.19 
  -1  -2  -5    8.53    0.19 
  -1  -2  -5    8.90    0.16 
   1   2   5   10.66    0.19 
   1   2   5   10.48    0.22 
  -1   2  -5   10.26    0.22 
  -1   2  -5   10.63    0.18 
  -2  -2  -5   44.41    0.69 
  -2  -2  -5   45.45    0.66 
   2  -2   5   45.75    0.68 
   2  -2   5   46.06    0.69 
   2   2   5   46.53    0.73 
  -2   2  -5   46.26    0.72 
  -2   2  -5   47.38    0.65 
   2   2   5   47.52    0.67 
   3  -2   5   11.16    0.23 
   3  -2   5   11.35    0.23 
  -3  -2  -5   11.11    0.22 
  -3  -2  -5   11.38    0.24 
   3   2   5    9.47    0.23 
  -3   2  -5    9.83    0.22 
   3   2   5   10.12    0.17 
   4  -2   5   38.08    0.60 
  -4  -2  -5   37.76    0.60 
  -4  -2  -5   38.10    0.59 
   4  -2   5   38.09    0.60 
  -4   2  -5   41.95    0.66 
   4   2   5   40.81    0.68 
  -5  -2  -5    6.77    0.17 
   5  -2   5    6.63    0.18 
  -5  -2  -5    7.18    0.18 
   5  -2   5    6.70    0.18 
   5   2   5    6.33    0.20 
  -5   2  -5    6.16    0.18 
  -6  -2  -5   31.86    0.53 
   6  -2   5   32.08    0.55 
   6  -2   5   32.21    0.54 
  -6  -2  -5   32.57    0.54 
   6   2   5   32.20    0.59 
  -6   2  -5   32.05    0.55 
  -7  -2  -5    4.85    0.16 
   7  -2   5    5.26    0.17 
  -7  -2  -5    5.14    0.17 
  -7   2  -5    5.65    0.18 
   7   2   5    5.66    0.21 
  -7   2  -5    5.59    0.17 
  -8  -2  -5   20.26    0.40 
   8  -2   5   20.10    0.41 
  -8  -2  -5   20.57    0.39 
   8   2   5   22.16    0.47 
  -8   2  -5   22.29    0.42 
  -8   2  -5   22.24    0.43 
  -9  -2  -5   11.37    0.27 
  -9  -2  -5   10.85    0.28 
   9  -2   5   11.29    0.29 
  -9   2  -5   13.43    0.31 
  -9   2  -5   13.25    0.30 
   9   2   5   12.92    0.35 
  10  -2   5   15.20    0.36 
 -10  -2  -5   15.14    0.36 
 -10  -2  -5   16.42    0.35 
 -10   2  -5   15.51    0.34 
 -10   2  -5   15.95    0.36 
  10   2   5   16.08    0.40 
 -11  -2  -5    1.25    0.13 
  11  -2   5    1.59    0.14 
 -11   2  -5    1.49    0.13 
  11   2   5    1.21    0.14 
 -11   2  -5    1.46    0.14 
  11   2   5    1.46    0.13 
 -12  -2  -5    5.34    0.23 
  12  -2   5    5.72    0.23 
  12   2   5    4.67    0.20 
 -12   2  -5    4.94    0.21 
  12   2   5    4.99    0.24 
 -12   2  -5    4.58    0.19 
 -13  -2  -5    1.87    0.17 
  13  -2   5    1.96    0.18 
 -13   2  -5    2.54    0.17 
  13   2   5    2.59    0.17 
 -13   2  -5    2.54    0.18 
  13   2   5    2.74    0.21 
 -14  -2  -5    2.53    0.20 
  14  -2   5    2.77    0.20 
  14   2   5    1.52    0.16 
  14   2   5    1.61    0.19 
 -14   2  -5    1.42    0.17 
 -14   2  -5    1.22    0.13 
  15  -2   5   -0.11    0.09 
 -15  -2  -5    0.04    0.10 
  15   2   5    0.08    0.10 
 -15   2  -5    0.13    0.10 
  16  -2   5    1.58    0.18 
 -16  -2  -5    1.37    0.17 
  16   2   5    2.71    0.24 
 -16   2  -5    2.68    0.22 
  17  -2   5    2.45    0.23 
 -17   2  -5    2.25    0.22 
  17   2   5    2.31    0.24 
 -18   3   5    2.24    0.23 
 -17  -3   5    0.40    0.14 
  17  -3  -5    0.65    0.13 
  17   3  -5    0.64    0.15 
 -17   3   5    0.87    0.15 
  16  -3  -5    0.95    0.14 
 -16  -3   5    0.77    0.15 
  16   3  -5    0.78    0.15 
 -16   3   5    0.72    0.14 
 -15  -3   5    1.04    0.15 
  15  -3  -5    1.18    0.14 
  15   3  -5    1.44    0.17 
 -15   3   5    1.58    0.18 
 -14  -3   5    4.71    0.24 
  14  -3  -5    4.76    0.21 
 -14   3   5    6.00    0.26 
  14   3  -5    6.25    0.27 
  13  -3  -5    1.06    0.13 
 -13  -3   5    1.00    0.13 
 -13   3   5    1.60    0.17 
  13   3  -5    1.60    0.18 
  12  -3  -5    1.10    0.12 
 -12  -3   5    0.94    0.12 
  12  -3  -5    0.84    0.11 
 -12   3   5    1.80    0.16 
  12   3  -5    1.69    0.17 
  11  -3  -5    9.65    0.28 
 -11  -3   5    9.87    0.30 
  11  -3  -5    9.95    0.28 
 -11   3   5    8.87    0.27 
  11   3  -5    8.91    0.29 
 -10  -3   5    5.68    0.22 
  10  -3  -5    5.67    0.21 
  10  -3  -5    5.61    0.20 
  10   3  -5    4.95    0.21 
 -10   3   5    4.96    0.20 
   9  -3  -5   18.52    0.40 
  -9  -3   5   19.55    0.41 
   9  -3  -5   19.40    0.39 
  -9   3   5   18.35    0.40 
   9   3  -5   18.56    0.41 
   8  -3  -5   21.97    0.43 
  -8  -3   5   22.31    0.44 
   8  -3  -5   22.11    0.43 
  -8  -3   5   22.16    0.39 
  -8   3   5   21.07    0.42 
   8   3  -5   21.04    0.44 
   8   3  -5   21.62    0.43 
  -7  -3   5    0.84    0.09 
   7  -3  -5    0.78    0.09 
   7  -3  -5    0.81    0.09 
  -7  -3   5    0.95    0.07 
   7   3  -5    1.53    0.11 
   7   3  -5    1.88    0.10 
  -6  -3   5    8.14    0.18 
  -6  -3   5    8.06    0.22 
   6  -3  -5    8.29    0.22 
   6  -3  -5    7.94    0.21 
   6   3  -5    8.55    0.23 
  -6   3   5    8.43    0.23 
   6   3  -5    8.66    0.20 
  -5  -3   5   14.36    0.27 
  -5  -3   5   14.23    0.30 
   5  -3  -5   14.37    0.30 
   5  -3  -5   14.43    0.30 
   5   3  -5   15.23    0.29 
  -5   3   5   15.27    0.32 
   5   3  -5   15.08    0.32 
   4  -3  -5   12.84    0.28 
  -4  -3   5   13.23    0.26 
  -4  -3   5   13.04    0.28 
   4  -3  -5   13.46    0.28 
   4   3  -5   14.36    0.27 
   4   3  -5   14.20    0.29 
  -4   3   5   14.28    0.29 
   3  -3  -5   19.42    0.37 
  -3  -3   5   19.27    0.37 
  -3  -3   5   19.61    0.35 
   3  -3  -5   19.69    0.37 
  -3  -3   5   19.52    0.34 
   3   3  -5   16.35    0.31 
  -3   3   5   16.26    0.31 
  -2  -3   5    8.55    0.21 
  -2  -3   5    8.31    0.19 
   2  -3  -5    8.31    0.21 
  -2  -3   5    8.85    0.19 
  -2   3   5    8.12    0.19 
   2   3  -5    7.97    0.19 
   1  -3  -5   13.85    0.29 
   1  -3  -5   14.03    0.29 
   1  -3  -5   14.58    0.22 
  -1  -3   5   14.26    0.28 
  -1  -3   5   14.28    0.27 
  -1  -3   5   13.91    0.26 
  -1  -3   5   13.97    0.29 
  -1   3   5   14.34    0.27 
   0  -3   5    5.62    0.14 
   0  -3   5    5.58    0.15 
   0  -3  -5    5.82    0.12 
   0  -3   5    5.84    0.16 
   0  -3  -5    5.77    0.17 
   0   3   5    5.07    0.13 
   0   3  -5    5.16    0.16 
   1  -3   5    8.05    0.20 
  -1  -3  -5    7.87    0.16 
   1  -3   5    7.63    0.19 
   1  -3   5    8.03    0.16 
  -1  -3  -5    8.20    0.21 
  -1   3  -5    8.90    0.22 
   1   3   5    8.86    0.18 
   2  -3   5   16.17    0.31 
   2  -3   5   16.69    0.27 
  -2  -3  -5   16.29    0.29 
  -2  -3  -5   16.23    0.33 
   2  -3   5   15.86    0.32 
  -2   3  -5   15.51    0.32 
   2   3   5   15.59    0.33 
   2   3   5   16.22    0.27 
   3  -3   5    8.54    0.22 
   3  -3   5    8.59    0.21 
   3  -3   5    8.77    0.16 
  -3  -3  -5    8.40    0.22 
  -3  -3  -5    9.03    0.19 
  -3   3  -5   10.13    0.24 
   3   3   5   10.57    0.19 
   4  -3   5   10.42    0.25 
  -4  -3  -5   10.89    0.23 
   4  -3   5   10.54    0.25 
   4  -3   5   10.94    0.18 
  -4  -3  -5   10.75    0.26 
   4   3   5   12.60    0.30 
  -4   3  -5   11.89    0.27 
   5  -3   5    3.76    0.15 
   5  -3   5    4.06    0.15 
  -5  -3  -5    3.82    0.14 
  -5  -3  -5    3.85    0.15 
  -5   3  -5    4.22    0.16 
   5   3   5    4.43    0.18 
  -6  -3  -5   13.90    0.31 
   6  -3   5   13.87    0.31 
  -6  -3  -5   13.57    0.29 
  -6   3  -5   15.88    0.33 
   6   3   5   15.24    0.36 
  -6   3  -5   15.05    0.33 
  -7  -3  -5   25.41    0.47 
  -7  -3  -5   26.55    0.49 
   7  -3   5   25.56    0.49 
  -7   3  -5   27.72    0.52 
  -7   3  -5   28.97    0.52 
   7   3   5   29.12    0.58 
  -8  -3  -5    3.43    0.16 
   8  -3   5    2.94    0.16 
  -8  -3  -5    3.27    0.16 
  -8   3  -5    3.56    0.17 
  -8   3  -5    3.53    0.16 
   8   3   5    3.52    0.19 
  -9  -3  -5   11.55    0.30 
  -9  -3  -5   10.78    0.29 
   9  -3   5   11.64    0.31 
   9   3   5    9.39    0.31 
  -9   3  -5    9.99    0.27 
  -9   3  -5   10.03    0.28 
 -10  -3  -5    7.84    0.25 
  10  -3   5    7.70    0.26 
 -10  -3  -5    7.78    0.25 
  10   3   5    7.86    0.28 
 -10   3  -5    7.68    0.25 
 -10   3  -5    7.42    0.24 
  11  -3   5    4.71    0.22 
 -11  -3  -5    5.09    0.22 
 -11  -3  -5    5.00    0.22 
 -11   3  -5    4.26    0.19 
  11   3   5    3.97    0.23 
 -11   3  -5    3.93    0.20 
 -12  -3  -5    3.09    0.20 
  12  -3   5    2.90    0.19 
  12   3   5    2.13    0.19 
 -12   3  -5    2.18    0.17 
 -12   3  -5    2.24    0.16 
  12   3   5    2.27    0.18 
 -13  -3  -5    2.30    0.19 
  13  -3   5    2.35    0.20 
 -13   3  -5    2.63    0.19 
  13   3   5    2.76    0.22 
 -13   3  -5    2.86    0.19 
  13   3   5    2.86    0.19 
 -14  -3  -5    0.69    0.13 
  14  -3   5    0.45    0.12 
  14   3   5    0.67    0.14 
 -14   3  -5    0.86    0.13 
  14   3   5    0.64    0.13 
 -15  -3  -5    4.57    0.26 
  15  -3   5    4.55    0.26 
 -15   3  -5    5.56    0.26 
  15   3   5    5.96    0.27 
  15   3   5    5.34    0.29 
  16  -3   5    1.99    0.21 
 -16  -3  -5    1.63    0.19 
  16   3   5    1.85    0.21 
  17   3   5    0.52    0.15 
  16  -4  -5    1.04    0.15 
 -16   4   5    0.79    0.15 
  16   4  -5    0.71    0.17 
  15  -4  -5    4.06    0.24 
 -15  -4   5    4.11    0.26 
  15   4  -5    3.84    0.27 
 -15   4   5    3.92    0.25 
 -14  -4   5   -0.04    0.11 
  14  -4  -5    0.08    0.10 
  14   4  -5    0.27    0.12 
 -14   4   5    0.12    0.11 
 -13  -4   5    3.63    0.23 
  13  -4  -5    3.22    0.20 
 -13   4   5    2.78    0.21 
  13   4  -5    2.74    0.22 
 -12  -4   5    4.30    0.23 
  12  -4  -5    3.88    0.21 
 -12   4   5    4.24    0.23 
  12   4  -5    4.24    0.23 
  11  -4  -5    2.89    0.19 
 -11  -4   5    2.52    0.19 
 -11   4   5    2.31    0.18 
  11   4  -5    2.46    0.18 
  10  -4  -5    1.91    0.15 
 -10  -4   5    1.47    0.16 
  10  -4  -5    1.74    0.14 
  10   4  -5    2.00    0.17 
 -10   4   5    1.69    0.16 
   9  -4  -5    0.14    0.06 
   9  -4  -5    0.14    0.07 
  -9  -4   5    0.13    0.08 
   9   4  -5    0.45    0.10 
  -9   4   5    0.46    0.09 
   8  -4  -5    3.19    0.17 
   8  -4  -5    3.48    0.16 
  -8  -4   5    3.48    0.18 
   8   4  -5    1.91    0.15 
  -8   4   5    1.83    0.15 
   7  -4  -5    9.04    0.24 
  -7  -4   5    8.39    0.25 
   7  -4  -5    8.85    0.25 
   7   4  -5    9.45    0.27 
  -7   4   5    9.66    0.27 
   6  -4  -5    3.05    0.14 
  -6  -4   5    3.15    0.12 
   6  -4  -5    3.12    0.15 
  -6  -4   5    3.05    0.16 
  -6   4   5    4.50    0.18 
   6   4  -5    4.72    0.19 
   6   4  -5    4.01    0.16 
  -5  -4   5   16.93    0.32 
   5  -4  -5   16.02    0.36 
   5  -4  -5   15.60    0.34 
  -5  -4   5   16.04    0.35 
  -5   4   5   15.64    0.34 
   5   4  -5   15.72    0.32 
   5   4  -5   15.33    0.34 
   4  -4  -5   12.76    0.30 
  -4  -4   5   12.51    0.30 
  -4  -4   5   12.89    0.27 
   4  -4  -5   13.07    0.30 
   4   4  -5   11.73    0.28 
   4   4  -5   11.78    0.26 
  -4   4   5   11.19    0.27 
  -3  -4   5    2.71    0.13 
   3  -4  -5    2.52    0.13 
  -3  -4   5    2.63    0.13 
  -3  -4   5    2.69    0.12 
   3  -4  -5    2.39    0.13 
  -3   4   5    1.47    0.10 
   3   4  -5    1.37    0.10 
   3   4  -5    1.49    0.11 
  -2  -4   5   26.81    0.46 
  -2  -4   5   26.21    0.46 
   2  -4  -5   26.96    0.49 
   2  -4  -5   26.74    0.50 
  -2  -4   5   26.22    0.46 
  -2  -4   5   26.02    0.48 
  -2   4   5   25.81    0.46 
  -1  -4   5    7.37    0.21 
   1  -4  -5    7.50    0.22 
  -1  -4   5    7.72    0.20 
  -1  -4   5    7.36    0.20 
   1  -4  -5    7.29    0.22 
  -1  -4   5    7.30    0.19 
  -1   4   5    8.24    0.20 
   0  -4   5   21.04    0.40 
   0  -4   5   20.78    0.40 
   0  -4  -5   20.84    0.42 
   0  -4   5   21.85    0.38 
   0   4   5   24.23    0.42 
   0   4  -5   24.09    0.45 
   0   4   5   24.31    0.47 
   1  -4   5    5.29    0.17 
   1  -4   5    5.59    0.18 
  -1  -4  -5    5.45    0.14 
   1  -4   5    5.18    0.15 
  -1  -4  -5    4.91    0.18 
  -1   4  -5    6.55    0.20 
   1   4   5    6.41    0.16 
   1   4   5    6.56    0.21 
   2  -4   5    4.49    0.17 
  -2  -4  -5    4.60    0.18 
  -2  -4  -5    4.88    0.14 
   2  -4   5    4.82    0.17 
   2  -4   5    4.74    0.13 
   2   4   5    5.63    0.18 
  -2   4  -5    5.43    0.19 
  -3  -4  -5    8.19    0.20 
   3  -4   5    7.68    0.22 
   3  -4   5    7.81    0.22 
  -3  -4  -5    7.83    0.23 
   3   4   5    6.60    0.22 
  -3   4  -5    6.55    0.21 
  -4  -4  -5    9.26    0.26 
  -4  -4  -5    9.48    0.23 
   4  -4   5    9.61    0.26 
   4  -4   5    9.63    0.25 
   4   4   5    8.60    0.26 
  -4   4  -5    8.32    0.24 
  -5  -4  -5    5.18    0.17 
  -5  -4  -5    5.01    0.20 
   5  -4   5    4.64    0.18 
   5   4   5    3.96    0.19 
  -5   4  -5    4.11    0.17 
  -5   4  -5    4.02    0.17 
   6  -4   5    5.91    0.21 
  -6  -4  -5    6.22    0.20 
  -6  -4  -5    6.02    0.22 
  -6   4  -5    5.64    0.20 
   6   4   5    5.59    0.23 
  -6   4  -5    5.75    0.21 
  -7  -4  -5    4.43    0.20 
   7  -4   5    4.76    0.20 
  -7  -4  -5    4.64    0.18 
  -7   4  -5    4.78    0.20 
  -7   4  -5    4.92    0.19 
   7   4   5    4.47    0.21 
   8  -4   5    2.38    0.16 
  -8  -4  -5    2.24    0.17 
  -8  -4  -5    2.41    0.15 
   8   4   5    2.25    0.18 
  -8   4  -5    2.05    0.14 
  -8   4  -5    2.21    0.16 
  -9  -4  -5    5.62    0.23 
  -9  -4  -5    5.01    0.21 
   9  -4   5    5.37    0.23 
   9   4   5    4.75    0.24 
  -9   4  -5    4.87    0.21 
  10  -4   5    2.82    0.20 
 -10  -4  -5    3.21    0.20 
 -10  -4  -5    3.17    0.19 
 -10   4  -5    2.54    0.19 
  10   4   5    2.80    0.20 
 -11  -4  -5    1.57    0.18 
 -11  -4  -5    1.43    0.16 
  11  -4   5    1.50    0.16 
 -11   4  -5    2.30    0.18 
  11   4   5    2.42    0.20 
  12  -4   5   10.86    0.35 
 -12  -4  -5   11.09    0.35 
 -12   4  -5   12.86    0.37 
  12   4   5   11.40    0.40 
  12   4   5   12.58    0.37 
 -13  -4  -5    1.73    0.19 
  13  -4   5    1.58    0.19 
 -13   4  -5    1.48    0.17 
  13   4   5    1.49    0.18 
  13   4   5    1.25    0.16 
 -14  -4  -5    6.91    0.31 
  14  -4   5    7.06    0.31 
 -14   4  -5    6.13    0.28 
  14   4   5    6.42    0.29 
  14   4   5    5.82    0.31 
 -15  -4  -5    0.47    0.15 
  15   4   5    0.98    0.17 
 -15   4  -5    0.38    0.14 
  15   4   5    0.58    0.15 
  16   4   5    0.43    0.17 
  14  -5  -5    2.33    0.22 
 -14  -5   5    2.27    0.24 
 -14   5   5    3.25    0.27 
  14   5  -5    3.28    0.31 
 -13  -5   5    0.35    0.13 
  13  -5  -5    0.13    0.11 
  13   5  -5    0.17    0.12 
 -13   5   5    0.13    0.11 
 -12  -5   5    2.46    0.22 
  12  -5  -5    2.67    0.21 
 -12   5   5    3.06    0.22 
  12   5  -5    3.05    0.24 
  11  -5  -5    0.44    0.12 
 -11  -5   5    0.54    0.12 
 -11   5   5    0.16    0.11 
  11   5  -5    0.35    0.12 
 -10  -5   5    6.59    0.27 
  10  -5  -5    6.85    0.27 
  10   5  -5    6.72    0.29 
 -10   5   5    6.87    0.27 
   9  -5  -5    4.07    0.21 
  -9  -5   5    4.15    0.21 
   9   5  -5    3.84    0.22 
  -9   5   5    3.81    0.21 
  -8  -5   5    3.60    0.20 
   8  -5  -5    3.13    0.17 
   8  -5  -5    3.54    0.20 
   8   5  -5    3.64    0.21 
  -8   5   5    3.06    0.19 
  -7  -5   5    1.50    0.14 
   7  -5  -5    1.49    0.16 
   7  -5  -5    1.59    0.13 
   7   5  -5    1.79    0.17 
  -7   5   5    1.85    0.16 
   6  -5  -5    0.90    0.11 
   6  -5  -5    1.08    0.13 
  -6  -5   5    1.02    0.12 
  -6   5   5    1.86    0.15 
   6   5  -5    1.87    0.16 
   5  -5  -5    2.95    0.16 
  -5  -5   5    2.73    0.16 
   5  -5  -5    2.84    0.17 
  -5   5   5    2.40    0.16 
   5   5  -5    2.87    0.17 
  -4  -5   5    6.59    0.23 
   4  -5  -5    6.45    0.24 
   4  -5  -5    7.01    0.23 
  -4  -5   5    7.00    0.20 
   4   5  -5    6.51    0.22 
  -4   5   5    6.37    0.22 
   4   5  -5    6.99    0.22 
  -3  -5   5   11.84    0.31 
   3  -5  -5   12.17    0.32 
  -3  -5   5   11.98    0.28 
  -3  -5   5   11.78    0.29 
   3  -5  -5   12.02    0.31 
  -3   5   5   12.06    0.30 
   3   5  -5   12.44    0.30 
   2  -5  -5    1.06    0.12 
  -2  -5   5    1.15    0.11 
   2  -5  -5    1.10    0.13 
  -2  -5   5    1.22    0.12 
  -2  -5   5    0.93    0.10 
  -2  -5   5    1.04    0.11 
  -2   5   5    1.78    0.12 
   1  -5  -5   15.41    0.37 
  -1  -5   5   15.97    0.36 
  -1  -5   5   15.85    0.35 
  -1  -5   5   15.70    0.34 
  -1  -5   5   16.22    0.35 
  -1   5   5   17.54    0.40 
  -1   5   5   17.24    0.35 
   0  -5  -5   16.03    0.37 
   0  -5   5   15.97    0.36 
   0  -5   5   15.75    0.33 
   0  -5   5   16.06    0.36 
   0   5  -5   12.95    0.32 
   0   5   5   12.97    0.29 
   0   5   5   13.31    0.34 
   1  -5   5    1.58    0.13 
   1  -5   5    1.58    0.11 
  -1  -5  -5    1.66    0.15 
   1  -5   5    1.69    0.13 
  -1   5  -5    2.12    0.14 
   1   5   5    2.47    0.16 
   2  -5   5   22.65    0.46 
  -2  -5  -5   22.67    0.48 
  -2   5  -5   23.40    0.47 
  -2   5  -5   23.08    0.47 
   2   5   5   23.57    0.50 
   3  -5   5    0.10    0.08 
  -3  -5  -5    0.13    0.08 
   3   5   5    0.32    0.09 
  -3   5  -5    0.40    0.10 
  -3   5  -5    0.24    0.08 
   4  -5   5   15.02    0.37 
  -4  -5  -5   14.70    0.37 
  -4   5  -5   17.34    0.39 
   4   5   5   16.94    0.42 
  -5  -5  -5    3.71    0.21 
  -5  -5  -5    3.49    0.20 
   5  -5   5    3.42    0.18 
  -5   5  -5    3.60    0.19 
   5   5   5    3.64    0.21 
  -6  -5  -5    1.25    0.14 
  -6  -5  -5    1.46    0.13 
   6  -5   5    1.19    0.13 
  -6   5  -5    1.56    0.16 
   6   5   5    1.52    0.16 
   7  -5   5    3.19    0.19 
  -7  -5  -5    3.30    0.21 
  -7  -5  -5    3.31    0.17 
   7   5   5    2.93    0.20 
  -7   5  -5    2.56    0.19 
  -8  -5  -5    0.15    0.10 
  -8  -5  -5    0.13    0.08 
   8  -5   5    0.20    0.10 
  -8   5  -5    0.22    0.10 
   8   5   5    0.51    0.12 
   9  -5   5    3.36    0.22 
  -9  -5  -5    3.52    0.20 
  -9  -5  -5    3.38    0.21 
  -9   5  -5    4.12    0.24 
   9   5   5    4.58    0.26 
  10  -5   5    3.71    0.24 
 -10  -5  -5    3.09    0.21 
 -10  -5  -5    3.31    0.21 
 -10   5  -5    3.29    0.22 
  10   5   5    3.09    0.23 
 -11  -5  -5    5.12    0.25 
 -11  -5  -5    4.63    0.26 
  11  -5   5    5.01    0.27 
  11   5   5    4.26    0.26 
 -11   5  -5    3.83    0.25 
 -12  -5  -5    0.00    0.11 
 -12  -5  -5    0.28    0.11 
  12  -5   5    0.21    0.12 
 -12   5  -5    0.16    0.12 
  12   5   5    0.38    0.14 
 -13  -5  -5    4.26    0.27 
  13   5   5    4.47    0.28 
 -13   5  -5    5.38    0.29 
  13   5   5    5.26    0.31 
  14   5   5    0.27    0.13 
 -12  -6   5    0.09    0.13 
  11  -6  -5    1.61    0.18 
 -11  -6   5    1.56    0.18 
  11   6  -5    1.49    0.18 
 -11   6   5    1.54    0.18 
  10  -6  -5    0.12    0.11 
 -10  -6   5    0.04    0.10 
 -10   6   5    0.04    0.11 
  10   6  -5    0.33    0.13 
  -9  -6   5    0.94    0.14 
   9  -6  -5    0.94    0.15 
   9   6  -5    0.99    0.15 
  -9   6   5    0.96    0.15 
  -8  -6   5    0.27    0.11 
   8  -6  -5    0.32    0.11 
  -8   6   5    0.40    0.12 
   8   6  -5    0.50    0.13 
  -7  -6   5    0.96    0.13 
   7  -6  -5    0.64    0.13 
  -7   6   5    0.94    0.14 
   7   6  -5    0.86    0.14 
  -6  -6   5    1.37    0.16 
   6  -6  -5    1.62    0.18 
   6  -6  -5    1.32    0.15 
   6   6  -5    1.00    0.13 
  -6   6   5    1.19    0.14 
  -5  -6   5    0.43    0.10 
   5  -6  -5    0.51    0.10 
   5  -6  -5    0.43    0.11 
   5   6  -5    0.27    0.10 
  -5   6   5    0.23    0.09 
  -4  -6   5   10.08    0.30 
   4  -6  -5    9.51    0.32 
   4  -6  -5    9.55    0.30 
   4   6  -5    8.37    0.28 
  -4   6   5    8.09    0.27 
   3  -6  -5    1.33    0.15 
   3  -6  -5    1.33    0.16 
  -3  -6   5    1.35    0.15 
  -3  -6   5    1.27    0.15 
  -3   6   5    1.27    0.14 
  -2  -6   5    5.47    0.21 
   2  -6  -5    5.30    0.23 
  -2  -6   5    5.46    0.22 
  -2   6   5    4.58    0.19 
   2   6  -5    4.58    0.21 
  -2   6   5    4.76    0.23 
  -1  -6   5    3.10    0.18 
  -1  -6   5    3.22    0.17 
   1  -6  -5    3.09    0.19 
   1   6  -5    3.77    0.18 
  -1   6   5    3.43    0.20 
   0  -6   5   13.35    0.36 
   0  -6  -5   14.41    0.38 
   0   6   5   12.71    0.37 
   0   6  -5   13.21    0.34 
   1  -6   5    9.72    0.30 
  -1  -6  -5    9.20    0.31 
   1   6   5    9.77    0.32 
  -1   6  -5    9.39    0.29 
  -2  -6  -5    5.22    0.24 
   2  -6   5    5.39    0.23 
  -2   6  -5    5.78    0.24 
   2   6   5    6.13    0.27 
   3  -6   5    2.41    0.18 
  -3  -6  -5    2.79    0.20 
   3   6   5    3.16    0.21 
  -3   6  -5    2.81    0.19 
  -4  -6  -5    0.62    0.13 
   4  -6   5    0.70    0.12 
   4   6   5    0.85    0.14 
  -4   6  -5    1.08    0.14 
  -5  -6  -5    0.02    0.10 
   5  -6   5    0.03    0.09 
  -5   6  -5    0.24    0.11 
   5   6   5    0.00    0.10 
  -6  -6  -5    0.37    0.12 
   6  -6   5    0.24    0.11 
   6   6   5    0.68    0.14 
  -6   6  -5    0.66    0.13 
  -7  -6  -5    0.91    0.14 
   7  -6   5    0.89    0.14 
  -7   6  -5    1.11    0.15 
   7   6   5    1.26    0.17 
   8  -6   5    1.86    0.20 
  -8  -6  -5    1.97    0.21 
  -8   6  -5    1.35    0.17 
   8   6   5    1.43    0.18 
  -9  -6  -5    0.02    0.11 
   9  -6   5    0.09    0.11 
   9   6   5   -0.09    0.11 
  -9   6  -5    0.02    0.11 
  10  -6   5    1.93    0.22 
 -10  -6  -5    2.35    0.23 
  10   6   5    2.08    0.23 
 -10   6  -5    1.97    0.22 
  11   6   5    0.25    0.13 
  -9  -7   5    0.65    0.14 
  -8  -7   5   -0.11    0.15 
   8   7  -5    0.00    0.12 
  -8   7   5    0.11    0.13 
  -7   7   5    1.02    0.16 
   7   7  -5    0.90    0.16 
   6  -7  -5    1.34    0.18 
  -6   7   5    1.47    0.17 
   6   7  -5    1.31    0.17 
   5  -7  -5    5.69    0.29 
   5   7  -5    5.70    0.27 
  -5   7   5    5.71    0.26 
   4  -7  -5    0.29    0.11 
   4  -7  -5    0.33    0.12 
   4   7  -5    0.24    0.11 
   3  -7  -5    8.90    0.32 
  -3   7   5   10.57    0.37 
   2  -7  -5    1.02    0.14 
  -2   7   5    0.76    0.14 
   1  -7  -5    4.05    0.24 
  -1   7   5    2.93    0.23 
   0  -7  -5    1.65    0.17 
   0  -7   5    1.63    0.17 
   0   7   5    1.53    0.17 
   1  -7   5    0.85    0.14 
  -1  -7  -5    1.16    0.15 
   1   7   5    0.62    0.14 
  -1   7  -5    0.73    0.13 
   2  -7   5    2.42    0.21 
  -2  -7  -5    2.73    0.22 
   2   7   5    2.05    0.22 
  -2   7  -5    2.11    0.19 
  -3  -7  -5    1.11    0.16 
   3  -7   5    0.89    0.15 
   3   7   5    0.98    0.16 
  -3   7  -5    1.28    0.16 
  -4  -7  -5    3.45    0.25 
   4  -7   5    3.86    0.25 
  -4   7  -5    3.92    0.25 
   4   7   5    3.78    0.26 
   5  -7   5    0.42    0.13 
  -5  -7  -5    0.36    0.13 
   5   7   5    0.67    0.16 
  -5   7  -5    0.42    0.13 
   6  -7   5    1.34    0.17 
   6   7   5    1.59    0.20 
  -6   7  -5    1.80    0.21 
   7   7   5    0.74    0.16 
 -18   0   6    3.84    0.28 
 -17   0   6    3.53    0.21 
  17   0  -6    3.85    0.24 
 -16   0   6    3.01    0.20 
  16   0  -6    3.07    0.22 
  15   0  -6    0.07    0.08 
 -15   0   6    0.03    0.08 
 -14   0   6   10.03    0.28 
 -14   0   6   10.06    0.28 
  14   0  -6    9.12    0.30 
 -13   0   6    2.55    0.14 
  13   0  -6    2.52    0.16 
 -13   0   6    2.37    0.15 
 -12   0   6   32.02    0.58 
  12   0  -6   32.53    0.54 
  12   0  -6   32.57    0.62 
 -12   0   6   33.26    0.58 
  11   0  -6    3.77    0.13 
 -11   0   6    3.79    0.15 
 -11   0   6    3.99    0.16 
  11   0  -6    3.66    0.17 
  10   0  -6    0.45    0.07 
  10   0  -6    0.39    0.05 
 -10   0   6    0.34    0.06 
 -10   0   6    0.33    0.06 
  -9   0   6    0.09    0.04 
   9   0  -6    0.06    0.03 
   9   0  -6    0.06    0.05 
  -9   0   6    0.04    0.04 
   8   0  -6    0.87    0.09 
  -8   0   6    0.93    0.07 
   8   0  -6    0.95    0.06 
  -8   0   6    1.00    0.08 
  -7   0   6    2.73    0.10 
   7   0  -6    2.87    0.08 
  -7   0   6    2.99    0.11 
   6   0  -6    0.04    0.03 
  -6   0   6    0.12    0.04 
  -6   0   6    0.04    0.03 
   5   0  -6   66.93    1.00 
  -5   0   6   68.25    1.00 
  -5   0   6   68.59    0.97 
   5   0  -6   68.58    0.93 
  -4   0   6   44.61    0.69 
   4   0  -6   44.33    0.69 
   4   0  -6   47.04    0.63 
  -4   0   6   44.98    0.66 
   3   0  -6   43.97    0.67 
  -3   0   6   45.02    0.64 
  -3   0   6   43.97    0.67 
   2   0  -6    9.13    0.19 
  -2   0   6    9.35    0.19 
  -2   0   6    9.19    0.17 
  -2   0   6    9.47    0.15 
  -1   0   6   11.53    0.23 
   1   0  -6   11.92    0.21 
   1   0  -6   11.84    0.22 
  -1   0   6   12.00    0.20 
   0   0  -6  136.08    1.85 
   0   0  -6  136.12    1.86 
   0   0   6  135.27    1.87 
   0   0   6  134.49    1.85 
  -1   0  -6    0.19    0.03 
  -1   0  -6    0.27    0.03 
   1   0   6    0.19    0.03 
   1   0   6    0.21    0.03 
  -2   0  -6   43.73    0.66 
  -2   0  -6   43.94    0.62 
   2   0   6   43.70    0.67 
   2   0   6   43.31    0.64 
   3   0   6    2.71    0.08 
  -3   0  -6    2.54    0.10 
   3   0   6    2.44    0.10 
  -3   0  -6    2.63    0.07 
   4   0   6   39.90    0.65 
  -4   0  -6   40.43    0.58 
  -4   0  -6   39.98    0.63 
   4   0   6   40.56    0.59 
  -5   0  -6   11.74    0.20 
   5   0   6   11.20    0.26 
  -5   0  -6   11.40    0.25 
   5   0   6   11.59    0.21 
  -6   0  -6   27.43    0.42 
  -6   0  -6   27.07    0.47 
   6   0   6   27.47    0.43 
   7   0   6    1.05    0.06 
   7   0   6    0.78    0.09 
   7   0   6    0.87    0.06 
  -7   0  -6    0.95    0.09 
   8   0   6    8.02    0.24 
  -8   0  -6    8.02    0.18 
   8   0   6    8.67    0.18 
  -8   0  -6    8.10    0.23 
   9   0   6    0.08    0.06 
   9   0   6    0.21    0.04 
  -9   0  -6    0.13    0.06 
  -9   0  -6    0.21    0.05 
 -10   0  -6    2.43    0.11 
 -10   0  -6    2.27    0.15 
  10   0   6    2.30    0.15 
  11   0   6   23.00    0.50 
 -11   0  -6   22.78    0.48 
  12   0   6    1.81    0.17 
 -12   0  -6    1.80    0.16 
 -13   0  -6    9.36    0.30 
  13   0   6    8.29    0.30 
 -14   0  -6    5.52    0.25 
  14   0   6    4.59    0.25 
 -15   0  -6    3.90    0.23 
  15   0   6    4.02    0.24 
 -16   0  -6   13.32    0.41 
  16   0   6   13.05    0.42 
  17   0   6    3.42    0.25 
 -17   0  -6    3.45    0.26 
 -19  -1   6    2.37    0.23 
  19   1  -6    3.22    0.26 
 -18  -1   6    0.48    0.13 
  18   1  -6    0.82    0.15 
 -17  -1   6    5.43    0.26 
  17   1  -6    4.91    0.27 
  16  -1  -6    0.22    0.10 
 -16  -1   6    0.11    0.10 
  16   1  -6    0.52    0.12 
 -16   1   6    0.14    0.09 
 -15  -1   6   12.63    0.36 
  15  -1  -6   13.23    0.38 
 -15   1   6   13.53    0.36 
  15   1  -6   12.68    0.38 
 -14  -1   6    0.40    0.10 
  14  -1  -6    0.62    0.09 
  14  -1  -6    0.63    0.11 
  14   1  -6    0.85    0.12 
 -14   1   6    0.72    0.10 
  13  -1  -6    8.88    0.29 
  13  -1  -6    9.39    0.25 
 -13  -1   6    9.45    0.28 
  13   1  -6    8.74    0.29 
 -13   1   6    9.23    0.27 
 -13   1   6    8.97    0.24 
  12  -1  -6    0.64    0.08 
 -12  -1   6    0.79    0.09 
 -12  -1   6    0.67    0.09 
  12  -1  -6    0.82    0.11 
  12   1  -6    0.73    0.11 
 -12   1   6    0.74    0.09 
 -12   1   6    0.81    0.10 
  11  -1  -6    4.95    0.16 
 -11  -1   6    4.84    0.17 
  11  -1  -6    5.02    0.20 
 -11  -1   6    5.07    0.19 
 -11   1   6    5.17    0.19 
 -11   1   6    5.18    0.16 
  11   1  -6    4.89    0.20 
  10  -1  -6    3.02    0.15 
  10  -1  -6    3.03    0.12 
 -10  -1   6    3.15    0.14 
 -10  -1   6    2.80    0.13 
 -10   1   6    3.64    0.13 
 -10   1   6    3.74    0.16 
  10   1  -6    4.41    0.18 
  10   1  -6    3.88    0.12 
   9  -1  -6    0.43    0.06 
  -9  -1   6    0.42    0.06 
  -9  -1   6    0.42    0.06 
   9  -1  -6    0.35    0.07 
  -9   1   6    0.05    0.05 
   9   1  -6    0.06    0.05 
  -9   1   6    0.06    0.04 
   9   1  -6    0.17    0.04 
  -8  -1   6   18.94    0.36 
   8  -1  -6   18.66    0.33 
  -8  -1   6   18.64    0.36 
   8  -1  -6   19.26    0.39 
   8   1  -6   18.21    0.30 
  -8   1   6   17.97    0.31 
   8   1  -6   17.39    0.36 
  -8   1   6   18.01    0.35 
  -7  -1   6   10.64    0.23 
   7  -1  -6   10.48    0.26 
  -7  -1   6   10.60    0.24 
   7  -1  -6   10.40    0.21 
  -7   1   6   12.77    0.27 
   7   1  -6   13.25    0.22 
   7   1  -6   12.32    0.28 
  -7   1   6   13.04    0.23 
   6  -1  -6    5.93    0.18 
  -6  -1   6    6.16    0.17 
   6  -1  -6    6.19    0.14 
  -6  -1   6    5.99    0.16 
  -6   1   6    8.35    0.16 
   6   1  -6    8.34    0.14 
   6   1  -6    8.13    0.20 
  -6   1   6    8.06    0.20 
  -5  -1   6    8.59    0.19 
  -5  -1   6    8.68    0.20 
   5  -1  -6    8.45    0.17 
  -5   1   6    7.15    0.14 
   5   1  -6    7.07    0.11 
  -5   1   6    7.03    0.17 
   5   1  -6    6.91    0.18 
   4  -1  -6   34.58    0.51 
   4  -1  -6   33.87    0.56 
  -4  -1   6   34.11    0.53 
  -4  -1   6   35.36    0.56 
   4   1  -6   37.50    0.58 
  -4   1   6   37.18    0.53 
  -4   1   6   36.92    0.58 
  -3  -1   6   13.31    0.25 
   3  -1  -6   13.00    0.22 
  -3  -1   6   13.11    0.26 
   3  -1  -6   13.21    0.26 
   3   1  -6   12.64    0.24 
  -3   1   6   12.58    0.24 
  -2  -1   6   86.94    1.24 
  -2  -1   6   88.65    1.18 
   2  -1  -6   90.72    1.20 
  -2  -1   6   85.66    1.25 
   2  -1  -6   86.02    1.25 
   2  -1  -6   87.88    1.21 
   2   1  -6   94.78    1.31 
  -2   1   6   94.46    1.30 
  -2   1   6   92.21    1.32 
  -1  -1   6   50.29    0.69 
   1  -1  -6   50.68    0.71 
   1  -1  -6   49.85    0.74 
  -1  -1   6   49.38    0.74 
  -1   1   6   55.49    0.80 
   1   1  -6   55.76    0.82 
   1   1  -6   57.21    0.80 
  -1   1   6   56.23    0.81 
   0  -1  -6   25.16    0.38 
   0  -1  -6   24.60    0.40 
   0  -1   6   25.44    0.37 
   0   1   6   21.95    0.36 
   0   1  -6   22.23    0.37 
   0   1   6   21.72    0.36 
   0   1  -6   22.98    0.34 
  -1  -1  -6   58.87    0.85 
   1  -1   6   58.40    0.86 
   1  -1   6   60.44    0.84 
  -1  -1  -6   58.27    0.84 
  -1   1  -6   57.82    0.86 
  -1   1  -6   59.25    0.81 
   1   1   6   56.37    0.85 
   1   1   6   59.19    0.84 
  -2  -1  -6    2.65    0.09 
   2  -1   6    2.72    0.09 
  -2  -1  -6    2.79    0.09 
   2  -1   6    2.62    0.09 
   2   1   6    3.19    0.09 
   2   1   6    3.05    0.11 
  -2   1  -6    3.29    0.07 
  -2   1  -6    2.98    0.11 
   3  -1   6    9.42    0.19 
  -3  -1  -6    9.29    0.19 
  -3  -1  -6    9.40    0.19 
   3  -1   6    9.28    0.20 
   3   1   6   11.71    0.20 
  -3   1  -6   11.34    0.24 
   3   1   6   11.50    0.25 
  -4  -1  -6   38.02    0.59 
   4  -1   6   37.76    0.58 
  -4  -1  -6   37.73    0.57 
   4  -1   6   37.79    0.60 
   4   1   6   39.67    0.66 
  -4   1  -6   40.79    0.64 
   4   1   6   40.44    0.58 
   5  -1   6    6.68    0.18 
  -5  -1  -6    5.96    0.16 
  -5  -1  -6    6.16    0.15 
   5  -1   6    6.40    0.16 
   5   1   6    7.46    0.21 
   5   1   6    7.91    0.14 
  -5   1  -6    7.96    0.20 
   6  -1   6   14.85    0.32 
  -6  -1  -6   15.08    0.28 
   6  -1   6   14.67    0.28 
  -6  -1  -6   14.84    0.30 
   6   1   6   13.39    0.31 
  -6   1  -6   13.05    0.28 
   6   1   6   13.07    0.21 
   7  -1   6    6.85    0.18 
  -7  -1  -6    6.89    0.20 
  -7  -1  -6    7.17    0.17 
  -7  -1  -6    7.19    0.13 
   7  -1   6    6.73    0.20 
   7   1   6    8.03    0.24 
  -7   1  -6    7.68    0.21 
  -8  -1  -6    3.43    0.12 
   8  -1   6    3.31    0.15 
  -8  -1  -6    3.48    0.15 
  -8   1  -6    3.44    0.15 
   8   1   6    4.31    0.19 
  -8   1  -6    4.16    0.14 
   9  -1   6    0.19    0.07 
  -9  -1  -6    0.22    0.07 
  -9  -1  -6    0.14    0.05 
  -9   1  -6    0.14    0.07 
   9   1   6    0.02    0.06 
  -9   1  -6    0.03    0.05 
 -10  -1  -6   12.56    0.31 
  10  -1   6   12.23    0.32 
 -10   1  -6   12.31    0.27 
 -10   1  -6   12.22    0.31 
  10   1   6   12.39    0.34 
  10   1   6   12.43    0.28 
  11  -1   6    0.79    0.11 
 -11  -1  -6    0.72    0.10 
 -11   1  -6    0.56    0.08 
  11   1   6    0.53    0.08 
  11   1   6    0.70    0.11 
 -11   1  -6    0.49    0.09 
 -12  -1  -6   22.15    0.48 
  12  -1   6   22.48    0.50 
  12   1   6   21.45    0.51 
 -12   1  -6   21.65    0.48 
 -12   1  -6   22.45    0.43 
  13  -1   6    1.39    0.15 
 -13  -1  -6    1.36    0.14 
 -13   1  -6    0.68    0.12 
  13   1   6    0.78    0.13 
  14  -1   6   10.14    0.34 
 -14  -1  -6    9.80    0.33 
 -14   1  -6   10.06    0.33 
  14   1   6   10.40    0.35 
 -15  -1  -6    2.81    0.22 
  15  -1   6    2.91    0.22 
 -15   1  -6    4.37    0.24 
  15   1   6    4.67    0.26 
 -16  -1  -6    1.40    0.17 
  16  -1   6    1.24    0.16 
 -16   1  -6    1.02    0.15 
  16   1   6    1.01    0.16 
 -17  -1  -6    2.22    0.24 
  17  -1   6    2.07    0.22 
  17   1   6    3.04    0.25 
 -17   1  -6    2.60    0.23 
 -18  -2   6    1.75    0.19 
  18   2  -6    1.83    0.20 
 -17  -2   6    1.37    0.17 
  17   2  -6    1.15    0.17 
 -17   2   6    1.02    0.15 
 -16  -2   6    5.33    0.26 
  16   2  -6    4.54    0.26 
 -16   2   6    4.18    0.23 
  15  -2  -6    0.39    0.10 
 -15  -2   6    0.40    0.11 
  15   2  -6    0.42    0.11 
 -15   2   6    0.47    0.11 
  14  -2  -6    4.03    0.19 
 -14  -2   6    3.81    0.21 
  14  -2  -6    3.60    0.22 
  14   2  -6    3.42    0.21 
 -14   2   6    3.39    0.20 
  13  -2  -6    3.57    0.17 
 -13  -2   6    3.28    0.19 
  13  -2  -6    3.23    0.20 
  13   2  -6    3.58    0.20 
 -13   2   6    3.38    0.19 
  12  -2  -6    7.90    0.27 
  12  -2  -6    7.15    0.22 
 -12  -2   6    7.56    0.25 
  12   2  -6   10.15    0.30 
 -12   2   6    9.65    0.28 
  11  -2  -6    5.41    0.18 
 -11  -2   6    4.93    0.20 
  11  -2  -6    4.84    0.22 
 -11   2   6    3.31    0.16 
  11   2  -6    3.66    0.19 
  10  -2  -6   26.14    0.53 
  10  -2  -6   26.47    0.47 
 -10  -2   6   26.45    0.50 
 -10  -2   6   26.70    0.49 
  10   2  -6   27.67    0.54 
 -10   2   6   27.92    0.52 
  -9  -2   6   10.99    0.27 
  -9  -2   6   10.53    0.26 
   9  -2  -6   10.96    0.25 
   9  -2  -6   10.86    0.29 
   9   2  -6   11.83    0.30 
  -9   2   6   12.00    0.29 
  -8  -2   6   18.11    0.37 
  -8  -2   6   18.47    0.37 
   8  -2  -6   18.20    0.35 
   8  -2  -6   18.75    0.40 
  -8   2   6   16.18    0.35 
   8   2  -6   16.94    0.36 
   8   2  -6   17.35    0.30 
  -7  -2   6    6.10    0.18 
   7  -2  -6    6.25    0.17 
   7  -2  -6    6.03    0.20 
  -7  -2   6    6.20    0.18 
  -7   2   6    4.58    0.16 
  -7   2   6    4.66    0.10 
   7   2  -6    4.59    0.12 
   7   2  -6    4.41    0.16 
  -6  -2   6    1.49    0.09 
   6  -2  -6    1.51    0.10 
   6  -2  -6    1.63    0.09 
  -6  -2   6    1.51    0.09 
  -6   2   6    0.84    0.08 
   6   2  -6    0.60    0.07 
   6   2  -6    1.07    0.06 
  -6   2   6    0.82    0.04 
  -5  -2   6   20.00    0.37 
   5  -2  -6   20.41    0.36 
  -5  -2   6   20.61    0.37 
   5  -2  -6   20.91    0.40 
  -5   2   6   20.51    0.38 
   5   2  -6   20.67    0.33 
   5   2  -6   20.59    0.38 
   4  -2  -6   12.87    0.25 
   4  -2  -6   13.08    0.28 
  -4  -2   6   12.47    0.25 
   4   2  -6   11.18    0.24 
  -4   2   6   11.44    0.24 
   4   2  -6   11.46    0.20 
   3  -2  -6   23.67    0.39 
  -3  -2   6   22.87    0.40 
  -3  -2   6   22.87    0.39 
  -3  -2   6   23.29    0.35 
   3  -2  -6   23.04    0.41 
   3   2  -6   25.92    0.43 
  -3   2   6   25.99    0.43 
  -2  -2   6   33.59    0.55 
   2  -2  -6   33.87    0.53 
  -2  -2   6   33.92    0.54 
  -2  -2   6   34.55    0.50 
   2  -2  -6   33.73    0.55 
  -2   2   6   31.39    0.50 
   2   2  -6   31.57    0.49 
   1  -2  -6   20.05    0.29 
  -1  -2   6   19.78    0.31 
  -1  -2   6   19.27    0.35 
  -1  -2   6   19.36    0.34 
   1  -2  -6   20.10    0.36 
  -1   2   6   21.78    0.37 
  -1   2   6   21.98    0.36 
   1   2  -6   21.84    0.35 
   0  -2  -6   59.35    0.89 
   0  -2   6   59.16    0.85 
   0  -2  -6   61.60    0.83 
   0  -2   6   58.93    0.88 
   0   2  -6   58.05    0.81 
   0   2   6   56.23    0.85 
   0   2   6   57.37    0.82 
   0   2  -6   56.68    0.85 
   1  -2   6    7.34    0.16 
  -1  -2  -6    7.92    0.15 
   1  -2   6    7.48    0.18 
  -1  -2  -6    7.65    0.18 
   1   2   6   10.37    0.19 
  -1   2  -6   10.41    0.18 
  -1   2  -6   10.00    0.23 
   1   2   6   10.23    0.22 
  -2  -2  -6   58.01    0.87 
   2  -2   6   58.83    0.85 
   2  -2   6   57.20    0.86 
  -2  -2  -6   57.96    0.84 
  -2   2  -6   70.34    0.95 
  -2   2  -6   68.07    1.03 
   2   2   6   67.32    1.03 
   2   2   6   70.40    0.97 
   3  -2   6    9.74    0.22 
  -3  -2  -6    9.44    0.20 
   3  -2   6    9.57    0.21 
  -3  -2  -6    9.47    0.21 
   3   2   6   11.23    0.20 
   3   2   6   11.02    0.26 
  -3   2  -6   11.26    0.25 
   4  -2   6    8.99    0.21 
   4  -2   6    9.08    0.21 
  -4  -2  -6    9.07    0.20 
  -4  -2  -6    8.89    0.21 
   4   2   6    7.29    0.13 
   4   2   6    7.03    0.21 
  -4   2  -6    7.02    0.19 
   5  -2   6    6.54    0.18 
  -5  -2  -6    6.32    0.18 
  -5  -2  -6    6.36    0.17 
   5  -2   6    6.97    0.18 
  -5   2  -6    8.31    0.22 
   5   2   6    8.47    0.24 
  -6  -2  -6    7.75    0.20 
   6  -2   6    7.92    0.21 
  -6  -2  -6    7.88    0.20 
   6  -2   6    8.11    0.21 
   6   2   6    8.80    0.25 
  -6   2  -6    8.21    0.22 
  -7  -2  -6    1.58    0.11 
   7  -2   6    1.63    0.11 
   7  -2   6    1.70    0.12 
  -7  -2  -6    1.58    0.10 
  -7   2  -6    2.22    0.13 
   7   2   6    2.07    0.14 
  -8  -2  -6    3.80    0.15 
  -8  -2  -6    3.83    0.16 
   8  -2   6    4.07    0.17 
   8   2   6    4.34    0.20 
  -8   2  -6    4.34    0.17 
  -8   2  -6    4.31    0.16 
   9  -2   6    9.99    0.28 
  -9  -2  -6   10.36    0.28 
  -9  -2  -6   10.13    0.26 
   9   2   6    8.06    0.28 
  -9   2  -6    8.87    0.25 
  -9   2  -6    8.51    0.23 
  10  -2   6    6.39    0.23 
 -10  -2  -6    6.41    0.23 
 -10  -2  -6    6.49    0.21 
  10   2   6    6.20    0.25 
 -10   2  -6    5.96    0.20 
 -10   2  -6    6.17    0.22 
 -11  -2  -6    3.25    0.18 
  11  -2   6    3.22    0.18 
  11   2   6    3.97    0.18 
  11   2   6    3.85    0.22 
 -11   2  -6    4.18    0.18 
 -11   2  -6    3.97    0.19 
 -12  -2  -6    0.29    0.10 
  12  -2   6    0.15    0.08 
  12   2   6    0.14    0.10 
  12   2   6    0.23    0.08 
 -12   2  -6    0.08    0.09 
 -12   2  -6    0.25    0.08 
  13  -2   6   10.91    0.34 
 -13  -2  -6   11.92    0.35 
 -13   2  -6   14.57    0.38 
  13   2   6   14.56    0.37 
 -13   2  -6   14.67    0.36 
  13   2   6   14.53    0.43 
 -14  -2  -6    6.12    0.27 
  14  -2   6    5.76    0.26 
 -14   2  -6    5.64    0.25 
  14   2   6    5.06    0.28 
 -15  -2  -6   11.58    0.38 
  15  -2   6   10.17    0.36 
  15   2   6   11.13    0.39 
 -15   2  -6   11.18    0.35 
 -16  -2  -6   12.20    0.40 
  16  -2   6   12.01    0.41 
  16   2   6   11.48    0.41 
 -16   2  -6   11.49    0.37 
  17   2   6    2.18    0.24 
 -17   2  -6    2.04    0.22 
 -18   3   6    1.53    0.18 
 -17  -3   6    1.56    0.19 
 -17   3   6    1.91    0.22 
  17   3  -6    1.68    0.20 
 -16  -3   6    0.12    0.11 
  16  -3  -6    0.09    0.10 
  16   3  -6    0.29    0.13 
 -16   3   6    0.04    0.11 
 -15  -3   6    7.28    0.31 
  15  -3  -6    7.85    0.28 
  15   3  -6    7.52    0.31 
 -15   3   6    7.22    0.29 
  14  -3  -6   -0.03    0.08 
 -14  -3   6    0.12    0.10 
 -14   3   6    0.11    0.10 
  14   3  -6   -0.07    0.09 
 -13  -3   6    7.91    0.29 
  13  -3  -6    8.31    0.27 
 -13   3   6    8.15    0.28 
  13   3  -6    7.54    0.29 
 -12  -3   6    4.68    0.22 
  12  -3  -6    4.69    0.20 
  12  -3  -6    4.94    0.22 
 -12   3   6    5.22    0.23 
  12   3  -6    5.15    0.24 
 -11  -3   6    4.54    0.21 
  11  -3  -6    4.87    0.19 
  11  -3  -6    4.30    0.20 
  11   3  -6    5.14    0.23 
 -11   3   6    5.32    0.22 
 -10  -3   6    9.68    0.28 
  10  -3  -6    9.65    0.28 
  10  -3  -6    9.10    0.26 
  10   3  -6    8.34    0.27 
 -10   3   6    8.82    0.27 
  -9  -3   6    3.44    0.17 
   9  -3  -6    4.25    0.18 
   9  -3  -6    3.75    0.16 
  -9   3   6    4.10    0.18 
   9   3  -6    3.93    0.19 
   8  -3  -6    4.55    0.17 
  -8  -3   6    4.41    0.14 
   8  -3  -6    4.33    0.17 
  -8  -3   6    4.34    0.17 
   8   3  -6    4.73    0.19 
  -8   3   6    4.68    0.18 
   7  -3  -6   17.34    0.36 
  -7  -3   6   17.89    0.33 
   7  -3  -6   18.01    0.38 
  -7  -3   6   17.76    0.37 
  -7   3   6   17.02    0.36 
   7   3  -6   17.33    0.37 
  -6  -3   6    5.97    0.19 
   6  -3  -6    6.02    0.18 
   6  -3  -6    5.56    0.18 
  -6  -3   6    6.03    0.16 
   6   3  -6    5.97    0.19 
  -6   3   6    5.91    0.19 
   6   3  -6    6.02    0.16 
  -5  -3   6   16.15    0.31 
  -5  -3   6   15.72    0.33 
   5  -3  -6   15.66    0.32 
   5  -3  -6   16.46    0.34 
  -5   3   6   16.75    0.34 
   5   3  -6   16.75    0.34 
   5   3  -6   17.26    0.31 
   4  -3  -6   19.51    0.37 
   4  -3  -6   19.38    0.38 
  -4  -3   6   19.00    0.35 
  -4  -3   6   19.25    0.37 
  -4   3   6   22.20    0.41 
   4   3  -6   22.42    0.37 
   4   3  -6   22.42    0.41 
   3  -3  -6    5.31    0.17 
  -3  -3   6    5.16    0.16 
  -3  -3   6    4.95    0.15 
   3  -3  -6    5.51    0.16 
  -3  -3   6    5.17    0.13 
  -3   3   6    4.09    0.14 
   3   3  -6    4.10    0.14 
   2  -3  -6   11.51    0.26 
  -2  -3   6   12.05    0.27 
   2  -3  -6   11.71    0.26 
  -2  -3   6   12.03    0.23 
  -2  -3   6   12.07    0.25 
   2   3  -6   12.03    0.24 
  -2   3   6   12.00    0.25 
  -1  -3   6   26.73    0.43 
   1  -3  -6   26.72    0.38 
  -1  -3   6   26.11    0.45 
  -1  -3   6   26.58    0.47 
   1  -3  -6   25.54    0.47 
  -1   3   6   28.03    0.49 
   1   3  -6   28.20    0.46 
  -1   3   6   28.90    0.47 
   0  -3  -6    4.67    0.10 
   0  -3   6    4.44    0.13 
   0  -3   6    4.52    0.15 
   0  -3  -6    4.57    0.16 
   0   3  -6    3.48    0.11 
   0   3   6    3.22    0.11 
   0   3  -6    3.41    0.13 
   0   3   6    3.35    0.13 
   1  -3   6   18.20    0.35 
  -1  -3  -6   18.47    0.30 
  -1  -3  -6   18.62    0.36 
   1  -3   6   18.18    0.33 
   1   3   6   16.22    0.28 
  -1   3  -6   16.04    0.27 
  -1   3  -6   15.56    0.32 
   2  -3   6    4.80    0.14 
   2  -3   6    4.89    0.16 
  -2  -3  -6    4.56    0.16 
  -2  -3  -6    4.43    0.12 
   2   3   6    4.07    0.11 
  -2   3  -6    4.19    0.15 
   2   3   6    3.96    0.15 
  -2   3  -6    4.39    0.10 
   3  -3   6   23.30    0.42 
  -3  -3  -6   22.72    0.43 
   3  -3   6   23.54    0.43 
  -3  -3  -6   22.39    0.39 
  -3   3  -6   25.15    0.47 
   3   3   6   26.60    0.40 
   3   3   6   25.43    0.49 
  -3   3  -6   26.84    0.42 
  -4  -3  -6   25.97    0.48 
   4  -3   6   26.51    0.47 
  -4  -3  -6   26.67    0.45 
   4  -3   6   27.16    0.48 
   4   3   6   25.64    0.49 
  -4   3  -6   25.23    0.47 
   5  -3   6    0.68    0.08 
   5  -3   6    0.71    0.08 
  -5  -3  -6    0.50    0.07 
  -5  -3  -6    0.59    0.08 
  -5   3  -6    0.27    0.07 
   5   3   6    0.26    0.07 
   6  -3   6   17.25    0.36 
  -6  -3  -6   16.91    0.36 
   6  -3   6   17.39    0.37 
  -6  -3  -6   17.24    0.35 
   6   3   6   16.47    0.39 
  -6   3  -6   16.17    0.35 
   7  -3   6    4.95    0.19 
  -7  -3  -6    4.91    0.19 
  -7  -3  -6    4.89    0.18 
   7   3   6    5.85    0.23 
  -7   3  -6    6.37    0.21 
  -7   3  -6    6.27    0.20 
   8  -3   6    0.67    0.10 
  -8  -3  -6    0.59    0.09 
  -8  -3  -6    0.65    0.09 
  -8   3  -6    0.76    0.10 
   8   3   6    0.88    0.12 
  -8   3  -6    1.01    0.11 
   9  -3   6    8.57    0.27 
  -9  -3  -6    8.98    0.26 
  -9  -3  -6    9.03    0.27 
  -9   3  -6   10.74    0.29 
  -9   3  -6   10.86    0.29 
   9   3   6   10.15    0.32 
 -10  -3  -6    1.43    0.14 
 -10  -3  -6    1.58    0.15 
  10  -3   6    1.24    0.14 
 -10   3  -6    1.45    0.14 
  10   3   6    1.74    0.17 
 -10   3  -6    1.77    0.15 
 -11  -3  -6    4.91    0.22 
 -11  -3  -6    5.51    0.22 
  11  -3   6    5.27    0.24 
 -11   3  -6    4.23    0.20 
  11   3   6    4.78    0.25 
 -11   3  -6    4.66    0.21 
 -12  -3  -6    9.06    0.30 
  12  -3   6    8.67    0.31 
 -12   3  -6    8.29    0.28 
  12   3   6    7.90    0.28 
  12   3   6    8.15    0.33 
 -12   3  -6    8.54    0.28 
 -13  -3  -6    0.13    0.10 
  13  -3   6    0.07    0.09 
  13   3   6    0.23    0.10 
  13   3   6    0.11    0.11 
 -13   3  -6    0.17    0.10 
 -13   3  -6    0.24    0.10 
 -14  -3  -6    7.80    0.31 
  14  -3   6    8.19    0.33 
 -14   3  -6    7.35    0.28 
  14   3   6    7.92    0.34 
  14   3   6    7.89    0.30 
 -15  -3  -6    4.70    0.27 
  15  -3   6    4.62    0.26 
  15   3   6    5.26    0.30 
 -15   3  -6    5.92    0.27 
  16   3   6    1.90    0.21 
  16  -4  -6    2.34    0.22 
 -16   4   6    2.61    0.24 
  16   4  -6    1.81    0.27 
  15  -4  -6    0.08    0.10 
 -15  -4   6    0.12    0.12 
  15   4  -6    0.10    0.12 
 -15   4   6   -0.09    0.11 
  14  -4  -6    2.28    0.20 
 -14  -4   6    2.16    0.21 
  14   4  -6    2.11    0.22 
 -14   4   6    2.23    0.21 
  13  -4  -6    1.52    0.18 
 -13  -4   6    1.35    0.16 
 -13   4   6    1.26    0.15 
  13   4  -6    1.21    0.15 
  12  -4  -6    2.14    0.17 
 -12  -4   6    1.80    0.19 
 -12   4   6    2.05    0.18 
  12   4  -6    2.15    0.19 
  11  -4  -6    0.58    0.15 
 -11  -4   6    0.61    0.11 
  11  -4  -6    0.48    0.10 
  11   4  -6    1.24    0.14 
 -11   4   6    1.22    0.14 
  10  -4  -6    3.15    0.17 
 -10  -4   6    2.81    0.19 
  10  -4  -6    2.94    0.17 
  10   4  -6    5.18    0.24 
 -10   4   6    4.87    0.22 
  -9  -4   6    2.09    0.16 
   9  -4  -6    2.28    0.15 
   9  -4  -6    2.23    0.16 
  -9   4   6    1.63    0.14 
   9   4  -6    1.72    0.16 
  -8  -4   6    6.46    0.23 
   8  -4  -6    6.16    0.22 
   8  -4  -6    6.55    0.22 
   8   4  -6    7.83    0.26 
  -8   4   6    8.17    0.26 
   7  -4  -6    2.41    0.14 
  -7  -4   6    2.15    0.15 
   7  -4  -6    2.33    0.15 
   7   4  -6    1.98    0.14 
  -7   4   6    1.88    0.14 
   6  -4  -6   24.79    0.48 
  -6  -4   6   25.23    0.44 
  -6  -4   6   23.60    0.48 
   6  -4  -6   24.67    0.48 
  -6   4   6   19.98    0.41 
   6   4  -6   19.56    0.41 
  -5  -4   6    3.80    0.17 
   5  -4  -6    3.64    0.16 
  -5  -4   6    3.49    0.13 
   5  -4  -6    3.46    0.16 
  -5   4   6    3.82    0.16 
   5   4  -6    4.05    0.15 
   5   4  -6    3.90    0.17 
   4  -4  -6   20.73    0.42 
  -4  -4   6   20.89    0.39 
   4  -4  -6   21.10    0.42 
  -4  -4   6   21.16    0.42 
   4   4  -6   20.83    0.38 
  -4   4   6   20.52    0.40 
   4   4  -6   20.21    0.40 
  -3  -4   6    7.45    0.22 
   3  -4  -6    7.52    0.22 
   3  -4  -6    7.34    0.22 
  -3  -4   6    7.51    0.19 
  -3  -4   6    7.61    0.20 
  -3   4   6    7.40    0.21 
   3   4  -6    7.23    0.20 
  -2  -4   6   18.88    0.37 
   2  -4  -6   18.62    0.39 
  -2  -4   6   18.79    0.39 
   2  -4  -6   19.78    0.40 
  -2  -4   6   18.99    0.36 
  -2   4   6   20.68    0.39 
   2   4  -6   20.10    0.38 
  -1  -4   6    4.34    0.16 
   1  -4  -6    4.81    0.18 
  -1  -4   6    4.29    0.15 
  -1  -4   6    4.45    0.17 
   1   4  -6    5.97    0.17 
  -1   4   6    5.73    0.17 
  -1   4   6    5.47    0.19 
   0  -4   6    2.90    0.13 
   0  -4   6    2.98    0.11 
   0  -4   6    2.89    0.14 
   0  -4  -6    2.79    0.15 
   0   4  -6    4.42    0.17 
   0   4   6    4.33    0.14 
   0   4   6    4.36    0.18 
  -1  -4  -6    9.55    0.26 
   1  -4   6    9.66    0.21 
   1  -4   6    9.67    0.25 
   1  -4   6    9.50    0.24 
   1   4   6   10.55    0.28 
  -1   4  -6   10.43    0.27 
   1   4   6   10.75    0.23 
  -2  -4  -6   28.35    0.54 
   2  -4   6   29.47    0.47 
   2  -4   6   29.06    0.53 
   2  -4   6   28.81    0.52 
  -2  -4  -6   29.29    0.47 
   2   4   6   31.60    0.58 
  -2   4  -6   31.07    0.57 
  -3  -4  -6   10.65    0.29 
   3  -4   6   10.59    0.27 
  -3  -4  -6   10.76    0.24 
   3  -4   6   10.69    0.27 
   3   4   6   12.74    0.32 
  -3   4  -6   11.99    0.30 
  -4  -4  -6    8.23    0.25 
  -4  -4  -6    8.42    0.21 
   4  -4   6    8.26    0.24 
   4  -4   6    8.26    0.25 
   4   4   6    6.43    0.23 
  -4   4  -6    6.50    0.21 
  -5  -4  -6   15.65    0.36 
  -5  -4  -6   15.73    0.33 
   5  -4   6   15.45    0.36 
   5  -4   6   14.92    0.35 
   5   4   6   17.48    0.42 
  -5   4  -6   17.60    0.38 
  -6  -4  -6    7.02    0.24 
   6  -4   6    6.50    0.23 
  -6  -4  -6    6.80    0.21 
  -6   4  -6    5.71    0.22 
  -6   4  -6    5.79    0.21 
   6   4   6    5.93    0.24 
  -7  -4  -6   12.98    0.34 
   7  -4   6   13.51    0.34 
  -7  -4  -6   12.60    0.31 
   7   4   6   12.95    0.37 
  -7   4  -6   12.88    0.32 
  -7   4  -6   12.55    0.33 
  -8  -4  -6    7.79    0.25 
   8  -4   6    8.19    0.27 
  -8  -4  -6    8.29    0.27 
  -8   4  -6    8.91    0.27 
  -8   4  -6    8.95    0.28 
   8   4   6    8.96    0.32 
  -9  -4  -6    0.25    0.09 
  -9  -4  -6    0.18    0.09 
   9  -4   6    0.16    0.09 
  -9   4  -6    0.18    0.08 
  -9   4  -6    0.08    0.09 
   9   4   6    0.08    0.09 
  10  -4   6    3.13    0.21 
 -10  -4  -6    2.96    0.18 
 -10  -4  -6    3.37    0.21 
  10   4   6    3.03    0.22 
 -10   4  -6    2.58    0.19 
  11  -4   6    4.04    0.23 
 -11  -4  -6    3.71    0.22 
 -11  -4  -6    3.65    0.21 
 -11   4  -6    4.05    0.23 
  11   4   6    3.70    0.24 
 -12  -4  -6    0.17    0.10 
 -12  -4  -6    0.20    0.11 
  12  -4   6    0.29    0.11 
 -12   4  -6    0.28    0.12 
  12   4   6    0.17    0.12 
 -13  -4  -6    0.80    0.14 
  13  -4   6    0.71    0.13 
 -13   4  -6    0.26    0.12 
  13   4   6    0.41    0.14 
  13   4   6    0.45    0.12 
  14  -4   6    0.16    0.12 
 -14  -4  -6    0.40    0.13 
 -14   4  -6    0.14    0.12 
  14   4   6    0.25    0.12 
  14   4   6    0.31    0.13 
 -15   4  -6    4.07    0.26 
  15   4   6    4.01    0.26 
  15   4   6    3.41    0.26 
 -14  -5   6    0.37    0.15 
  14  -5  -6    0.13    0.12 
 -14   5   6    0.16    0.15 
 -13  -5   6    0.79    0.15 
  13  -5  -6    0.63    0.13 
 -13   5   6    0.96    0.16 
  13   5  -6    1.09    0.16 
 -12  -5   6    1.31    0.16 
  12  -5  -6    1.72    0.20 
 -12   5   6    1.12    0.16 
  12   5  -6    1.10    0.16 
 -11  -5   6    3.23    0.22 
  11  -5  -6    3.14    0.20 
  11   5  -6    2.60    0.22 
 -11   5   6    1.98    0.19 
 -10  -5   6    3.67    0.22 
  10  -5  -6    3.22    0.21 
 -10   5   6    3.06    0.21 
  10   5  -6    2.81    0.21 
   9  -5  -6   10.75    0.33 
   9  -5  -6   11.02    0.33 
  -9  -5   6    9.45    0.31 
   9   5  -6   10.37    0.33 
  -9   5   6   10.42    0.32 
  -8  -5   6    1.41    0.15 
   8  -5  -6    1.58    0.15 
   8  -5  -6    1.27    0.15 
   8   5  -6    1.44    0.17 
  -8   5   6    1.08    0.13 
   7  -5  -6    9.00    0.27 
  -7  -5   6    8.84    0.29 
   7  -5  -6    8.65    0.28 
  -7   5   6    8.47    0.28 
   7   5  -6    8.80    0.29 
  -6  -5   6    0.72    0.10 
   6  -5  -6    0.90    0.12 
   6  -5  -6    0.90    0.11 
  -6   5   6    0.50    0.10 
   6   5  -6    0.63    0.11 
   5  -5  -6    6.56    0.25 
  -5  -5   6    6.32    0.23 
   5  -5  -6    7.00    0.24 
   5   5  -6    6.01    0.22 
  -5   5   6    5.68    0.22 
   4  -5  -6    6.26    0.23 
   4  -5  -6    6.36    0.23 
  -4  -5   6    6.22    0.20 
  -4  -5   6    6.01    0.22 
   4   5  -6    4.89    0.20 
  -4   5   6    5.07    0.20 
  -3  -5   6    5.71    0.21 
   3  -5  -6    5.89    0.23 
   3  -5  -6    5.37    0.21 
  -3  -5   6    5.60    0.19 
   3   5  -6    3.81    0.17 
  -3   5   6    4.07    0.17 
   3   5  -6    4.15    0.17 
  -2  -5   6   10.35    0.27 
  -2  -5   6    9.55    0.26 
   2  -5  -6   10.57    0.29 
  -2  -5   6   10.47    0.29 
   2  -5  -6   10.19    0.29 
   2   5  -6   10.93    0.27 
  -2   5   6   10.72    0.27 
   1  -5  -6    8.50    0.27 
  -1  -5   6    9.33    0.24 
  -1  -5   6    9.07    0.25 
  -1  -5   6    9.10    0.25 
  -1   5   6    9.12    0.24 
  -1   5   6    9.57    0.28 
   1   5  -6    9.12    0.27 
   0  -5  -6    7.29    0.25 
   0  -5   6    7.02    0.22 
   0  -5   6    7.63    0.21 
   0  -5   6    7.20    0.23 
   0   5   6    6.01    0.24 
   0   5  -6    6.21    0.22 
   1  -5   6    1.46    0.13 
  -1  -5  -6    1.43    0.14 
   1  -5   6    1.48    0.13 
   1   5   6    2.13    0.16 
  -1   5  -6    2.15    0.15 
  -2  -5  -6    6.60    0.24 
   2  -5   6    6.52    0.23 
   2  -5   6    6.39    0.22 
   2   5   6    6.63    0.25 
  -2   5  -6    6.72    0.23 
   3  -5   6    0.78    0.11 
   3  -5   6    0.48    0.09 
  -3  -5  -6    0.50    0.10 
  -3   5  -6    0.19    0.08 
   3   5   6    0.21    0.09 
  -3   5  -6    0.22    0.08 
  -4  -5  -6    0.56    0.11 
   4  -5   6    0.71    0.11 
  -4   5  -6   -0.01    0.07 
  -4   5  -6    0.04    0.11 
   4   5   6    0.03    0.08 
  -5  -5  -6    5.96    0.24 
   5  -5   6    6.27    0.24 
  -5   5  -6    7.34    0.26 
   5   5   6    7.49    0.28 
  -6  -5  -6   11.76    0.34 
   6  -5   6   11.99    0.34 
  -6  -5  -6   11.60    0.38 
  -6   5  -6   11.41    0.33 
   6   5   6   11.65    0.36 
   7  -5   6    5.89    0.25 
  -7  -5  -6    5.28    0.21 
  -7  -5  -6    5.35    0.25 
   7   5   6    4.99    0.26 
  -7   5  -6    4.80    0.23 
  -8  -5  -6    3.36    0.22 
   8  -5   6    3.76    0.21 
  -8  -5  -6    3.54    0.19 
  -8   5  -6    4.01    0.22 
   8   5   6    3.95    0.24 
  -9  -5  -6    3.77    0.23 
   9  -5   6    3.72    0.23 
  -9  -5  -6    3.88    0.21 
  -9   5  -6    5.07    0.25 
   9   5   6    5.24    0.28 
 -10  -5  -6    0.57    0.13 
  10  -5   6    0.43    0.12 
 -10  -5  -6    0.60    0.12 
 -10   5  -6    0.33    0.12 
  10   5   6    0.41    0.13 
 -11  -5  -6    2.55    0.20 
  11  -5   6    2.61    0.22 
 -11  -5  -6    2.82    0.23 
 -11   5  -6    2.73    0.23 
  11   5   6    2.15    0.23 
  12  -5   6    0.30    0.13 
 -12  -5  -6    0.41    0.13 
 -12  -5  -6    0.31    0.13 
  12   5   6    0.25    0.13 
 -12   5  -6    0.84    0.16 
 -13  -5  -6    1.02    0.16 
  13   5   6    0.99    0.18 
  13   5   6    0.91    0.16 
  11  -6  -6    2.03    0.21 
 -11  -6   6    2.59    0.23 
 -11   6   6    2.41    0.22 
  11   6  -6    2.75    0.24 
  10  -6  -6    0.38    0.12 
 -10  -6   6    0.55    0.13 
 -10   6   6    0.82    0.15 
  10   6  -6    0.77    0.15 
  -9  -6   6    1.06    0.15 
   9  -6  -6    1.13    0.16 
   9   6  -6    1.54    0.18 
  -9   6   6    1.21    0.16 
   8  -6  -6    6.92    0.29 
  -8  -6   6    6.40    0.28 
  -8   6   6    7.06    0.29 
   8   6  -6    6.53    0.29 
   7  -6  -6    0.05    0.09 
  -7  -6   6    0.24    0.10 
   7  -6  -6    0.05    0.10 
  -7   6   6    0.00    0.09 
   7   6  -6    0.05    0.10 
  -6  -6   6    9.61    0.32 
   6  -6  -6    9.85    0.33 
   6  -6  -6    9.85    0.31 
  -6   6   6    9.44    0.31 
   6   6  -6   10.71    0.33 
   5  -6  -6    0.85    0.13 
  -5  -6   6    0.73    0.12 
   5  -6  -6    0.92    0.12 
   5   6  -6    0.73    0.12 
  -5   6   6    0.63    0.11 
  -4  -6   6    2.37    0.17 
   4  -6  -6    2.44    0.19 
   4  -6  -6    2.59    0.19 
  -4   6   6    3.18    0.18 
   4   6  -6    3.17    0.20 
  -3  -6   6    0.92    0.12 
   3  -6  -6    1.02    0.13 
   3  -6  -6    1.02    0.13 
  -3   6   6    0.60    0.10 
   3   6  -6    0.74    0.11 
   2  -6  -6    6.38    0.26 
  -2  -6   6    6.36    0.23 
   2   6  -6    6.36    0.25 
  -2   6   6    6.12    0.26 
  -1  -6   6    1.75    0.15 
  -1  -6   6    1.49    0.15 
   1  -6  -6    1.44    0.15 
  -1   6   6    1.03    0.14 
   1   6  -6    1.49    0.15 
   0  -6   6    1.56    0.15 
   0  -6  -6    1.18    0.14 
   0   6   6    1.18    0.14 
   0   6  -6    1.36    0.14 
   1  -6   6    1.02    0.13 
  -1  -6  -6    0.95    0.13 
  -1   6  -6    0.72    0.11 
   1   6   6    0.79    0.13 
  -2  -6  -6    0.77    0.13 
   2  -6   6    0.45    0.11 
   2   6   6    1.04    0.14 
  -2   6  -6    1.17    0.13 
   3  -6   6    9.98    0.32 
  -3  -6  -6    9.91    0.33 
  -3   6  -6    8.64    0.29 
   3   6   6    8.80    0.32 
  -4  -6  -6    4.33    0.24 
   4  -6   6    4.43    0.23 
   4   6   6    3.68    0.24 
  -4   6  -6    3.38    0.21 
   5  -6   6    7.10    0.29 
  -5  -6  -6    7.54    0.30 
   5   6   6    9.63    0.36 
  -5   6  -6   10.28    0.33 
  -6  -6  -6    3.42    0.24 
   6  -6   6    3.06    0.21 
   6   6   6    3.81    0.24 
  -6   6  -6    3.33    0.23 
   7  -6   6    3.81    0.23 
  -7  -6  -6    3.77    0.25 
   7   6   6    3.41    0.25 
  -7   6  -6    3.51    0.23 
  -8  -6  -6    1.81    0.21 
   8  -6   6    2.33    0.23 
   8   6   6    2.16    0.22 
  -8   6  -6    1.85    0.20 
   9  -6   6    0.60    0.14 
  -9  -6  -6    0.66    0.14 
   9   6   6    0.42    0.15 
  -9   6  -6    0.53    0.14 
  10  -6   6    1.72    0.20 
  10   6   6    1.49    0.19 
  11   6   6    0.20    0.14 
  -9  -7   6    4.36    0.28 
  -8  -7   6    3.23    0.25 
  -8   7   6    2.18    0.27 
   8   7  -6    2.79    0.28 
  -7  -7   6    2.44    0.28 
  -7   7   6    1.92    0.21 
   7   7  -6    1.83    0.21 
   6  -7  -6    0.45    0.14 
  -6   7   6    0.52    0.13 
   6   7  -6    0.32    0.13 
   5  -7  -6    2.12    0.22 
   5   7  -6    1.94    0.20 
  -5   7   6    1.95    0.19 
   4  -7  -6    0.01    0.10 
   4  -7  -6    0.28    0.13 
  -4   7   6    0.25    0.12 
   3  -7  -6    1.16    0.16 
  -3   7   6    0.36    0.12 
   2  -7  -6    1.03    0.15 
  -2   7   6    0.93    0.15 
   1  -7  -6    0.37    0.12 
  -1   7   6    0.59    0.14 
   0  -7  -6    0.13    0.11 
   0  -7   6   -0.06    0.13 
   0   7   6    0.18    0.12 
   1  -7   6    0.31    0.11 
  -1  -7  -6    0.35    0.12 
  -1   7  -6    0.10    0.11 
   1   7   6    0.44    0.13 
  -2  -7  -6    1.70    0.20 
   2  -7   6    2.03    0.20 
  -2   7  -6    1.53    0.17 
   2   7   6    1.50    0.18 
  -3  -7  -6    0.50    0.14 
   3  -7   6    0.52    0.12 
   3   7   6    0.56    0.14 
  -3   7  -6    0.31    0.12 
   4  -7   6    2.57    0.21 
  -4  -7  -6    2.54    0.24 
  -4   7  -6    2.19    0.21 
   4   7   6    2.77    0.24 
   5  -7   6    3.90    0.25 
  -5  -7  -6    3.12    0.25 
   5   7   6    3.92    0.29 
  -5   7  -6    3.65    0.25 
   6  -7   6    1.75    0.19 
   6   7   6    1.99    0.23 
  18   0  -7    0.75    0.15 
 -17   0   7    1.69    0.18 
  17   0  -7    1.55    0.18 
 -16   0   7    0.11    0.09 
  16   0  -7    0.24    0.11 
  15   0  -7    3.92    0.22 
 -15   0   7    3.27    0.19 
 -14   0   7    0.02    0.07 
  14   0  -7    0.09    0.08 
 -14   0   7   -0.04    0.06 
 -13   0   7    0.09    0.06 
  13   0  -7    0.04    0.07 
 -13   0   7    0.05    0.07 
  12   0  -7    6.14    0.23 
 -12   0   7    6.84    0.22 
 -12   0   7    6.16    0.20 
 -11   0   7   40.99    0.68 
  11   0  -7   41.08    0.66 
 -11   0   7   41.64    0.70 
  11   0  -7   42.05    0.73 
 -10   0   7    1.33    0.10 
  10   0  -7    1.19    0.12 
  10   0  -7    1.33    0.08 
 -10   0   7    1.21    0.10 
   9   0  -7   83.41    1.27 
  -9   0   7   81.95    1.24 
  -9   0   7   84.81    1.22 
   9   0  -7   84.78    1.18 
   8   0  -7   10.40    0.26 
  -8   0   7   10.48    0.22 
  -8   0   7   10.26    0.24 
   8   0  -7   10.37    0.19 
   7   0  -7   29.78    0.52 
  -7   0   7   29.51    0.48 
  -7   0   7   29.79    0.51 
   7   0  -7   29.37    0.44 
   6   0  -7    0.37    0.04 
   6   0  -7    0.30    0.05 
  -6   0   7    0.33    0.04 
  -6   0   7    0.47    0.06 
   5   0  -7   61.74    0.94 
  -5   0   7   63.35    0.90 
  -5   0   7   61.10    0.93 
   5   0  -7   63.38    0.86 
  -4   0   7   55.66    0.84 
  -4   0   7   55.97    0.80 
   4   0  -7   54.60    0.84 
   4   0  -7   55.73    0.76 
  -3   0   7    1.52    0.04 
  -3   0   7    1.43    0.06 
   3   0  -7    1.63    0.08 
  -3   0   7    1.40    0.08 
  -2   0   7    0.69    0.06 
   2   0  -7    0.75    0.06 
   2   0  -7    0.79    0.05 
  -2   0   7    0.78    0.04 
   1   0  -7    0.16    0.04 
   1   0  -7    0.17    0.03 
  -1   0   7    0.19    0.04 
  -1   0   7    0.20    0.03 
   0   0   7    3.73    0.11 
   0   0   7    3.34    0.10 
   0   0  -7    3.47    0.10 
   0   0  -7    3.55    0.11 
  -1   0  -7    2.71    0.09 
  -1   0  -7    2.57    0.08 
   1   0   7    2.69    0.09 
   1   0   7    2.50    0.09 
  -2   0  -7   34.05    0.54 
  -2   0  -7   33.81    0.50 
   2   0   7   33.24    0.54 
   2   0   7   34.48    0.52 
  -3   0  -7   12.31    0.21 
  -3   0  -7   12.37    0.25 
   3   0   7   12.09    0.26 
   3   0   7   11.99    0.22 
  -4   0  -7  100.24    1.35 
   4   0   7   95.50    1.43 
   4   0   7   98.26    1.37 
  -4   0  -7   99.03    1.41 
   5   0   7   23.08    0.38 
   5   0   7   23.25    0.44 
  -5   0  -7   23.10    0.42 
  -5   0  -7   23.44    0.36 
   6   0   7    8.00    0.17 
   6   0   7    7.69    0.22 
  -6   0  -7    8.00    0.21 
  -6   0  -7    7.93    0.16 
   7   0   7   54.83    0.91 
  -7   0  -7   56.28    0.89 
   7   0   7   57.13    0.83 
  -7   0  -7   56.42    0.81 
  -8   0  -7   11.67    0.28 
   8   0   7   11.62    0.22 
   8   0   7   11.14    0.30 
   8   0   7   11.18    0.23 
   9   0   7   28.06    0.56 
  -9   0  -7   28.76    0.47 
  -9   0  -7   28.25    0.53 
 -10   0  -7    6.97    0.24 
  10   0   7    7.14    0.26 
  11   0   7    1.55    0.15 
 -11   0  -7    1.59    0.14 
 -12   0  -7    0.68    0.11 
  12   0   7    0.59    0.11 
 -13   0  -7   -0.03    0.09 
  13   0   7    0.10    0.09 
 -14   0  -7    0.10    0.10 
  14   0   7   -0.02    0.09 
 -15   0  -7    0.58    0.13 
  15   0   7    0.51    0.13 
  16   0   7    0.10    0.11 
 -16   0  -7    0.12    0.12 
  17   0   7    0.11    0.12 
 -17   0  -7   -0.09    0.12 
 -19  -1   7    2.66    0.24 
  19   1  -7    1.71    0.21 
 -18  -1   7    1.24    0.16 
  18   1  -7    1.41    0.18 
 -17  -1   7    1.20    0.15 
  17   1  -7    1.61    0.19 
  16  -1  -7    2.78    0.21 
 -16  -1   7    2.70    0.20 
  16   1  -7    2.34    0.21 
 -16   1   7    1.91    0.17 
 -15  -1   7    1.52    0.16 
  15  -1  -7    1.63    0.17 
  15   1  -7    1.39    0.15 
 -15   1   7    1.31    0.15 
 -14  -1   7    1.45    0.15 
  14  -1  -7    1.65    0.17 
  14   1  -7    1.02    0.13 
 -14   1   7    1.19    0.14 
  13  -1  -7    8.17    0.26 
 -13  -1   7    8.43    0.26 
  13  -1  -7    7.87    0.28 
 -13   1   7    7.96    0.29 
  13   1  -7    8.43    0.28 
 -13   1   7    8.05    0.26 
  12  -1  -7   16.35    0.40 
 -12  -1   7   16.52    0.37 
 -12  -1   7   16.50    0.36 
  12  -1  -7   16.55    0.33 
 -12   1   7   18.54    0.40 
  12   1  -7   18.73    0.43 
 -12   1   7   18.71    0.37 
  11  -1  -7    4.09    0.14 
 -11  -1   7    3.81    0.17 
  11  -1  -7    3.81    0.19 
 -11  -1   7    4.14    0.16 
 -11   1   7    3.38    0.15 
  11   1  -7    3.05    0.17 
 -11   1   7    3.18    0.13 
 -10  -1   7   15.49    0.34 
 -10  -1   7   15.88    0.34 
  10  -1  -7   15.87    0.31 
  10  -1  -7   15.87    0.37 
 -10   1   7   14.19    0.32 
  10   1  -7   14.01    0.34 
 -10   1   7   14.61    0.28 
   9  -1  -7    1.52    0.08 
   9  -1  -7    1.61    0.12 
  -9  -1   7    1.54    0.10 
  -9  -1   7    1.43    0.10 
  -9   1   7    1.48    0.11 
   9   1  -7    1.80    0.12 
  -9   1   7    1.54    0.09 
  -8  -1   7   20.75    0.40 
  -8  -1   7   20.71    0.39 
   8  -1  -7   20.93    0.42 
   8  -1  -7   20.59    0.35 
  -8   1   7   20.70    0.40 
   8   1  -7   19.91    0.40 
   8   1  -7   21.10    0.32 
  -8   1   7   20.56    0.35 
  -7  -1   7   27.36    0.48 
   7  -1  -7   27.57    0.44 
  -7  -1   7   27.86    0.47 
   7  -1  -7   27.12    0.50 
   7   1  -7   26.65    0.48 
  -7   1   7   27.10    0.42 
  -7   1   7   26.25    0.47 
   7   1  -7   27.32    0.39 
  -6  -1   7   19.72    0.37 
   6  -1  -7   19.93    0.33 
  -6  -1   7   19.46    0.35 
   6  -1  -7   19.92    0.39 
  -6   1   7   24.55    0.38 
   6   1  -7   24.29    0.34 
  -6   1   7   24.00    0.43 
   6   1  -7   23.77    0.43 
   5  -1  -7   15.39    0.26 
  -5  -1   7   15.25    0.31 
   5  -1  -7   15.20    0.32 
  -5  -1   7   14.75    0.28 
   5   1  -7   14.59    0.29 
  -5   1   7   15.27    0.25 
   4  -1  -7    3.08    0.12 
  -4  -1   7    3.31    0.12 
   4  -1  -7    3.14    0.09 
  -4  -1   7    2.99    0.10 
   4   1  -7    1.52    0.08 
  -4   1   7    1.53    0.06 
  -4   1   7    1.51    0.08 
   3  -1  -7    3.43    0.08 
  -3  -1   7    3.38    0.11 
  -3  -1   7    3.29    0.12 
   3  -1  -7    3.28    0.09 
   3   1  -7    2.92    0.10 
  -3   1   7    2.89    0.10 
  -2  -1   7    7.25    0.17 
  -2  -1   7    7.26    0.18 
   2  -1  -7    7.30    0.14 
  -2  -1   7    7.25    0.11 
  -2   1   7    8.43    0.19 
   2   1  -7    8.64    0.18 
  -2   1   7    8.42    0.17 
  -1  -1   7    5.23    0.10 
   1  -1  -7    5.29    0.14 
   1  -1  -7    5.38    0.12 
   1   1  -7    5.17    0.14 
  -1   1   7    5.34    0.14 
  -1   1   7    5.17    0.12 
   1   1  -7    5.28    0.13 
   0  -1  -7    2.58    0.09 
   0  -1  -7    2.76    0.08 
   0  -1   7    2.83    0.08 
   0  -1   7    2.79    0.10 
   0   1   7    3.73    0.11 
   0   1  -7    3.52    0.09 
   0   1  -7    3.57    0.12 
   0   1   7    3.51    0.11 
  -1  -1  -7   13.25    0.24 
   1  -1   7   12.85    0.23 
  -1  -1  -7   12.78    0.23 
   1  -1   7   12.40    0.24 
   1   1   7   15.12    0.29 
   1   1   7   15.08    0.27 
  -1   1  -7   15.21    0.25 
  -1   1  -7   14.99    0.29 
  -2  -1  -7    0.06    0.03 
   2  -1   7    0.03    0.03 
   2  -1   7    0.01    0.03 
  -2  -1  -7   -0.01    0.03 
   2   1   7    0.33    0.05 
  -2   1  -7    0.25    0.03 
  -2   1  -7    0.23    0.05 
   2   1   7    0.27    0.04 
  -3  -1  -7   24.87    0.42 
  -3  -1  -7   24.85    0.40 
   3  -1   7   25.25    0.43 
   3  -1   7   25.06    0.41 
  -3   1  -7   27.68    0.48 
   3   1   7   27.95    0.49 
   3   1   7   27.79    0.43 
   4  -1   7   35.63    0.58 
   4  -1   7   35.13    0.56 
  -4  -1  -7   35.32    0.55 
  -4  -1  -7   35.44    0.57 
  -4   1  -7   33.95    0.57 
   4   1   7   34.42    0.59 
   4   1   7   34.70    0.51 
   5  -1   7   13.15    0.26 
  -5  -1  -7   13.64    0.28 
   5  -1   7   13.62    0.29 
  -5  -1  -7   13.11    0.25 
   5   1   7   13.13    0.30 
   5   1   7   13.22    0.22 
  -5   1  -7   13.04    0.28 
  -6  -1  -7   38.21    0.63 
   6  -1   7   38.14    0.60 
   6  -1   7   38.16    0.65 
  -6  -1  -7   38.59    0.60 
  -6   1  -7   38.23    0.64 
   6   1   7   38.43    0.56 
   6   1   7   37.82    0.67 
  -7  -1  -7    5.97    0.19 
   7  -1   7    5.84    0.19 
  -7  -1  -7    5.66    0.16 
   7  -1   7    5.78    0.16 
   7   1   7    5.50    0.20 
  -7   1  -7    5.12    0.18 
   8  -1   7   43.81    0.75 
   8  -1   7   44.01    0.69 
  -8  -1  -7   43.90    0.68 
  -8  -1  -7   43.45    0.73 
  -8   1  -7   42.77    0.73 
   8   1   7   44.05    0.78 
  -9  -1  -7    0.33    0.06 
  -9  -1  -7    0.31    0.08 
   9  -1   7    0.47    0.09 
  -9   1  -7    0.63    0.09 
  -9   1  -7    0.83    0.09 
   9   1   7    0.59    0.10 
  10  -1   7    9.61    0.29 
 -10  -1  -7   10.00    0.28 
 -10   1  -7   10.37    0.29 
 -10   1  -7   10.57    0.25 
  10   1   7   10.89    0.25 
  10   1   7   10.38    0.32 
 -11  -1  -7    4.67    0.21 
  11  -1   7    5.37    0.22 
  11   1   7    6.77    0.27 
 -11   1  -7    6.92    0.25 
 -11   1  -7    6.64    0.21 
  12  -1   7    6.13    0.25 
 -12  -1  -7    5.78    0.24 
 -12   1  -7    5.89    0.24 
  12   1   7    6.32    0.27 
 -13  -1  -7    1.03    0.13 
  13  -1   7    0.80    0.12 
 -13   1  -7    0.87    0.13 
  13   1   7    0.72    0.13 
  14  -1   7    2.71    0.21 
 -14  -1  -7    2.99    0.20 
  14   1   7    1.94    0.20 
 -14   1  -7    2.41    0.20 
 -15  -1  -7    3.95    0.24 
  15  -1   7    3.49    0.23 
 -15   1  -7    3.91    0.24 
  15   1   7    3.92    0.25 
  16  -1   7    0.22    0.12 
 -16  -1  -7    0.15    0.12 
  16   1   7    0.09    0.11 
 -16   1  -7    0.06    0.11 
  17  -1   7    3.34    0.29 
  17   1   7    3.57    0.26 
 -17   1  -7    4.00    0.27 
 -18  -2   7    3.16    0.25 
 -18   2   7    2.87    0.23 
  18   2  -7    2.41    0.25 
 -17  -2   7    0.75    0.14 
  17   2  -7    0.44    0.13 
 -17   2   7    0.46    0.13 
 -16  -2   7    0.43    0.12 
  16   2  -7    0.75    0.14 
 -16   2   7    0.35    0.11 
 -15  -2   7    0.55    0.12 
  15  -2  -7    0.22    0.10 
 -15   2   7    0.09    0.09 
  15   2  -7    0.15    0.11 
  14  -2  -7    0.42    0.09 
 -14  -2   7    0.37    0.10 
  14  -2  -7    0.15    0.09 
 -14   2   7    0.20    0.09 
  14   2  -7    0.05    0.09 
  13  -2  -7    6.10    0.21 
 -13  -2   7    5.65    0.23 
  13  -2  -7    5.34    0.25 
  13   2  -7    6.58    0.26 
 -13   2   7    6.44    0.25 
 -12  -2   7    1.10    0.12 
  12  -2  -7    0.98    0.13 
  12  -2  -7    1.24    0.12 
  12   2  -7    1.44    0.15 
 -12   2   7    1.40    0.15 
 -11  -2   7   34.85    0.62 
  11  -2  -7   32.29    0.65 
  11  -2  -7   33.74    0.58 
 -11   2   7   30.73    0.58 
  11   2  -7   30.58    0.59 
 -10  -2   7    6.89    0.21 
  10  -2  -7    7.07    0.20 
 -10  -2   7    7.48    0.23 
  10  -2  -7    7.30    0.25 
  10   2  -7    7.94    0.25 
 -10   2   7    8.68    0.25 
   9  -2  -7   26.64    0.47 
   9  -2  -7   27.02    0.54 
  -9  -2   7   27.28    0.51 
  -9  -2   7   27.46    0.50 
  -9   2   7   24.48    0.47 
   9   2  -7   24.76    0.49 
   8  -2  -7    2.20    0.14 
  -8  -2   7    2.29    0.12 
   8  -2  -7    2.32    0.11 
  -8  -2   7    2.38    0.12 
   8   2  -7    2.47    0.14 
  -8   2   7    2.75    0.14 
  -7  -2   7   13.73    0.30 
   7  -2  -7   13.70    0.32 
   7  -2  -7   13.46    0.27 
  -7  -2   7   13.65    0.30 
  -7   2   7   13.59    0.30 
   7   2  -7   13.66    0.31 
  -6  -2   7    7.40    0.20 
   6  -2  -7    6.87    0.18 
   6  -2  -7    7.31    0.21 
   6   2  -7    8.86    0.23 
   6   2  -7    8.95    0.16 
  -6   2   7    9.02    0.22 
  -6   2   7    8.68    0.15 
   5  -2  -7   26.39    0.44 
   5  -2  -7   26.81    0.49 
  -5  -2   7   26.39    0.46 
  -5  -2   7   25.91    0.46 
   5   2  -7   25.48    0.38 
   5   2  -7   25.14    0.44 
  -5   2   7   24.20    0.44 
   4  -2  -7   12.82    0.25 
   4  -2  -7   12.45    0.28 
  -4  -2   7   12.72    0.27 
  -4  -2   7   12.95    0.27 
   4   2  -7   12.36    0.26 
   4   2  -7   12.82    0.21 
  -4   2   7   12.49    0.26 
  -3  -2   7    8.36    0.20 
  -3  -2   7    8.76    0.15 
   3  -2  -7    8.32    0.21 
   3  -2  -7    8.38    0.19 
   3   2  -7   10.65    0.22 
  -3   2   7   10.88    0.23 
   2  -2  -7    7.58    0.19 
  -2  -2   7    7.84    0.14 
  -2  -2   7    7.42    0.19 
  -2  -2   7    7.52    0.18 
  -2   2   7    9.20    0.20 
  -2   2   7    9.48    0.20 
   2   2  -7    8.91    0.19 
  -1  -2   7   14.58    0.29 
   1  -2  -7   15.29    0.30 
  -1  -2   7   15.54    0.25 
   1  -2  -7   15.62    0.24 
  -1  -2   7   15.10    0.30 
  -1   2   7   13.87    0.27 
   1   2  -7   14.15    0.25 
  -1   2   7   14.30    0.27 
   1   2  -7   14.22    0.28 
   0  -2   7   17.17    0.29 
   0  -2   7   16.93    0.32 
   0  -2  -7   17.13    0.32 
   0  -2  -7   17.17    0.27 
   0   2  -7   19.33    0.31 
   0   2   7   19.31    0.35 
   0   2  -7   19.17    0.36 
   0   2   7   19.40    0.33 
  -1  -2  -7   11.24    0.21 
   1  -2   7   11.14    0.24 
   1  -2   7   11.43    0.22 
  -1  -2  -7   11.13    0.24 
  -1   2  -7    9.60    0.23 
   1   2   7    9.56    0.19 
  -1   2  -7    9.81    0.17 
   1   2   7    9.25    0.22 
   2  -2   7    0.27    0.05 
  -2  -2  -7    0.25    0.04 
   2  -2   7    0.27    0.04 
  -2  -2  -7    0.33    0.05 
   2   2   7    0.33    0.04 
   2   2   7    0.31    0.05 
  -2   2  -7    0.40    0.06 
  -2   2  -7    0.43    0.04 
  -3  -2  -7   14.99    0.30 
  -3  -2  -7   14.70    0.28 
   3  -2   7   14.63    0.29 
   3  -2   7   15.14    0.29 
   3   2   7   15.48    0.33 
   3   2   7   16.37    0.28 
  -3   2  -7   16.30    0.33 
  -4  -2  -7   22.11    0.40 
  -4  -2  -7   21.93    0.39 
   4  -2   7   21.99    0.40 
   4  -2   7   21.62    0.40 
  -4   2  -7   19.29    0.38 
   4   2   7   19.82    0.31 
   4   2   7   18.67    0.39 
  -5  -2  -7   15.58    0.31 
   5  -2   7   15.19    0.32 
   5  -2   7   15.09    0.31 
  -5  -2  -7   14.80    0.30 
   5   2   7   15.53    0.35 
  -5   2  -7   15.39    0.33 
   6  -2   7   17.11    0.35 
  -6  -2  -7   17.38    0.34 
  -6  -2  -7   17.67    0.35 
   6  -2   7   17.52    0.36 
  -6   2  -7   16.27    0.35 
   6   2   7   16.15    0.38 
  -7  -2  -7   20.51    0.40 
   7  -2   7   20.59    0.42 
  -7  -2  -7   20.74    0.39 
   7  -2   7   20.52    0.40 
  -7   2  -7   18.69    0.39 
   7   2   7   18.49    0.42 
  -8  -2  -7    2.50    0.14 
   8  -2   7    2.55    0.14 
  -8  -2  -7    2.72    0.13 
   8  -2   7    2.64    0.13 
  -8   2  -7    2.49    0.15 
  -8   2  -7    2.60    0.13 
   8   2   7    2.68    0.16 
   9  -2   7   12.33    0.32 
  -9  -2  -7   12.64    0.31 
  -9  -2  -7   12.99    0.30 
  -9   2  -7   15.27    0.36 
   9   2   7   16.44    0.41 
  -9   2  -7   15.65    0.34 
 -10  -2  -7    7.74    0.26 
  10  -2   7    8.20    0.26 
 -10  -2  -7    7.62    0.23 
 -10   2  -7    5.55    0.20 
  10   2   7    5.92    0.25 
 -10   2  -7    6.39    0.23 
  11  -2   7    7.72    0.27 
 -11  -2  -7    7.80    0.24 
 -11  -2  -7    6.83    0.25 
 -11   2  -7    7.05    0.23 
 -11   2  -7    7.38    0.26 
  11   2   7    8.03    0.30 
 -12  -2  -7    0.48    0.11 
  12  -2   7    0.52    0.11 
 -12   2  -7    0.67    0.10 
  12   2   7    0.62    0.10 
  12   2   7    0.55    0.12 
 -12   2  -7    0.79    0.12 
 -13  -2  -7    1.38    0.15 
  13  -2   7    1.23    0.15 
  13   2   7    0.74    0.14 
 -13   2  -7    0.70    0.12 
 -13   2  -7    0.83    0.12 
 -14  -2  -7    0.11    0.10 
  14  -2   7   -0.03    0.09 
 -14   2  -7    0.29    0.11 
  14   2   7    0.15    0.11 
  15  -2   7    1.82    0.21 
 -15  -2  -7    1.95    0.21 
  15   2   7    2.00    0.23 
 -15   2  -7    1.47    0.17 
  16  -2   7    2.37    0.22 
 -16  -2  -7    2.11    0.23 
 -16   2  -7    1.50    0.18 
  16   2   7    1.48    0.19 
 -17   2  -7    0.46    0.14 
 -18   3   7    1.25    0.22 
 -17  -3   7    1.66    0.19 
 -17   3   7    1.44    0.18 
  17   3  -7    1.42    0.19 
 -16  -3   7    1.40    0.17 
 -16   3   7    2.23    0.22 
  16   3  -7    2.27    0.23 
  15  -3  -7    1.56    0.15 
 -15  -3   7    1.70    0.18 
 -15   3   7    1.11    0.15 
  15   3  -7    1.20    0.16 
 -14  -3   7    6.38    0.28 
  14  -3  -7    6.15    0.24 
  14   3  -7    4.79    0.26 
 -14   3   7    4.72    0.24 
  13  -3  -7    5.98    0.26 
 -13  -3   7    6.41    0.27 
  13  -3  -7    5.67    0.22 
  13   3  -7    4.37    0.23 
 -13   3   7    4.33    0.22 
  12  -3  -7    3.04    0.17 
 -12  -3   7    3.01    0.19 
  12  -3  -7    3.03    0.19 
 -12   3   7    2.58    0.18 
  12   3  -7    2.83    0.20 
 -11  -3   7    1.80    0.16 
  11  -3  -7    1.91    0.16 
  11  -3  -7    1.73    0.14 
 -11   3   7    2.66    0.17 
  11   3  -7    2.45    0.18 
 -10  -3   7    9.69    0.29 
  10  -3  -7    9.79    0.26 
  10  -3  -7    9.64    0.29 
  10   3  -7   12.32    0.33 
 -10   3   7   11.90    0.32 
   9  -3  -7    0.81    0.09 
  -9  -3   7    0.64    0.09 
   9  -3  -7    0.84    0.11 
   9   3  -7    0.91    0.11 
  -9   3   7    0.61    0.09 
  -8  -3   7   23.81    0.47 
  -8  -3   7   24.17    0.44 
   8  -3  -7   24.00    0.45 
   8  -3  -7   24.25    0.49 
  -8   3   7   24.92    0.49 
   8   3  -7   24.82    0.49 
  -7  -3   7    2.61    0.12 
  -7  -3   7    2.46    0.13 
   7  -3  -7    2.43    0.14 
   7  -3  -7    2.24    0.13 
  -7   3   7    1.91    0.12 
   7   3  -7    2.27    0.13 
   6  -3  -7    8.68    0.24 
   6  -3  -7    8.39    0.22 
  -6  -3   7    8.73    0.23 
  -6  -3   7    8.43    0.21 
  -6   3   7    8.18    0.23 
   6   3  -7    8.44    0.23 
  -5  -3   7    5.22    0.18 
   5  -3  -7    5.15    0.18 
   5  -3  -7    5.14    0.17 
  -5  -3   7    5.37    0.16 
   5   3  -7    4.13    0.15 
  -5   3   7    4.18    0.15 
   5   3  -7    4.36    0.12 
   4  -3  -7   10.80    0.26 
   4  -3  -7   10.87    0.25 
  -4  -3   7   10.71    0.26 
  -4  -3   7   10.82    0.24 
  -4   3   7    9.81    0.24 
   4   3  -7   10.06    0.24 
   4   3  -7   10.07    0.20 
  -3  -3   7    6.04    0.18 
   3  -3  -7    6.10    0.18 
  -3  -3   7    5.79    0.17 
  -3  -3   7    5.68    0.14 
   3  -3  -7    5.81    0.18 
  -3   3   7    5.81    0.17 
   3   3  -7    6.11    0.17 
  -2  -3   7   15.06    0.27 
  -2  -3   7   13.93    0.31 
   2  -3  -7   14.74    0.30 
  -2  -3   7   14.40    0.29 
   2  -3  -7   14.53    0.31 
   2   3  -7   16.91    0.32 
  -2   3   7   17.13    0.33 
  -1  -3   7    1.61    0.10 
   1  -3  -7    1.74    0.05 
  -1  -3   7    1.59    0.08 
   1  -3  -7    1.65    0.11 
  -1  -3   7    1.54    0.10 
  -1   3   7    1.59    0.10 
  -1   3   7    1.60    0.09 
   1   3  -7    1.52    0.08 
   0  -3   7   29.62    0.48 
   0  -3   7   28.57    0.50 
   0  -3  -7   29.49    0.44 
   0  -3  -7   29.23    0.52 
   0   3  -7   29.38    0.52 
   0   3   7   29.47    0.52 
   0   3  -7   29.70    0.47 
   0   3   7   29.27    0.48 
  -1  -3  -7    4.47    0.16 
  -1  -3  -7    4.78    0.12 
   1  -3   7    4.62    0.14 
   1  -3   7    4.66    0.15 
   1   3   7    4.81    0.13 
  -1   3  -7    4.87    0.12 
  -1   3  -7    4.82    0.17 
   2  -3   7   11.11    0.25 
   2  -3   7   10.94    0.26 
  -2  -3  -7   11.55    0.27 
  -2  -3  -7   11.41    0.22 
  -2   3  -7   13.90    0.24 
   2   3   7   14.30    0.26 
  -2   3  -7   13.83    0.31 
   2   3   7   13.50    0.31 
  -3  -3  -7   21.03    0.41 
   3  -3   7   21.15    0.40 
   3  -3   7   20.59    0.39 
  -3  -3  -7   21.00    0.37 
  -3   3  -7   21.59    0.42 
   3   3   7   21.20    0.43 
   3   3   7   22.06    0.38 
   4  -3   7    5.94    0.19 
  -4  -3  -7    6.42    0.20 
   4  -3   7    6.05    0.19 
  -4  -3  -7    6.33    0.17 
  -4   3  -7    7.01    0.21 
   4   3   7    6.93    0.22 
  -5  -3  -7    4.25    0.17 
   5  -3   7    3.69    0.16 
  -5  -3  -7    3.88    0.14 
   5  -3   7    3.63    0.15 
   5   3   7    3.95    0.18 
  -5   3  -7    3.44    0.16 
   6  -3   7   16.96    0.36 
  -6  -3  -7   16.75    0.36 
   6  -3   7   17.07    0.37 
  -6  -3  -7   16.46    0.34 
   6   3   7   17.51    0.42 
  -6   3  -7   18.26    0.39 
   7  -3   7    0.90    0.10 
  -7  -3  -7    0.70    0.09 
   7  -3   7    0.96    0.11 
  -7  -3  -7    0.94    0.10 
  -7   3  -7    0.58    0.09 
   7   3   7    0.50    0.09 
  -8  -3  -7   18.52    0.40 
  -8  -3  -7   18.92    0.40 
   8  -3   7   19.41    0.42 
  -8   3  -7   14.64    0.34 
   8   3   7   15.08    0.40 
  -8   3  -7   15.06    0.35 
  -9  -3  -7    3.37    0.17 
   9  -3   7    3.37    0.18 
  -9  -3  -7    3.56    0.18 
   9   3   7    4.38    0.22 
  -9   3  -7    4.34    0.19 
  -9   3  -7    4.48    0.20 
  10  -3   7    3.33    0.20 
 -10  -3  -7    3.17    0.18 
 -10  -3  -7    3.37    0.18 
 -10   3  -7    3.26    0.18 
  10   3   7    3.11    0.21 
 -10   3  -7    3.27    0.18 
 -11  -3  -7   10.51    0.31 
  11  -3   7   10.79    0.33 
 -11  -3  -7   10.58    0.32 
 -11   3  -7    9.94    0.30 
  11   3   7   10.31    0.36 
 -11   3  -7   10.37    0.31 
  12  -3   7    3.74    0.23 
 -12  -3  -7    3.76    0.21 
 -12  -3  -7    3.80    0.21 
  12   3   7    3.35    0.20 
 -12   3  -7    3.74    0.21 
  12   3   7    3.41    0.23 
 -12   3  -7    3.19    0.19 
  13  -3   7    0.94    0.14 
 -13  -3  -7    1.28    0.15 
  13   3   7    0.65    0.14 
 -13   3  -7    0.56    0.12 
  13   3   7    0.49    0.11 
 -13   3  -7    0.55    0.12 
  14  -3   7    3.72    0.25 
 -14  -3  -7    3.48    0.24 
 -14   3  -7    3.08    0.22 
  14   3   7    3.42    0.22 
 -14   3  -7    3.78    0.23 
  14   3   7    3.31    0.25 
  15  -3   7    1.45    0.18 
 -15  -3  -7    1.21    0.17 
 -15   3  -7    1.57    0.17 
  15   3   7    1.43    0.19 
  16   3   7    2.18    0.25 
  16  -4  -7    0.75    0.14 
 -16   4   7    0.62    0.16 
 -15  -4   7    2.89    0.24 
  15  -4  -7    2.72    0.21 
 -15   4   7    3.21    0.24 
  15   4  -7    3.50    0.26 
 -14  -4   7    3.42    0.24 
  14  -4  -7    3.59    0.22 
  14   4  -7    4.06    0.25 
 -14   4   7    4.44    0.26 
 -13  -4   7    2.28    0.21 
  13  -4  -7    2.60    0.19 
  13   4  -7    1.96    0.20 
 -13   4   7    1.97    0.20 
  12  -4  -7    0.72    0.12 
 -12  -4   7    0.56    0.12 
  12   4  -7    1.24    0.16 
 -12   4   7    0.97    0.14 
 -11  -4   7    7.02    0.28 
  11  -4  -7    7.04    0.26 
  11  -4  -7    6.72    0.25 
 -11   4   7    6.38    0.26 
  11   4  -7    6.57    0.28 
  10  -4  -7    5.52    0.22 
 -10  -4   7    5.68    0.24 
  10  -4  -7    5.81    0.23 
 -10   4   7    6.12    0.25 
  10   4  -7    5.95    0.26 
   9  -4  -7   11.92    0.31 
  -9  -4   7   11.71    0.33 
   9  -4  -7   11.96    0.32 
   9   4  -7   13.05    0.35 
  -9   4   7   13.25    0.35 
  -8  -4   7    4.15    0.20 
   8  -4  -7    4.10    0.18 
   8  -4  -7    3.99    0.19 
   8   4  -7    3.77    0.19 
  -8   4   7    3.77    0.18 
  -7  -4   7    1.91    0.17 
   7  -4  -7    2.04    0.14 
   7  -4  -7    1.97    0.14 
  -7  -4   7    2.35    0.15 
  -7   4   7    0.67    0.10 
   7   4  -7    0.72    0.10 
  -6  -4   7   15.75    0.36 
  -6  -4   7   15.56    0.32 
   6  -4  -7   15.64    0.35 
   6  -4  -7   15.08    0.35 
  -6   4   7   16.27    0.37 
   6   4  -7   16.24    0.37 
   5  -4  -7   11.93    0.30 
  -5  -4   7   11.85    0.30 
  -5  -4   7   11.66    0.27 
   5  -4  -7   12.19    0.30 
   5   4  -7   12.87    0.31 
  -5   4   7   13.03    0.31 
   4  -4  -7    8.52    0.24 
  -4  -4   7    8.18    0.22 
  -4  -4   7    8.68    0.25 
   4  -4  -7    8.32    0.24 
  -4   4   7   12.12    0.29 
   4   4  -7   12.19    0.33 
   4   4  -7   11.63    0.28 
  -3  -4   7   12.81    0.30 
  -3  -4   7   12.62    0.27 
   3  -4  -7   12.12    0.30 
  -3  -4   7   12.76    0.28 
   3  -4  -7   12.41    0.30 
   3   4  -7   16.13    0.33 
  -3   4   7   15.77    0.34 
  -2  -4   7    0.79    0.08 
  -2  -4   7    0.70    0.09 
   2  -4  -7    0.94    0.11 
  -2  -4   7    0.92    0.09 
   2  -4  -7    0.69    0.09 
  -2   4   7    0.39    0.07 
  -2   4   7    0.23    0.07 
   2   4  -7    0.47    0.07 
  -1  -4   7   14.12    0.31 
  -1  -4   7   14.27    0.30 
   1  -4  -7   13.98    0.33 
  -1   4   7   11.49    0.26 
  -1   4   7   10.91    0.29 
   1   4  -7   11.32    0.25 
   1   4  -7   11.67    0.29 
   0  -4   7    1.00    0.09 
   0  -4  -7    0.69    0.09 
   0  -4   7    0.78    0.09 
   0   4   7    1.01    0.08 
   0   4  -7    0.89    0.10 
   0   4  -7    0.95    0.08 
   0   4   7    0.83    0.10 
  -1  -4  -7   18.95    0.40 
   1  -4   7   18.65    0.37 
   1  -4   7   18.44    0.38 
   1   4   7   18.17    0.40 
  -1   4  -7   17.79    0.39 
   1   4   7   18.07    0.33 
   2  -4   7    0.44    0.08 
  -2  -4  -7    0.48    0.06 
  -2  -4  -7    0.44    0.08 
   2  -4   7    0.43    0.07 
  -2   4  -7    1.02    0.12 
   2   4   7    1.08    0.12 
   3  -4   7    4.33    0.17 
   3  -4   7    3.70    0.17 
  -3  -4  -7    4.13    0.14 
  -3  -4  -7    3.86    0.17 
   3   4   7    5.59    0.22 
  -3   4  -7    5.72    0.21 
  -4  -4  -7    2.63    0.12 
   4  -4   7    2.30    0.14 
   4  -4   7    2.53    0.14 
  -4  -4  -7    2.66    0.16 
   4   4   7    3.25    0.18 
  -4   4  -7    3.21    0.16 
   5  -4   7    6.46    0.22 
  -5  -4  -7    6.85    0.20 
  -5  -4  -7    6.44    0.23 
   5  -4   7    6.43    0.22 
   5   4   7    6.64    0.25 
  -5   4  -7    6.69    0.23 
   6  -4   7    1.87    0.14 
  -6  -4  -7    1.67    0.15 
   6  -4   7    1.64    0.14 
  -6  -4  -7    1.73    0.12 
  -6   4  -7    1.44    0.14 
   6   4   7    1.68    0.15 
  -6   4  -7    1.49    0.14 
  -7  -4  -7    0.72    0.11 
  -7  -4  -7    0.74    0.09 
   7  -4   7    0.87    0.11 
  -7   4  -7    1.09    0.12 
  -7   4  -7    1.12    0.13 
   7   4   7    1.29    0.15 
  -8  -4  -7    3.22    0.17 
  -8  -4  -7    3.66    0.20 
   8  -4   7    3.38    0.19 
   8   4   7    4.25    0.23 
  -8   4  -7    3.80    0.19 
  -8   4  -7    3.51    0.20 
  -9  -4  -7    8.29    0.28 
   9  -4   7    7.33    0.28 
  -9  -4  -7    7.72    0.26 
  -9   4  -7    7.35    0.26 
   9   4   7    7.79    0.31 
  -9   4  -7    8.68    0.29 
  10  -4   7    4.09    0.22 
 -10  -4  -7    3.71    0.20 
 -10  -4  -7    4.20    0.23 
 -10   4  -7    4.32    0.23 
  10   4   7    4.19    0.25 
  11  -4   7    2.15    0.19 
 -11  -4  -7    1.78    0.19 
 -11  -4  -7    1.70    0.18 
  11   4   7    2.30    0.21 
 -11   4  -7    2.67    0.21 
 -12  -4  -7    1.63    0.18 
  12  -4   7    1.46    0.17 
 -12  -4  -7    1.55    0.17 
 -12   4  -7    1.25    0.15 
  12   4   7    1.39    0.18 
  13  -4   7    1.49    0.18 
 -13  -4  -7    1.94    0.21 
  13   4   7    1.87    0.20 
 -13   4  -7    1.64    0.17 
  13   4   7    1.77    0.20 
  14  -4   7    2.88    0.24 
 -14  -4  -7    2.53    0.23 
 -14   4  -7    3.67    0.25 
  14   4   7    2.95    0.24 
  14   4   7    3.72    0.28 
  15   4   7    4.89    0.28 
 -15   4  -7    5.32    0.29 
  14  -5  -7    3.09    0.24 
  13  -5  -7    2.46    0.20 
 -13  -5   7    2.18    0.22 
 -13   5   7    1.91    0.21 
  13   5  -7    1.68    0.19 
 -12  -5   7    2.48    0.22 
  12  -5  -7    2.37    0.21 
  12   5  -7    2.24    0.23 
 -12   5   7    2.58    0.22 
  11  -5  -7    0.68    0.13 
 -11  -5   7    0.75    0.14 
 -11   5   7    0.64    0.13 
  11   5  -7    0.75    0.14 
 -10  -5   7    0.31    0.11 
  10  -5  -7    0.36    0.11 
 -10   5   7    0.39    0.11 
  10   5  -7    0.57    0.13 
   9  -5  -7    0.37    0.09 
   9  -5  -7    0.05    0.09 
  -9  -5   7    0.16    0.09 
   9   5  -7    0.08    0.09 
  -9   5   7    0.18    0.10 
  -8  -5   7    4.90    0.23 
   8  -5  -7    5.66    0.23 
   8  -5  -7    5.42    0.23 
   8   5  -7    4.90    0.24 
  -8   5   7    5.10    0.23 
   7  -5  -7    0.28    0.09 
   7  -5  -7    0.29    0.09 
  -7  -5   7    0.16    0.09 
   7   5  -7    0.33    0.10 
  -7   5   7    0.26    0.09 
   6  -5  -7    1.02    0.12 
   6  -5  -7    0.69    0.11 
  -6  -5   7    0.90    0.12 
   6   5  -7    1.63    0.16 
  -6   5   7    1.56    0.15 
   5  -5  -7    5.07    0.22 
  -5  -5   7    5.64    0.22 
   5  -5  -7    5.64    0.22 
  -5  -5   7    5.51    0.21 
  -5   5   7    5.80    0.22 
   5   5  -7    5.87    0.22 
  -4  -5   7   13.63    0.32 
   4  -5  -7   13.38    0.35 
  -4  -5   7   13.57    0.35 
   4  -5  -7   13.33    0.35 
  -4   5   7    9.99    0.28 
   4   5  -7    9.69    0.28 
   3  -5  -7    0.54    0.10 
  -3  -5   7    0.58    0.09 
   3  -5  -7    0.37    0.09 
  -3  -5   7    0.40    0.09 
   3   5  -7    1.33    0.13 
  -3   5   7    1.14    0.12 
  -2  -5   7   30.56    0.56 
  -2  -5   7   30.83    0.56 
  -2  -5   7   30.72    0.59 
   2  -5  -7   30.30    0.59 
  -2   5   7   33.07    0.63 
  -2   5   7   33.54    0.59 
   2   5  -7   32.78    0.58 
   1  -5  -7    3.32    0.18 
  -1  -5   7    3.37    0.16 
  -1  -5   7    3.36    0.16 
  -1   5   7    2.88    0.14 
   1   5  -7    2.85    0.17 
   1   5  -7    2.81    0.14 
  -1   5   7    2.57    0.17 
   0  -5  -7   17.82    0.41 
   0  -5   7   17.16    0.39 
   0  -5   7   17.60    0.38 
   0   5  -7   20.87    0.45 
   0   5   7   21.19    0.47 
  -1  -5  -7    0.38    0.10 
   1  -5   7    0.30    0.08 
   1  -5   7    0.27    0.08 
  -1   5  -7    0.19    0.08 
   1   5   7    0.13    0.08 
   2  -5   7    3.86    0.18 
   2  -5   7    4.20    0.19 
  -2  -5  -7    3.96    0.20 
  -2   5  -7    3.51    0.19 
   2   5   7    4.13    0.21 
  -3  -5  -7    3.42    0.20 
   3  -5   7    3.81    0.19 
   3  -5   7    4.08    0.19 
   3   5   7    2.61    0.18 
  -3   5  -7    2.59    0.17 
   4  -5   7    1.43    0.14 
   4  -5   7    1.22    0.13 
  -4  -5  -7    1.47    0.16 
  -4   5  -7    0.75    0.11 
   4   5   7    0.73    0.12 
  -4   5  -7    0.63    0.11 
  -5  -5  -7    3.19    0.20 
   5  -5   7    3.00    0.18 
  -5   5  -7    3.23    0.19 
   5   5   7    3.70    0.22 
  -6  -5  -7    2.68    0.19 
   6  -5   7    2.74    0.18 
  -6   5  -7    2.56    0.19 
   6   5   7    2.30    0.19 
  -7  -5  -7    0.42    0.11 
  -7  -5  -7    0.70    0.16 
   7  -5   7    0.44    0.11 
  -7   5  -7    0.35    0.11 
   7   5   7    0.58    0.13 
   8  -5   7    0.46    0.11 
  -8  -5  -7    0.42    0.10 
  -8  -5  -7    0.43    0.12 
  -8   5  -7    0.51    0.12 
   8   5   7    0.54    0.13 
  -9  -5  -7    2.48    0.20 
  -9  -5  -7    2.17    0.17 
   9  -5   7    2.59    0.20 
  -9   5  -7    3.32    0.23 
   9   5   7    3.00    0.23 
  10  -5   7    6.22    0.29 
 -10  -5  -7    5.56    0.25 
 -10  -5  -7    6.06    0.29 
 -10   5  -7    5.11    0.27 
  10   5   7    5.04    0.29 
 -11  -5  -7    1.36    0.17 
  11  -5   7    1.37    0.17 
 -11  -5  -7    1.28    0.15 
 -11   5  -7    1.82    0.20 
  11   5   7    1.58    0.19 
 -12  -5  -7    1.63    0.19 
 -12  -5  -7    1.74    0.20 
  12  -5   7    1.94    0.21 
  12   5   7    2.18    0.24 
 -12   5  -7    1.83    0.20 
 -13  -5  -7    1.89    0.22 
  13   5   7    1.82    0.25 
  13   5   7    1.90    0.29 
  11  -6  -7    0.13    0.13 
 -11  -6   7    0.30    0.13 
  11   6  -7    0.17    0.13 
 -11   6   7    0.24    0.14 
 -10  -6   7    1.76    0.20 
  10  -6  -7    1.90    0.21 
  10   6  -7    1.29    0.17 
 -10   6   7    1.52    0.18 
   9  -6  -7    0.19    0.12 
  -9  -6   7    0.36    0.12 
  -9   6   7    0.20    0.11 
   9   6  -7    0.24    0.12 
   8  -6  -7    2.27    0.20 
  -8  -6   7    2.54    0.21 
   8   6  -7    2.58    0.22 
  -8   6   7    2.08    0.20 
   7  -6  -7    1.89    0.20 
   7  -6  -7    2.08    0.18 
  -7  -6   7    2.24    0.19 
   7   6  -7    1.83    0.19 
  -7   6   7    1.86    0.18 
   6  -6  -7    1.29    0.16 
  -6  -6   7    1.36    0.15 
   6  -6  -7    0.88    0.13 
  -6   6   7    1.17    0.14 
   6   6  -7    1.16    0.14 
   5  -6  -7    3.71    0.23 
  -5  -6   7    3.35    0.21 
   5  -6  -7    3.21    0.20 
  -5   6   7    4.17    0.21 
   5   6  -7    4.12    0.22 
  -4  -6   7    5.22    0.24 
   4  -6  -7    5.37    0.24 
   4  -6  -7    5.72    0.26 
   4   6  -7    4.88    0.23 
  -4   6   7    5.12    0.22 
  -3  -6   7   10.60    0.32 
   3  -6  -7   10.12    0.32 
   3   6  -7   10.38    0.30 
  -3   6   7   10.33    0.33 
  -3   6   7   10.32    0.30 
  -2  -6   7    1.02    0.12 
   2  -6  -7    0.92    0.13 
   2   6  -7    1.21    0.14 
  -2   6   7    1.14    0.14 
   1  -6  -7   10.40    0.33 
  -1  -6   7   10.14    0.30 
  -1  -6   7   10.34    0.31 
  -1   6   7    9.22    0.32 
   1   6  -7    9.11    0.30 
   0  -6  -7    0.37    0.11 
   0  -6   7    0.28    0.09 
   0  -6   7    0.29    0.09 
   0   6   7    0.35    0.11 
   1  -6   7    4.73    0.22 
  -1  -6  -7    5.12    0.24 
  -1   6  -7    6.56    0.24 
   1   6   7    6.11    0.27 
  -2  -6  -7    2.66    0.21 
   2  -6   7    2.83    0.19 
  -2   6  -7    2.33    0.17 
   2   6   7    2.82    0.21 
   3  -6   7    1.72    0.17 
  -3  -6  -7    1.82    0.19 
   3   6   7    1.61    0.19 
  -3   6  -7    1.81    0.18 
   4  -6   7    2.08    0.19 
  -4  -6  -7    2.33    0.20 
  -4   6  -7    2.94    0.20 
   4   6   7    3.13    0.22 
   5  -6   7    1.10    0.15 
  -5  -6  -7    1.32    0.16 
  -5   6  -7    0.90    0.14 
   5   6   7    1.27    0.16 
   6  -6   7    0.17    0.11 
  -6  -6  -7    0.28    0.12 
  -6   6  -7    0.02    0.10 
   6   6   7    0.02    0.11 
  -7  -6  -7    0.82    0.15 
   7  -6   7    0.91    0.15 
  -7   6  -7    0.99    0.15 
   7   6   7    0.95    0.16 
  -8  -6  -7    1.24    0.17 
   8  -6   7    1.58    0.18 
  -8   6  -7    1.15    0.16 
   8   6   7    0.80    0.16 
   9  -6   7    0.89    0.16 
  -9  -6  -7    0.88    0.16 
   9   6   7    1.14    0.19 
  -9   6  -7    1.13    0.17 
  10   6   7    2.30    0.25 
  -8  -7   7    1.30    0.18 
   8   7  -7    0.97    0.21 
  -7  -7   7    2.53    0.22 
  -7   7   7    2.86    0.23 
   7   7  -7    2.43    0.23 
   6  -7  -7    0.66    0.24 
  -6  -7   7    0.70    0.18 
  -6   7   7    0.59    0.13 
   6   7  -7    0.43    0.14 
   5  -7  -7    1.12    0.15 
   5  -7  -7    1.00    0.15 
   4  -7  -7    2.04    0.21 
  -4   7   7    1.50    0.17 
   3  -7  -7    0.08    0.11 
  -3   7   7    0.00    0.10 
   2  -7  -7    5.09    0.27 
  -2   7   7    5.60    0.28 
   1  -7  -7    0.09    0.11 
  -1   7   7    0.10    0.11 
   0  -7  -7    5.57    0.28 
   0   7   7    6.16    0.30 
   0   7  -7    5.85    0.28 
  -1  -7  -7    0.06    0.12 
  -1   7  -7    0.36    0.12 
   1   7   7    0.32    0.13 
   2  -7   7    3.21    0.24 
  -2  -7  -7    3.00    0.24 
  -2   7  -7    2.86    0.22 
   2   7   7    3.17    0.25 
  -3  -7  -7    0.14    0.12 
   3  -7   7   -0.01    0.10 
   3   7   7    0.00    0.12 
  -3   7  -7   -0.04    0.11 
   4  -7   7    0.95    0.15 
  -4  -7  -7    0.72    0.15 
   4   7   7    0.68    0.15 
  -4   7  -7    0.54    0.14 
   5  -7   7    0.01    0.11 
   5   7   7   -0.13    0.12 
  -5   7  -7   -0.02    0.12 
   6  -7   7    0.18    0.13 
  19   0  -8    1.07    0.21 
  18   0  -8    0.68    0.15 
  17   0  -8    0.08    0.11 
 -16   0   8   18.38    0.43 
  16   0  -8   17.26    0.47 
  15   0  -8    7.75    0.30 
 -15   0   8    7.82    0.27 
 -15   0   8    8.41    0.27 
 -14   0   8    2.33    0.16 
 -14   0   8    2.42    0.15 
  14   0  -8    2.10    0.18 
  13   0  -8    9.19    0.30 
 -13   0   8    9.27    0.28 
 -13   0   8    9.29    0.26 
  12   0  -8    0.71    0.11 
 -12   0   8    0.52    0.08 
 -12   0   8    0.54    0.09 
  11   0  -8   17.35    0.40 
 -11   0   8   17.12    0.35 
 -11   0   8   17.13    0.37 
 -10   0   8    0.34    0.07 
  10   0  -8    0.47    0.08 
 -10   0   8    0.34    0.06 
   9   0  -8    0.42    0.08 
  -9   0   8    0.29    0.06 
  -9   0   8    0.50    0.07 
   9   0  -8    0.40    0.04 
  -8   0   8    1.01    0.08 
   8   0  -8    1.10    0.06 
   8   0  -8    1.17    0.10 
  -8   0   8    1.14    0.09 
  -7   0   8    8.23    0.21 
   7   0  -8    8.29    0.15 
   7   0  -8    8.22    0.22 
  -7   0   8    8.03    0.19 
   6   0  -8    3.73    0.08 
   6   0  -8    3.58    0.14 
  -6   0   8    3.55    0.11 
  -6   0   8    3.85    0.14 
  -5   0   8    6.34    0.18 
  -5   0   8    6.65    0.15 
   5   0  -8    6.48    0.18 
   5   0  -8    6.58    0.12 
   4   0  -8   25.40    0.45 
  -4   0   8   26.31    0.42 
  -4   0   8   26.33    0.37 
  -4   0   8   25.72    0.45 
  -3   0   8    2.68    0.06 
  -3   0   8    2.48    0.09 
   3   0  -8    2.67    0.11 
   2   0  -8   80.55    1.13 
   2   0  -8   76.58    1.14 
  -2   0   8   80.72    1.10 
  -2   0   8   78.87    1.16 
  -1   0   8   15.98    0.27 
   1   0  -8   15.43    0.28 
   1   0  -8   16.02    0.29 
  -1   0   8   15.91    0.31 
   0   0  -8   79.12    1.14 
   0   0   8   79.98    1.16 
   0   0   8   79.38    1.13 
   0   0  -8   80.13    1.13 
  -1   0  -8    6.79    0.17 
  -1   0  -8    7.17    0.15 
   1   0   8    7.13    0.17 
   1   0   8    6.72    0.17 
  -2   0  -8   58.59    0.89 
   2   0   8   60.04    0.90 
  -2   0  -8   59.78    0.85 
   2   0   8   59.15    0.87 
  -3   0  -8   19.75    0.36 
   3   0   8   19.83    0.34 
  -3   0  -8   19.91    0.32 
   3   0   8   19.91    0.38 
   4   0   8    0.05    0.04 
  -4   0  -8    0.00    0.02 
   4   0   8    0.06    0.03 
  -4   0  -8    0.06    0.04 
   5   0   8   33.61    0.60 
  -5   0  -8   33.67    0.50 
  -5   0  -8   33.62    0.57 
   5   0   8   33.46    0.52 
  -6   0  -8    1.94    0.12 
   6   0   8    2.03    0.12 
  -6   0  -8    1.90    0.08 
   6   0   8    1.89    0.09 
  -7   0  -8    7.38    0.22 
  -7   0  -8    6.97    0.16 
   7   0   8    7.15    0.17 
   7   0   8    7.17    0.23 
   8   0   8    1.40    0.13 
   8   0   8    1.36    0.09 
  -8   0  -8    1.21    0.12 
  -9   0  -8    9.15    0.21 
  -9   0  -8    8.53    0.26 
   9   0   8    9.02    0.28 
 -10   0  -8    9.96    0.29 
  10   0   8    9.65    0.31 
  11   0   8    1.99    0.17 
 -11   0  -8    2.19    0.17 
  12   0   8   16.91    0.45 
 -12   0  -8   17.53    0.43 
 -13   0  -8    2.85    0.20 
  13   0   8    2.21    0.19 
 -14   0  -8   17.91    0.46 
  14   0   8   17.63    0.48 
  15   0   8    0.02    0.10 
 -15   0  -8    0.07    0.11 
  16   0   8    2.19    0.24 
 -16   0  -8    2.13    0.22 
 -19  -1   8    5.97    0.29 
  19   1  -8    7.20    0.35 
 -18  -1   8    0.53    0.13 
  18   1  -8    0.32    0.13 
 -17  -1   8    6.55    0.28 
  17  -1  -8    6.78    0.31 
  17   1  -8    5.58    0.29 
  16  -1  -8    6.11    0.29 
 -16  -1   8    6.13    0.26 
  16   1  -8    6.15    0.29 
 -16   1   8    6.31    0.26 
  15  -1  -8    4.61    0.24 
 -15  -1   8    4.59    0.22 
 -15   1   8    4.61    0.22 
  15   1  -8    4.89    0.25 
  14  -1  -8    7.80    0.29 
 -14  -1   8    7.66    0.26 
  14   1  -8    6.63    0.27 
 -14   1   8    6.76    0.25 
 -13  -1   8    0.44    0.09 
 -13  -1   8    0.69    0.10 
  13  -1  -8    0.67    0.11 
  13   1  -8    0.99    0.13 
 -13   1   8    0.63    0.10 
 -12  -1   8   16.69    0.37 
  12  -1  -8   16.63    0.41 
 -12  -1   8   16.46    0.37 
 -12   1   8   16.78    0.38 
 -12   1   8   16.17    0.36 
  12   1  -8   17.35    0.41 
  11  -1  -8    2.85    0.17 
  11  -1  -8    2.65    0.12 
 -11  -1   8    2.65    0.15 
 -11  -1   8    3.02    0.15 
 -11   1   8    3.50    0.13 
 -11   1   8    3.29    0.16 
  11   1  -8    3.38    0.18 
 -10  -1   8    4.72    0.18 
 -10  -1   8    4.77    0.17 
  10  -1  -8    4.95    0.15 
  10  -1  -8    4.73    0.20 
 -10   1   8    5.12    0.19 
  10   1  -8    4.46    0.19 
 -10   1   8    5.16    0.15 
  -9  -1   8    3.13    0.14 
   9  -1  -8    3.12    0.16 
   9  -1  -8    3.01    0.11 
  -9  -1   8    3.23    0.14 
  -9   1   8    2.60    0.13 
  -9   1   8    2.71    0.11 
   9   1  -8    2.71    0.14 
  -8  -1   8    3.62    0.14 
   8  -1  -8    3.63    0.11 
   8  -1  -8    3.68    0.16 
  -8  -1   8    3.85    0.15 
  -8   1   8    3.37    0.14 
   8   1  -8    3.33    0.15 
  -8   1   8    3.23    0.11 
   7  -1  -8    7.91    0.17 
  -7  -1   8    7.75    0.20 
  -7  -1   8    7.74    0.21 
   7  -1  -8    7.99    0.23 
   7   1  -8    7.97    0.22 
   7   1  -8    7.27    0.14 
  -7   1   8    7.57    0.21 
  -7   1   8    7.82    0.16 
   6  -1  -8   29.23    0.53 
  -6  -1   8   29.61    0.52 
   6  -1  -8   29.23    0.45 
  -6  -1   8   29.03    0.49 
  -6   1   8   32.13    0.47 
   6   1  -8   30.31    0.53 
  -6   1   8   30.77    0.53 
   5  -1  -8   42.20    0.62 
  -5  -1   8   41.77    0.65 
   5  -1  -8   42.06    0.69 
  -5  -1   8   41.22    0.68 
   5   1  -8   40.15    0.66 
  -5   1   8   41.39    0.66 
  -5   1   8   41.79    0.60 
  -4  -1   8    5.09    0.14 
   4  -1  -8    5.25    0.12 
   4  -1  -8    5.02    0.16 
  -4  -1   8    5.07    0.16 
  -4   1   8    6.51    0.13 
   4   1  -8    6.32    0.17 
  -4   1   8    6.35    0.17 
   3  -1  -8   35.50    0.59 
  -3  -1   8   36.27    0.60 
  -3  -1   8   35.87    0.57 
   3  -1  -8   36.91    0.53 
   3   1  -8   37.20    0.59 
  -3   1   8   37.96    0.56 
  -2  -1   8    2.56    0.06 
  -2  -1   8    2.50    0.11 
   2  -1  -8    2.61    0.08 
   2  -1  -8    2.50    0.11 
   2   1  -8    2.96    0.10 
  -2   1   8    3.22    0.09 
  -2   1   8    3.07    0.11 
   1  -1  -8   42.08    0.66 
  -1  -1   8   43.20    0.61 
   1  -1  -8   42.55    0.63 
  -1  -1   8   42.50    0.67 
  -1   1   8   49.82    0.77 
   1   1  -8   50.80    0.77 
   1   1  -8   51.64    0.75 
  -1   1   8   51.33    0.75 
   0  -1   8   35.25    0.52 
   0  -1  -8   34.25    0.53 
   0  -1  -8   34.22    0.55 
   0   1   8   43.20    0.67 
   0   1   8   43.48    0.66 
   0   1  -8   43.96    0.64 
   0   1  -8   43.26    0.68 
   1  -1   8   88.64    1.30 
  -1  -1  -8   91.46    1.29 
   1  -1   8   90.65    1.28 
  -1  -1  -8   91.39    1.28 
  -1   1  -8   99.16    1.44 
   1   1   8  101.03    1.42 
   1   1   8   98.34    1.43 
  -1   1  -8  102.68    1.39 
   2  -1   8   81.89    1.19 
  -2  -1  -8   84.20    1.18 
   2  -1   8   81.75    1.19 
  -2  -1  -8   82.97    1.19 
   2   1   8   82.83    1.18 
  -2   1  -8   85.16    1.14 
   2   1   8   80.94    1.22 
  -2   1  -8   81.34    1.21 
  -3  -1  -8   18.56    0.34 
   3  -1   8   19.68    0.36 
  -3  -1  -8   19.13    0.33 
   3  -1   8   19.38    0.35 
   3   1   8   18.41    0.32 
  -3   1  -8   19.05    0.36 
   3   1   8   18.68    0.37 
  -3   1  -8   18.73    0.27 
  -4  -1  -8   15.84    0.29 
   4  -1   8   16.68    0.33 
  -4  -1  -8   16.21    0.31 
   4  -1   8   16.04    0.30 
   4   1   8   12.21    0.29 
   4   1   8   12.45    0.22 
  -4   1  -8   12.34    0.28 
   5  -1   8    2.16    0.11 
  -5  -1  -8    2.03    0.09 
   5  -1   8    2.24    0.10 
  -5  -1  -8    1.97    0.11 
   5   1   8    1.39    0.11 
   5   1   8    1.46    0.06 
  -5   1  -8    1.31    0.10 
   6  -1   8    2.17    0.12 
   6  -1   8    2.05    0.10 
  -6  -1  -8    2.13    0.12 
  -6  -1  -8    1.93    0.10 
   6   1   8    2.18    0.08 
   6   1   8    2.34    0.14 
  -6   1  -8    2.20    0.13 
   7  -1   8    3.58    0.16 
  -7  -1  -8    3.59    0.13 
   7  -1   8    3.74    0.13 
  -7  -1  -8    3.31    0.15 
  -7   1  -8    4.17    0.17 
   7   1   8    3.73    0.18 
   8  -1   8    2.99    0.13 
   8  -1   8    2.89    0.16 
  -8  -1  -8    2.95    0.15 
  -8  -1  -8    3.06    0.12 
   8   1   8    2.99    0.17 
  -8   1  -8    2.94    0.16 
  -9  -1  -8    1.56    0.14 
   9  -1   8    1.80    0.14 
  -9  -1  -8    1.77    0.10 
  -9   1  -8    1.19    0.10 
   9   1   8    1.27    0.14 
  -9   1  -8    1.20    0.13 
 -10  -1  -8   14.76    0.37 
  10  -1   8   15.68    0.39 
 -10   1  -8   16.07    0.34 
  10   1   8   16.35    0.42 
 -10   1  -8   16.30    0.39 
  10   1   8   15.92    0.33 
  11  -1   8    9.31    0.31 
 -11  -1  -8    9.48    0.30 
 -11   1  -8   11.11    0.27 
 -11   1  -8   10.07    0.31 
  11   1   8   10.48    0.34 
 -12  -1  -8    0.25    0.10 
  12  -1   8    0.33    0.10 
 -12   1  -8    0.09    0.09 
  12   1   8    0.13    0.09 
  13  -1   8   15.14    0.42 
 -13  -1  -8   15.11    0.41 
  13   1   8   15.26    0.45 
 -13   1  -8   15.79    0.42 
  14  -1   8    0.64    0.13 
 -14  -1  -8    0.70    0.13 
  14   1   8    0.70    0.14 
 -14   1  -8    0.59    0.13 
  15  -1   8    7.64    0.32 
 -15  -1  -8    7.67    0.32 
  15   1   8    7.73    0.34 
 -15   1  -8    7.40    0.31 
  16  -1   8    0.78    0.16 
 -16  -1  -8    0.85    0.16 
 -16   1  -8    0.48    0.14 
  16   1   8    0.73    0.16 
 -17   1  -8    0.95    0.18 
 -18  -2   8    1.38    0.18 
 -18   2   8    2.01    0.22 
  18   2  -8    2.12    0.25 
 -17  -2   8    1.07    0.16 
 -17   2   8    1.14    0.16 
  17   2  -8    1.45    0.19 
 -16  -2   8    4.66    0.25 
  16   2  -8    6.75    0.31 
 -16   2   8    5.83    0.27 
 -15  -2   8    7.20    0.29 
  15  -2  -8    7.41    0.31 
 -15   2   8    6.34    0.26 
  15   2  -8    6.88    0.30 
  14  -2  -8    7.17    0.30 
 -14  -2   8    7.48    0.28 
 -14   2   8    6.76    0.26 
  14   2  -8    6.79    0.29 
  13  -2  -8    6.96    0.22 
 -13  -2   8    7.38    0.26 
  13  -2  -8    7.26    0.29 
 -13   2   8    9.53    0.30 
  13   2  -8    8.91    0.31 
 -12  -2   8   17.78    0.41 
  12  -2  -8   17.54    0.37 
  12  -2  -8   17.80    0.45 
  12   2  -8   15.12    0.39 
 -12   2   8   15.49    0.38 
  11  -2  -8   11.55    0.28 
 -11  -2   8   11.22    0.30 
 -11  -2   8   11.92    0.31 
  11  -2  -8   11.48    0.34 
  11   2  -8   11.91    0.33 
 -11   2   8   12.82    0.33 
 -10  -2   8    1.65    0.12 
 -10  -2   8    1.63    0.13 
  10  -2  -8    1.82    0.11 
  10  -2  -8    1.79    0.15 
  10   2  -8    0.76    0.10 
 -10   2   8    0.95    0.11 
  -9  -2   8    6.64    0.21 
  -9  -2   8    6.85    0.21 
   9  -2  -8    6.46    0.23 
   9  -2  -8    6.33    0.18 
  -9   2   8    6.68    0.22 
   9   2  -8    6.33    0.22 
   8  -2  -8    3.44    0.13 
   8  -2  -8    3.51    0.17 
  -8  -2   8    3.66    0.15 
  -8  -2   8    3.57    0.15 
  -8   2   8    4.30    0.17 
   8   2  -8    4.49    0.18 
   7  -2  -8    1.72    0.12 
   7  -2  -8    1.58    0.09 
  -7  -2   8    1.65    0.11 
  -7  -2   8    1.73    0.11 
  -7   2   8    1.21    0.10 
   7   2  -8    1.17    0.10 
   6  -2  -8    3.82    0.16 
  -6  -2   8    3.95    0.15 
   6  -2  -8    4.02    0.13 
  -6  -2   8    3.89    0.15 
  -6   2   8    3.78    0.15 
   6   2  -8    3.84    0.15 
   5  -2  -8    9.83    0.21 
  -5  -2   8    9.44    0.23 
  -5  -2   8    9.53    0.24 
  -5   2   8   10.30    0.24 
   5   2  -8   10.05    0.24 
   4  -2  -8   30.31    0.54 
  -4  -2   8   29.93    0.51 
   4  -2  -8   30.27    0.49 
  -4  -2   8   30.00    0.52 
   4   2  -8   31.23    0.52 
  -4   2   8   30.54    0.52 
   4   2  -8   31.83    0.45 
   3  -2  -8   10.05    0.24 
  -3  -2   8    9.57    0.23 
   3  -2  -8    9.95    0.21 
  -3  -2   8    9.62    0.16 
  -3  -2   8    9.62    0.23 
   3   2  -8    8.67    0.20 
  -3   2   8    9.48    0.21 
  -2  -2   8   57.54    0.89 
   2  -2  -8   58.47    0.81 
  -2  -2   8   59.89    0.82 
  -2  -2   8   57.49    0.89 
   2  -2  -8   57.92    0.90 
   2   2  -8   65.60    0.96 
  -2   2   8   66.74    0.98 
  -2   2   8   66.19    0.98 
  -1  -2   8   10.45    0.19 
   1  -2  -8   10.55    0.18 
   1  -2  -8   10.42    0.24 
  -1  -2   8   10.17    0.23 
  -1   2   8   10.13    0.22 
  -1   2   8   10.20    0.22 
   1   2  -8   10.34    0.21 
   1   2  -8   10.33    0.24 
   0  -2   8   40.19    0.59 
   0  -2   8   39.54    0.63 
   0  -2  -8   39.28    0.64 
   0  -2  -8   39.46    0.58 
   0   2   8   29.61    0.50 
   0   2  -8   30.55    0.52 
   0   2  -8   30.22    0.46 
   0   2   8   29.51    0.48 
  -1  -2  -8   12.25    0.26 
   1  -2   8   12.75    0.24 
  -1  -2  -8   12.03    0.23 
   1   2   8   14.11    0.30 
   1   2   8   14.19    0.27 
  -1   2  -8   14.62    0.31 
  -1   2  -8   14.78    0.24 
   2  -2   8   22.84    0.41 
  -2  -2  -8   22.50    0.38 
   2  -2   8   23.14    0.39 
  -2  -2  -8   22.33    0.41 
   2   2   8   17.27    0.35 
  -2   2  -8   17.12    0.35 
   2   2   8   17.62    0.31 
  -2   2  -8   17.96    0.27 
   3  -2   8   13.36    0.27 
   3  -2   8   13.22    0.28 
  -3  -2  -8   13.06    0.26 
  -3  -2  -8   13.00    0.28 
  -3   2  -8   12.57    0.29 
   3   2   8   13.05    0.24 
   3   2   8   12.38    0.29 
   4  -2   8   10.42    0.24 
  -4  -2  -8    9.89    0.22 
   4  -2   8    9.59    0.23 
  -4  -2  -8   10.02    0.23 
  -4   2  -8   11.77    0.28 
   4   2   8   11.39    0.29 
   4   2   8   12.14    0.22 
   5  -2   8   10.80    0.26 
   5  -2   8   10.73    0.25 
  -5  -2  -8   10.81    0.25 
  -5  -2  -8   10.42    0.25 
  -5   2  -8   12.35    0.29 
   6  -2   8   17.80    0.35 
  -6  -2  -8   16.45    0.35 
   6  -2   8   17.23    0.37 
  -6  -2  -8   17.66    0.35 
   6   2   8   15.74    0.37 
  -6   2  -8   15.15    0.34 
  -7  -2  -8    1.71    0.11 
   7  -2   8    1.82    0.13 
   7  -2   8    1.75    0.12 
  -7  -2  -8    1.64    0.12 
  -7   2  -8    2.20    0.14 
   7   2   8    2.25    0.15 
  -8  -2  -8    1.78    0.12 
   8  -2   8    1.97    0.13 
   8  -2   8    1.79    0.13 
  -8  -2  -8    1.98    0.13 
   8   2   8    1.84    0.15 
  -8   2  -8    1.59    0.14 
  -9  -2  -8   12.61    0.30 
  -9  -2  -8   12.70    0.32 
   9  -2   8   12.84    0.34 
   9   2   8   14.63    0.39 
  -9   2  -8   14.21    0.33 
  -9   2  -8   14.38    0.36 
 -10  -2  -8    9.47    0.26 
  10  -2   8    9.45    0.29 
 -10  -2  -8    9.07    0.28 
  10   2   8    9.19    0.31 
 -10   2  -8    8.15    0.27 
 -10   2  -8    8.85    0.26 
  11  -2   8    7.87    0.28 
 -11  -2  -8    7.73    0.24 
 -11  -2  -8    7.50    0.27 
 -11   2  -8    7.39    0.26 
 -11   2  -8    7.32    0.24 
  11   2   8    6.89    0.29 
 -12  -2  -8   17.64    0.43 
  12  -2   8   16.86    0.44 
 -12   2  -8   18.27    0.42 
  12   2   8   19.15    0.51 
  12   2   8   19.06    0.50 
 -12   2  -8   19.10    0.45 
  13  -2   8    1.45    0.17 
 -13  -2  -8    1.40    0.16 
 -13   2  -8    1.02    0.14 
 -13   2  -8    1.19    0.13 
  13   2   8    0.99    0.15 
  14  -2   8    2.96    0.22 
 -14  -2  -8    2.76    0.22 
  14   2   8    4.00    0.26 
 -14   2  -8    3.77    0.23 
 -15  -2  -8    0.13    0.12 
  15  -2   8    0.12    0.11 
 -15   2  -8    0.11    0.11 
  15   2   8   -0.03    0.11 
  16  -2   8    2.97    0.26 
 -16  -2  -8    2.59    0.28 
 -16   2  -8    1.62    0.18 
  16   2   8    1.61    0.20 
 -17  -3   8    4.88    0.31 
  17   3  -8    3.84    0.29 
 -17   3   8    3.53    0.25 
 -16  -3   8    1.20    0.16 
 -16   3   8    1.65    0.18 
  16   3  -8    1.58    0.19 
 -15  -3   8    2.08    0.21 
  15   3  -8    2.66    0.24 
 -15   3   8    2.90    0.22 
 -14  -3   8   13.82    0.40 
  14  -3  -8   13.31    0.36 
  14  -3  -8   13.00    0.42 
  14   3  -8   13.51    0.41 
 -14   3   8   13.68    0.40 
 -13  -3   8    2.62    0.20 
  13  -3  -8    2.27    0.17 
  13  -3  -8    2.61    0.20 
  13   3  -8    3.43    0.22 
 -13   3   8    3.61    0.22 
  12  -3  -8    1.60    0.17 
 -12  -3   8    1.43    0.17 
  12  -3  -8    1.66    0.14 
 -12   3   8    1.84    0.17 
  12   3  -8    1.85    0.18 
 -11  -3   8   11.67    0.33 
  11  -3  -8   11.77    0.30 
  11  -3  -8   11.81    0.35 
 -11   3   8   11.78    0.33 
  11   3  -8   11.69    0.34 
 -10  -3   8    1.22    0.14 
  10  -3  -8    1.22    0.14 
  10  -3  -8    1.46    0.12 
 -10   3   8    1.35    0.14 
  10   3  -8    1.43    0.15 
   9  -3  -8    7.60    0.22 
  -9  -3   8    7.69    0.22 
   9  -3  -8    7.49    0.26 
  -9  -3   8    7.23    0.24 
  -9   3   8    8.53    0.26 
   9   3  -8    8.19    0.27 
   8  -3  -8   17.29    0.40 
   8  -3  -8   16.88    0.35 
  -8  -3   8   17.11    0.35 
  -8  -3   8   16.84    0.38 
   8   3  -8   17.28    0.39 
  -8   3   8   17.13    0.38 
  -7  -3   8   12.58    0.31 
   7  -3  -8   12.72    0.32 
  -7  -3   8   12.76    0.29 
   7  -3  -8   12.85    0.29 
   7   3  -8   10.75    0.28 
  -7   3   8   10.90    0.28 
  -6  -3   8   10.43    0.27 
   6  -3  -8   10.53    0.25 
  -6  -3   8   10.66    0.25 
   6  -3  -8   10.72    0.28 
  -6   3   8   12.34    0.29 
   6   3  -8   12.10    0.29 
  -5  -3   8   13.07    0.28 
  -5  -3   8   12.01    0.29 
   5  -3  -8   12.25    0.30 
   5  -3  -8   12.65    0.28 
  -5   3   8   13.57    0.30 
   5   3  -8   13.38    0.30 
  -4  -3   8    1.61    0.10 
  -4  -3   8    1.37    0.11 
   4  -3  -8    1.83    0.12 
   4  -3  -8    1.59    0.11 
   4   3  -8    1.66    0.08 
  -4   3   8    1.72    0.11 
   4   3  -8    1.60    0.10 
   3  -3  -8   14.84    0.31 
  -3  -3   8   15.12    0.31 
   3  -3  -8   14.77    0.33 
  -3  -3   8   14.75    0.26 
  -3  -3   8   15.16    0.32 
  -3   3   8   14.76    0.31 
   3   3  -8   14.70    0.30 
  -2  -3   8    1.39    0.10 
   2  -3  -8    1.54    0.11 
  -2  -3   8    1.55    0.08 
  -2   3   8    1.67    0.10 
   2   3  -8    1.68    0.09 
  -2   3   8    1.72    0.10 
   1  -3  -8   47.50    0.66 
  -1  -3   8   46.33    0.75 
  -1  -3   8   46.58    0.71 
   1  -3  -8   47.49    0.76 
   1   3  -8   50.48    0.81 
  -1   3   8   51.72    0.81 
   1   3  -8   50.77    0.76 
  -1   3   8   50.09    0.78 
   0  -3  -8   14.33    0.32 
   0  -3  -8   14.69    0.24 
   0  -3   8   14.14    0.30 
   0  -3   8   14.25    0.28 
   0   3  -8   16.65    0.29 
   0   3   8   15.91    0.34 
   0   3   8   16.25    0.31 
   0   3  -8   16.26    0.35 
   1  -3   8   20.73    0.37 
  -1  -3  -8   21.11    0.35 
   1  -3   8   21.12    0.40 
  -1  -3  -8   20.99    0.41 
  -1   3  -8   23.23    0.44 
   1   3   8   22.76    0.39 
   1   3   8   22.24    0.44 
  -1   3  -8   23.44    0.37 
   2  -3   8   18.00    0.34 
  -2  -3  -8   18.01    0.32 
  -2  -3  -8   17.88    0.37 
   2  -3   8   17.79    0.36 
  -2   3  -8   19.31    0.40 
   2   3   8   19.77    0.34 
   2   3   8   19.87    0.40 
  -3  -3  -8   18.38    0.38 
   3  -3   8   18.35    0.36 
  -3  -3  -8   18.27    0.34 
   3  -3   8   18.44    0.37 
  -3   3  -8   20.11    0.41 
   3   3   8   20.02    0.42 
  -4  -3  -8    8.00    0.23 
   4  -3   8    7.69    0.22 
   4  -3   8    7.91    0.22 
  -4  -3  -8    8.06    0.20 
  -4   3  -8    5.98    0.21 
   4   3   8    6.59    0.22 
   5  -3   8   21.77    0.43 
  -5  -3  -8   22.07    0.41 
  -5  -3  -8   21.87    0.43 
   5  -3   8   22.13    0.43 
   5   3   8   25.90    0.52 
  -5   3  -8   25.65    0.50 
  -6  -3  -8    2.31    0.13 
   6  -3   8    2.41    0.14 
   6  -3   8    2.45    0.14 
  -6  -3  -8    2.04    0.14 
   6   3   8    2.08    0.15 
  -6   3  -8    2.09    0.14 
   7  -3   8   28.02    0.53 
   7  -3   8   27.59    0.54 
  -7  -3  -8   27.38    0.52 
  -7  -3  -8   27.27    0.52 
   7   3   8   23.79    0.52 
  -7   3  -8   24.13    0.49 
   8  -3   8    7.30    0.25 
  -8  -3  -8    7.26    0.24 
  -8  -3  -8    7.51    0.24 
   8  -3   8    7.87    0.24 
  -8   3  -8    7.06    0.23 
   8   3   8    6.96    0.27 
  -8   3  -8    7.08    0.25 
  -9  -3  -8    0.12    0.08 
   9  -3   8    0.06    0.07 
  -9  -3  -8    0.10    0.07 
  -9   3  -8    0.17    0.08 
  -9   3  -8    0.20    0.09 
   9   3   8    0.07    0.09 
  10  -3   8    3.82    0.21 
 -10  -3  -8    3.96    0.20 
 -10  -3  -8    4.09    0.20 
 -10   3  -8    3.18    0.19 
 -10   3  -8    3.27    0.19 
  10   3   8    3.26    0.22 
  11  -3   8   13.54    0.39 
 -11  -3  -8   13.19    0.36 
 -11  -3  -8   13.13    0.35 
 -11   3  -8   13.77    0.36 
  11   3   8   14.11    0.42 
 -11   3  -8   14.52    0.38 
  12  -3   8    0.32    0.11 
 -12  -3  -8    0.35    0.11 
 -12  -3  -8    0.11    0.10 
 -12   3  -8    0.45    0.11 
  12   3   8    0.56    0.13 
 -12   3  -8    0.49    0.11 
  13  -3   8    6.43    0.30 
 -13  -3  -8    6.65    0.29 
 -13   3  -8    6.81    0.29 
 -13   3  -8    7.18    0.28 
  13   3   8    7.47    0.33 
  13   3   8    6.81    0.27 
  14  -3   8    0.51    0.13 
 -14  -3  -8    0.64    0.14 
  14   3   8    0.52    0.15 
 -14   3  -8    0.44    0.13 
 -14   3  -8    0.36    0.12 
 -15  -3  -8    2.10    0.23 
  15  -3   8    2.34    0.23 
  15   3   8    3.05    0.27 
  16  -4  -8    1.06    0.20 
  15  -4  -8    0.44    0.12 
 -15  -4   8    0.37    0.13 
  15   4  -8    0.19    0.13 
 -15   4   8    0.01    0.11 
  14  -4  -8    0.28    0.11 
 -14  -4   8    0.25    0.12 
 -14   4   8    0.83    0.14 
  14   4  -8    0.63    0.14 
  13  -4  -8    3.44    0.21 
 -13  -4   8    3.00    0.23 
 -13   4   8    3.11    0.23 
  13   4  -8    3.02    0.23 
 -12  -4   8    4.02    0.23 
  12  -4  -8    3.63    0.21 
  12  -4  -8    3.63    0.21 
 -12   4   8    2.99    0.21 
  12   4  -8    3.14    0.23 
 -11  -4   8    2.01    0.18 
  11  -4  -8    1.89    0.16 
  11  -4  -8    1.87    0.16 
  11   4  -8    2.20    0.19 
 -11   4   8    2.33    0.19 
 -10  -4   8   13.22    0.36 
  10  -4  -8   13.64    0.35 
  10  -4  -8   14.09    0.37 
 -10   4   8   12.24    0.34 
  10   4  -8   11.79    0.35 
   9  -4  -8    2.22    0.16 
   9  -4  -8    2.52    0.16 
  -9  -4   8    2.07    0.17 
  -9   4   8    2.69    0.17 
   9   4  -8    2.39    0.17 
   8  -4  -8   19.54    0.42 
   8  -4  -8   18.80    0.43 
  -8  -4   8   18.94    0.43 
   8   4  -8   20.49    0.46 
  -8   4   8   20.92    0.45 
  -7  -4   8    8.15    0.26 
  -7  -4   8    8.15    0.22 
   7  -4  -8    8.20    0.26 
   7  -4  -8    8.31    0.25 
  -7   4   8    8.36    0.26 
   7   4  -8    8.34    0.26 
   6  -4  -8   10.26    0.27 
  -6  -4   8   10.14    0.28 
   6  -4  -8    9.76    0.28 
  -6  -4   8   10.21    0.25 
  -6   4   8   13.03    0.32 
   6   4  -8   12.71    0.32 
  -5  -4   8   12.04    0.31 
   5  -4  -8   11.85    0.30 
  -5  -4   8   11.73    0.28 
   5  -4  -8   11.86    0.31 
   5   4  -8   12.07    0.30 
  -5   4   8   11.88    0.30 
   4  -4  -8    1.59    0.13 
  -4  -4   8    1.43    0.13 
   4  -4  -8    1.34    0.12 
  -4  -4   8    1.47    0.11 
   4   4  -8    2.41    0.14 
  -4   4   8    2.65    0.14 
   3  -4  -8    2.02    0.13 
  -3  -4   8    2.01    0.10 
  -3  -4   8    1.91    0.13 
   3  -4  -8    1.85    0.14 
  -3  -4   8    2.12    0.12 
  -3   4   8    1.76    0.12 
   3   4  -8    1.87    0.12 
  -2  -4   8   14.79    0.30 
  -2  -4   8   14.52    0.32 
  -2  -4   8   14.48    0.34 
   2  -4  -8   14.62    0.34 
  -2   4   8   15.32    0.35 
   2   4  -8   15.30    0.31 
  -2   4   8   14.44    0.32 
   1  -4  -8    0.15    0.07 
  -1  -4   8    0.18    0.06 
  -1  -4   8    0.16    0.05 
   1   4  -8    0.46    0.08 
   1   4  -8    0.44    0.07 
  -1   4   8    0.41    0.07 
  -1   4   8    0.31    0.08 
   0  -4   8    1.31    0.10 
   0  -4  -8    1.29    0.12 
   0  -4   8    1.33    0.11 
   0   4  -8    1.16    0.12 
   0   4   8    0.85    0.10 
   0   4   8    1.12    0.09 
   0   4  -8    1.22    0.09 
   1  -4   8    0.48    0.08 
  -1  -4  -8    0.51    0.09 
   1  -4   8    0.47    0.07 
  -1   4  -8    1.06    0.11 
   1   4   8    1.05    0.10 
   1   4   8    1.15    0.13 
   2  -4   8    5.96    0.19 
  -2  -4  -8    6.21    0.22 
   2  -4   8    6.28    0.21 
  -2   4  -8    4.14    0.18 
   2   4   8    3.80    0.18 
  -3  -4  -8   21.80    0.39 
  -3  -4  -8   21.19    0.45 
   3  -4   8   21.33    0.44 
   3  -4   8   22.24    0.43 
  -3   4  -8   23.80    0.49 
   3   4   8   23.57    0.50 
  -4  -4  -8   17.11    0.39 
   4  -4   8   16.40    0.37 
   4  -4   8   16.65    0.38 
  -4  -4  -8   16.92    0.34 
   4   4   8   16.70    0.41 
  -4   4  -8   16.81    0.39 
  -5  -4  -8   15.17    0.37 
   5  -4   8   15.03    0.36 
   5  -4   8   14.73    0.35 
  -5  -4  -8   14.86    0.32 
  -5   4  -8   13.45    0.34 
   5   4   8   13.90    0.37 
   6  -4   8   10.38    0.30 
   6  -4   8   11.02    0.30 
  -6  -4  -8   10.36    0.27 
  -6  -4  -8   10.18    0.30 
  -6   4  -8    7.82    0.26 
   6   4   8    7.67    0.28 
   7  -4   8    3.89    0.19 
  -7  -4  -8    3.88    0.17 
  -7  -4  -8    3.71    0.20 
   7   4   8    3.47    0.21 
  -7   4  -8    3.52    0.19 
  -7   4  -8    3.37    0.19 
   8  -4   8    4.04    0.21 
  -8  -4  -8    4.57    0.21 
  -8  -4  -8    4.16    0.19 
  -8   4  -8    6.15    0.24 
  -8   4  -8    6.03    0.24 
   8   4   8    6.10    0.27 
  -9  -4  -8    1.19    0.13 
   9  -4   8    1.16    0.14 
  -9  -4  -8    1.13    0.14 
  -9   4  -8    1.13    0.13 
  -9   4  -8    1.32    0.15 
   9   4   8    1.01    0.14 
 -10  -4  -8    5.39    0.25 
 -10  -4  -8    5.12    0.23 
  10  -4   8    5.52    0.25 
  10   4   8    5.18    0.27 
 -10   4  -8    5.25    0.23 
 -10   4  -8    5.20    0.25 
 -11  -4  -8    1.71    0.19 
 -11  -4  -8    1.38    0.15 
  11  -4   8    1.68    0.18 
  11   4   8    1.84    0.20 
 -11   4  -8    1.49    0.16 
 -12  -4  -8    2.14    0.20 
 -12  -4  -8    1.84    0.20 
  12  -4   8    1.65    0.18 
  12   4   8    1.96    0.23 
 -12   4  -8    2.36    0.22 
  13  -4   8    2.61    0.22 
 -13  -4  -8    2.60    0.22 
  13   4   8    2.45    0.21 
 -13   4  -8    2.70    0.22 
  13   4   8    3.24    0.26 
 -14  -4  -8    1.81    0.21 
 -14   4  -8    1.52    0.18 
  14   4   8    1.99    0.21 
  14   4   8    1.30    0.20 
  14  -5  -8    1.25    0.17 
 -13  -5   8    3.32    0.25 
  13  -5  -8    3.59    0.23 
  13   5  -8    4.26    0.28 
 -13   5   8    3.63    0.26 
 -12  -5   8    0.96    0.15 
  12  -5  -8    0.82    0.14 
  12   5  -8    1.95    0.22 
 -12   5   8    1.09    0.16 
  11  -5  -8    4.39    0.23 
 -11  -5   8    4.21    0.24 
  11   5  -8    4.61    0.27 
 -11   5   8    5.06    0.26 
 -10  -5   8    0.67    0.12 
  10  -5  -8    0.57    0.12 
  10  -5  -8    0.51    0.11 
 -10   5   8    0.58    0.12 
  10   5  -8    0.33    0.12 
  -9  -5   8    7.13    0.28 
   9  -5  -8    7.00    0.26 
   9  -5  -8    7.11    0.27 
   9   5  -8    6.12    0.27 
  -9   5   8    6.20    0.26 
   8  -5  -8    2.63    0.18 
  -8  -5   8    2.31    0.18 
   8  -5  -8    2.60    0.18 
   8   5  -8    1.90    0.18 
  -8   5   8    1.88    0.17 
   7  -5  -8    5.08    0.23 
  -7  -5   8    5.27    0.23 
   7  -5  -8    5.48    0.23 
  -7   5   8    4.03    0.21 
   7   5  -8    4.15    0.21 
  -6  -5   8    7.63    0.27 
   6  -5  -8    7.87    0.27 
   6  -5  -8    7.57    0.26 
  -6   5   8    6.97    0.25 
   6   5  -8    6.62    0.25 
  -5  -5   8    4.35    0.18 
   5  -5  -8    4.74    0.22 
  -5  -5   8    4.39    0.21 
   5  -5  -8    4.16    0.20 
   5   5  -8    4.90    0.21 
  -5   5   8    5.12    0.21 
   4  -5  -8    5.86    0.23 
  -4  -5   8    6.14    0.21 
   4  -5  -8    6.29    0.24 
  -4  -5   8    6.28    0.24 
   4   5  -8    8.40    0.26 
  -4   5   8    8.03    0.25 
  -3  -5   8    1.36    0.13 
   3  -5  -8    1.53    0.15 
  -3  -5   8    1.26    0.14 
  -3   5   8    2.01    0.15 
   3   5  -8    2.04    0.14 
  -3   5   8    1.98    0.14 
  -2  -5   8    0.41    0.08 
   2  -5  -8    0.54    0.10 
  -2  -5   8    0.54    0.10 
  -2  -5   8    0.58    0.10 
   2   5  -8    0.75    0.09 
   2   5  -8    0.70    0.11 
  -2   5   8    0.86    0.11 
  -2   5   8    0.98    0.10 
  -1  -5   8    0.89    0.10 
  -1  -5   8    0.92    0.10 
   1  -5  -8    0.87    0.12 
  -1   5   8    1.09    0.11 
   1   5  -8    1.17    0.12 
  -1   5   8    0.96    0.12 
   0  -5  -8    3.39    0.19 
   0  -5   8    3.10    0.17 
   0  -5   8    3.20    0.16 
   0   5  -8    2.59    0.17 
   0   5   8    2.61    0.18 
   1  -5   8   23.44    0.47 
   1  -5   8   22.83    0.48 
  -1  -5  -8   22.92    0.50 
  -1   5  -8   24.38    0.51 
   1   5   8   23.15    0.52 
  -2  -5  -8    6.61    0.26 
   2  -5   8    6.84    0.24 
   2  -5   8    6.70    0.24 
   2   5   8    7.37    0.27 
  -2   5  -8    7.08    0.26 
   3  -5   8   18.45    0.43 
   3  -5   8   18.56    0.42 
  -3  -5  -8   19.04    0.45 
  -3   5  -8   17.89    0.42 
   3   5   8   17.41    0.44 
   4  -5   8    0.47    0.10 
  -4  -5  -8    0.54    0.11 
   4  -5   8    0.26    0.09 
  -4   5  -8    0.79    0.11 
   4   5   8    0.86    0.13 
   5  -5   8    5.60    0.23 
  -5  -5  -8    5.78    0.25 
   5  -5   8    6.06    0.24 
  -5   5  -8    6.31    0.24 
  -5   5  -8    6.40    0.25 
   5   5   8    6.48    0.28 
   6  -5   8    0.65    0.12 
  -6  -5  -8    0.84    0.13 
  -6   5  -8    0.67    0.12 
   6   5   8    0.77    0.13 
  -7  -5  -8    7.20    0.29 
   7  -5   8    7.64    0.28 
   7   5   8    7.21    0.31 
  -7   5  -8    7.00    0.28 
   8  -5   8    0.95    0.14 
  -8  -5  -8    1.05    0.15 
  -8   5  -8    0.67    0.13 
   8   5   8    0.74    0.15 
  -9  -5  -8    7.98    0.28 
  -9  -5  -8    7.65    0.31 
   9  -5   8    7.78    0.31 
  -9   5  -8    6.30    0.28 
   9   5   8    6.28    0.31 
  10  -5   8    1.21    0.16 
 -10  -5  -8    1.49    0.17 
 -10  -5  -8    1.34    0.15 
  10   5   8    1.02    0.17 
 -10   5  -8    0.82    0.14 
 -11  -5  -8    0.70    0.13 
  11  -5   8    0.37    0.13 
 -11  -5  -8    0.52    0.14 
  11   5   8    1.15    0.17 
 -11   5  -8    1.20    0.17 
  12  -5   8    0.10    0.17 
 -12  -5  -8   -0.23    0.11 
 -12  -5  -8    0.14    0.11 
 -12   5  -8   -0.04    0.12 
  12   5   8   -0.02    0.12 
 -13  -5  -8    0.77    0.16 
 -11  -6   8    0.29    0.13 
  11  -6  -8    0.20    0.12 
  11   6  -8    0.00    0.12 
 -11   6   8    0.37    0.21 
 -10  -6   8    6.29    0.30 
  10  -6  -8    6.56    0.29 
 -10   6   8    6.39    0.30 
  10   6  -8    6.69    0.32 
   9  -6  -8    0.50    0.13 
  -9  -6   8    0.48    0.13 
  -9   6   8    0.16    0.11 
   9   6  -8    0.29    0.12 
  -8  -6   8    4.53    0.25 
   8  -6  -8    4.60    0.25 
   8  -6  -8    4.82    0.24 
  -8   6   8    5.94    0.28 
   8   6  -8    6.04    0.28 
  -7  -6   8    4.35    0.24 
   7  -6  -8    4.62    0.24 
   7  -6  -8    4.56    0.23 
   7   6  -8    4.24    0.24 
  -7   6   8    3.93    0.23 
   6  -6  -8    2.14    0.20 
  -6  -6   8    2.82    0.20 
   6  -6  -8    2.71    0.19 
   6   6  -8    2.60    0.20 
  -6   6   8    2.71    0.19 
  -5  -6   8    2.45    0.19 
   5  -6  -8    2.73    0.20 
   5  -6  -8    2.36    0.19 
  -5   6   8    2.42    0.18 
   5   6  -8    2.38    0.19 
  -4  -6   8    1.62    0.17 
   4  -6  -8    1.65    0.17 
   4  -6  -8    1.68    0.18 
   4   6  -8    1.23    0.14 
  -4   6   8    1.39    0.16 
  -4   6   8    1.33    0.15 
  -3  -6   8    0.86    0.11 
  -3  -6   8    0.94    0.13 
   3  -6  -8    1.06    0.14 
  -3   6   8    0.64    0.13 
  -3   6   8    0.87    0.13 
  -2  -6   8    0.37    0.09 
   2  -6  -8    0.30    0.11 
   2   6  -8    0.35    0.10 
  -2   6   8    0.53    0.11 
  -1  -6   8    0.39    0.10 
   1  -6  -8    0.36    0.11 
   1   6  -8    0.39    0.11 
  -1   6   8    0.36    0.11 
   0  -6   8    0.59    0.11 
   0  -6   8    0.48    0.16 
   0  -6  -8    0.42    0.11 
   0   6   8    0.25    0.10 
   0   6  -8    0.07    0.09 
   1  -6   8    0.80    0.11 
  -1  -6  -8    0.89    0.14 
   1  -6   8    0.90    0.12 
   1   6   8    1.55    0.17 
  -2  -6  -8    2.56    0.21 
   2  -6   8    2.51    0.18 
   2  -6   8    2.70    0.19 
  -2   6  -8    4.16    0.22 
   2   6   8    3.89    0.23 
   3  -6   8    3.55    0.21 
  -3  -6  -8    4.06    0.24 
  -3   6  -8    3.69    0.22 
   3   6   8    3.66    0.23 
   4  -6   8    6.95    0.28 
  -4  -6  -8    7.42    0.31 
   4   6   8    7.94    0.32 
  -4   6  -8    7.33    0.28 
   5  -6   8    2.81    0.21 
  -5  -6  -8    2.57    0.21 
   5   6   8    2.38    0.22 
  -5   6  -8    2.47    0.20 
   6  -6   8    7.75    0.31 
  -6  -6  -8    8.00    0.33 
   6   6   8    6.93    0.32 
  -6   6  -8    6.81    0.29 
  -7  -6  -8    0.58    0.14 
   7  -6   8    0.73    0.14 
  -7   6  -8    0.58    0.14 
   7   6   8    0.76    0.16 
  -8  -6  -8    4.54    0.28 
   8  -6   8    4.41    0.27 
  -8   6  -8    4.21    0.27 
   8   6   8    4.37    0.30 
  -9  -6  -8    0.88    0.19 
   9  -6   8    0.91    0.17 
   9   6   8    0.74    0.17 
  -8  -7   8    1.03    0.16 
  -7  -7   8    1.41    0.18 
   7   7  -8    1.38    0.18 
  -7   7   8    1.47    0.17 
   6  -7  -8    2.37    0.23 
  -6  -7   8    2.94    0.23 
  -6   7   8    3.11    0.23 
   5  -7  -8    1.09    0.16 
  -5  -7   8    1.67    0.23 
  -5   7   8    1.47    0.20 
   4  -7  -8    4.22    0.25 
  -4   7   8    4.43    0.27 
   3  -7  -8    0.47    0.13 
  -3   7   8    0.26    0.12 
   2  -7  -8    0.88    0.15 
  -2   7   8    0.68    0.14 
   1  -7  -8    1.14    0.16 
  -1   7   8    0.64    0.14 
   0  -7  -8    0.29    0.12 
   0   7   8    0.21    0.12 
   0   7  -8    0.18    0.11 
  -1  -7  -8    2.93    0.24 
   1   7   8    3.57    0.25 
  -1   7  -8    3.63    0.24 
  -2  -7  -8    0.36    0.13 
   2   7   8    0.05    0.12 
  -2   7  -8    0.25    0.12 
   3  -7   8    4.20    0.25 
  -3  -7  -8    4.86    0.29 
  -3   7  -8    4.22    0.26 
   3   7   8    3.55    0.26 
   4  -7   8    1.65    0.18 
   4   7   8    1.68    0.27 
  -4   7  -8    1.87    0.21 
   5  -7   8    2.25    0.22 
   6  -7   8    1.22    0.18 
  19   0  -9   -0.15    0.11 
  18   0  -9    1.75    0.20 
  17   0  -9    0.44    0.13 
  16   0  -9    1.41    0.17 
 -15   0   9    1.52    0.15 
 -15   0   9    1.62    0.15 
  15   0  -9    1.73    0.18 
  14   0  -9    0.20    0.10 
 -14   0   9    0.26    0.08 
 -14   0   9    0.28    0.09 
 -13   0   9   21.15    0.46 
  13   0  -9   21.06    0.49 
 -13   0   9   22.12    0.44 
 -12   0   9    1.35    0.13 
  12   0  -9    1.39    0.15 
 -12   0   9    1.24    0.11 
  11   0  -9    6.30    0.24 
 -11   0   9    6.39    0.20 
 -11   0   9    6.92    0.22 
  10   0  -9    6.31    0.23 
 -10   0   9    6.21    0.19 
 -10   0   9    6.53    0.21 
  -9   0   9   22.02    0.40 
   9   0  -9   21.88    0.45 
  -9   0   9   22.63    0.44 
   8   0  -9   22.32    0.44 
  -8   0   9   21.92    0.39 
  -8   0   9   21.34    0.42 
   8   0  -9   21.68    0.34 
   7   0  -9    2.10    0.12 
  -7   0   9    1.99    0.09 
   7   0  -9    1.85    0.06 
  -7   0   9    2.00    0.11 
  -6   0   9    4.78    0.14 
  -6   0   9    4.97    0.16 
   6   0  -9    5.12    0.10 
  -5   0   9    0.49    0.03 
  -5   0   9    0.56    0.06 
   5   0  -9    0.33    0.06 
  -5   0   9    0.36    0.06 
  -4   0   9   17.63    0.31 
   4   0  -9   17.50    0.35 
  -4   0   9   18.11    0.27 
   3   0  -9    0.43    0.06 
  -3   0   9    0.60    0.04 
  -3   0   9    0.47    0.06 
   3   0  -9    0.43    0.05 
   2   0  -9    1.19    0.08 
  -2   0   9    1.29    0.08 
  -2   0   9    1.36    0.06 
   2   0  -9    1.39    0.07 
   1   0  -9    1.62    0.08 
   1   0  -9    1.81    0.08 
  -1   0   9    1.67    0.09 
  -1   0   9    1.76    0.07 
   0   0   9   16.19    0.29 
   0   0  -9   15.79    0.30 
   0   0   9   16.17    0.31 
   0   0  -9   16.66    0.30 
  -1   0  -9   11.62    0.22 
   1   0   9   11.67    0.24 
  -1   0  -9   11.50    0.25 
   1   0   9   11.43    0.24 
  -2   0  -9    4.58    0.12 
   2   0   9    4.44    0.13 
   2   0   9    4.44    0.14 
  -2   0  -9    4.33    0.14 
  -3   0  -9   47.59    0.76 
   3   0   9   47.84    0.77 
  -3   0  -9   48.89    0.70 
   3   0   9   48.56    0.73 
  -4   0  -9    8.37    0.22 
   4   0   9    8.32    0.19 
   4   0   9    8.31    0.23 
  -4   0  -9    8.59    0.17 
  -5   0  -9   47.71    0.77 
  -5   0  -9   47.79    0.69 
   5   0   9   46.94    0.72 
   5   0   9   47.04    0.79 
   6   0   9    7.51    0.23 
  -6   0  -9    7.34    0.22 
  -6   0  -9    7.45    0.16 
   6   0   9    7.64    0.18 
   7   0   9   23.55    0.40 
   7   0   9   22.92    0.49 
  -7   0  -9   23.13    0.46 
  -8   0  -9   12.22    0.31 
   8   0   9   12.11    0.25 
   8   0   9   11.34    0.32 
  -9   0  -9   10.04    0.29 
   9   0   9    9.44    0.30 
  10   0   9    9.67    0.32 
 -10   0  -9    9.80    0.30 
  11   0   9    2.98    0.20 
 -11   0  -9    3.36    0.19 
  12   0   9    6.98    0.29 
 -12   0  -9    6.72    0.27 
 -13   0  -9    0.19    0.11 
  13   0   9    0.14    0.10 
 -14   0  -9    1.26    0.16 
  14   0   9    1.04    0.15 
  15   0   9    1.64    0.19 
 -15   0  -9    1.48    0.17 
  16   0   9    2.16    0.22 
 -16   0  -9    2.24    0.23 
 -19  -1   9    0.85    0.15 
  19   1  -9    1.27    0.21 
 -18  -1   9    1.33    0.16 
  18  -1  -9    1.11    0.19 
  18   1  -9    1.21    0.18 
  17  -1  -9    1.96    0.22 
 -17  -1   9    1.45    0.16 
  17   1  -9    1.27    0.17 
 -17   1   9    1.14    0.15 
 -16  -1   9    1.10    0.14 
  16  -1  -9    0.96    0.15 
  16   1  -9    0.86    0.15 
 -16   1   9    1.13    0.14 
  15  -1  -9   -0.03    0.09 
 -15  -1   9   -0.02    0.08 
  15   1  -9    0.02    0.10 
 -15   1   9    0.03    0.08 
  14  -1  -9    0.90    0.14 
 -14  -1   9    0.96    0.12 
  14   1  -9    0.91    0.13 
 -14   1   9    1.30    0.14 
  13  -1  -9    2.42    0.19 
 -13  -1   9    2.12    0.15 
 -13  -1   9    2.37    0.16 
  13   1  -9    2.54    0.18 
 -13   1   9    2.38    0.16 
  12  -1  -9    2.79    0.18 
 -12  -1   9    3.19    0.17 
 -12  -1   9    3.03    0.16 
  12   1  -9    1.76    0.16 
 -12   1   9    1.74    0.14 
 -11  -1   9   17.16    0.39 
 -11  -1   9   17.59    0.38 
  11  -1  -9   17.54    0.42 
 -11   1   9   16.84    0.38 
  11   1  -9   16.30    0.39 
 -11   1   9   15.56    0.34 
  10  -1  -9    9.41    0.21 
  10  -1  -9    8.89    0.28 
 -10  -1   9    9.47    0.26 
 -10  -1   9    9.27    0.25 
 -10   1   9   11.90    0.25 
 -10   1   9   11.28    0.29 
   9  -1  -9   24.49    0.50 
  -9  -1   9   24.13    0.47 
  -9  -1   9   23.58    0.45 
   9  -1  -9   24.08    0.40 
  -9   1   9   22.15    0.44 
  -9   1   9   22.54    0.38 
   8  -1  -9    3.07    0.10 
  -8  -1   9    3.26    0.13 
   8  -1  -9    2.98    0.16 
  -8  -1   9    3.52    0.15 
   8   1  -9    2.09    0.13 
  -8   1   9    2.45    0.13 
  -8   1   9    2.33    0.09 
  -7  -1   9   45.50    0.75 
   7  -1  -9   45.75    0.67 
   7  -1  -9   44.06    0.76 
  -7  -1   9   44.92    0.71 
  -7   1   9   41.36    0.69 
   7   1  -9   40.90    0.69 
  -7   1   9   40.92    0.62 
  -6  -1   9    3.68    0.15 
   6  -1  -9    3.91    0.16 
   6  -1  -9    3.85    0.11 
  -6  -1   9    3.77    0.13 
  -6   1   9    4.55    0.12 
  -6   1   9    4.37    0.15 
  -5  -1   9   46.01    0.75 
  -5  -1   9   45.15    0.71 
   5  -1  -9   46.99    0.76 
   5  -1  -9   45.66    0.67 
  -5   1   9   47.84    0.77 
  -5   1   9   49.86    0.71 
   5   1  -9   47.99    0.77 
   4  -1  -9    2.17    0.08 
   4  -1  -9    2.01    0.11 
  -4  -1   9    1.96    0.10 
  -4  -1   9    2.01    0.11 
   4   1  -9    2.93    0.12 
  -4   1   9    2.87    0.12 
   3  -1  -9    8.49    0.21 
   3  -1  -9    8.44    0.17 
  -3  -1   9    8.25    0.22 
  -3  -1   9    8.24    0.20 
  -3   1   9    7.53    0.16 
  -3   1   9    7.69    0.19 
   3   1  -9    7.45    0.19 
  -2  -1   9   29.12    0.52 
   2  -1  -9   30.33    0.52 
   2  -1  -9   31.10    0.47 
  -2  -1   9   30.88    0.43 
  -2   1   9   27.89    0.47 
  -2   1   9   26.67    0.43 
   2   1  -9   27.42    0.45 
   2   1  -9   27.34    0.46 
  -1  -1   9    4.28    0.10 
   1  -1  -9    4.20    0.12 
  -1  -1   9    4.14    0.14 
   1  -1  -9    4.06    0.14 
  -1   1   9    4.22    0.12 
   1   1  -9    4.02    0.12 
  -1   1   9    4.19    0.13 
   1   1  -9    4.03    0.13 
   0  -1   9   23.64    0.42 
   0  -1  -9   24.07    0.40 
   0  -1  -9   23.97    0.42 
   0  -1   9   24.30    0.39 
   0   1   9   24.62    0.43 
   0   1  -9   25.14    0.40 
   0   1  -9   24.01    0.43 
   0   1   9   25.10    0.42 
  -1  -1  -9    1.56    0.08 
   1  -1   9    1.43    0.07 
   1  -1   9    1.56    0.09 
  -1  -1  -9    1.53    0.08 
   1   1   9    1.16    0.08 
  -1   1  -9    1.28    0.09 
  -1   1  -9    1.31    0.07 
   1   1   9    1.27    0.08 
  -2  -1  -9   32.09    0.52 
  -2  -1  -9   31.76    0.51 
   2  -1   9   32.04    0.53 
   2  -1   9   31.79    0.52 
   2   1   9   28.67    0.51 
   2   1   9   29.00    0.48 
  -2   1  -9   29.09    0.51 
  -2   1  -9   29.64    0.44 
  -3  -1  -9    2.44    0.11 
   3  -1   9    2.32    0.10 
   3  -1   9    2.13    0.11 
  -3  -1  -9    2.53    0.10 
   3   1   9    2.43    0.12 
   3   1   9    2.59    0.10 
  -3   1  -9    2.57    0.13 
  -3   1  -9    2.64    0.07 
  -4  -1  -9   39.81    0.65 
   4  -1   9   40.24    0.66 
   4  -1   9   39.48    0.63 
  -4  -1  -9   39.60    0.62 
  -4   1  -9   37.09    0.63 
   4   1   9   38.01    0.65 
   4   1   9   37.43    0.57 
  -5  -1  -9    8.75    0.20 
  -5  -1  -9    8.80    0.22 
   5  -1   9    8.59    0.21 
   5  -1   9    8.68    0.23 
   5   1   9    8.31    0.24 
   5   1   9    8.59    0.18 
  -5   1  -9    8.21    0.23 
  -6  -1  -9   26.55    0.48 
   6  -1   9   25.13    0.49 
  -6  -1  -9   26.22    0.44 
   6  -1   9   25.87    0.45 
   6   1   9   30.31    0.58 
  -6   1  -9   30.54    0.56 
   6   1   9   30.60    0.47 
   7  -1   9   10.08    0.24 
  -7  -1  -9   10.26    0.23 
   7  -1   9   10.40    0.28 
  -7  -1  -9    9.98    0.27 
  -7   1  -9   10.65    0.28 
   7   1   9   10.73    0.30 
   8  -1   9   12.06    0.27 
  -8  -1  -9   11.92    0.30 
  -8  -1  -9   11.91    0.26 
   8  -1   9   12.24    0.32 
   8   1   9   13.07    0.35 
  -8   1  -9   12.96    0.33 
  -9  -1  -9    7.44    0.25 
   9  -1   9    7.72    0.21 
   9  -1   9    7.61    0.26 
  -9   1  -9    8.24    0.26 
 -10  -1  -9    0.68    0.11 
  10  -1   9    0.73    0.11 
 -10   1  -9    0.22    0.07 
  10   1   9    0.10    0.08 
 -10   1  -9    0.09    0.08 
  11  -1   9    0.64    0.12 
 -11  -1  -9    0.32    0.10 
 -11   1  -9    0.37    0.08 
 -11   1  -9    0.41    0.10 
  11   1   9    0.35    0.10 
 -12  -1  -9    1.71    0.18 
  12  -1   9    1.41    0.16 
 -12   1  -9    1.23    0.14 
  12   1   9    1.00    0.15 
  13  -1   9    0.43    0.12 
 -13  -1  -9    0.36    0.11 
  13   1   9    0.32    0.12 
 -13   1  -9    0.36    0.11 
 -14  -1  -9    2.62    0.21 
  14  -1   9    2.28    0.21 
 -14   1  -9    3.29    0.23 
  14   1   9    2.97    0.24 
 -15  -1  -9    0.11    0.12 
  15  -1   9    0.21    0.12 
  15   1   9    0.16    0.13 
 -15   1  -9    0.49    0.14 
 -16  -1  -9    0.99    0.17 
  16  -1   9    1.15    0.18 
 -16   1  -9    0.37    0.14 
  16   1   9    0.27    0.14 
 -18  -2   9    0.15    0.13 
  18   2  -9    0.07    0.13 
 -18   2   9    0.08    0.12 
 -17  -2   9    0.40    0.13 
 -17   2   9    0.51    0.13 
  17   2  -9    0.59    0.15 
  16  -2  -9    2.55    0.23 
 -16  -2   9    2.48    0.22 
 -16   2   9    2.35    0.20 
  16   2  -9    2.09    0.22 
  15  -2  -9    4.05    0.25 
 -15  -2   9    4.68    0.24 
 -15   2   9    4.32    0.23 
  15   2  -9    4.96    0.27 
 -14  -2   9    6.46    0.26 
  14  -2  -9    6.45    0.29 
 -14   2   9    7.03    0.27 
  14   2  -9    6.66    0.28 
  13  -2  -9    7.89    0.30 
 -13  -2   9    7.69    0.27 
 -13   2   9    6.54    0.26 
  13   2  -9    6.23    0.27 
 -12  -2   9    1.16    0.12 
  12  -2  -9    1.42    0.12 
  12  -2  -9    1.34    0.16 
 -12   2   9    1.58    0.15 
  12   2  -9    1.47    0.16 
  11  -2  -9    7.27    0.27 
 -11  -2   9    7.77    0.25 
 -11  -2   9    8.14    0.25 
  11  -2  -9    7.59    0.22 
 -11   2   9    6.19    0.23 
  11   2  -9    5.79    0.23 
  10  -2  -9    4.50    0.21 
 -10  -2   9    4.33    0.18 
 -10  -2   9    4.64    0.19 
  10  -2  -9    4.40    0.16 
 -10   2   9    6.50    0.23 
  10   2  -9    5.90    0.22 
   9  -2  -9   10.67    0.25 
  -9  -2   9   11.19    0.29 
  -9  -2   9   10.77    0.28 
   9  -2  -9   11.14    0.31 
  -9   2   9   11.51    0.30 
   9   2  -9   12.07    0.31 
  -8  -2   9   16.66    0.35 
   8  -2  -9   16.14    0.32 
  -8  -2   9   16.09    0.36 
   8  -2  -9   16.47    0.38 
  -8   2   9   17.51    0.38 
   8   2  -9   18.22    0.39 
   7  -2  -9    3.45    0.13 
  -7  -2   9    3.43    0.15 
  -7  -2   9    3.64    0.15 
   7  -2  -9    3.50    0.17 
   7   2  -9    4.95    0.18 
  -7   2   9    4.94    0.18 
  -6  -2   9   22.25    0.42 
   6  -2  -9   21.84    0.39 
   6  -2  -9   22.36    0.45 
  -6  -2   9   22.39    0.44 
  -6   2   9   29.12    0.52 
   6   2  -9   28.90    0.52 
   5  -2  -9   13.22    0.31 
  -5  -2   9   13.53    0.31 
  -5  -2   9   13.52    0.29 
   5  -2  -9   13.56    0.27 
  -5   2   9   14.61    0.31 
   5   2  -9   14.03    0.30 
   4  -2  -9   24.84    0.47 
  -4  -2   9   25.28    0.46 
  -4  -2   9   24.62    0.45 
   4  -2  -9   24.81    0.42 
   4   2  -9   19.96    0.38 
  -4   2   9   20.51    0.39 
  -3  -2   9    7.04    0.19 
  -3  -2   9    6.74    0.19 
   3  -2  -9    6.56    0.20 
  -3  -2   9    7.19    0.13 
   3  -2  -9    6.86    0.13 
  -3   2   9    6.43    0.17 
   3   2  -9    6.55    0.17 
  -3   2   9    6.08    0.18 
  -2  -2   9   13.36    0.22 
   2  -2  -9   12.78    0.29 
  -2  -2   9   13.01    0.28 
   2  -2  -9   13.11    0.22 
  -2   2   9   14.60    0.30 
  -2   2   9   14.75    0.29 
   2   2  -9   15.30    0.29 
   1  -2  -9    5.34    0.17 
   1  -2  -9    5.47    0.12 
  -1  -2   9    5.34    0.16 
  -1  -2   9    5.42    0.12 
   1   2  -9    6.20    0.18 
  -1   2   9    6.59    0.17 
  -1   2   9    6.03    0.17 
   1   2  -9    6.14    0.15 
   0  -2   9    2.50    0.09 
   0  -2  -9    2.53    0.12 
   0  -2  -9    2.53    0.09 
   0   2  -9    1.14    0.07 
   0   2  -9    1.32    0.10 
   0   2   9    1.32    0.09 
   0   2   9    1.13    0.08 
  -1  -2  -9    7.02    0.16 
   1  -2   9    7.19    0.17 
  -1  -2  -9    7.26    0.20 
   1  -2   9    6.78    0.19 
   1   2   9    6.26    0.18 
  -1   2  -9    6.36    0.19 
  -1   2  -9    6.60    0.14 
   1   2   9    6.49    0.16 
   2  -2   9    9.91    0.24 
   2  -2   9    9.98    0.22 
  -2  -2  -9   10.10    0.21 
  -2  -2  -9    9.81    0.23 
   2   2   9    8.92    0.20 
  -2   2  -9    9.26    0.17 
  -2   2  -9    8.75    0.24 
   2   2   9    8.78    0.23 
   3  -2   9   15.33    0.30 
   3  -2   9   15.08    0.31 
  -3  -2  -9   15.21    0.31 
  -3  -2  -9   15.33    0.30 
  -3   2  -9   16.43    0.35 
   3   2   9   15.96    0.35 
   3   2   9   16.66    0.30 
  -4  -2  -9    1.11    0.09 
   4  -2   9    1.39    0.09 
   4  -2   9    1.36    0.10 
  -4  -2  -9    1.31    0.10 
   4   2   9    1.82    0.08 
  -4   2  -9    1.71    0.12 
   4   2   9    1.56    0.12 
   5  -2   9   21.97    0.43 
   5  -2   9   21.82    0.42 
  -5  -2  -9   22.01    0.41 
  -5  -2  -9   22.71    0.42 
  -5   2  -9   23.75    0.47 
   5   2   9   23.96    0.49 
  -6  -2  -9    8.31    0.23 
   6  -2   9    8.21    0.22 
  -6  -2  -9    8.35    0.22 
   6  -2   9    8.08    0.24 
  -6   2  -9    8.02    0.24 
   6   2   9    8.00    0.26 
   7  -2   9   25.52    0.51 
  -7  -2  -9   26.08    0.49 
   7  -2   9   26.19    0.49 
  -7  -2  -9   25.71    0.47 
  -7   2  -9   23.63    0.48 
   7   2   9   23.41    0.50 
  -8  -2  -9    9.76    0.27 
   8  -2   9    9.87    0.26 
   8  -2   9    9.21    0.28 
  -8  -2  -9    9.88    0.25 
   8   2   9    7.36    0.27 
  -8   2  -9    7.42    0.25 
  -9  -2  -9    3.79    0.18 
   9  -2   9    3.61    0.17 
   9  -2   9    3.89    0.20 
  -9  -2  -9    3.70    0.17 
  -9   2  -9    3.20    0.18 
   9   2   9    3.40    0.21 
 -10  -2  -9   11.55    0.33 
  10  -2   9   11.64    0.34 
 -10  -2  -9   12.08    0.30 
 -10   2  -9    9.10    0.30 
  10   2   9    9.27    0.32 
 -10   2  -9    9.13    0.26 
  11  -2   9    2.82    0.19 
 -11  -2  -9    2.60    0.19 
 -11   2  -9    2.75    0.17 
  11   2   9    2.85    0.21 
 -11   2  -9    2.68    0.19 
  12  -2   9    3.89    0.22 
 -12  -2  -9    3.65    0.22 
 -12   2  -9    4.78    0.21 
  12   2   9    4.46    0.26 
 -12   2  -9    4.57    0.24 
  13  -2   9    2.77    0.21 
 -13  -2  -9    2.68    0.21 
 -13   2  -9    3.68    0.23 
  13   2   9    3.63    0.24 
 -14  -2  -9    3.17    0.24 
  14  -2   9    3.40    0.23 
 -14   2  -9    2.56    0.22 
  14   2   9    2.94    0.25 
  15  -2   9    2.65    0.24 
 -15  -2  -9    3.06    0.24 
 -15   2  -9    3.62    0.25 
  15   2   9    3.51    0.28 
 -16   2  -9    0.79    0.16 
 -17  -3   9   -0.03    0.19 
 -17   3   9    0.05    0.11 
 -16  -3   9    1.57    0.18 
  16   3  -9    2.08    0.22 
 -16   3   9    1.67    0.18 
 -15  -3   9    5.69    0.27 
  15   3  -9    7.45    0.32 
 -15   3   9    7.30    0.31 
 -14  -3   9    0.97    0.14 
  14  -3  -9    1.13    0.15 
  14   3  -9    1.57    0.18 
 -14   3   9    1.50    0.18 
  13  -3  -9    4.68    0.21 
 -13  -3   9    4.65    0.24 
  13  -3  -9    5.15    0.26 
 -13   3   9    5.24    0.25 
  13   3  -9    5.34    0.26 
  12  -3  -9    6.11    0.22 
  12  -3  -9    5.77    0.26 
 -12  -3   9    5.62    0.25 
 -12   3   9    7.13    0.27 
  12   3  -9    7.35    0.29 
  11  -3  -9    3.77    0.21 
  11  -3  -9    3.46    0.17 
 -11  -3   9    3.69    0.20 
 -11   3   9    2.35    0.18 
  11   3  -9    2.00    0.17 
 -10  -3   9    0.81    0.11 
  10  -3  -9    0.77    0.10 
  10  -3  -9    0.83    0.12 
  10   3  -9    1.46    0.16 
 -10   3   9    1.58    0.15 
   9  -3  -9    6.20    0.24 
  -9  -3   9    6.15    0.20 
   9  -3  -9    6.13    0.20 
  -9  -3   9    6.60    0.23 
   9   3  -9    5.40    0.22 
  -9   3   9    5.42    0.21 
  -8  -3   9    9.20    0.25 
   8  -3  -9    8.98    0.24 
  -8  -3   9    9.11    0.26 
   8  -3  -9    9.14    0.28 
   8   3  -9    8.56    0.26 
  -8   3   9    8.29    0.25 
   7  -3  -9   12.51    0.33 
  -7  -3   9   12.38    0.31 
  -7  -3   9   12.64    0.30 
   7  -3  -9   12.92    0.29 
   7   3  -9   13.05    0.32 
  -7   3   9   12.92    0.32 
   6  -3  -9    7.90    0.25 
  -6  -3   9    7.59    0.22 
   6  -3  -9    7.65    0.21 
  -6  -3   9    7.51    0.23 
   6   3  -9   10.25    0.26 
  -6   3   9    9.78    0.26 
  -5  -3   9   15.14    0.32 
   5  -3  -9   14.76    0.31 
   5  -3  -9   14.40    0.35 
  -5  -3   9   14.99    0.33 
  -5   3   9   16.13    0.35 
   5   3  -9   16.04    0.34 
  -4  -3   9   13.44    0.30 
  -4  -3   9   13.32    0.31 
   4  -3  -9   13.38    0.29 
   4  -3  -9   13.11    0.32 
  -4   3   9   11.69    0.28 
   4   3  -9   11.62    0.27 
   3  -3  -9    6.55    0.21 
  -3  -3   9    7.27    0.21 
  -3  -3   9    7.18    0.16 
  -3  -3   9    7.18    0.21 
  -3   3   9    5.42    0.17 
  -3   3   9    5.50    0.17 
   3   3  -9    5.04    0.16 
  -2  -3   9    8.84    0.18 
  -2  -3   9    8.24    0.22 
  -2  -3   9    8.36    0.23 
   2  -3  -9    8.60    0.24 
   2   3  -9    8.37    0.20 
  -2   3   9    8.37    0.21 
  -2   3   9    8.35    0.22 
  -1  -3   9    5.25    0.17 
   1  -3  -9    5.57    0.19 
  -1  -3   9    5.48    0.14 
   1   3  -9    7.09    0.21 
  -1   3   9    6.73    0.18 
   1   3  -9    7.04    0.17 
  -1   3   9    6.95    0.20 
   0  -3  -9    4.11    0.11 
   0  -3   9    4.08    0.13 
   0  -3  -9    4.22    0.16 
   0  -3   9    3.90    0.15 
   0   3   9    4.14    0.16 
   0   3  -9    3.90    0.16 
   0   3  -9    4.01    0.12 
   0   3   9    4.05    0.13 
   1  -3   9    6.96    0.21 
  -1  -3  -9    7.10    0.16 
  -1  -3  -9    7.11    0.21 
   1  -3   9    6.95    0.18 
  -1   3  -9    7.68    0.23 
   1   3   9    8.00    0.19 
   1   3   9    7.62    0.22 
  -1   3  -9    7.79    0.17 
   2  -3   9    6.36    0.18 
   2  -3   9    6.30    0.20 
  -2  -3  -9    6.43    0.16 
  -2  -3  -9    6.74    0.21 
  -2   3  -9    6.63    0.22 
   2   3   9    7.09    0.17 
   2   3   9    6.64    0.21 
   3  -3   9    9.12    0.24 
   3  -3   9    8.68    0.22 
  -3  -3  -9    8.75    0.25 
  -3  -3  -9    8.88    0.21 
   3   3   9    7.74    0.24 
  -3   3  -9    7.55    0.24 
  -4  -3  -9   28.50    0.49 
  -4  -3  -9   28.42    0.53 
   4  -3   9   28.21    0.51 
   4  -3   9   28.31    0.52 
  -4   3  -9   23.85    0.48 
   4   3   9   24.07    0.50 
   5  -3   9    0.70    0.09 
  -5  -3  -9    0.51    0.08 
  -5  -3  -9    0.64    0.08 
   5  -3   9    0.56    0.08 
   5   3   9    0.12    0.07 
  -5   3  -9    0.09    0.07 
   6  -3   9    6.38    0.22 
  -6  -3  -9    6.54    0.22 
  -6  -3  -9    6.51    0.20 
   6  -3   9    6.49    0.22 
  -6   3  -9    5.48    0.21 
   6   3   9    5.15    0.22 
  -7  -3  -9   13.24    0.32 
   7  -3   9   13.41    0.34 
  -7  -3  -9   13.03    0.32 
   7  -3   9   12.84    0.33 
  -7   3  -9   13.79    0.35 
   7   3   9   13.54    0.38 
   8  -3   9    3.09    0.18 
  -8  -3  -9    3.10    0.17 
  -8  -3  -9    3.03    0.17 
   8  -3   9    3.15    0.17 
   8   3   9    4.67    0.23 
  -8   3  -9    4.41    0.21 
  -9  -3  -9    3.71    0.19 
   9  -3   9    3.61    0.20 
  -9  -3  -9    3.40    0.18 
  -9   3  -9    2.80    0.18 
  -9   3  -9    2.46    0.16 
   9   3   9    2.77    0.20 
 -10  -3  -9    9.01    0.29 
 -10  -3  -9    9.24    0.29 
  10  -3   9    9.19    0.32 
 -10   3  -9   10.68    0.32 
  10   3   9   11.47    0.38 
 -10   3  -9   11.22    0.33 
 -11  -3  -9    2.52    0.19 
 -11  -3  -9    2.49    0.18 
  11  -3   9    2.25    0.20 
  11   3   9    2.98    0.22 
 -11   3  -9    3.23    0.21 
 -11   3  -9    3.18    0.20 
  12  -3   9    1.45    0.16 
 -12  -3  -9    1.31    0.15 
 -12  -3  -9    1.28    0.15 
 -12   3  -9    2.76    0.21 
 -12   3  -9    3.22    0.21 
  12   3   9    3.59    0.25 
 -13  -3  -9    0.59    0.13 
  13  -3   9    0.64    0.14 
 -13   3  -9    0.80    0.14 
  13   3   9    0.85    0.16 
 -13   3  -9    0.78    0.14 
 -14  -3  -9    8.36    0.34 
  14  -3   9    8.41    0.35 
 -14   3  -9    7.05    0.31 
  14   3   9    6.24    0.32 
 -14   3  -9    6.53    0.28 
  15   3   9    1.48    0.20 
 -15   3  -9    1.74    0.19 
  15  -4  -9    2.23    0.25 
 -15  -4   9    2.47    0.24 
  15   4  -9    2.64    0.25 
 -15   4   9    2.57    0.25 
 -14  -4   9    2.84    0.23 
  14  -4  -9    2.24    0.20 
  14   4  -9    2.14    0.22 
 -14   4   9    2.13    0.21 
  13  -4  -9    2.28    0.18 
 -13  -4   9    2.27    0.21 
  13   4  -9    2.74    0.23 
 -13   4   9    2.17    0.21 
  12  -4  -9    5.42    0.23 
 -12  -4   9    5.50    0.25 
  12  -4  -9    5.72    0.26 
  12   4  -9    6.60    0.29 
 -12   4   9    6.25    0.27 
  11  -4  -9    0.73    0.11 
 -11  -4   9    0.54    0.12 
  11  -4  -9    0.64    0.12 
 -11   4   9    0.25    0.10 
  11   4  -9    0.08    0.10 
  10  -4  -9    1.84    0.17 
  10  -4  -9    2.03    0.16 
 -10  -4   9    2.32    0.18 
 -10   4   9    2.70    0.19 
  10   4  -9    2.89    0.20 
  -9  -4   9    5.66    0.24 
   9  -4  -9    5.54    0.22 
   9  -4  -9    5.78    0.24 
   9   4  -9    5.68    0.24 
  -9   4   9    5.87    0.24 
  -8  -4   9    0.19    0.08 
   8  -4  -9    0.23    0.08 
   8  -4  -9    0.33    0.09 
  -8   4   9    0.68    0.11 
   8   4  -9    0.87    0.12 
   7  -4  -9    5.15    0.22 
   7  -4  -9    5.46    0.21 
  -7  -4   9    5.72    0.19 
  -7  -4   9    5.72    0.22 
   7   4  -9    7.16    0.25 
  -7   4   9    7.60    0.25 
  -6  -4   9    8.78    0.27 
   6  -4  -9    8.88    0.26 
   6  -4  -9    9.11    0.28 
  -6  -4   9    9.13    0.25 
  -6   4   9    7.93    0.25 
   6   4  -9    8.08    0.25 
  -5  -4   9    6.54    0.20 
  -5  -4   9    6.61    0.23 
   5  -4  -9    6.65    0.24 
   5  -4  -9    6.49    0.22 
   5   4  -9    4.68    0.19 
  -5   4   9    4.53    0.18 
  -4  -4   9    6.65    0.21 
   4  -4  -9    6.36    0.22 
  -4  -4   9    6.39    0.22 
   4  -4  -9    6.83    0.23 
  -4   4   9    6.68    0.21 
   4   4  -9    6.31    0.21 
  -3  -4   9   19.07    0.39 
  -3  -4   9   19.65    0.42 
   3  -4  -9   18.99    0.42 
  -3   4   9   21.16    0.43 
   3   4  -9   20.87    0.41 
  -3   4   9   20.45    0.41 
  -2  -4   9    7.29    0.22 
  -2  -4   9    6.80    0.18 
   2  -4  -9    6.97    0.23 
  -2  -4   9    7.22    0.23 
  -2   4   9    9.88    0.25 
   2   4  -9    9.86    0.24 
  -2   4   9    9.78    0.27 
   1  -4  -9    7.34    0.24 
  -1  -4   9    7.58    0.20 
  -1  -4   9    7.77    0.23 
   1   4  -9    8.30    0.25 
   1   4  -9    8.40    0.21 
  -1   4   9    8.84    0.23 
  -1   4   9    8.46    0.25 
   0  -4   9   14.81    0.31 
   0  -4  -9   14.60    0.35 
   0  -4   9   14.76    0.34 
   0   4   9   13.85    0.29 
   0   4  -9   13.50    0.34 
   0   4   9   13.63    0.34 
   1  -4   9    1.65    0.11 
  -1  -4  -9    1.61    0.14 
   1   4   9    1.86    0.14 
  -1   4  -9    1.87    0.15 
  -2  -4  -9    6.78    0.24 
   2  -4   9    6.18    0.22 
   2  -4   9    6.74    0.21 
   2   4   9    4.82    0.21 
  -2   4  -9    5.37    0.21 
   3  -4   9    2.22    0.14 
  -3  -4  -9    1.77    0.15 
   3  -4   9    1.77    0.13 
  -3   4  -9    2.29    0.16 
   3   4   9    2.25    0.16 
   4  -4   9    5.70    0.20 
  -4  -4  -9    5.62    0.18 
   4  -4   9    5.43    0.21 
  -4  -4  -9    5.51    0.22 
  -4   4  -9    6.83    0.25 
   4   4   9    6.76    0.25 
   5  -4   9    8.87    0.27 
   5  -4   9    9.13    0.27 
  -5  -4  -9    9.23    0.24 
  -5  -4  -9    8.92    0.28 
   5   4   9   10.51    0.33 
  -5   4  -9    9.98    0.30 
   6  -4   9    0.66    0.10 
  -6  -4  -9    0.62    0.09 
   6  -4   9    0.51    0.10 
  -6  -4  -9    0.76    0.11 
  -6   4  -9    0.09    0.08 
   6   4   9    0.25    0.10 
  -7  -4  -9    5.30    0.23 
   7  -4   9    5.02    0.22 
  -7  -4  -9    5.06    0.20 
   7  -4   9    5.20    0.22 
   7   4   9    5.29    0.26 
  -7   4  -9    5.21    0.23 
  -8  -4  -9    2.65    0.17 
   8  -4   9    2.55    0.18 
  -8  -4  -9    2.26    0.18 
  -8   4  -9    2.06    0.17 
  -8   4  -9    2.25    0.18 
   8   4   9    1.98    0.19 
  -9  -4  -9    1.05    0.14 
   9  -4   9    1.17    0.15 
  -9  -4  -9    1.65    0.16 
  -9   4  -9    1.79    0.18 
   9   4   9    1.85    0.20 
  -9   4  -9    1.98    0.18 
  10  -4   9    1.18    0.15 
 -10  -4  -9    1.03    0.14 
 -10  -4  -9    0.91    0.13 
  10   4   9    1.11    0.16 
 -10   4  -9    0.95    0.14 
 -10   4  -9    0.93    0.13 
 -11  -4  -9    7.80    0.31 
  11  -4   9    7.93    0.32 
 -11  -4  -9    7.28    0.29 
 -11   4  -9    7.30    0.30 
 -11   4  -9    7.28    0.29 
  11   4   9    7.12    0.32 
 -12  -4  -9    2.77    0.23 
  12  -4   9    3.39    0.24 
 -12  -4  -9    2.98    0.23 
  12   4   9    2.99    0.25 
 -12   4  -9    2.98    0.23 
  13  -4   9    1.97    0.22 
 -13  -4  -9    1.57    0.18 
 -13  -4  -9    1.67    0.18 
 -13   4  -9    1.85    0.21 
  13   4   9    1.93    0.23 
 -14  -4  -9    0.40    0.17 
  14   4   9    0.30    0.13 
 -14   4  -9    0.33    0.13 
  14  -5  -9    0.72    0.14 
  13  -5  -9    4.94    0.26 
 -13  -5   9    4.97    0.28 
  13   5  -9    4.68    0.29 
 -13   5   9    4.80    0.27 
 -12  -5   9    1.19    0.16 
  12  -5  -9    0.91    0.14 
  12   5  -9    1.38    0.18 
 -12   5   9    1.20    0.17 
  11  -5  -9    4.93    0.25 
 -11  -5   9    4.50    0.25 
  11  -5  -9    5.19    0.39 
  11   5  -9    4.11    0.26 
 -11   5   9    4.45    0.25 
 -10  -5   9    1.27    0.16 
  10  -5  -9    0.86    0.13 
  10  -5  -9    0.80    0.13 
 -10   5   9    1.47    0.16 
  10   5  -9    1.25    0.16 
   9  -5  -9    2.62    0.19 
   9  -5  -9    2.17    0.18 
  -9  -5   9    2.86    0.21 
  -9   5   9    3.44    0.22 
   9   5  -9    3.74    0.23 
   8  -5  -9    2.76    0.19 
  -8  -5   9    2.68    0.20 
   8  -5  -9    2.84    0.19 
   8   5  -9    2.13    0.19 
  -8   5   9    2.25    0.18 
   7  -5  -9    0.25    0.10 
  -7  -5   9    0.18    0.09 
   7  -5  -9    0.20    0.10 
  -7   5   9    0.06    0.08 
   7   5  -9   -0.01    0.08 
   6  -5  -9    9.60    0.30 
  -6  -5   9    9.79    0.31 
   6  -5  -9    9.90    0.31 
  -6   5   9   11.49    0.33 
   6   5  -9   11.53    0.33 
  -5  -5   9    6.53    0.25 
   5  -5  -9    6.82    0.25 
  -5  -5   9    6.62    0.22 
   5  -5  -9    6.52    0.25 
  -5   5   9    6.62    0.24 
   5   5  -9    6.95    0.24 
   4  -5  -9    6.53    0.25 
  -4  -5   9    7.03    0.23 
   4  -5  -9    6.92    0.26 
  -4  -5   9    7.06    0.26 
  -4   5   9    6.88    0.24 
   4   5  -9    7.56    0.24 
  -3  -5   9    4.53    0.19 
   3  -5  -9    4.14    0.21 
  -3  -5   9    4.41    0.21 
   3   5  -9    5.37    0.20 
  -3   5   9    5.02    0.22 
  -3   5   9    5.12    0.20 
  -2  -5   9   11.14    0.30 
   2  -5  -9   11.23    0.33 
  -2   5   9   10.71    0.28 
  -2   5   9   10.18    0.31 
   2   5  -9    9.87    0.30 
  -1  -5   9    6.00    0.22 
   1  -5  -9    5.87    0.24 
   1   5  -9    5.43    0.23 
  -1   5   9    5.43    0.23 
   0  -5  -9    0.93    0.12 
   0  -5   9    1.08    0.12 
   0  -5   9    1.04    0.12 
   0   5  -9    0.26    0.09 
   0   5   9    0.29    0.09 
  -1  -5  -9   12.73    0.35 
   1  -5   9   12.18    0.33 
   1  -5   9   12.65    0.32 
  -1   5  -9   14.14    0.37 
   1   5   9   13.90    0.38 
  -2  -5  -9    2.60    0.19 
   2  -5   9    2.71    0.16 
   2  -5   9    2.82    0.17 
   2   5   9    2.10    0.17 
  -2   5  -9    2.35    0.18 
   3  -5   9    3.51    0.19 
   3  -5   9    3.63    0.19 
  -3  -5  -9    3.69    0.21 
   3   5   9    3.22    0.21 
  -3   5  -9    3.06    0.20 
   4  -5   9    1.52    0.15 
   4  -5   9    1.47    0.16 
  -4  -5  -9    1.46    0.17 
   4   5   9    1.02    0.14 
  -4   5  -9    0.89    0.13 
   5  -5   9    0.19    0.09 
  -5  -5  -9    0.33    0.11 
   5  -5   9    0.28    0.09 
   5   5   9    0.12    0.10 
  -5   5  -9    0.15    0.09 
   6  -5   9    3.68    0.21 
  -6  -5  -9    3.69    0.22 
  -6   5  -9    2.81    0.20 
  -6   5  -9    2.82    0.20 
   6   5   9    3.11    0.23 
  -7  -5  -9    0.62    0.13 
   7  -5   9    0.58    0.12 
  -7   5  -9    0.90    0.14 
   7   5   9    0.94    0.15 
   8  -5   9    1.95    0.19 
  -8  -5  -9    1.92    0.21 
  -8   5  -9    1.63    0.17 
   8   5   9    1.60    0.19 
  -9  -5  -9    3.83    0.25 
   9  -5   9    3.72    0.23 
   9   5   9    4.26    0.27 
  -9   5  -9    4.20    0.24 
  10  -5   9    1.87    0.20 
 -10  -5  -9    1.92    0.22 
 -10  -5  -9    2.23    0.19 
  10   5   9    2.07    0.24 
 -10   5  -9    2.45    0.22 
 -11  -5  -9    0.44    0.14 
 -11  -5  -9    0.40    0.12 
  11  -5   9    0.20    0.12 
  11   5   9    0.08    0.11 
 -11   5  -9    0.14    0.13 
 -12  -5  -9    3.87    0.28 
 -12  -5  -9    4.03    0.26 
  11  -6  -9    0.14    0.14 
 -11  -6   9    0.02    0.18 
  10  -6  -9    2.43    0.23 
 -10  -6   9    2.23    0.22 
 -10   6   9    1.21    0.17 
  10   6  -9    1.90    0.20 
   9  -6  -9    1.64    0.18 
  -9  -6   9    1.58    0.18 
   9   6  -9    1.86    0.22 
  -9   6   9    1.44    0.17 
   8  -6  -9    0.04    0.10 
  -8  -6   9   -0.02    0.09 
   8  -6  -9    0.06    0.10 
   8   6  -9   -0.05    0.10 
  -8   6   9    0.11    0.10 
   7  -6  -9    2.09    0.19 
   7  -6  -9    2.02    0.20 
  -7  -6   9    2.12    0.20 
  -7   6   9    2.68    0.20 
   7   6  -9    2.33    0.20 
   6  -6  -9    1.56    0.18 
  -6  -6   9    1.38    0.16 
   6  -6  -9    1.22    0.15 
   6   6  -9    1.52    0.18 
  -6   6   9    1.32    0.15 
   5  -6  -9    6.06    0.27 
   5  -6  -9    6.55    0.27 
  -5  -6   9    5.87    0.27 
   5   6  -9    6.03    0.25 
  -5   6   9    5.72    0.25 
  -4  -6   9    1.38    0.15 
   4  -6  -9    1.69    0.18 
  -4   6   9    1.40    0.16 
  -4   6   9    1.19    0.15 
  -3  -6   9    5.39    0.23 
   3  -6  -9    5.76    0.26 
   3   6  -9    6.40    0.27 
  -3   6   9    6.50    0.27 
   2  -6  -9    1.81    0.19 
  -2  -6   9    2.07    0.17 
   2   6  -9    2.28    0.19 
  -2   6   9    1.96    0.18 
   1  -6  -9    6.34    0.28 
  -1  -6   9    6.62    0.26 
   1   6  -9    5.86    0.26 
  -1   6   9    6.33    0.28 
   0  -6  -9    3.88    0.24 
   0  -6   9    3.97    0.21 
   0   6   9    3.35    0.23 
   0   6  -9    3.51    0.22 
   1  -6   9    1.54    0.17 
  -1  -6  -9    1.24    0.16 
   1   6   9    1.35    0.16 
  -1   6  -9    1.62    0.19 
   2  -6   9    3.51    0.21 
  -2  -6  -9    3.42    0.23 
   2  -6   9    3.67    0.21 
   2   6   9    4.29    0.25 
   3  -6   9    0.77    0.13 
  -3  -6  -9    0.73    0.14 
   3  -6   9    0.57    0.12 
  -3   6  -9    0.86    0.13 
   3   6   9    1.04    0.16 
  -4  -6  -9    1.35    0.17 
   4  -6   9    1.16    0.15 
  -4   6  -9    1.55    0.17 
   4   6   9    1.40    0.18 
   5  -6   9    0.38    0.12 
  -5  -6  -9    0.54    0.14 
  -5   6  -9    0.42    0.12 
   5   6   9    0.67    0.14 
   6  -6   9    0.25    0.12 
  -6  -6  -9    0.12    0.12 
  -6   6  -9    0.23    0.12 
   6   6   9    0.35    0.13 
  -7  -6  -9    1.18    0.17 
   7  -6   9    1.30    0.17 
  -7   6  -9    1.56    0.18 
   7   6   9    1.93    0.21 
   8  -6   9    0.22    0.13 
  -8  -6  -9    0.25    0.13 
   8   6   9    0.55    0.15 
  -8   6  -9    0.40    0.14 
   9  -6   9    2.71    0.25 
  -7  -7   9    0.61    0.14 
   7   7  -9    0.26    0.15 
  -7   7   9    0.50    0.13 
  -6  -7   9    1.31    0.17 
   6  -7  -9    1.16    0.16 
  -6   7   9    1.09    0.16 
  -5  -7   9    1.15    0.16 
   5  -7  -9    0.75    0.15 
   4  -7  -9    1.56    0.18 
  -4   7   9    1.80    0.22 
   3  -7  -9    0.19    0.12 
  -3   7   9    0.44    0.13 
   2  -7  -9    1.75    0.19 
  -2   7   9    1.67    0.19 
   1  -7  -9    3.14    0.25 
  -1   7   9    2.13    0.23 
   0  -7  -9    3.51    0.26 
   0   7   9    3.01    0.24 
   0   7  -9    2.67    0.21 
  -1  -7  -9    6.82    0.33 
   1   7   9    7.78    0.34 
  -1   7  -9    7.14    0.30 
  -2  -7  -9    0.38    0.14 
   2   7   9    0.51    0.16 
  -2   7  -9    0.70    0.14 
  -3   7  -9    1.81    0.19 
   4  -7   9   -0.10    0.14 
   5  -7   9    0.01    0.11 
  19   0 -10    7.17    0.36 
  18   0 -10    0.11    0.13 
  17   0 -10    6.86    0.32 
  16   0 -10    4.27    0.26 
 -15   0  10   12.57    0.35 
 -15   0  10   12.90    0.36 
  15   0 -10   12.87    0.40 
  14   0 -10    1.13    0.14 
 -14   0  10    1.21    0.14 
 -14   0  10    1.14    0.13 
 -13   0  10    7.84    0.27 
  13   0 -10    7.58    0.28 
 -13   0  10    8.20    0.24 
 -12   0  10    0.62    0.09 
 -12   0  10    0.61    0.10 
  12   0 -10    0.80    0.11 
 -11   0  10    0.21    0.06 
  11   0 -10    0.33    0.09 
 -11   0  10    0.28    0.07 
  10   0 -10    0.04    0.06 
 -10   0  10    0.16    0.06 
 -10   0  10    0.13    0.06 
  -9   0  10    1.14    0.11 
  -9   0  10    0.95    0.09 
   9   0 -10    1.05    0.12 
   8   0 -10    3.40    0.16 
  -8   0  10    3.21    0.15 
  -8   0  10    2.92    0.12 
  -7   0  10    0.10    0.04 
   7   0 -10    0.13    0.06 
  -7   0  10    0.17    0.05 
  -6   0  10    0.81    0.07 
   6   0 -10    0.62    0.08 
  -6   0  10    0.84    0.09 
  -5   0  10   16.55    0.30 
  -5   0  10   16.80    0.35 
  -5   0  10   16.65    0.25 
   5   0 -10   15.92    0.34 
  -4   0  10   16.12    0.30 
  -4   0  10   15.76    0.33 
  -4   0  10   16.49    0.25 
   4   0 -10   15.98    0.33 
  -3   0  10   26.51    0.48 
   3   0 -10   27.44    0.45 
   3   0 -10   26.66    0.47 
  -3   0  10   27.72    0.41 
  -2   0  10   44.77    0.66 
  -2   0  10   45.27    0.73 
   2   0 -10   43.99    0.69 
   2   0 -10   44.57    0.70 
   1   0 -10   56.73    0.86 
  -1   0  10   57.57    0.84 
   1   0 -10   57.64    0.86 
  -1   0  10   57.71    0.89 
   0   0 -10    7.42    0.19 
   0   0 -10    7.75    0.18 
   0   0  10    7.63    0.20 
   0   0  10    7.67    0.18 
  -1   0 -10  106.45    1.54 
   1   0  10  107.10    1.53 
   1   0  10  105.82    1.52 
  -1   0 -10  108.24    1.50 
   2   0  10    8.87    0.21 
  -2   0 -10    8.65    0.18 
  -2   0 -10    8.57    0.22 
   2   0  10    8.61    0.21 
  -3   0 -10    1.90    0.11 
   3   0  10    1.92    0.11 
   3   0  10    1.92    0.09 
  -3   0 -10    1.89    0.08 
   4   0  10    0.98    0.10 
  -4   0 -10    1.06    0.10 
   4   0  10    1.12    0.08 
  -4   0 -10    1.01    0.06 
  -5   0 -10    0.21    0.06 
   5   0  10    0.14    0.04 
   5   0  10    0.10    0.05 
  -5   0 -10    0.12    0.04 
  -6   0 -10    4.97    0.18 
   6   0  10    4.75    0.14 
   7   0  10    0.68    0.08 
  -7   0 -10    0.65    0.09 
   7   0  10    0.64    0.10 
  -8   0 -10    1.89    0.15 
   8   0  10    1.88    0.15 
   8   0  10    1.71    0.10 
  -9   0 -10   -0.04    0.07 
   9   0  10    0.11    0.08 
 -10   0 -10   16.90    0.41 
  10   0  10   16.66    0.44 
 -11   0 -10    4.59    0.22 
  11   0  10    4.21    0.23 
  12   0  10    8.85    0.33 
 -12   0 -10    8.79    0.32 
 -13   0 -10    3.33    0.23 
  13   0  10    2.91    0.22 
 -14   0 -10    4.91    0.27 
  14   0  10    4.74    0.27 
  15   0  10    0.18    0.12 
 -15   0 -10    0.14    0.12 
 -16   0 -10    1.80    0.21 
  16   0  10    2.40    0.28 
  18  -1 -10    3.36    0.26 
 -18  -1  10    2.67    0.23 
  18   1 -10    2.12    0.24 
  17  -1 -10    1.39    0.18 
 -17  -1  10    1.63    0.19 
 -17   1  10    1.58    0.17 
  17   1 -10    1.59    0.19 
 -16  -1  10    8.45    0.30 
  16  -1 -10    8.67    0.35 
 -16   1  10    8.35    0.31 
  16   1 -10    8.85    0.35 
  15  -1 -10    1.81    0.19 
 -15  -1  10    1.86    0.17 
 -15   1  10    2.00    0.18 
  15   1 -10    2.13    0.20 
 -14  -1  10    8.18    0.27 
  14  -1 -10    8.36    0.31 
  14   1 -10    7.86    0.30 
 -14   1  10    8.49    0.29 
 -13  -1  10    6.75    0.25 
  13  -1 -10    6.25    0.27 
 -13  -1  10    6.38    0.24 
  13   1 -10    5.57    0.25 
 -13   1  10    5.86    0.24 
 -12  -1  10    1.59    0.14 
  12  -1 -10    1.95    0.17 
 -12  -1  10    1.71    0.14 
 -12   1  10    1.26    0.13 
  12   1 -10    1.29    0.15 
 -11  -1  10    2.23    0.15 
 -11  -1  10    1.99    0.14 
  11  -1 -10    2.02    0.17 
 -11   1  10    2.42    0.16 
 -10  -1  10    3.93    0.18 
 -10  -1  10    4.42    0.17 
  10  -1 -10    4.54    0.20 
 -10   1  10    3.55    0.17 
 -10   1  10    3.43    0.13 
   9  -1 -10    1.47    0.14 
  -9  -1  10    1.70    0.11 
  -9  -1  10    1.72    0.12 
   9  -1 -10    1.63    0.09 
  -9   1  10    1.93    0.13 
  -9   1  10    1.78    0.10 
   9   1 -10    1.64    0.13 
   8  -1 -10    5.28    0.20 
  -8  -1  10    4.91    0.18 
  -8  -1  10    4.83    0.16 
   8  -1 -10    5.13    0.14 
   8   1 -10    5.87    0.20 
  -8   1  10    6.15    0.15 
  -8   1  10    5.88    0.20 
   7  -1 -10    6.01    0.21 
  -7  -1  10    5.94    0.18 
  -7  -1  10    5.78    0.20 
   7  -1 -10    5.97    0.14 
  -7   1  10    6.45    0.20 
  -7   1  10    6.10    0.15 
   6  -1 -10    1.25    0.07 
  -6  -1  10    1.27    0.09 
  -6  -1  10    1.37    0.11 
   6  -1 -10    1.11    0.10 
   6   1 -10    1.95    0.12 
  -6   1  10    2.13    0.09 
  -6   1  10    2.25    0.12 
   5  -1 -10   28.51    0.52 
  -5  -1  10   28.64    0.52 
   5  -1 -10   28.04    0.44 
  -5  -1  10   28.32    0.49 
  -5   1  10   29.12    0.52 
   5   1 -10   28.98    0.51 
  -5   1  10   29.01    0.45 
   4  -1 -10    2.77    0.13 
  -4  -1  10    2.84    0.12 
   4  -1 -10    2.92    0.09 
  -4  -1  10    2.81    0.13 
  -4   1  10    5.35    0.13 
   4   1 -10    5.56    0.17 
  -4   1  10    5.18    0.17 
   3  -1 -10   40.29    0.60 
   3  -1 -10   39.82    0.66 
  -3  -1  10   39.72    0.64 
  -3  -1  10   39.46    0.67 
  -3   1  10   42.25    0.64 
   3   1 -10   42.34    0.67 
  -3   1  10   42.67    0.69 
  -2  -1  10   67.58    0.93 
   2  -1 -10   68.14    0.98 
  -2  -1  10   66.80    1.03 
   2  -1 -10   67.13    1.02 
  -2   1  10   64.69    0.93 
  -2   1  10   62.99    0.97 
   2   1 -10   64.45    0.96 
   2   1 -10   63.42    0.95 
   1  -1 -10    5.78    0.17 
   1  -1 -10    6.08    0.15 
  -1  -1  10    6.11    0.13 
  -1  -1  10    5.74    0.18 
   1   1 -10    4.50    0.13 
  -1   1  10    4.46    0.13 
   1   1 -10    4.58    0.15 
  -1   1  10    4.29    0.14 
   0  -1 -10   54.10    0.81 
   0  -1  10   53.14    0.84 
   0  -1  10   54.20    0.80 
   0  -1 -10   55.32    0.83 
   0   1  10   42.63    0.67 
   0   1  10   43.29    0.69 
   0   1 -10   42.72    0.65 
   0   1 -10   43.06    0.69 
   1  -1  10    7.44    0.20 
  -1  -1 -10    7.64    0.19 
  -1  -1 -10    7.40    0.18 
   1  -1  10    7.77    0.18 
  -1   1 -10    6.89    0.15 
   1   1  10    6.94    0.19 
   1   1  10    6.60    0.18 
  -2  -1 -10    8.72    0.20 
  -2  -1 -10    8.79    0.21 
   2  -1  10    8.57    0.21 
   2  -1  10    8.90    0.22 
   2   1  10    9.49    0.24 
  -2   1 -10    9.64    0.24 
  -2   1 -10    9.89    0.18 
   2   1  10    9.81    0.22 
  -3  -1 -10    0.31    0.06 
  -3  -1 -10    0.23    0.05 
   3  -1  10    0.32    0.06 
   3  -1  10    0.34    0.05 
   3   1  10    0.36    0.06 
   3   1  10    0.74    0.07 
  -3   1 -10    0.64    0.08 
  -3   1 -10    0.68    0.05 
  -4  -1 -10   19.11    0.37 
   4  -1  10   19.43    0.36 
   4  -1  10   18.89    0.39 
  -4  -1 -10   19.05    0.35 
   4   1  10   19.34    0.34 
   4   1  10   18.86    0.40 
  -4   1 -10   18.95    0.39 
   5  -1  10    6.01    0.20 
  -5  -1 -10    5.75    0.16 
   5  -1  10    5.40    0.16 
  -5  -1 -10    5.51    0.18 
  -5   1 -10    4.97    0.19 
   5   1  10    4.51    0.13 
   5   1  10    4.93    0.19 
  -6  -1 -10    6.72    0.18 
  -6  -1 -10    7.07    0.22 
   6  -1  10    6.95    0.22 
   6  -1  10    6.84    0.19 
  -6   1 -10    5.87    0.21 
   6   1  10    5.79    0.15 
  -7  -1 -10    4.86    0.19 
   7  -1  10    4.56    0.20 
  -7  -1 -10    4.59    0.15 
   7  -1  10    4.34    0.16 
  -7   1 -10    4.81    0.20 
   7   1  10    4.43    0.20 
  -8  -1 -10    2.18    0.11 
   8  -1  10    2.25    0.16 
   8  -1  10    2.39    0.13 
  -8  -1 -10    2.59    0.15 
   8   1  10    3.22    0.19 
  -8   1 -10    3.03    0.18 
  -9  -1 -10   11.25    0.31 
   9  -1  10   10.80    0.26 
   9  -1  10   10.45    0.32 
  -9   1 -10   11.52    0.32 
   9   1  10   10.99    0.34 
  10  -1  10    0.63    0.11 
 -10  -1 -10    0.56    0.10 
 -10   1 -10    0.85    0.10 
  10   1  10    0.76    0.12 
 -10   1 -10    1.02    0.13 
  11  -1  10    8.48    0.31 
 -11  -1 -10    8.57    0.29 
  11   1  10    9.29    0.33 
 -11   1 -10    8.76    0.31 
 -12  -1 -10    1.64    0.17 
  12  -1  10    1.64    0.19 
  12   1  10    0.76    0.14 
 -12   1 -10    0.77    0.13 
 -13  -1 -10    2.31    0.21 
  13  -1  10    2.49    0.21 
  13   1  10    3.41    0.24 
 -13   1 -10    2.93    0.22 
  14  -1  10    7.32    0.31 
 -14  -1 -10    6.70    0.30 
  14   1  10    6.07    0.31 
 -14   1 -10    6.14    0.29 
 -15  -1 -10    1.58    0.19 
  15  -1  10    1.75    0.20 
 -15   1 -10    2.12    0.23 
  15   1  10    1.98    0.22 
 -16   1 -10    5.54    0.31 
 -18  -2  10    1.14    0.17 
 -18   2  10    1.54    0.19 
  17  -2 -10    6.51    0.42 
 -17  -2  10    6.94    0.31 
  17   2 -10    8.19    0.36 
 -17   2  10    7.25    0.31 
  16  -2 -10    2.79    0.24 
 -16  -2  10    3.04    0.22 
 -16   2  10    2.97    0.22 
  16   2 -10    2.71    0.24 
 -15  -2  10    9.38    0.33 
  15  -2 -10    9.63    0.36 
 -15   2  10    8.61    0.32 
  15   2 -10    9.49    0.35 
 -14  -2  10    1.62    0.18 
  14  -2 -10    1.46    0.17 
 -14   2  10    1.86    0.18 
  14   2 -10    1.26    0.16 
  13  -2 -10    9.61    0.33 
 -13  -2  10    9.40    0.30 
  13   2 -10    8.83    0.31 
 -13   2  10    8.64    0.30 
  12  -2 -10    0.14    0.09 
 -12  -2  10    0.30    0.11 
 -12  -2  10    0.19    0.09 
  12   2 -10    0.71    0.12 
 -12   2  10    0.84    0.12 
 -11  -2  10    1.75    0.15 
 -11  -2  10    1.63    0.13 
  11  -2 -10    1.84    0.17 
  11  -2 -10    1.71    0.12 
 -11   2  10    1.95    0.16 
  11   2 -10    1.93    0.16 
  10  -2 -10    4.41    0.21 
 -10  -2  10    3.94    0.18 
  10  -2 -10    4.21    0.16 
 -10  -2  10    4.55    0.19 
  10   2 -10    3.57    0.19 
 -10   2  10    3.71    0.18 
  -9  -2  10   15.06    0.34 
   9  -2 -10   14.67    0.30 
   9  -2 -10   14.76    0.38 
  -9  -2  10   14.53    0.35 
  -9   2  10   15.65    0.37 
   9   2 -10   15.71    0.37 
   8  -2 -10    1.30    0.09 
  -8  -2  10    1.36    0.12 
  -8  -2  10    1.28    0.11 
   8  -2 -10    1.44    0.14 
  -8   2  10    1.83    0.13 
   8   2 -10    1.76    0.14 
   7  -2 -10    6.26    0.17 
  -7  -2  10    6.22    0.20 
   7  -2 -10    6.11    0.22 
  -7  -2  10    6.32    0.21 
  -7   2  10    5.82    0.20 
   7   2 -10    5.45    0.20 
   6  -2 -10   14.55    0.28 
  -6  -2  10   14.50    0.33 
   6  -2 -10   13.76    0.34 
  -6  -2  10   14.41    0.31 
  -6   2  10   16.94    0.36 
   6   2 -10   16.84    0.36 
  -5  -2  10   10.38    0.26 
  -5  -2  10   10.51    0.27 
   5  -2 -10   10.72    0.28 
   5  -2 -10   10.77    0.23 
   5   2 -10   11.88    0.27 
  -5   2  10   11.35    0.27 
  -4  -2  10   18.25    0.36 
  -4  -2  10   17.88    0.38 
   4  -2 -10   18.36    0.29 
   4  -2 -10   17.29    0.38 
  -4   2  10   13.57    0.27 
   4   2 -10   13.95    0.29 
  -4   2  10   13.99    0.30 
  -3  -2  10   18.85    0.28 
  -3  -2  10   18.88    0.37 
   3  -2 -10   18.17    0.38 
   3  -2 -10   18.35    0.30 
  -3  -2  10   18.70    0.38 
  -3   2  10   22.48    0.39 
   3   2 -10   22.70    0.40 
  -3   2  10   21.54    0.41 
   2  -2 -10    8.89    0.24 
  -2  -2  10    9.69    0.17 
  -2  -2  10    9.07    0.24 
   2  -2 -10    9.54    0.18 
   2   2 -10    6.12    0.16 
  -2   2  10    5.64    0.17 
  -2   2  10    5.98    0.17 
   2   2 -10    5.94    0.18 
   1  -2 -10   67.91    1.04 
   1  -2 -10   67.92    0.97 
  -1  -2  10   67.67    1.04 
  -1  -2  10   68.41    0.96 
   1   2 -10   68.66    0.99 
  -1   2  10   67.68    1.01 
  -1   2  10   66.96    1.01 
   1   2 -10   67.17    1.04 
   0  -2 -10    4.38    0.16 
   0  -2 -10    4.76    0.13 
   0  -2  10    4.83    0.16 
   0  -2  10    5.02    0.13 
   0   2 -10    5.75    0.15 
   0   2  10    5.79    0.17 
   0   2 -10    5.74    0.19 
   0   2  10    5.73    0.16 
   1  -2  10   63.10    0.96 
   1  -2  10   63.10    0.92 
  -1  -2 -10   61.20    0.91 
  -1  -2 -10   62.14    0.96 
   1   2  10   63.62    0.99 
  -1   2 -10   64.15    0.91 
   1   2  10   64.29    0.96 
  -1   2 -10   63.29    1.00 
   2  -2  10   16.79    0.34 
  -2  -2 -10   16.69    0.34 
   2  -2  10   16.78    0.32 
  -2  -2 -10   16.88    0.32 
   2   2  10   16.90    0.32 
  -2   2 -10   16.52    0.36 
   2   2  10   16.51    0.35 
   3  -2  10   10.04    0.24 
  -3  -2 -10    9.80    0.24 
  -3  -2 -10   10.09    0.23 
   3  -2  10   10.44    0.25 
   3   2  10    8.96    0.25 
  -3   2 -10    8.97    0.25 
   3   2  10    9.20    0.20 
   4  -2  10    4.85    0.16 
   4  -2  10    4.93    0.17 
  -4  -2 -10    4.51    0.16 
  -4  -2 -10    4.50    0.16 
   4   2  10    4.66    0.19 
  -4   2 -10    4.77    0.19 
   4   2  10    4.67    0.15 
   5  -2  10    5.30    0.19 
  -5  -2 -10    5.16    0.17 
   5  -2  10    4.88    0.17 
  -5  -2 -10    4.87    0.17 
  -5   2 -10    4.81    0.19 
   5   2  10    4.52    0.19 
  -6  -2 -10    1.83    0.12 
   6  -2  10    1.88    0.12 
  -6  -2 -10    2.08    0.13 
   6  -2  10    2.19    0.14 
  -6   2 -10    2.41    0.15 
   6   2  10    2.08    0.15 
   7  -2  10    4.07    0.17 
  -7  -2 -10    4.31    0.17 
  -7  -2 -10    4.16    0.18 
   7  -2  10    3.92    0.18 
   7   2  10    3.68    0.19 
  -7   2 -10    3.48    0.18 
  -8  -2 -10    4.75    0.20 
   8  -2  10    4.94    0.21 
   8  -2  10    4.54    0.19 
  -8  -2 -10    4.92    0.18 
  -8   2 -10    5.32    0.22 
   8   2  10    5.00    0.23 
   9  -2  10    1.11    0.12 
   9  -2  10    1.02    0.13 
  -9  -2 -10    0.97    0.12 
  -9  -2 -10    1.18    0.12 
  -9   2 -10    1.86    0.16 
   9   2  10    1.53    0.17 
  10  -2  10    6.97    0.27 
 -10  -2 -10    6.44    0.25 
 -10  -2 -10    6.47    0.26 
  10   2  10    7.58    0.29 
 -10   2 -10    7.47    0.27 
 -10   2 -10    7.36    0.24 
 -11  -2 -10    3.71    0.22 
  11  -2  10    4.18    0.23 
 -11   2 -10    4.41    0.20 
  11   2  10    4.20    0.24 
 -11   2 -10    4.52    0.23 
 -12  -2 -10    2.61    0.20 
  12  -2  10    2.37    0.21 
 -12   2 -10    0.91    0.12 
 -12   2 -10    1.26    0.16 
  12   2  10    1.01    0.15 
  13  -2  10    0.84    0.14 
 -13  -2 -10    0.86    0.14 
  13   2  10    0.81    0.15 
 -13   2 -10    0.81    0.14 
  14  -2  10    5.49    0.28 
 -14  -2 -10    5.91    0.29 
  14   2  10    5.39    0.30 
 -14   2 -10    4.91    0.27 
 -15  -2 -10    2.53    0.25 
  15  -2  10    2.20    0.22 
  15   2  10    2.83    0.26 
 -15   2 -10    2.93    0.25 
 -16   2 -10    2.07    0.34 
 -17   3  10    0.42    0.14 
 -16  -3  10    2.54    0.24 
 -16   3  10    1.57    0.19 
  16   3 -10    1.46    0.19 
  15  -3 -10    4.02    0.26 
 -15  -3  10    3.87    0.25 
 -15   3  10    3.44    0.24 
  15   3 -10    3.38    0.26 
 -14  -3  10    0.40    0.12 
  14  -3 -10    0.72    0.14 
 -14   3  10    1.60    0.18 
  14   3 -10    1.78    0.21 
 -13  -3  10    2.46    0.20 
  13  -3 -10    2.28    0.20 
  13   3 -10    1.73    0.19 
 -13   3  10    1.41    0.15 
  12  -3 -10   10.45    0.35 
  12  -3 -10   11.01    0.30 
 -12  -3  10   11.06    0.33 
  12   3 -10    9.89    0.33 
 -12   3  10    9.18    0.31 
 -11  -3  10    3.98    0.20
[truncated: 271,146 more chars]
